# Supplementary material for: The Identification of Small RNAs Differentially Expressed in Apple Buds Reveals a Potential Role of the Mir159-MYB Regulatory Module during Dormancy
Source: Plants (Basel). 2021 Dec 3;10(12):2665. doi: 10.3390/plants10122665 (PMC8703471; doi:10.3390/plants10122665)
Supplement: Supplementary file 1 [file plants-10-02665-s001.zip › Sup Table 1.xlsx]

## Sheet: Annotation small RNA
Mature_seq	Annotation MiRBase	Annotation PNRD	Annotation confirmed (JL)	Mature_id		Mature_seq	No1_mature_exp	No2_mature_exp	No3_mature_exp	No4_mature_exp	No5_mature_exp	No6_mature_exp	No7_mature_exp	No8_mature_exp	No9_mature_exp	No10_mature_exp	No11_mature_exp	No12_mature_exp	length
CACCTGGGACTTGCAGCCATG	mdm-miR10980	not found	mdm-miR10980	mdm-miR10980bMIMAT0043531,mdm-miR10980aMIMAT0043530		CACCTGGGACTTGCAGCCATG	0	0	0	0	0	0	0	5	0	0	0	0	21
CGGAATGAAGCTTACGAGAATG	mdm-miR10982	not found	mdm-miR10982	mdm-miR10982cMIMAT0043537,mdm-miR10982aMIMAT0043535,mdm-miR10982bMIMAT0043536,mdm-miR10982dMIMAT0043538		CGGAATGAAGCTTACGAGAATG	42	20	28	32	34	44	15	22	13	24	11	27	22
CAGAGCAAAACAGTCGTGGAA	mdm-miR10983	not found	mdm-miR10983	mdm-miR10983MIMAT0043546		CAGAGCAAAACAGTCGTGGAA	0	0	0	0	0	0	13	0	0	0	0	0	21
CTCACGTACGCTGTCCCGAGAA	mdm-miR10984	not found	mdm-miR10984	mdm-miR10984b-3pMIMAT0043610		CTCACGTACGCTGTCCCGAGAA	56	70	38	35	27	30	32	14	38	20	24	81	22
CCATATGTCCCTCCATATACT	mdm-miR10987	not found	mdm-miR10987	mdm-miR10987MIMAT0043553		CCATATGTCCCTCCATATACT	0	0	0	0	0	5	0	0	10	0	0	0	21
AGAGAAAATTCATTCCAACGC	mdm-miR10988	not found	mdm-miR10988	mdm-miR10988MIMAT0043554		AGAGAAAATTCATTCCAACGC	0	0	0	0	0	0	0	0	0	0	2	0	21
CAAAGCTTTTAATATCAGTCGA	mdm-miR10989	not found	mdm-miR10989	mdm-miR10989cMIMAT0043557,mdm-miR10989dMIMAT0043558,mdm-miR10989aMIMAT0043555,mdm-miR10989eMIMAT0043559,mdm-miR10989bMIMAT0043556		CAAAGCTTTTAATATCAGTCGA	0	0	0	0	0	0	0	1	29	0	0	0	22
CCAAGGAAAATTTTATGACGA	mdm-miR10990	not found	mdm-miR10990	mdm-miR10990MIMAT0043560		CCAAGGAAAATTTTATGACGA	0	0	0	0	0	0	0	0	4	0	0	0	21
GTATTCTTTCATCTTCTACTA	mdm-miR10994	not found	mdm-miR10994	mdm-miR11004MIMAT0043603		GTATTCTTTCATCTTCTACTA	10	0	0	0	0	11	30	2	13	3	0	0	21
TGCTTTTTTCTTGACCATAGC	mdm-miR10994	not found	mdm-miR10994	mdm-miR10994-3pMIMAT0043573		TGCTTTTTTCTTGACCATAGC	10	0	8	0	0	9	11	4	25	7	11	0	21
CAAGCTTCCTCTTCATACTCGT	mdm-miR10995	not found	mdm-miR10995	mdm-miR10995MIMAT0043579		CAAGCTTCCTCTTCATACTCGT	0	0	9	0	0	0	0	0	0	0	12	0	22
TCACCATTGCATCTCATGTTCC	mdm-miR10996	not found	mdm-miR10996	mdm-miR10996bMIMAT0043622		TCACCATTGCATCTCATGTTCC	0	0	0	0	0	0	0	0	0	0	3	0	22
TAACCTTATTTGATTTCACGA	mdm-miR10997	not found	mdm-miR10997	mdm-miR10997MIMAT0043581		TAACCTTATTTGATTTCACGA	0	0	0	0	0	0	0	3	0	0	0	0	21
CTTGGGATTCAGTCTAGGACTT	mdm-miR10998	not found	mdm-miR10998	mdm-miR10998MIMAT0043585		CTTGGGATTCAGTCTAGGACTT	5	0	0	0	14	8	0	3	16	0	0	0	22
TACAAAGATGGACTCCACCCTA	mdm-miR11001	not found	mdm-miR11001	mdm-miR11001MIMAT0043599		TACAAAGATGGACTCCACCCTA	4	0	0	0	0	0	0	0	0	0	0	0	22
CCCAGTCACCTCCGAAGCTCA	mdm-miR11002	not found	mdm-miR11002	mdm-miR11002c-5pMIMAT0043596		CCCAGTCACCTCCGAAGCTCA	0	11	0	0	0	0	9	0	0	0	0	0	21
GAGGATGAGCTTCGGCGGTGA	mdm-miR11002	not found	mdm-miR11002	mdm-miR11002bMIMAT0043601,mdm-miR11002aMIMAT0043600,mdm-miR11002c-3pMIMAT0043597		GAGGATGAGCTTCGGCGGTGA	0	3	0	0	0	0	0	1	0	0	0	0	21
CTACTATATGGTCGTACACATC	mdm-miR11005	not found	mdm-miR11005	mdm-miR11005MIMAT0043604		CTACTATATGGTCGTACACATC	51	52	40	93	27	17	125	24	241	68	34	46	22
AGTAACTATAGCTGTTTTCTA	mdm-miR11010	not found	mdm-miR11010	mdm-miR11010MIMAT0043612		AGTAACTATAGCTGTTTTCTA	4	0	0	0	0	0	0	0	18	0	0	0	21
AAGTTCATTCAAACACCATGT	mdm-miR11011	not found	mdm-miR11011	mdm-miR11011aMIMAT0043613		AAGTTCATTCAAACACCATGT	46	0	2	0	11	5	24	10	8	9	12	49	21
CCGCTGCCTATGCAATGCACCC	mdm-miR11012	not found	mdm-miR11012	mdm-miR11012bMIMAT0043615,mdm-miR11012aMIMAT0043614		CCGCTGCCTATGCAATGCACCC	0	0	0	0	12	0	0	0	0	0	0	0	22
CGACCATTCATGAAAACTGCC	mdm-miR11014	not found	mdm-miR11014	mdm-miR11014MIMAT0043623		CGACCATTCATGAAAACTGCC	20	41	26	28	41	18	9	8	51	0	15	71	21
TGGGTAAAATGACCCAACCTG	mdm-miR11015	not found	mdm-miR11015	mdm-miR11015MIMAT0043624		TGGGTAAAATGACCCAACCTG	47	9	51	32	51	16	13	10	41	12	38	0	21
CTCTAATCTGCCCAACAACTT	mdm-miR11017	not found	mdm-miR11017	mdm-miR11017MIMAT0043627		CTCTAATCTGCCCAACAACTT	0	7	9	0	0	0	0	0	0	0	0	0	21
ACCTAGCTCTGATACCATGAA	mdm-miR1511	not found	mdm-miR1511	mdm-miR1511MIMAT0026188,mdm-miR1511		ACCTAGCTCTGATACCATGAA	36555	35340	23276	8144	23413	20940	40830	16577	50843	20042	29196	12456	21
TTGACAGAAGAGAGAGAGCAC	mdm-miR156	mdm-miR156	mdm-miR156	mdm-miR156tMIMAT0025886,mdm-miR156uMIMAT0025887,mdm-miR156vMIMAT0025888,mdm-miR156wMIMAT0025889,ahy-miR156c,ahy-miR157k,ath-miR157m,can-miR157,far-miR156b,lsa-miR157,mdm-miR156t,mdm-miR156u,mdm-miR156v,mdm-miR156w,nbe-miR157a,nbe-miR157b,pam-miR157,par-miR157,pts-miR157,sin-miR157,vun-miR156f,zel-miR157,gba-miR156r,gba-miR156s		TTGACAGAAGAGAGAGAGCAC	31	34	14	0	14	2	25	12	46	25	7	10	21
AACTGCCGACTCATTCACTCA	mdm-miR319	not found	mdm-miR319	mdm-miR319dMIMAT0043552		AACTGCCGACTCATTCACTCA	105	70	59	32	69	89	204	121	141	35	116	64	21
GAGCTCTTCTTCAGTCCAGTCC	mdm-miR319	not found	mdm-miR319	mdm-miR319hMIMAT0043595,mdm-miR319c-5pMIMAT0037474		GAGCTCTTCTTCAGTCCAGTCC	24	14	3	0	0	15	28	0	20	1	3	0	22
TCCATCCTCCTGTGACATGAA	mdm-miR3627	not found	mdm-miR3627	mdm-miR3627dMIMAT0043534		TCCATCCTCCTGTGACATGAA	1	0	0	0	0	0	0	0	0	0	0	0	21
TACGCAGGAGAGATGACGCCG	mdm-miR391	not found	mdm-miR391	mdm-miR391MIMAT0026019,mdm-miR391		TACGCAGGAGAGATGACGCCG	25	39	34	55	7	20	31	19	138	72	119	0	21
ATCATGCGATCCCTTCGGACG	mdm-miR393	not found	mdm-miR393	mdm-miR393fMIMAT0026063,mdm-miR393dMIMAT0026061,mdm-miR393eMIMAT0026062,mdm-miR393d,mdm-miR393e,mdm-miR393f		ATCATGCGATCCCTTCGGACG	0	0	0	0	0	0	3	0	0	0	0	0	21
ACAGGGAAGAGGTAGAGCATG	mdm-miR408	not found	mdm-miR408	mdm-miR408cMIMAT0026032,mdm-miR408dMIMAT0026033,mdm-miR408bMIMAT0026031,mdm-miR408b,mdm-miR408c,mdm-miR408d		ACAGGGAAGAGGTAGAGCATG	19	7	13	28	1	0	5	5	0	27	16	0	21
TCTTTCCTATCCCTCCCATTCC	mdm-miR482b	not found	mdm-miR482b	mdm-miR482bMIMAT0026022,mdm-miR482b		TCTTTCCTATCCCTCCCATTCC	17997	17863	9450	10295	6298	6641	27725	4279	32213	5593	8637	4222	22
TCTTTCCTAACCCTCCCATTCC	mdm-miR482c	not found	mdm-miR482c	mdm-miR482cMIMAT0026023,mdm-miR482c		TCTTTCCTAACCCTCCCATTCC	15867	18454	8880	7812	6171	5714	20324	3842	24190	5489	8170	3568	22
AATGGAAGGGTAGGAAAGAAG	mdm-miR482d	not found	mdm-miR482d	mdm-miR482dMIMAT0026039,mdm-miR482d		AATGGAAGGGTAGGAAAGAAG	6185	4331	3261	3144	3715	3037	6754	2834	7900	3210	5220	5835	21
TCTGTCGAAGGTGAGATGGTGC	mdm-miR5225	not found	mdm-miR5225	mdm-miR5225aMIMAT0026056,mdm-miR5225bMIMAT0026057,mdm-miR5225a,mdm-miR5225b		TCTGTCGAAGGTGAGATGGTGC	24	0	1	32	16	7	3	0	1	0	1	16	22
TCTGTCGTGGGTGAGATGGTGC	mdm-miR5225c	not found	mdm-miR5225c	mdm-miR5225cMIMAT0026052,mdm-miR5225c		TCTGTCGTGGGTGAGATGGTGC	3174	1383	1615	1067	992	882	10286	1232	8893	3184	7324	5077	22
TGCATTTGCACCTGCACTTGT	mdm-miR530	not found	mdm-miR530	mdm-miR530aMIMAT0043542,mdm-miR530cMIMAT0043544,mdm-miR530bMIMAT0043543		TGCATTTGCACCTGCACTTGT	0	0	9	0	0	0	0	0	0	0	0	0	21
TGACAAGGAGAGAGAGCACGC	mdm-miR535	not found	mdm-miR535	mdm-miR535bMIMAT0026025,mdm-miR535cMIMAT0026026,mdm-miR535b,mdm-miR535c		TGACAAGGAGAGAGAGCACGC	21	61	20	0	19	30	43	43	81	15	21	0	21
TGTTATATTGTCAGATTGTCA	mdm-miR7120	not found	mdm-miR7120	mdm-miR7120b-5pMIMAT0026038,mdm-miR7120a-5pMIMAT0026037,mdm-miR7120a,mdm-miR7120b		TGTTATATTGTCAGATTGTCA	22	20	6	39	39	26	134	24	146	52	34	27	21
TCCTCTTGGTGATCGCCCTGC	mdm-miR7121	not found	mdm-miR7121	mdm-miR7121eMIMAT0026044,mdm-miR7121dMIMAT0026043,mdm-miR7121hMIMAT0026047,mdm-miR7121gMIMAT0026046,mdm-miR7121fMIMAT0026045,mdm-miR7121d,mdm-miR7121e,mdm-miR7121f,mdm-miR7121g,mdm-miR7121h		TCCTCTTGGTGATCGCCCTGC	922	500	340	1107	387	314	2714	238	3067	306	391	267	21
TCCTCTTGGTGATCGCCCTGT	miR7121	not found	mdm-miR7121	mdm-miR7121cMIMAT0026042,mdm-miR7121bMIMAT0026041,mdm-miR7121aMIMAT0026040,mdm-miR7121a,mdm-miR7121b,mdm-miR7121c		TCCTCTTGGTGATCGCCCTGT	944	668	276	537	411	322	1439	426	2001	367	321	453	21
CACCAATATCAACTTTATTTG	mdm-miR7124	not found	mdm-miR7124	mdm-miR7124aMIMAT0026054,mdm-miR7124bMIMAT0026055,mdm-miR7124a,mdm-miR7124b		CACCAATATCAACTTTATTTG	39	22	19	0	28	10	83	12	43	38	14	73	21
TTGCGTTCCACTGATTCTTTCG	mdm-miR7126	not found	mdm-miR7126	mdm-miR7126-3pMIMAT0037475		TTGCGTTCCACTGATTCTTTCG	193	166	126	236	137	126	144	66	79	62	105	623	22
ATACTCATCGAATTTGTCATA	mdm-miR7127	not found	mdm-miR7127	mdm-miR7127aMIMAT0026064,mdm-miR7127bMIMAT0026065,mdm-miR7127a,mdm-miR7127b		ATACTCATCGAATTTGTCATA	1	0	0	0	0	0	0	0	0	0	0	0	21
TTAGATGACCATCAACGAACA	mdm-miR827	not found	mdm-miR827	mdm-miR827MIMAT0026028,mdm-miR827		TTAGATGACCATCAACGAACA	27	37	17	0	19	7	17	8	28	13	41	63	21
TTCGTTGTCTGTTCGACCTGA	mdm-miR858	mdm-miR858	mdm-miR858	mdm-miR858MIMAT0026070,mdm-miR858		TTCGTTGTCTGTTCGACCTGA	1088	314	206	1431	335	149	3781	403	5555	309	533	304	21
TTCCCAAGCCCGCCCATTCCAA	miR482-3p	mdo-miR482	mdo-miR482	ppe-miR482c-3p		TTCCCAAGCCCGCCCATTCCAA	0	1	0	0	0	1	0	0	0	0	0	1	22
TTCCCAAGCCCGCCCATTCCTA	miR482	mdo-miR482	mdo-miR482	mdm-miR482a-3pMIMAT0011165,mdm-miR482a-3p		TTCCCAAGCCCGCCCATTCCTA	1544	2064	780	1553	731	482	1465	396	1642	374	614	769	22
GTTGGGAATCGAAGCATCACGA	miR10978	not found	miR10978	mdm-miR10978bMIMAT0043528,mdm-miR10978aMIMAT0043527		GTTGGGAATCGAAGCATCACGA	0	0	0	0	0	10	0	0	0	0	5	0	22
CTGACAGAAGAGAGTGAGCAC	miR156	miR156	miR156	avm-miR156,sit-miR113-1-npr,sit-miR113-2-npr		CTGACAGAAGAGAGTGAGCAC	0	0	0	0	0	0	1	0	0	0	0	0	21
TGACAGAAGAGAGTGAGCAC	not found	miR156	miR156	mdm-miR156eMIMAT0025871,mdm-miR156mMIMAT0025879,mdm-miR156iMIMAT0025875,mdm-miR156bMIMAT0025868,mdm-miR156hMIMAT0025874,mdm-miR156lMIMAT0025878,mdm-miR156nMIMAT0025880,mdm-miR156fMIMAT0025872,mdm-miR156jMIMAT0025876,mdm-miR156cMIMAT0025869,mdm-miR156gMIMAT0025873,mdm-miR156aMIMAT0025867,mdm-miR156dMIMAT0025870,mdm-miR156oMIMAT0025881,mdm-miR156kMIMAT0025877,aly-miR156a-5p,aly-miR156b-5p,aly-miR15…		TGACAGAAGAGAGTGAGCAC	42	17	51	0	32	4	93	28	105	31	47	35	20
TGACAGAAGAGAGTGAGCACA	miR156	miR156	miR156	bna-miR156a,hvu-miR156,rco-miR156a,rco-miR156b,rco-miR156c,rco-miR156d,sit-miR156a-1,sit-miR156a-2,sit-miR156a-3,sit-miR156a-4,sit-miR156a-5,ssl-miR156,ssp-miR156,tae-miR156		TGACAGAAGAGAGTGAGCACA	0	0	0	0	20	0	0	0	0	0	0	0	21
TGACAGAAGAGAGTGAGCACT	miR156	miR156	miR156	gma-miR156q,gma-miR156s		TGACAGAAGAGAGTGAGCACT	0	0	0	0	11	0	0	0	0	0	4	0	21
TTGACAGAAGAGAGCGAGCAC	not found	miR156	miR156	sit-miR16-npr		TTGACAGAAGAGAGCGAGCAC	1	0	0	0	0	0	0	0	0	0	0	0	21
TTGACAGAAGAGAGTGAGCAC	miR156	miR156	miR156	gma-miR156k,gma-miR156n,gma-miR156o,sit-miR156d-1,sit-miR156d-2		TTGACAGAAGAGAGTGAGCAC	188	77	132	52	65	84	169	73	203	54	127	25	21
TTGACAGAAGATAGAGAGCAC	miR156/157	miR156	miR156	mdm-miR156acMIMAT0025895,mdm-miR156abMIMAT0025894,ahy-miR156b-5p,ahy-miR157a-5p,aly-miR157a-5p,aly-miR157b-5p,aly-miR157c-5p,ath-miR157a,ath-miR157b,ath-miR157c,bna-miR156b,bna-miR156c,bna-miR156g,bol-miR157a,bra-miR157a,cca-miR156c,cme-miR156b,cpa-miR156e,cpa-miR156f,gma-miR156c,gma-miR156d,gma-miR156e,gma-miR156i,gma-miR156j,gma-miR156l,gma-miR156m,gra-miR157a,gra-miR157b,han-miR156c,lus-miR156…		TTGACAGAAGATAGAGAGCAC	12	11	0	0	26	7	37	9	18	6	14	26	21
CTGACAGAAGATAGAGAGCAC	miR156	miR156/157	miR156/157	mdm-miR156sMIMAT0025885,mdm-miR156rMIMAT0025884,mdm-miR156pMIMAT0025882,mdm-miR156qMIMAT0025883,mdm-miR156p,mdm-miR156q,mdm-miR156r,mdm-miR156s,smo-miR156b		CTGACAGAAGATAGAGAGCAC	0	0	0	0	13	4	0	0	0	0	3	0	21
TGACAGAAGATAGAGAGCAC	not found	miR156/157	miR156/157	mdm-miR156xMIMAT0025890,mdm-miR156yMIMAT0025891,mdm-miR156zMIMAT0025892,mdm-miR156aaMIMAT0025893,aly-miR157d-5p,aqc-miR156a,aqc-miR156b,ath-miR157d,cme-miR156f,mdm-miR156aa,mdm-miR156x,mdm-miR156y,mdm-miR156z,nta-miR156g,nta-miR156h,nta-miR156i,nta-miR156j,ppe-miR156f		TGACAGAAGATAGAGAGCAC	0	0	0	0	0	0	0	0	0	0	2	0	20
AGCTGCCGACTCATTCATTCA	miR159	not found	miR159	t03063567_x79		AGCTGCCGACTCATTCATTCA	5	6	10	0	14	5	18	2	19	0	0	0	21
AGCTGCTTAGCTATGGATCCC	miR159	miR159	miR159	gma-miR159d		AGCTGCTTAGCTATGGATCCC	0	0	0	0	0	0	0	0	1	0	0	0	21
CTTGGATTGAAGGGAGCTCC	not found	miR159	miR159	mdm-miR159aMIMAT0025898,mdm-miR159bMIMAT0025899,cpa-miR159b,mdm-miR159a,mdm-miR159b,sit-miR110-npr		CTTGGATTGAAGGGAGCTCC	8700	2606	2034	11350	3864	2337	25534	4972	22304	7987	8867	21191	20
CTTGGATTGAAGGGAGCTCCA	not found	miR159	miR159	psi-miR159		CTTGGATTGAAGGGAGCTCCA	24	27	18	50	35	6	111	24	44	38	46	0	21
CTTGGATTGAAGGGAGCTCCC	miR159	miR159	miR159	pta-miR159c,smo-miR159		CTTGGATTGAAGGGAGCTCCC	9	0	1	29	0	1	9	8	23	1	9	0	21
CTTGGATTGAAGGGAGCTCCT	miR159	miR159	miR159	ptc-miR159d,sbi-miR159b,sof-miR159c,zma-miR159c-3p,zma-miR159d-3p		CTTGGATTGAAGGGAGCTCCT	202	80	102	112	100	90	230	152	230	261	509	653	21
CTTGGATTGAAGGGAGCTCT	not found	miR159	miR159	bdi-miR159a-3p		CTTGGATTGAAGGGAGCTCT	11	19	25	1	1	4	66	25	73	32	52	1	20
CTTGGATTGAAGGGAGCTCTA	miR159	miR159	miR159	osa-miR159f		CTTGGATTGAAGGGAGCTCTA	65	26	24	111	39	35	69	23	53	11	33	12	21
TTGGATTGAAGGGAGCTCCA	not found	miR159	miR159	pta-miR159a		TTGGATTGAAGGGAGCTCCA	0	0	0	0	0	0	0	4	0	0	0	0	20
TTGGATTGAAGGGAGCTCCT	not found	miR159	miR159	sof-miR319b		TTGGATTGAAGGGAGCTCCT	0	0	0	1	0	0	7	1	0	0	1	34	20
TTTGGACTGAAGGGAGCTCTA	miR159	miR159	miR159	aqc-miR159		TTTGGACTGAAGGGAGCTCTA	52	16	15	4	15	19	33	15	28	17	21	2	21
TTTGGATTGAAAGGAGCTCTT	miR159	miR159	miR159	sof-miR159e		TTTGGATTGAAAGGAGCTCTT	1	0	0	0	1	0	0	0	0	0	0	0	21
TTTGGATTGAAGGGAGCTCTA	miR159	miR159	miR159	mdm-miR159dMIMAT0043539,mdm-miR159eMIMAT0043540,mdm-miR159fMIMAT0043541,ahy-miR159,aly-miR159a-3p,ath-miR159a,bna-miR159,bra-miR159a,cme-miR159a,cpa-miR159a,csi-miR159,gma-miR159a-3p,gma-miR159e-3p,hbr-miR159a,htu-miR159a,ltu-miR159,mes-miR159a,mes-miR159b,mtr-miR159a,nta-miR159,ppe-miR159,ptc-miR159a,ptc-miR159b,pvu-miR159a.1,rco-miR159,sly-miR159,vun-miR159a,vvi-miR159c,ghr-miR159b,gba-miR159b,…		TTTGGATTGAAGGGAGCTCTA	149278	95818	74100	74690	73731	58022	166306	42037	194387	35766	70080	86306	21
TTTGGATTGAAGGGAGCTCTC	miR159	miR159	miR159	lus-miR159b		TTTGGATTGAAGGGAGCTCTC	105	42	48	55	51	41	117	21	84	35	50	5	21
TTTGGATTGAAGGGAGCTCTG	miR159	miR159	miR159	bdi-miR159b-3p.1,far-miR159,hvu-miR159a,hvu-miR159b,oru-miR159,osa-miR159a.1,osa-miR159b,pgl-miR159,sar-miR159,sbi-miR159a,sof-miR159a,sof-miR159b,sof-miR159d,spr-miR159,ssp-miR159a,tae-miR159a,tae-miR159b,zma-miR159a-3p,zma-miR159b-3p,zma-miR159f-3p,zma-miR159j-3p,zma-miR159k-3p		TTTGGATTGAAGGGAGCTCTG	58	14	31	10	20	16	32	14	45	18	38	8	21
TTTGGATTGAAGGGAGCTCTT	miR159	miR159	miR159	aly-miR159b-3p,ath-miR159b,lus-miR159c		TTTGGATTGAAGGGAGCTCTT	594	553	331	578	331	222	791	207	656	156	324	417	21
TTTGGTTTGAAGGGAGCTCTA	miR159	not found	miR159	pde-miR159		TTTGGTTTGAAGGGAGCTCTA	0	0	0	24	0	1	2	5	4	1	2	3	21
CTTGGACTGAAGGGAGCTCCC	miR159/319	miR159/319	miR159/319	ppt-miR319c,ppt-miR319d-3p,ppt-miR319e		CTTGGACTGAAGGGAGCTCCC	52	7	5	0	2	27	44	9	169	23	34	54	21
TTTGGATTGAAGGGAGCTCCT	miR159	miR159/319	miR159/319	aly-miR159c-3p,ath-miR159c		TTTGGATTGAAGGGAGCTCCT	5	0	0	0	0	0	0	0	0	0	0	0	21
TGCCTGGCTCCCTGTATGCC	not found	miR160	miR160	bdi-miR160f,gma-miR160b,gma-miR160c,gma-miR160d,gma-miR160e,htu-miR160a		TGCCTGGCTCCCTGTATGCC	0	0	0	0	0	0	0	0	0	0	0	42	20
TGCCTGGCTCCCTGTATGCCA	miR160	miR160	miR160	mdm-miR160dMIMAT0025903,mdm-miR160aMIMAT0025900,mdm-miR160cMIMAT0025902,mdm-miR160eMIMAT0025904,mdm-miR160bMIMAT0025901,aly-miR160a-5p,aly-miR160b-5p,aly-miR160c-5p,aqc-miR160b,ath-miR160a,ath-miR160b,ath-miR160c,bdi-miR160a-5p,bdi-miR160b-5p,bdi-miR160c-5p,bdi-miR160d-5p,bna-miR160a,bna-miR160b,bna-miR160c,bna-miR160d,bra-miR160a-5p,cca-miR160b,cme-miR160a,cme-miR160b,cme-miR160c,cpa-miR160a,cpa…		TGCCTGGCTCCCTGTATGCCA	6	0	12	30	31	3	6	1	15	16	6	0	21
TGAAAGTGACTACATCGGGGT	miR161	miR161	miR161	ath-miR161.1		TGAAAGTGACTACATCGGGGT	0	0	0	0	0	0	0	0	9	0	0	0	21
TCGATAAACCTCTGCATCCA	not found	miR162	miR162	gma-miR162a,zma-miR162-3p		TCGATAAACCTCTGCATCCA	0	0	0	0	0	14	0	0	0	4	2	35	20
TCGATAAACCTCTGCATCCAG	miR162	miR162	miR162	mdm-miR162aMIMAT0025905,mdm-miR162bMIMAT0025906,aau-miR162,aly-miR162a-3p,aly-miR162b-3p,ath-miR162a,ath-miR162b,bra-miR162-3p,cme-miR162,cpa-miR162a,csi-miR162,gma-miR162b,gma-miR162c,hpe-miR162a,htu-miR162a,llu-miR162,lsa-miR162,lus-miR162a,lus-miR162b,mdm-miR162a,mdm-miR162b,mes-miR162,mtr-miR162,nta-miR162a,nta-miR162b,osa-miR162a,pde-miR162,ppe-miR162,ptc-miR162a,ptc-miR162b,rco-miR162,sbi-m…		TCGATAAACCTCTGCATCCAG	551	365	267	186	348	297	203	138	239	112	300	390	21
TCGATAAACCTGTGCATCCAG	miR162	not found	miR162	bna-miR162a		TCGATAAACCTGTGCATCCAG	0	0	1	0	0	0	0	0	0	0	1	0	21
TCGATAAGCCTCTGCATCCAG	miR162	miR162	miR162	osa-miR162b		TCGATAAGCCTCTGCATCCAG	0	0	0	0	0	0	1	0	0	0	0	0	21
TGGAGGCAGCGGTTCATCGATC	miR162	miR162	miR162	csi-miR162*		TGGAGGCAGCGGTTCATCGATC	5	37	4	0	0	8	0	8	16	10	16	0	22
TTGATAAACCTCTGCATCCAG	miR162	not found	miR162	cln-miR162		TTGATAAACCTCTGCATCCAG	0	0	0	0	0	0	0	0	0	0	0	1	21
CACGTACTCCCCTTCTCCAAC	miR164	miR164	miR164	aly-miR164a-3p		CACGTACTCCCCTTCTCCAAC	0	0	0	0	0	0	0	0	1	0	0	0	21
TGGAGAAGCAGGGCACGTGC	not found	miR164	miR164	gma-miR164b,gma-miR164c,gma-miR164d		TGGAGAAGCAGGGCACGTGC	0	0	0	0	0	0	0	2	0	0	0	0	20
TGGAGAAGCAGGGCACGTGCA	miR164	miR164	miR164	mdm-miR164cMIMAT0025909,mdm-miR164dMIMAT0025910,mdm-miR164eMIMAT0025911,mdm-miR164bMIMAT0025908,mdm-miR164fMIMAT0025912,aly-miR164a-5p,aly-miR164b-5p,ath-miR164a,ath-miR164b,bdi-miR164a-5p,bdi-miR164b,bdi-miR164e,bna-miR164a,bra-miR164a,cav-miR164,cme-miR164c,cme-miR164d,cpa-miR164a,cpa-miR164b,cpa-miR164c,csi-miR164,ctr-miR164,gma-miR164a,gma-miR164e,gma-miR164f,gma-miR164g,gma-miR164h,gma-miR16…		TGGAGAAGCAGGGCACGTGCA	739	793	403	159	459	293	706	179	995	90	190	207	21
TGGAGAAGCAGGGCACGTGCG	miR164	miR164	miR164	aly-miR164c-5p,ath-miR164c,bna-miR164b,bna-miR164c,bna-miR164d,bra-miR164b-5p,bra-miR164c-5p,bra-miR164d-5p,cln-miR164		TGGAGAAGCAGGGCACGTGCG	0	0	0	0	1	0	0	0	0	0	0	0	21
TGGAGAAGCAGGGTACGTGCA	miR164	miR164	miR164	cca-miR164,osa-miR164c		TGGAGAAGCAGGGTACGTGCA	0	0	1	0	0	0	0	0	0	0	0	0	21
TCGGACCAGGCTTCATCCCC	not found	miR165	miR165	aly-miR165a-3p,aly-miR165b-3p		TCGGACCAGGCTTCATCCCC	3	1	0	2	1	3	0	7	0	5	9	4	20
TCGGACCAGGCTTCATCCCCC	miR165	miR165	miR165	ath-miR165a,ath-miR165b,bna-miR166f,flm-miR166,hce-miR165,lus-miR166b		TCGGACCAGGCTTCATCCCCC	392	226	246	355	171	187	243	104	188	87	127	417	21
CCGGACCAGGCTTCATTCCCA	not found	miR166	miR166	tae-miR166a_npr		CCGGACCAGGCTTCATTCCCA	0	0	0	1	0	0	0	0	0	0	0	0	21
CGGACCAGGCTTCATTCCCC	not found	miR166	miR166	gma-miR166m,ptc-miRf10192-akr		CGGACCAGGCTTCATTCCCC	4764	3008	2698	2996	2556	2810	2988	1278	2257	1197	2032	4946	20
CTCGGACCAGGCTTCATTCC	not found	miR166	miR166	ptc-miRf10514-akr		CTCGGACCAGGCTTCATTCC	0	0	1	0	0	0	0	0	0	0	0	0	20
CTCGGACCAGGCTTCATTCCC	miR166	miR166	miR166	bdi-miR166e-3p		CTCGGACCAGGCTTCATTCCC	3	9	3	2	1	1	0	4	3	2	5	1	21
GGAATGTTGTCTGGCTCGAGG	miR166	miR166	miR166	aly-miR166a-5p,aly-miR166c-5p,aly-miR166d-5p,bdi-miR166e-5p,csi-miR166e*,gma-miR166a-5p,gma-miR166c-5p,gma-miR166l,mtr-miR166g-5p,osa-miR166d-5p,stu-miR166a-5p,vun-miR166c*.1,vun-miR166c*.2,vun-miR166c*.3,vun-miR166c*.4,zma-miR166c-5p		GGAATGTTGTCTGGCTCGAGG	133	214	178	90	69	92	89	126	122	47	125	294	21
GGAATGTTGTTTGGCTCGAGG	miR166	miR166	miR166	aly-miR166g-5p,gma-miR166h-5p,gma-miR166j-5p,stu-miR166c-5p		GGAATGTTGTTTGGCTCGAGG	3	14	0	0	18	0	0	3	0	0	5	0	21
GGGATGTTGTCTGGCTCGACA	miR166	not found	miR166	sly-miR166c-5p		GGGATGTTGTCTGGCTCGACA	5	0	0	0	0	0	0	0	0	0	0	0	21
TCGAACCAGGCTTCATTCCCC	not found	miR166	miR166	osa-miR166e-3p		TCGAACCAGGCTTCATTCCCC	316	210	190	317	131	178	194	70	175	97	131	415	21
TCGGACCAGGCTTCAATCCCT	miR166	miR166	miR166	bdi-miR166h-3p,osa-miR166k-3p,osa-miR166l-3p,sbi-miR166e,sbi-miR166g,sit-miR166d,zma-miR166j-3p,zma-miR166k-3p,zma-miR166n-3p		TCGGACCAGGCTTCAATCCCT	17	6	5	0	3	8	7	5	3	2	5	0	21
TCGGACCAGGCTTCATTCCC	not found	miR166	miR166	cme-miR166g,cpt-miR166,csi-miR166c,gma-miR166p,gma-miR166q,gma-miR166r,gma-miR166s,gma-miR166t,sbi-miR166a,sbi-miR166b,sbi-miR166c,sbi-miR166d,sbi-miR166h,sbi-miR166i,sbi-miR166j,tcc-miR166b,zma-miR166b-3p,zma-miR166c-3p,zma-miR166d-3p,zma-miR166e,zma-miR166f,zma-miR166g-3p,zma-miR166h-3p,zma-miR166i-3p,ghr-miR166h		TCGGACCAGGCTTCATTCCC	2540	1409	1698	3106	1343	1475	1370	685	1296	770	1240	3144	20
TCGGACCAGGCTTCATTCCCC	miR166	miR166	miR166	mdm-miR166dMIMAT0025916,mdm-miR166bMIMAT0025914,mdm-miR166hMIMAT0025920,mdm-miR166eMIMAT0025917,mdm-miR166aMIMAT0025913,mdm-miR166iMIMAT0025921,mdm-miR166fMIMAT0025918,mdm-miR166gMIMAT0025919,mdm-miR166cMIMAT0025915,mdm-miR166jMIMAT0043545,aly-miR166a-3p,aly-miR166b-3p,aly-miR166c-3p,aly-miR166d-3p,aly-miR166e-3p,aly-miR166f-3p,aly-miR166g-3p,aly-miR166h-3p,aqc-miR166b,aqc-miR166e,ath-miR166a,ath…		TCGGACCAGGCTTCATTCCCC	1747791	1218741	1021288	1545121	802971	981170	1086168	443716	891166	445694	756349	2096807	21
TCGGACCAGGCTTCATTCCCCA	miR166	miR166	miR166	sit-miR60-npr		TCGGACCAGGCTTCATTCCCCA	62	24	21	40	51	7	68	29	37	8	37	27	22
TCGGACCAGGCTTCATTCCCCC	miR166	miR166	miR166	csi-miR166a,ctr-miR166,hbr-miR166b,lus-miR166i,lus-miR166k,sit-miR59-npr		TCGGACCAGGCTTCATTCCCCC	205	210	114	140	62	175	164	71	190	83	150	225	22
TCGGACCAGGCTTCATTCCCCT	miR166	miR166	miR166	sit-miR58-1-npr,sit-miR58-2-npr,sit-miR58-3-npr		TCGGACCAGGCTTCATTCCCCT	356	180	138	50	157	156	246	116	258	145	128	244	22
TCGGACCAGGCTTCATTCCCG	miR166	miR166	miR166	cpa-miR166d,gma-miR166j-3p,ghr-miR166k		TCGGACCAGGCTTCATTCCCG	477	148	185	12	128	249	121	123	116	115	206	17	21
TCGGACCAGGCTTCATTCCCT	miR166	miR166	miR166	csi-miR166d,osa-miR166m		TCGGACCAGGCTTCATTCCCT	550	254	222	275	210	288	246	145	214	112	229	337	21
TCGGACCAGGCTTCATTCCCTT	miR166	miR166	miR166	crt-miR166b		TCGGACCAGGCTTCATTCCCTT	0	0	0	0	0	0	0	0	0	0	4	0	22
TCGGACCAGGCTTCATTCCT	not found	miR166	miR166	aqc-miR166c,sbi-miR166k		TCGGACCAGGCTTCATTCCT	28	1	0	3	0	9	25	12	30	5	34	66	20
TCGGACCAGGCTTCATTCCTA	miR166	miR166	miR166	mtr-miR166b		TCGGACCAGGCTTCATTCCTA	0	0	0	0	0	0	1	0	0	0	0	1	21
TCGGACCAGGCTTCATTCCTC	miR166	miR166	miR166	aqc-miR166a,aqc-miR166d,cme-miR166e,dpr-miR166a,ini-miR166,lus-miR166e,mes-miR166j,mtr-miR166c,mtr-miR166f,osa-miR166g-3p,osa-miR166h-3p,pab-miR166a,sbi-miR166f,sit-miR166c,sly-miR166c-3p,ssl-miR166a,stu-miR166b,tcc-miR166c,zma-miR166l-3p,zma-miR166m-3p		TCGGACCAGGCTTCATTCCTC	592	245	214	246	174	322	213	151	181	130	259	264	21
TCGGACCAGGCTTCATTCCTT	miR166	miR166	miR166	bdi-miR166j,lus-miR166f,pab-miR166b,pga-miR166,ptc-miR166n,ptc-miR166o,ptc-miR166q		TCGGACCAGGCTTCATTCCTT	0	0	3	0	0	0	22	0	17	1	0	0	21
TCTCGGACCAGGCTTCATTCC	miR166	miR166	miR166	bdi-miR166f,gma-miR166h-3p,gma-miR166k,sit-miR166b-1,sit-miR166b-2,sit-miR166b-3,vun-miR166b.2,vun-miR166b.3,ghr-miR166f,ghr-miR166g,gba-miR166w,gba-miR166x,gba-miR166y,gba-miR166z		TCTCGGACCAGGCTTCATTCC	63	16	8	134	32	20	28	6	16	24	50	102	21
TTCGGACCAGGCTTCATTCCCC	miR166	miR166	miR166	sit-miR21-1-npr,sit-miR21-2-npr		TTCGGACCAGGCTTCATTCCCC	38	33	41	1	2	40	28	4	17	8	11	80	22
AGATCATCTGGCAGTTTCACC	miR167	not found	miR167	mdm-miR167aMIMAT0025922,mdm-miR167a		AGATCATCTGGCAGTTTCACC	0	0	0	0	0	0	7	0	0	0	0	0	21
GGTCATGCTCTGACAGCCTCACT	miR167	miR167	miR167	aly-miR167b-3p		GGTCATGCTCTGACAGCCTCACT	5	0	0	0	0	0	0	0	0	0	3	0	23
TGAAGCTGCCAGCATGATCT	not found	miR167	miR167	bna-miR167d,lja-miR167a,lja-miR167b,lja-miR167c,gba-miR167a,gba-miR167b,gba-miR167c		TGAAGCTGCCAGCATGATCT	51	44	42	0	81	18	24	23	0	32	50	41	20
TGAAGCTGCCAGCATGATCTA	miR167	miR167	miR167	mdm-miR167gMIMAT0025928,mdm-miR167cMIMAT0025924,mdm-miR167bMIMAT0025923,mdm-miR167fMIMAT0025927,mdm-miR167eMIMAT0025926,mdm-miR167dMIMAT0025925,aly-miR167a-5p,aly-miR167b-5p,ath-miR167a,ath-miR167b,bdi-miR167a,bdi-miR167b,bdi-miR167f,bna-miR167c,bra-miR167a,bra-miR167b,bra-miR167c,bra-miR167d,cme-miR167a,cme-miR167b,cpa-miR167a,cpa-miR167b,dpr-miR167a,dpr-miR167b,gma-miR167a,gma-miR167b,gma-miR16…		TGAAGCTGCCAGCATGATCTA	982	552	418	316	414	282	901	291	1246	382	497	224	21
TGAAGCTGCCAGCATGATCTAA	miR167	miR167	miR167	bna-miR167a,bna-miR167b		TGAAGCTGCCAGCATGATCTAA	0	6	0	0	13	0	8	0	8	8	15	0	22
TGAAGCTGCCAGCATGATCTAG	miR167	miR167	miR167	ghr-miR167c,gba-miR167k,gba-miR167l,gba-miR167m,gba-miR167n		TGAAGCTGCCAGCATGATCTAG	5	0	6	0	0	0	0	0	14	0	0	0	22
TGAAGCTGCCAGCATGATCTC	miR167	miR167	miR167	lus-miR167a,vvi-miR167c		TGAAGCTGCCAGCATGATCTC	13	12	21	0	0	1	10	5	39	22	10	0	21
TGAAGCTGCCAGCATGATCTG	miR167	miR167	miR167	ath-miR167m,cme-miR167d,cme-miR167f,csi-miR167a,csi-miR167c,dpr-miR167c,gma-miR167c,gma-miR167j,gso-miR167a,ini-miR167,lja-miR167,lus-miR167f,lus-miR167g,lus-miR167i,mes-miR167a,mtr-miR167b-5p,osa-miR167d-5p,osa-miR167e-5p,osa-miR167f,osa-miR167g,osa-miR167h-5p,osa-miR167i-5p,osa-miR167j,ppl-miR167b,ptc-miR167e,pts-miR167,sbi-miR167c,sbi-miR167d,sbi-miR167e,sbi-miR167f,sbi-miR167g,sbi-miR167h,sit…		TGAAGCTGCCAGCATGATCTG	19	31	18	24	0	23	8	13	13	37	37	1	21
TGAAGCTGCCAGCATGATCTGA	miR167	miR167	miR167	bdi-miR167c-5p,bdi-miR167d-5p,bdi-miR167e-5p,bdi-miR167g,ccl-miR167a,ccl-miR167b,cpa-miR167d,ctr-miR167,gma-miR167g,mes-miR167d,mes-miR167e,mes-miR167f,ppe-miR167c,sit-miR167b-1,sit-miR167b-2,sit-miR167b-3,vun--miR167g		TGAAGCTGCCAGCATGATCTGA	273	175	169	82	163	94	187	56	227	59	105	32	22
TGAAGCTGCCAGCATGATCTGG	miR167	miR167	miR167	aly-miR167d-5p,ath-miR167d,cca-miR167,nta-miR167a,nta-miR167b,nta-miR167c,rco-miR167c,sit-miR167c,ghr-miR167a		TGAAGCTGCCAGCATGATCTGG	1	0	0	0	0	0	0	0	0	0	0	0	22
TGAAGCTGCCAGCATGATCTT	miR167	miR167	miR167	ahy-miR167-5p,cme-miR167c,cpa-miR167c,csi-miR167b,gma-miR167e,gma-miR167f,lus-miR167b,mes-miR167g,mes-miR167h,pco-miR167,ptc-miR167f-5p,ptc-miR167g-5p,tcc-miR167c,ghr-miR167b,gba-miR167o,gba-miR167p,gba-miR167q		TGAAGCTGCCAGCATGATCTT	31	25	17	0	16	21	20	16	35	6	11	25	21
TGAAGCTGCCAGCATGATCTTA	miR167	miR167	miR167	mdm-miR167jMIMAT0025931,mdm-miR167iMIMAT0025930,mdm-miR167hMIMAT0025929,mdm-miR167h,mdm-miR167i,mdm-miR167j,ppe-miR167d,vun-miR167f		TGAAGCTGCCAGCATGATCTTA	4	24	2	0	0	10	0	0	0	13	0	0	22
CCCGCCTTGCATCAACTGAAT	miR168	miR168	miR168	aly-miR168a-3p,bra-miR168b-3p,bra-miR168c-3p,mtr-miR168c-3p,ptc-miR168a-3p,ptc-miR168b-3p,sly-miR168b-3p		CCCGCCTTGCATCAACTGAAT	6	0	0	0	0	0	0	0	0	0	0	0	21
TCGCTTGGTGCAGGTCGGGA	not found	miR168	miR168	cme-miR168		TCGCTTGGTGCAGGTCGGGA	2	0	0	0	0	0	0	2	0	0	0	0	20
TCGCTTGGTGCAGGTCGGGAA	miR168	miR168	miR168	mdm-miR168bMIMAT0025933,mdm-miR168aMIMAT0025932,aly-miR168a-5p,aly-miR168b-5p,ath-miR168a,ath-miR168b,ath-miR168m,bna-miR168a,bra-miR168a-5p,cca-miR168a,ccl-miR168,crt-miR168,gma-miR168a,hte-miR168,lus-miR168a,lus-miR168b,mdm-miR168a,mdm-miR168b,mes-miR168a,mtr-miR168b,mtr-miR168c-5p,nta-miR168d,nta-miR168e,ppe-miR168,ptc-miR168a-5p,ptc-miR168b-5p,ptr-miR168,pts-miR168a,pts-miR168b,rco-miR168,tcc…		TCGCTTGGTGCAGGTCGGGAA	128	63	38	83	16	75	27	33	84	10	34	153	21
AACCAACAGAGAGGGGGTGATGTG	not found	not found	miR169	t05283376_x89		AACCAACAGAGAGGGGGTGATGTG	4	6	0	0	0	0	11	12	0	0	56	0	24
ACCCTCTTGACCGTTAGATTTGGC	not found	not found	miR169	t01818456_x151		ACCCTCTTGACCGTTAGATTTGGC	4	2	0	0	8	8	45	6	16	38	24	0	24
TAGCCAGGGATGACTTGCCT	not found	not found	miR169	mdm-miR169oMIMAT0043632		TAGCCAGGGATGACTTGCCT	5	0	0	0	0	0	0	0	0	0	0	0	20
TCGCTTGGTGCAGGTCGGG	not found	not found	miR169	gma-miR168b		TCGCTTGGTGCAGGTCGGG	4	0	0	0	0	0	0	0	14	0	0	0	19
TGAAGAGAAGAGCGTTGTTTGG	miR169	not found	miR169	mdm-miR169fMIMAT0026068,mdm-miR169eMIMAT0026067,mdm-miR169e,mdm-miR169f		TGAAGAGAAGAGCGTTGTTTGG	5	0	0	0	0	0	0	0	0	0	1	0	22
AGATTGAGCCGCGCCAATATC	miR171	miR170/171	miR170/171	lus-miR171a,lus-miR171f,mes-miR171e,mes-miR171f,mtr-miR171e-3p,ptc-miR171c,ptc-miR171d,rco-miR171g,tcc-miR171b,tcc-miR171c		AGATTGAGCCGCGCCAATATC	0	0	0	0	0	0	0	0	0	0	1	0	21
GGATTGAGCCGCGCCAATATC	miR171	miR170/171	miR170/171	ptc-miR171k		GGATTGAGCCGCGCCAATATC	0	0	0	0	0	0	0	1	0	0	0	0	21
TGATTGAGCCGCGCCAATAT	not found	miR170/171	miR170/171	zma-miR171a-3p		TGATTGAGCCGCGCCAATAT	0	0	0	0	0	0	0	0	0	0	2	0	20
TGATTGAGCCGCGCCAATATC	miR171	miR170/171	miR170/171	mdm-miR171eMIMAT0025942,mdm-miR171cMIMAT0025940,mdm-miR171dMIMAT0025941,ace-miR170a,ace-miR170b,ace-miR170c,ace-miR170d,ace-miR171a,ace-miR171b,ace-miR171c,aly-miR171a-3p,ath-miR170m,ath-miR170n,ath-miR171a,ath-miR171m,ath-miR171n,ath-miR171o,bdi-miR171a,bna-miR171f,bra-miR171e,ccl-miR171,cme-miR171a,cme-miR171e,cme-miR171g,gcl-miR171,mdm-miR171c,mdm-miR171d,mdm-miR171e,osa-miR171a,ppd-miR170,sbi…		TGATTGAGCCGCGCCAATATC	159	63	72	15	31	63	251	68	448	93	165	50	21
TGATTGAGCCGTGCCAATATC	miR171	miR170/171	miR170/171	mdm-miR171gMIMAT0025944,mdm-miR171hMIMAT0025945,aqc-miR171a,aqc-miR171b,aqc-miR171d,bdi-miR171b,bdi-miR171c-3p,bdi-miR171d-3p,bdi-miR171e,cme-miR171c,cme-miR171f,cpa-miR171a,cpa-miR171b,cpa-miR171c,cpa-miR171d,crt-miR171,far-miR171,gma-miR171e,gma-miR171f,gma-miR171g,gma-miR171j-3p,gma-miR171u,hpa-miR171a,htu-miR171b,htu-miR171c,hvu-miR171-3p,lja-miR171a,lus-miR171b,lus-miR171c,lus-miR171e,mdm-mi…		TGATTGAGCCGTGCCAATATC	0	0	0	0	8	0	0	2	0	0	0	0	21
CGATGTTGGTGAGGTTCAATC	miR171	not found	miR171	gma-miR171k-5p,gma-miR171l,lja-miR171d-3p,mtr-miR171e-5p		CGATGTTGGTGAGGTTCAATC	0	0	0	0	0	0	0	0	0	8	7	0	21
TGAGCCGAACCAATATCACTC	not found	miR171	miR171	mdm-miR171iMIMAT0025946,mdm-miR171i,sit-miR50-npr,stu-miR479		TGAGCCGAACCAATATCACTC	108	51	60	0	62	49	180	18	355	31	29	31	21
TGATTGAGCCGCGCCAATATCT	miR171	miR171	miR171	bna-miR171g		TGATTGAGCCGCGCCAATATCT	2	0	0	0	0	0	12	0	0	3	6	0	22
TGATTGAGCCGCGTCAATATC	miR171	miR171	miR171	cme-miR171h,lja-miR171b,lus-miR171g,lus-miR171j,mtr-miR171b,vvi-miR171b		TGATTGAGCCGCGTCAATATC	0	0	0	0	0	0	0	0	0	0	4	0	21
TTGAGCCGCGCCAATATCAC	not found	miR171	miR171	csi-miR171a,sly-miR171d		TTGAGCCGCGCCAATATCAC	0	0	0	0	0	0	5	3	0	0	0	0	20
TTGAGCCGCGCCAATATCACT	miR171	miR171	miR171	mdm-miR171jMIMAT0025947,mdm-miR171kMIMAT0025948,mdm-miR171lMIMAT0025949,gma-miR171k-3p,lja-miR171d-5p,mdm-miR171j,mdm-miR171k,mdm-miR171l,nta-miR171b,ppe-miR171b,ssl-miR171b,vun-miR171f,vvi-miR171f,ghr-miR171j,ghr-miR171k,gba-miR171d,gba-miR171e,gba-miR171f,gba-miR171g,gba-miR171h,gba-miR171i		TTGAGCCGCGCCAATATCACT	94	65	18	34	17	28	44	20	12	21	43	61	21
TTGAGCCGCGTCAATATCTCA	miR171	miR171	miR171	gma-miR171m,gma-miR171t,vun-miR171.2		TTGAGCCGCGTCAATATCTCA	2	1	0	0	1	2	2	0	4	0	0	0	21
TTGAGCCGCGTCAATATCTCC	miR171	miR171	miR171	mdm-miR171bMIMAT0025939,mdm-miR171aMIMAT0025938,mdm-miR171pMIMAT0043582,ctr-miR171,mdm-miR171a,mdm-miR171b,ppe-miR171h,sit-miR14-npr		TTGAGCCGCGTCAATATCTCC	5071	3051	2420	1808	1705	1519	8220	1426	10196	1652	2331	973	21
TTGAGCCGCGTCAATATCTCT	miR171	miR171	miR171	sly-miR171e,stu-miR171b-3p		TTGAGCCGCGTCAATATCTCT	0	0	0	0	0	2	0	0	4	1	3	0	21
TTGAGCCGTGCCAATATCAC	not found	miR171	miR171	osa-miRf10461-npr,zma-miR171b-3p		TTGAGCCGTGCCAATATCAC	10	0	6	0	14	8	0	1	0	0	2	0	20
TTGAGCCGTGCCAATATCACG	miR171	miR171	miR171	mdm-miR171f-3pMIMAT0025943,aly-miR171b-3p,aly-miR171c-3p,ath-miR171b,ath-miR171c,bna-miR171a,bna-miR171b,bna-miR171c,bna-miR171d,bna-miR171e,bol-miR171a,bra-miR171a,bra-miR171b,bra-miR171c,bra-miR171d,cme-miR171b,cme-miR171d,gma-miR171i-3p,lus-miR171i,mdm-miR171f,mes-miR171b,mes-miR171c,mtr-miR171f,ptc-miR171a-3p,ptc-miR171b,rco-miR171a,rco-miR171b,sly-miR171b,ssl-miR171a,stu-miR171d-3p,tae-miR17…		TTGAGCCGTGCCAATATCACG	2	3	0	0	0	2	17	0	2	4	0	0	21
AGAATCTTGATGATGCTGCAG	miR172	miR172	miR172	mdm-miR172mMIMAT0025964,mdm-miR172oMIMAT0025966,mdm-miR172nMIMAT0025965,aly-miR172c-3p,aly-miR172d-3p,aly-miR172f-3p,ath-miR172c,ath-miR172d,bna-miR172d,bra-miR172c-3p,cme-miR172e,lja-miR172a,mdm-miR172m,mdm-miR172n,mdm-miR172o,nta-miR172a,ghr-miR172e,ghr-miR172h,gba-miR172e,gba-miR172f,gba-miR172g,gba-miR172h,gba-miR172i		AGAATCTTGATGATGCTGCAG	14	21	19	0	13	12	40	10	53	14	4	0	21
AGAATCTTGATGATGCTGCAT	miR172	miR172	miR172	mdm-miR172gMIMAT0025958,mdm-miR172dMIMAT0025955,mdm-miR172pMIMAT0043620,mdm-miR172fMIMAT0025957,mdm-miR172hMIMAT0025959,mdm-miR172eMIMAT0025956,aly-miR172a-3p,aly-miR172b-3p,aqc-miR172a,ath-miR172a,ath-miR172b-3p,bdi-miR172a-3p,bna-miR172a,bol-miR172a,bol-miR172b,bra-miR172a,bra-miR172b-3p,cca-miR172,cme-miR172b,cme-miR172c,dpr-miR172a,dpr-miR172b,egu-miR172a,egu-miR172b,egu-miR172c,gma-miR172a,g…		AGAATCTTGATGATGCTGCAT	0	0	0	0	0	0	0	0	9	0	0	0	21
GGAATCTTGATGATGCTGCAG	miR172	miR172	miR172	mdm-miR172lMIMAT0025963,cme-miR172a,gma-miR172c,lus-miR172e,lus-miR172i,mdm-miR172l,mes-miR172e,mes-miR172f,ppe-miR172d,ptc-miR172g-3p,ptc-miR172h-3p,rco-miR172,stu-miR172d-3p,vun-miR172c.1,vun-miR172c.2,vvi-miR172c		GGAATCTTGATGATGCTGCAG	0	0	0	0	0	3	7	0	0	0	4	0	21
ACTAGGTTTGTTTATTTTGGGACG	miR1862	miR1862	miR1862	osa-miR1862d		ACTAGGTTTGTTTATTTTGGGACG	0	0	0	0	0	0	0	1	0	0	0	0	24
CTACCGATGCCACTAAGTCCCA	miR2118	not found	miR2118	mdm-miR2118bMIMAT0026035,mdm-miR2118cMIMAT0026036,mdm-miR2118aMIMAT0026034,mdm-miR2118a,mdm-miR2118b,mdm-miR2118c		CTACCGATGCCACTAAGTCCCA	662	750	332	206	255	270	441	159	952	341	562	162	22
GGCCGGGGGACGGGCTGGGA	not found	miR2911	miR2911	peu-miR2911		GGCCGGGGGACGGGCTGGGA	1	0	0	0	0	0	0	0	0	0	0	0	20
CATGGTGGTGACGGGTGACGGAG	not found	miR2914	miR2914	peu-miR2914		CATGGTGGTGACGGGTGACGGAG	0	0	0	0	16	0	0	0	0	0	0	0	23
ATCCAACGAAGCAGGAGCTGA	miR319	not found	miR319	mdm-miR319c-3pMIMAT0026058,mdm-miR319c		ATCCAACGAAGCAGGAGCTGA	1575	1120	803	862	1700	1216	1870	1056	2191	950	1019	1039	21
CTTGGACTGAAGGGAGCTCC	not found	miR319	miR319	ppt-miR319a,ppt-miR319b,sly-miR319a		CTTGGACTGAAGGGAGCTCC	2	1	13	0	1	10	30	10	32	0	9	36	20
CTTGGACTGAAGGGAGCTCCT	miR319	miR319	miR319	mes-miR319h		CTTGGACTGAAGGGAGCTCCT	650	303	309	302	283	440	1065	457	1072	329	361	433	21
TAGCTGCCGAGTCATTCATCCA	miR319	not found	miR319	ppe-miR319b		TAGCTGCCGAGTCATTCATCCA	0	0	7	0	0	0	6	0	0	0	0	0	22
TTGGACTGAAAGGAGCTCCT	not found	miR319	miR319	gma-miR319c		TTGGACTGAAAGGAGCTCCT	7	0	0	0	0	2	1	2	0	2	0	0	20
TTGGACTGAAGGGAGCTCCC	not found	miR319	miR319	cme-miR319a,cme-miR319b,ctr-miR319,gma-miR319a,gma-miR319b,gma-miR319e,ltu-miR319,lus-miR319b,mtr-miR319a-3p,mtr-miR319b-3p,ppe-miR319a,ptc-miR319a,ptc-miR319b,ptc-miR319c,ptc-miR319d,vun-miR319a.1,vun-miR319a.2		TTGGACTGAAGGGAGCTCCC	8608	5615	3726	7590	4119	4251	11904	2089	11514	3032	4200	4809	20
TTGGACTGAAGGGAGCTCCCA	miR319	miR319	miR319	mtr-miR319c-3p,vvi-miR319g		TTGGACTGAAGGGAGCTCCCA	12	1	4	3	7	8	2	5	5	0	2	1	21
TTGGACTGAAGGGAGCTCCCT	miR319	miR319	miR319	mdm-miR319aMIMAT0025967,mdm-miR319b-3pMIMAT0025968,aau-miR319,acb-miR159,aha-miR159,ahi-miR159,aly-miR319a-3p,aly-miR319b-3p,amg-miR319,ape-miR159,aqc-miR319,ath-miR319a,ath-miR319b,bra-miR319-3p,bvl-miR159,cca-miR319,cmi-miR159,cor-miR159,crb-miR159,dso-miR159,ech-miR159,fal-miR159,gma-miR319h,gma-miR319j,gma-miR319k,gma-miR319m,hbr-miR319,lus-miR319a,mdm-miR319a,mdm-miR319b,mes-miR319a,mes-miR3…		TTGGACTGAAGGGAGCTCCCT	16095	8992	6215	11823	8705	10212	13067	4492	12736	5444	6345	14185	21
TTGGACTGAAGGGAGCTCCT	not found	miR319	miR319	cme-miR319c,cme-miR319d,ppl-miR319,ptc-miR319e,ptc-miR319f,ptc-miR319g,ptc-miR319h,stu-miR319b		TTGGACTGAAGGGAGCTCCT	8799	4395	3501	3601	5734	6149	9300	4680	10121	4315	5479	6102	20
TTGGACTGAAGGGAGCTCCTT	miR319	miR319	miR319	aly-miR319c-3p,aly-miR319d-3p,ath-miR319c,mes-miR319f,mes-miR319g,pvu-miR319c,rco-miR319d,sly-miR319c-3p,ghr-miR319c		TTGGACTGAAGGGAGCTCCTT	42	13	42	44	15	20	104	25	135	35	38	79	21
TTGGACTGAAGGGAGCTCCTTC	miR319	miR319	miR319	gma-miR319g,gma-miR319l		TTGGACTGAAGGGAGCTCCTTC	0	0	0	0	0	0	0	0	0	0	4	28	22
TTGGACTGAAGGGTGCTCCC	not found	miR319	miR319	osa-miR319a-3p.2-3p,osa-miR319b,sbi-miR319a,sbi-miR319b,sof-miR319a,zma-miR319a-3p,zma-miR319b-3p,zma-miR319c-3p,zma-miR319d-3p		TTGGACTGAAGGGTGCTCCC	0	0	0	0	0	0	1	0	3	1	0	0	20
TTGGACTGAAGGGTGCTCCCT	miR319	miR319	miR319	bdi-miR319b-3p,sit-miR319-1,sit-miR319-2		TTGGACTGAAGGGTGCTCCCT	0	0	0	0	0	0	0	0	1	0	0	1	21
TTGGGCTGAAGGGAGCTCCC	not found	miR319	miR319	ptc-miR319i		TTGGGCTGAAGGGAGCTCCC	5	3	2	4	2	0	5	0	4	2	2	3	20
TTTTGGACTGAAGGGAGCTCC	miR319	miR319	miR319	gma-miR319p		TTTTGGACTGAAGGGAGCTCC	0	0	0	0	0	0	13	3	0	0	0	0	21
AAGCTCAGGAGGGATAGCACC	miR390	miR390	miR390	gma-miR390b-5p,gma-miR390d,nta-miR390a,sly-miR390a-5p,stu-miR390-5p,vun-miR390a.2		AAGCTCAGGAGGGATAGCACC	3	0	0	0	0	1	0	0	0	1	3	0	21
AAGCTCAGGAGGGATAGCGCC	miR390	miR390	miR390	mdm-miR390eMIMAT0025973,mdm-miR390aMIMAT0025969,mdm-miR390dMIMAT0025972,mdm-miR390cMIMAT0025971,mdm-miR390fMIMAT0025974,mdm-miR390bMIMAT0025970,aly-miR390a-5p,aly-miR390b-5p,ath-miR390a,ath-miR390b,bdi-miR390a-5p,bna-miR390a,bna-miR390b,bna-miR390c,bra-miR390-5p,cme-miR390a,cme-miR390b,cme-miR390c,cme-miR390d,cpa-miR390a,cpa-miR390b,csi-miR390,gma-miR390a-5p,gma-miR390f,gma-miR390g,hex-miR390a,he…		AAGCTCAGGAGGGATAGCGCC	297	191	161	79	85	216	215	171	294	480	710	560	21
AAGCTCAGGAGGGATAGCGTC	miR390	not found	miR390	cca-miR390		AAGCTCAGGAGGGATAGCGTC	0	0	0	0	0	0	1	0	0	1	0	0	21
AGCTCAGGAGGGATAGCGCC	not found	miR390	miR390	gma-miR390e		AGCTCAGGAGGGATAGCGCC	0	0	0	0	0	0	7	0	0	0	0	0	20
CGCTATCCATCCTGAGTTTCA	miR390	miR390	miR390	aly-miR390a-3p,lja-miR390a-3p,lja-miR390b-3p,sly-miR390b-3p,gba-miR390j		CGCTATCCATCCTGAGTTTCA	0	0	0	0	0	0	3	0	0	0	5	0	21
GAGCTCAGGAGGGATAGCGCC	miR390	miR390	miR390	ppt-miR390c-5p		GAGCTCAGGAGGGATAGCGCC	0	0	0	0	0	0	0	0	0	1	0	0	21
ATCATGCTATCCCTTTGGATT	miR393	not found	miR393	mdm-miR393gMIMAT0043583,mdm-miR393hMIMAT0043584,ptc-miR393a-3p,ptc-miR393b-3p,gba-miR393h,gba-miR393i,gba-miR393j,gba-miR393k		ATCATGCTATCCCTTTGGATT	0	0	0	0	0	0	0	0	5	0	3	0	21
TCCAAAGGGATCGCATTGATC	miR393	miR393	miR393	bdi-miR393a,bdi-miR393b-5p,bna-miR393,cme-miR393a,cme-miR393b,cme-miR393c,gma-miR393a,lus-miR393a,lus-miR393b,lus-miR393c,lus-miR393d,mtr-miR393a,mtr-miR393b-5p,osa-miR393a,ppe-miR393b,ptc-miR393a-5p,ptc-miR393b-5p,ptc-miR393c,rco-miR393,sbi-miR393a,sbi-miR393b,tcc-miR393b,vvi-miR393a,vvi-miR393b		TCCAAAGGGATCGCATTGATC	76	50	12	62	6	2	203	8	306	11	30	28	21
TCCAAAGGGATCGCATTGATCC	miR393	miR393	miR393	aly-miR393a-5p,aly-miR393b-5p,ath-miR393a,ath-miR393b,cpa-miR393,gma-miR393c,gma-miR393d,gma-miR393e,gma-miR393f,gma-miR393g,htu-miR393a,htu-miR393b,htu-miR393c,mes-miR393a,mes-miR393b,stu-miR393-5p,tcc-miR393a,vun-miR393a.1,vun-miR393a.2,zma-miR393b-5p,ghr-miR393c		TCCAAAGGGATCGCATTGATCC	3	0	0	0	0	0	0	0	0	0	0	0	22
TCCAAAGGGATCGCATTGATCT	miR393	miR393	miR393	mdm-miR393cMIMAT0025977,mdm-miR393bMIMAT0025976,mdm-miR393aMIMAT0025975,mdm-miR393a,mdm-miR393b,mdm-miR393c,mes-miR393c,mes-miR393d,osa-miR393b-5p,zma-miR393a-5p,zma-miR393c-5p,ghr-miR393f		TCCAAAGGGATCGCATTGATCT	779	591	382	394	423	371	725	134	779	179	272	347	22
TTGGCATTCTGTCCACCTCC	not found	miR394	miR394	mdm-miR394aMIMAT0025978,mdm-miR394bMIMAT0025979,ahy-miR394,aly-miR394a-5p,aly-miR394b-5p,ath-miR394a,ath-miR394b,bdi-miR394,bna-miR394a,bna-miR394b,cca-miR394,cme-miR394a,cme-miR394b,cpa-miR394a,cpa-miR394b,csi-miR394,gma-miR394a-5p,gma-miR394b-5p,gma-miR394c-5p,gma-miR394d,gma-miR394e,gma-miR394f,gma-miR394g,lus-miR394a,lus-miR394b,mdm-miR394a,mdm-miR394b,mes-miR394a,mes-miR394b,nta-miR394,osa-m…		TTGGCATTCTGTCCACCTCC	1169	1291	675	264	469	519	1270	196	1518	505	553	34	20
TTTGGCATTCTGTCCACCTCC	miR394	miR394	miR394	vun-miR394a.1,vun-miR394a.3		TTTGGCATTCTGTCCACCTCC	133	152	83	39	33	97	189	21	236	50	102	0	21
CTGAAGTGTTTGGGGGAACCC	miR395	not found	miR395	mdm-miR395lMIMAT0043626		CTGAAGTGTTTGGGGGAACCC	11	15	8	1	0	0	50	0	28	22	22	67	21
CTCAAGAAAGCTGTGGGAGA	not found	miR396	miR396	ptc-miR396e-3p		CTCAAGAAAGCTGTGGGAGA	154	77	46	29	45	16	254	22	524	109	113	2	20
GCTCAAGAAAGCTGTGGGAGA	miR396	miR396	miR396	gma-miR396b-3p,gma-miR396k,mtr-miR396a-3p,vun-miR396b*,ghr-miR396b,ghr-miR396c		GCTCAAGAAAGCTGTGGGAGA	14	0	0	0	0	6	8	0	15	1	3	0	21
GTTCAATAAAGCTGTGGGAAG	miR396	miR396	miR396	aly-miR396a-3p,gma-miR396i-3p,mtr-miR396b-3p,sly-miR396a-3p,ghr-miR396a,ghr-miR396d,ghr-miR396e,ghr-miR396f,ghr-miR396j		GTTCAATAAAGCTGTGGGAAG	220	84	56	74	61	88	180	45	254	40	133	217	21
TTCAATAAAGCTGTGGGAAG	not found	miR396	miR396	gma-miR396a-3p		TTCAATAAAGCTGTGGGAAG	557	295	242	524	283	279	1119	242	980	146	327	780	20
TTCCACAGCTTTCTTGAACGT	miR396	not found	miR396	ppe-miR396a		TTCCACAGCTTTCTTGAACGT	2	0	0	0	0	1	1	0	1	1	0	0	21
TTCCACAGCTTTCTTGAACT	not found	miR396	miR396	vvi-miR396b		TTCCACAGCTTTCTTGAACT	91	1	56	66	45	72	63	6	62	71	109	225	20
TTCCACAGCTTTCTTGAACTA	miR396	miR396	miR396	pab-miR396a,vvi-miR396a		TTCCACAGCTTTCTTGAACTA	4	1	0	0	0	11	0	0	0	1	0	0	21
TTCCACAGCTTTCTTGAACTG	miR396	miR396	miR396	mdm-miR396bMIMAT0025990,aau-miR396,aly-miR396a-5p,amg-miR396,aqc-miR396a,ath-miR396a,bcy-miR396a,bdi-miR396c-5p,bdi-miR396d-5p,bgy-miR396a,cme-miR396b,cpa-miR396,csi-miR396a,csi-miR396b,dpr-miR396,gma-miR396a-5p,gma-miR396i-5p,hbr-miR396b,lja-miR396,lus-miR396a,lus-miR396c,mdm-miR396b,mes-miR396a,mes-miR396b,mtr-miR396b-5p,nta-miR396a,osa-miR396a-5p,osa-miR396b-5p,ptc-miR396a,ptc-miR396b,sbi-miR3…		TTCCACAGCTTTCTTGAACTG	72	40	59	153	17	17	40	13	42	42	30	278	21
TTCCACAGCTTTCTTGAACTGT	miR396	miR396	miR396	gma-miR396e		TTCCACAGCTTTCTTGAACTGT	6	0	0	0	0	0	0	0	0	0	0	0	22
TTCCACAGCTTTCTTGAACTT	miR396	miR396	miR396	mdm-miR396dMIMAT0025992,mdm-miR396eMIMAT0025993,mdm-miR396cMIMAT0025991,aly-miR396b-5p,aqc-miR396b,ath-miR396b,avm-miR396-5p,bcy-miR396b,bdi-miR396e-5p,bgy-miR396b,bna-miR396a,bra-miR396-5p,cca-miR396a-5p,ccl-miR396,cme-miR396a,cme-miR396c,cme-miR396d,gma-miR396b-5p,gma-miR396c,lus-miR396b,lus-miR396e,mdm-miR396c,mdm-miR396d,mdm-miR396e,mes-miR396c,mes-miR396d,mes-miR396e,mes-miR396f,mtr-miR396a-…		TTCCACAGCTTTCTTGAACTT	5114	4280	2870	945	2399	2252	3182	1176	2682	1480	2327	2077	21
TTCCACGGCTTTCTTGAACC	not found	miR396	miR396	smo-miR396		TTCCACGGCTTTCTTGAACC	0	1	0	0	0	0	0	0	0	0	0	0	20
TTCCACGGCTTTCTTGAACTG	miR396	miR396	miR396	mdm-miR396gMIMAT0025995,mdm-miR396fMIMAT0025994,cme-miR396e,mdm-miR396f,mdm-miR396g,ptc-miR396f		TTCCACGGCTTTCTTGAACTG	339	312	122	483	142	234	200	101	132	77	65	622	21
TTCCACGGCTTTCTTGAACTT	miR396	miR396	miR396	pab-miR396b,pab-miR396c,ptc-miR396g-5p,tcc-miR396d,ghr-miR396i		TTCCACGGCTTTCTTGAACTT	36	21	1	0	15	13	37	4	13	18	17	1	21
TTCCATAGCTTTCTTGAACTG	not found	miR396	miR396	gcl-miR396b		TTCCATAGCTTTCTTGAACTG	0	1	0	0	0	0	0	0	0	0	0	0	21
TGTGTTCTCAGGTCACCCCTT	miR398	miR398	miR398	mdm-miR398aMIMAT0025998,aly-miR398a-3p,aqc-miR398a,ath-miR398a,bol-miR398a,cme-miR398b,csi-miR398,gma-miR398a,gma-miR398b,gra-miR398,mdm-miR398a,mtr-miR398a-3p,osa-miR398a,ptc-miR398a,rco-miR398a,tcc-miR398b,vvi-miR398a,ghr-miR398b,ghr-miR398c		TGTGTTCTCAGGTCACCCCTT	0	0	0	0	0	13	0	0	0	0	1	0	21
TGTGTTCTCAGGTCGCCCCTG	miR398	miR398	miR398	mdm-miR398cMIMAT0026000,mdm-miR398bMIMAT0025999,aqc-miR398b,bdi-miR398a,cca-miR398,cme-miR398a,gma-miR398c,gma-miR398d,lus-miR398a,mdm-miR398b,mdm-miR398c,mtr-miR398b,mtr-miR398c,nta-miR398,osa-miR398b,ppe-miR398a-3p,ptc-miR398b,ptc-miR398c-3p,rco-miR398b,tcc-miR398a,vvi-miR398b,vvi-miR398c,ghr-miR398a		TGTGTTCTCAGGTCGCCCCTG	7	0	0	32	33	0	9	10	0	22	0	0	21
TGCCAAAGGAGAATTGCCCTG	miR399	miR399	miR399	mdm-miR399cMIMAT0026003,mdm-miR399aMIMAT0026001,mdm-miR399bMIMAT0026002,bdi-miR399b,bdi-miR399c,csi-miR399c,csi-miR399e,gma-miR399i,lus-miR399b,lus-miR399d,mdm-miR399a,mdm-miR399b,mdm-miR399c,mes-miR399a,osa-miR399a,osa-miR399b,osa-miR399c,ptc-miR399f,ptc-miR399g,sbi-miR399a,sbi-miR399c,sbi-miR399h,sbi-miR399j,sit-miR399a-1,sit-miR399a-2,tcc-miR399g,vvi-miR399a,vvi-miR399h,zma-miR399a-3p,zma-miR3…		TGCCAAAGGAGAATTGCCCTG	0	0	0	0	0	0	1	0	0	0	0	0	21
TGCCAAAGGAGAGTTGCCCTG	miR399	miR399	miR399	mdm-miR399iMIMAT0026009,mdm-miR399jMIMAT0026010,aly-miR399b-3p,aly-miR399c-3p,ath-miR399b,ath-miR399c,csi-miR399d,gma-miR399a,gma-miR399b,gma-miR399c,gma-miR399h,mdm-miR399i,mdm-miR399j,mes-miR399f,mtr-miR399l,mtr-miR399p,osa-miR399d,pvu-miR399a,rco-miR399a,sbi-miR399d,sbi-miR399i,sit-miR399b-1,sit-miR399b-2,tcc-miR399i,vvi-miR399b,vvi-miR399c,zma-miR399e-3p,zma-miR399i-3p,zma-miR399j-3p,ghr-miR3…		TGCCAAAGGAGAGTTGCCCTG	42	28	24	29	52	20	78	3	53	17	23	0	21
TGCCAAAGGAGATTTGCTCGG	miR399	miR399	miR399	mdm-miR399gMIMAT0026007,mdm-miR399eMIMAT0026005,mdm-miR399hMIMAT0026008,mdm-miR399fMIMAT0026006,mdm-miR399e,mdm-miR399f,mdm-miR399g,mdm-miR399h,mes-miR399e,ppe-miR399m,ppe-miR399n		TGCCAAAGGAGATTTGCTCGG	0	0	0	0	0	0	0	0	0	0	4	0	21
TTAGATTCACGCACAAACTCG	miR403	miR403	miR403	mdm-miR403aMIMAT0026011,mdm-miR403bMIMAT0026012,aly-miR403a-3p,aly-miR403b-3p,ath-miR403,bna-miR403,bra-miR403-3p,bst-miR403,csi-miR403,har-miR403a,hpe-miR403a,htu-miR403a,htu-miR403b,htu-miR403c,htu-miR403d,htu-miR403e,mdm-miR403a,mdm-miR403b,mes-miR403a,mes-miR403b,ppe-miR403,ppl-miR403,ptc-miR403a,ptc-miR403b,ptc-miR403c-3p,ptc-miR403d,rco-miR403a,rco-miR403b,tcc-miR403a,tcc-miR403b,vvi-miR403…		TTAGATTCACGCACAAACTCG	474	427	275	127	487	393	331	233	431	171	198	411	21
TTAGATTCACGCACAAACTTG	miR403	miR403	miR403	gma-miR403a,gma-miR403b,vun-miR403		TTAGATTCACGCACAAACTTG	1	0	0	0	0	0	0	0	0	0	0	0	21
TGCACTGCCTCTTCCCTGGC	not found	miR408	miR408	gma-miR408d		TGCACTGCCTCTTCCCTGGC	0	0	0	0	0	0	8	0	0	0	0	0	20
TGCACTGCCTCTTCCCTGGCT	miR408	miR408	miR408	cca-miR408,nta-miR408,ppt-miR408b,stu-miR408b-3p		TGCACTGCCTCTTCCCTGGCT	0	0	0	0	0	0	0	0	9	0	0	0	21
AGCTGCTGACTCGTTGGTTCA	miR4414	miR4414	miR4414	mtr-miR4414a-5p		AGCTGCTGACTCGTTGGTTCA	953	596	409	1387	785	353	2786	743	4430	944	710	423	21
ACTCTCCCTCAAGGGCTTCGAC	mdm-miR477	miR473	miR473	mdm-miR477bMIMAT0026020,mdm-miR477b		ACTCTCCCTCAAGGGCTTCGAC	37	72	70	43	29	33	34	10	134	14	8	0	22
ACTCTCCCTCAAGAGCTTCTC	miR477	not found	miR477	mdm-miR477aMIMAT0026021,mdm-miR477		ACTCTCCCTCAAGAGCTTCTC	0	0	0	0	0	1	0	0	0	0	0	0	21
AGGAATGGGCTGTTTGGGAAGA	miR482	not found	miR482	mdm-miR482a-5pMIMAT0011164,mdm-miR482a-5p		AGGAATGGGCTGTTTGGGAAGA	31	39	8	50	67	26	45	67	66	35	15	0	22
GGAATTGGTGGATTGGAAAGC	miR482	not found	miR482	stu-miR482a-5p		GGAATTGGTGGATTGGAAAGC	0	8	0	0	0	0	0	0	0	0	0	0	21
TGTGGGTGGGGTGGAAAGATT	miR482	not found	miR482	sly-miR482e-5p		TGTGGGTGGGGTGGAAAGATT	8	9	0	0	0	0	0	0	20	0	0	0	21
AGACTACAATTATCTGATCA	not found	miR5083	miR5083	osa-miR5083		AGACTACAATTATCTGATCA	6	0	0	0	0	0	0	0	0	0	0	0	20
AGACCCGACGCGACTGACAGATAA	miR5141	miR5141	miR5141	rgl-miR5141		AGACCCGACGCGACTGACAGATAA	0	0	0	0	0	0	0	0	0	0	3	0	24
TGACAACGAGAGAGAGCACGC	miR535	miR535	miR535	mdm-miR535aMIMAT0026024,cpa-miR535,mdm-miR535a,osa-miR535-5p,pab-miR535,ppe-miR535a,ppt-miR535a,ppt-miR535b,ppt-miR535c,ppt-miR535d,rco-miR535,sit-miR535,vvi-miR535a,vvi-miR535b,vvi-miR535c		TGACAACGAGAGAGAGCACGC	3	0	0	0	0	0	0	0	0	13	3	0	21
TGACGACGAGAGAGAGCACGC	miR535	not found	miR535	mdm-miR535dMIMAT0026027,mdm-miR535d,ppe-miR535b		TGACGACGAGAGAGAGCACGC	273	159	126	38	138	202	279	80	430	82	174	0	21
ATGGGTAGCACAAGGATTAATG	miR6027	not found	miR6027	sly-miR6027-5p		ATGGGTAGCACAAGGATTAATG	0	8	0	0	0	0	0	0	0	0	0	0	22
CAGTCTGACAATATAACGTGC	miR7120-3p	not found	miR7120-3p	mdm-miR7120a-3pMIMAT0037472,mdm-miR7120b-3pMIMAT0037473		CAGTCTGACAATATAACGTGC	3802	2716	1897	2017	2106	1638	5383	1107	7134	1991	2282	1099	21
TTATACAGAGAAATCACGGTCG	miR7122	not found	miR7122	mdm-miR7122aMIMAT0026048,mdm-miR7122bMIMAT0026049,mdm-miR7122a,mdm-miR7122b		TTATACAGAGAAATCACGGTCG	39	8	0	69	11	21	41	3	44	41	19	57	22
TTATACAATGAAATCACGGCCG	miR7122a-5p	not found	miR7122a-5p	ppe-miR7122a-5p		TTATACAATGAAATCACGGCCG	0	0	0	0	0	0	0	0	20	0	0	0	22
CGAACTTATTGCAACTAGCTT	miR7125	not found	miR7125	mdm-miR7125MIMAT0026059,mdm-miR7125,ppe-miR7125-3p		CGAACTTATTGCAACTAGCTT	17	24	9	0	0	0	0	0	18	1	6	0	21
ACACTGAAGGACCTAAACTAAC	miR840	miR840	miR840	ath-miR840		ACACTGAAGGACCTAAACTAAC	0	0	0	0	0	0	0	0	14	0	0	0	22
CTCGTTGTCTGTTCGACCTTG	miR858	not found	miR858	ppe-miR858		CTCGTTGTCTGTTCGACCTTG	31	0	16	0	21	4	71	12	156	97	81	74	21
TTCGTTGTCTGTTCGACCTTG	miR858	miR858	miR858	ath-miR858b		TTCGTTGTCTGTTCGACCTTG	1935	1055	755	733	718	484	3502	696	4812	1173	1143	602	21
TTTCGTTGTCTGTTCGACCTT	miR858	miR858	miR858	aly-miR858-5p,ath-miR858a		TTTCGTTGTCTGTTCGACCTT	0	0	0	0	31	0	14	4	48	0	6	0	21
CATCGGAATCTGTTACTGTTTC	miR947	miR947	miR947	pde-miR947,pta-miR947		CATCGGAATCTGTTACTGTTTC	0	0	0	0	0	0	5	0	0	0	0	0	22
GATTTCGGACCAGGCTTCATTCC	miR166	miRf10034-akr	miRf10034-akr	ptc-miRf10034-akr		GATTTCGGACCAGGCTTCATTCC	0	0	0	0	0	0	0	0	0	9	0	0	23
TTTCGGACCAGGCTTCATTCC	not found	miRf10034-akr	miRf10034-akr	sit-miR05-npr		TTTCGGACCAGGCTTCATTCC	915	619	466	1310	480	526	464	172	428	229	324	843	21
ATTGGACTGAAGGGAGCTCC	not found	miRf10576-akr	miRf10576-akr	cpa-miR319		ATTGGACTGAAGGGAGCTCC	153	46	87	188	99	87	301	194	301	170	130	259	20
AAAATTTGATTCAACGGCTAAAGT	not found	not found	new	t01903391_x2585		AAAATTTGATTCAACGGCTAAAGT	220	154	159	252	309	306	94	248	97	189	221	336	24
AAATAATTTCTGACTGTACGATGT	not found	not found	new	t05771720_x1275		AAATAATTTCTGACTGTACGATGT	121	73	80	37	122	85	117	52	13	185	263	127	24
AAATGATTTCTGATTGCACGATGT	not found	not found	new	t10504083_x340		AAATGATTTCTGATTGCACGATGT	24	6	33	0	28	14	52	16	1	113	53	0	24
AAATTAAAATTAAGGTCGTTTAGT	not found	not found	new	t10640946_x109		AAATTAAAATTAAGGTCGTTTAGT	9	0	14	0	0	13	10	11	11	4	6	31	24
AACGACCTAGATCCTCGAACTTGG	not found	not found	new	t06850069_x720		AACGACCTAGATCCTCGAACTTGG	58	60	42	0	69	58	52	47	43	82	97	112	24
AACGGAACTTTGCGCTACGCAGAC	not found	not found	new	t09667785_x135		AACGGAACTTTGCGCTACGCAGAC	13	15	7	0	10	0	10	12	22	35	11	0	24
AACTCAAATCTCGACTCAATCTAT	not found	not found	new	t11029067_x213		AACTCAAATCTCGACTCAATCTAT	25	45	0	0	47	29	11	15	0	10	31	0	24
AACCTGGCTCTGATACCA	not found	not found	new	ghr-miR5139a,ghr-miR5139b,ghr-miR5139c,ghr-miR5139d,ghr-miR5139e,ghr-miR5139f		AACCTGGCTCTGATACCA	0	0	8	0	0	0	0	0	0	0	0	0	18
AAGAGATTCGAGCTGTTGAAATTT	not found	not found	new	t02367433_x954		AAGAGATTCGAGCTGTTGAAATTT	72	70	31	72	126	98	48	70	81	101	162	23	24
AAGTGAGTTTTGTGTGGATGTTTC	not found	not found	new	t06991240_x100		AAGTGAGTTTTGTGTGGATGTTTC	0	0	0	0	27	2	16	0	20	10	25	0	24
AAGTGTAGAATGAAATTTTTGGAG	not found	not found	new	t02106445_x448		AAGTGTAGAATGAAATTTTTGGAG	37	16	39	0	35	63	25	58	27	40	72	36	24
AATCACATCTGTTTATCGTACATC	not found	not found	new	t07028158_x271		AATCACATCTGTTTATCGTACATC	18	16	27	0	0	39	1	19	28	53	70	0	24
AATCCTCCGCGTTATGACAAATTC	not found	not found	new	t08011676_x176		AATCCTCCGCGTTATGACAAATTC	10	10	6	0	36	12	16	26	13	25	22	0	24
AATCGTATTCGTTCATTGTATATC	not found	not found	new	t06556507_x395		AATCGTATTCGTTCATTGTATATC	15	28	17	83	14	19	43	37	44	52	43	0	24
AATCGTGATCGCACAAATAAGAGG	not found	not found	new	t05550832_x116		AATCGTGATCGCACAAATAAGAGG	11	0	0	0	12	3	11	3	19	21	12	24	24
AATGACTAAACGATCTTTGATTTG	not found	not found	new	t03534717_x131		AATGACTAAACGATCTTTGATTTG	7	22	5	0	38	12	13	0	32	1	1	0	24
AATTGACAATATGAGGAGTAGCCT	not found	not found	new	t10632002_x109		AATTGACAATATGAGGAGTAGCCT	0	11	6	29	12	8	0	5	14	11	13	0	24
ACATGCTTATTTCCTATTAGTGAC	not found	not found	new	t06353578_x159		ACATGCTTATTTCCTATTAGTGAC	13	0	12	0	7	10	10	8	35	35	11	18	24
ACCTGAAGCTAGTGAACTCCCAAA	not found	not found	new	t10206945_x214		ACCTGAAGCTAGTGAACTCCCAAA	32	12	8	0	26	30	30	11	31	7	27	0	24
ACCTTTCTCGACTGCTAATTCACC	not found	not found	new	t02685408_x293		ACCTTTCTCGACTGCTAATTCACC	20	27	0	46	46	16	14	30	46	28	20	0	24
ACGGACAGAAATTAACAAGGGTGT	not found	not found	new	t10652667_x948		ACGGACAGAAATTAACAAGGGTGT	81	68	104	0	129	72	62	115	19	119	141	38	24
ACGGTGATAAATAGGGTAGTGAGC	not found	not found	new	t00205877_x43290		ACGGTGATAAATAGGGTAGTGAGC	4542	4228	2452	3395	6078	3965	5462	4213	3514	1333	2023	2085	24
ACGTGAACCATTGAATTTTGATCC	not found	not found	new	t01874561_x357		ACGTGAACCATTGAATTTTGATCC	33	14	15	30	37	16	14	15	0	81	57	45	24
ACTCCAAAAATCTCGTTGTGCACT	not found	not found	new	t01842693_x170		ACTCCAAAAATCTCGTTGTGCACT	26	10	17	0	29	15	20	17	17	6	13	0	24
ACTCTCTTGACCGTTAGATTTGGC	not found	not found	new	t04687649_x448		ACTCTCTTGACCGTTAGATTTGGC	28	18	35	0	21	56	47	44	17	42	96	44	24
ACTCTCTTGACTGTTGGATTTGGC	not found	not found	new	t04788679_x173		ACTCTCTTGACTGTTGGATTTGGC	8	12	4	0	11	16	16	16	0	16	23	51	24
AGAAGTGTAGAATGAGATTTTTGA	not found	not found	new	t06573334_x1024		AGAAGTGTAGAATGAGATTTTTGA	73	97	65	109	72	121	48	116	64	117	142	0	24
AGCGAGAATTGAACCTAAGACCTC	not found	not found	new	t04875777_x605		AGCGAGAATTGAACCTAAGACCTC	50	19	32	44	37	58	25	35	0	31	53	221	24
AGCGTAGAATGAGATTTTTGGAGT	not found	not found	new	t01670841_x1399		AGCGTAGAATGAGATTTTTGGAGT	102	130	128	158	136	186	97	124	94	78	133	33	24
AGCTGTTGGATCAAATTTTAAAGG	not found	not found	new	t05823672_x511		AGCTGTTGGATCAAATTTTAAAGG	49	28	26	0	59	35	31	53	49	60	63	58	24
AGGACTCGTTTTAGCCCTCTGGCC	not found	not found	new	t00557558_x407		AGGACTCGTTTTAGCCCTCTGGCC	25	29	10	0	66	51	10	24	37	80	47	28	24
AGGAGTGTGTGAGAAGTAAAAAGG	not found	not found	new	t01282844_x8805		AGGAGTGTGTGAGAAGTAAAAAGG	558	879	456	405	830	784	772	725	288	612	1613	883	24
AGGAGTGTGTGAGAAGTAAAATGA	not found	not found	new	t05783125_x3045		AGGAGTGTGTGAGAAGTAAAATGA	288	216	134	139	325	241	238	250	251	216	523	224	24
AGGGATCAATGAAGCTAGACCATT	not found	not found	new	t02898270_x354		AGGGATCAATGAAGCTAGACCATT	42	37	40	1	17	27	0	19	16	28	28	99	24
AGGGATTGTGTTTTTGTAGTTATC	not found	not found	new	t07940529_x426		AGGGATTGTGTTTTTGTAGTTATC	40	22	7	0	34	14	58	17	84	57	49	44	24
AGGGCTATAGGGCCAAAGAGAGCC	not found	not found	new	t11305484_x494		AGGGCTATAGGGCCAAAGAGAGCC	39	58	70	0	14	40	54	28	14	59	77	41	24
AGTAAAAAAAGGTGTGTGGATAGC	not found	not found	new	t08559171_x429		AGTAAAAAAAGGTGTGTGGATAGC	34	12	7	6	145	37	58	38	0	24	30	38	24
AGTAAAAAGATGTGTGTGGATAGC	not found	not found	new	t06292294_x2452		AGTAAAAAGATGTGTGTGGATAGC	205	112	94	113	266	225	207	200	63	254	404	309	24
AGTAAAATGGAGTGTGTGGATAAC	not found	not found	new	t07733140_x2002		AGTAAAATGGAGTGTGTGGATAAC	151	135	34	142	301	116	209	141	191	209	275	98	24
AGTAAAATGGGATGTGTGGATAAC	not found	not found	new	t03612591_x1494		AGTAAAATGGGATGTGTGGATAAC	187	81	55	60	122	140	172	122	161	79	210	105	24
AGTAAAATGGGGTATGTGGATATC	not found	not found	new	t01640484_x552		AGTAAAATGGGGTATGTGGATATC	50	23	12	33	24	44	33	52	48	37	85	111	24
AGTAAAATGGGGTGTGTAGATAGC	not found	not found	new	t05833725_x3129		AGTAAAATGGGGTGTGTAGATAGC	233	192	181	397	374	173	404	213	128	244	462	128	24
AGTAAAATTGGGTGTGTGGATAGC	not found	not found	new	t07990011_x1485		AGTAAAATTGGGTGTGTGGATAGC	135	134	65	151	216	96	163	64	81	71	169	140	24
AGAATCTTGATGATGCTGC	not found	not found	new	stu-miR172c-3p		AGAATCTTGATGATGCTGC	0	0	0	0	0	0	8	0	13	0	5	0	19
AGTAATTTGGGGTGTGTAGATAGC	not found	not found	new	t02485382_x1275		AGTAATTTGGGGTGTGTAGATAGC	102	99	51	51	120	58	196	73	105	82	212	126	24
AGTAATTTGGGGTGTGTGGATATC	not found	not found	new	t05317198_x857		AGTAATTTGGGGTGTGTGGATATC	58	52	45	39	145	55	122	64	107	58	77	35	24
AGTATTTGAAGGTAAAGTGGATGA	not found	not found	new	t04441452_x81		AGTATTTGAAGGTAAAGTGGATGA	11	0	0	1	0	2	18	1	0	0	2	46	24
AGTGATCTAGATTTTTGAAATTTG	not found	not found	new	t05614578_x77		AGTGATCTAGATTTTTGAAATTTG	2	0	0	0	18	17	0	6	0	0	7	27	24
AGTGTAGAATAAGAATTTTGGAGT	not found	not found	new	t04296158_x1721		AGTGTAGAATAAGAATTTTGGAGT	170	111	83	91	230	166	177	172	40	153	191	137	24
AGTGTAGAATGAAATTTTTAGAGT	not found	not found	new	t01876328_x736		AGTGTAGAATGAAATTTTTAGAGT	114	106	63	40	62	41	56	46	11	65	74	58	24
AGTGTAGAATGAGATATTTGGAGT	not found	not found	new	t11423816_x2591		AGTGTAGAATGAGATATTTGGAGT	303	170	187	148	287	225	162	288	93	167	307	254	24
AGTGTAGAATGAGATGTTTGGAGT	not found	not found	new	t01416056_x386		AGTGTAGAATGAGATGTTTGGAGT	33	56	46	0	36	34	17	24	2	73	27	38	24
AGTGTAGAATGATATTTTTGGAGT	not found	not found	new	t08618829_x1482		AGTGTAGAATGATATTTTTGGAGT	130	145	135	102	176	98	140	103	76	135	131	111	24
AGTGTAGAATGTGATTTTTGGAGT	not found	not found	new	t07792803_x3305		AGTGTAGAATGTGATTTTTGGAGT	302	335	226	128	277	231	376	311	177	241	337	364	24
AGTGTAGGATGAGATTTTTGGAGT	not found	not found	new	t07028129_x2201		AGTGTAGGATGAGATTTTTGGAGT	243	281	138	305	242	63	195	152	207	64	155	156	24
ATAAAAGTTTAGGGGGTAATCGGC	not found	not found	new	t07750091_x210		ATAAAAGTTTAGGGGGTAATCGGC	12	0	7	35	34	0	11	19	35	10	12	35	24
ATAGAATGAGATTTTTGGAGTGCC	not found	not found	new	t00123765_x612		ATAGAATGAGATTTTTGGAGTGCC	62	59	12	41	69	54	39	72	18	27	79	80	24
ATAGTAATTGTTGACATATGTTGG	not found	not found	new	t10939657_x114		ATAGTAATTGTTGACATATGTTGG	5	0	10	42	7	0	25	10	0	12	3	0	24
ATATTCGTTCATCGTACATCGTGC	not found	not found	new	t01565772_x621		ATATTCGTTCATCGTACATCGTGC	37	33	0	0	73	45	86	23	56	103	96	69	24
ATCAAATTTCAACAGTCCGGATCC	not found	not found	new	t01047916_x221		ATCAAATTTCAACAGTCCGGATCC	11	12	3	31	46	12	31	11	19	29	16	0	24
ATCAAATTTCAAGGGTCCGGATCT	not found	not found	new	t10123212_x367		ATCAAATTTCAAGGGTCCGGATCT	20	25	13	32	54	35	27	31	0	40	23	67	24
ATCCAGACCGTTGAAATTTGATCC	not found	not found	new	t06508800_x1328		ATCCAGACCGTTGAAATTTGATCC	115	114	100	53	216	151	115	99	99	98	96	72	24
ATCCCGTGATCGTGACCGTTCATC	not found	not found	new	t00370463_x599		ATCCCGTGATCGTGACCGTTCATC	72	13	32	34	95	34	7	21	9	55	87	140	24
ATCCGGACCGTTCAAATTTAATCC	not found	not found	new	t11389257_x121		ATCCGGACCGTTCAAATTTAATCC	1	34	5	0	0	12	7	9	0	34	19	0	24
ATCCGTACCGTTGAAATTTGATCC	not found	not found	new	t05218660_x3185		ATCCGTACCGTTGAAATTTGATCC	368	213	247	24	401	275	183	268	115	461	441	189	24
ATCCGTGCCATTGAAATTTGATCC	not found	not found	new	t11067480_x144		ATCCGTGCCATTGAAATTTGATCC	11	10	0	0	0	39	2	16	0	31	10	25	24
ATCCGTGCCGTTGAAATTTGATCC	not found	not found	new	t05565673_x5938		ATCCGTGCCGTTGAAATTTGATCC	643	578	378	194	592	597	427	551	294	849	590	245	24
ATCCGTGGACTTTGGTGGAAGAGA	not found	not found	new	t01354282_x300		ATCCGTGGACTTTGGTGGAAGAGA	17	72	27	36	0	41	41	4	6	10	46	0	24
ATCCTCAAATCGTGTCTGTTCATC	not found	not found	new	t00403975_x734		ATCCTCAAATCGTGTCTGTTCATC	43	44	1	67	36	20	41	92	41	125	129	95	24
ATCCTCACATCTTAATCGTTCATC	not found	not found	new	t02471057_x202		ATCCTCACATCTTAATCGTTCATC	24	18	9	0	55	11	5	19	0	29	32	0	24
ATCCTCCAATCACGTTCGTTCATC	not found	not found	new	t09488478_x2305		ATCCTCCAATCACGTTCGTTCATC	271	275	133	36	339	238	208	182	103	274	203	43	24
ATCTCCCTTTCTGTATCTCTCACA	not found	not found	new	t08287422_x116		ATCTCCCTTTCTGTATCTCTCACA	19	24	3	0	26	2	30	1	0	3	8	0	24
ATCTGAGCCCTTGAAATTTGATCC	not found	not found	new	t02547976_x244		ATCTGAGCCCTTGAAATTTGATCC	30	14	11	0	33	36	25	21	20	42	12	0	24
ATCTTTCTTGACTGCTAACTCGCC	not found	not found	new	t07508544_x212		ATCTTTCTTGACTGCTAACTCGCC	13	31	4	0	23	15	46	8	31	29	12	0	24
ATGAGATGAGGAGGGTAGACAATC	not found	not found	new	t04263949_x1210		ATGAGATGAGGAGGGTAGACAATC	121	145	76	134	106	97	105	73	39	95	127	92	24
ATGAGATGGGGAGGGTAGACAATC	not found	not found	new	t02032016_x131		ATGAGATGGGGAGGGTAGACAATC	8	0	9	0	20	15	7	32	10	3	26	1	24
ATGAGATTTTTGGAGTGCTAATAT	not found	not found	new	t03152981_x166		ATGAGATTTTTGGAGTGCTAATAT	7	12	17	0	32	22	23	4	18	26	5	0	24
ATGGGTCGTTGGATGAAAATTCAA	not found	not found	new	t04716517_x1427		ATGGGTCGTTGGATGAAAATTCAA	146	212	75	61	116	107	110	120	138	49	75	218	24
ATGTCAATTGATTAGGTGTATGGT	not found	not found	new	t10560101_x554		ATGTCAATTGATTAGGTGTATGGT	48	29	23	33	32	36	59	74	34	80	96	10	24
ATGTCATTTCGGGCTATTTTCGGC	not found	not found	new	t00682504_x188		ATGTCATTTCGGGCTATTTTCGGC	25	0	0	47	13	22	29	9	0	5	38	0	24
ATGTGACTGTCCACATCAAATGCC	not found	not found	new	t05068025_x1057		ATGTGACTGTCCACATCAAATGCC	117	57	66	0	148	117	70	62	114	110	113	83	24
ATGTGACTGTCCACATCAGATGCC	not found	not found	new	t10979650_x916		ATGTGACTGTCCACATCAGATGCC	66	67	48	51	53	65	77	69	32	124	196	68	24
ATTGAATGTCGGCTAGCCTTACCC	not found	not found	new	t06472806_x220		ATTGAATGTCGGCTAGCCTTACCC	15	68	1	0	0	25	15	27	0	19	50	0	24
ATTGACGTTAAACTGTGAGGTGAC	not found	not found	new	t07284661_x745		ATTGACGTTAAACTGTGAGGTGAC	62	38	52	69	52	60	76	37	75	101	89	34	24
ATTGATTGTGGACAAACTCGGGGA	not found	not found	new	t03815957_x697		ATTGATTGTGGACAAACTCGGGGA	47	66	35	113	64	26	21	33	0	23	28	241	24
ATTGTAGAATGAGATTTTTGGAGT	not found	not found	new	t07356962_x2229		ATTGTAGAATGAGATTTTTGGAGT	217	122	135	85	213	257	140	185	82	252	340	201	24
ATTTGGTGGATTAGGAGAAAGGGA	not found	not found	new	t03040179_x446		ATTTGGTGGATTAGGAGAAAGGGA	25	19	18	0	20	17	33	56	52	64	79	63	24
ATTTTGTCCAAGTTGAAGGTTACT	not found	not found	new	t04233781_x84		ATTTTGTCCAAGTTGAAGGTTACT	1	0	0	31	0	7	0	0	0	0	0	45	24
CATCGGGCCGTTCAAATTTTATC	not found	not found	new	t01579770_x124		CATCGGGCCGTTCAAATTTTATC	17	42	8	0	0	7	18	4	0	19	9	0	23
GAGAAATGGAATAAATAATGGTAC	not found	not found	new	t07666879_x274		GAGAAATGGAATAAATAATGGTAC	24	27	7	0	38	39	22	19	61	11	26	0	24
GATAAAAAATGAACGGCCTGATGG	not found	not found	new	t06370387_x812		GATAAAAAATGAACGGCCTGATGG	70	88	94	0	124	49	61	37	30	96	122	41	24
GATGAACGGACACAATTTGAGGAT	not found	not found	new	t01796028_x211		GATGAACGGACACAATTTGAGGAT	7	0	9	0	42	14	16	17	14	4	8	80	24
GGTGTAGAATGAGATTTTTGAAGT	not found	not found	new	t11405782_x495		GGTGTAGAATGAGATTTTTGAAGT	19	38	40	63	69	31	81	55	35	24	40	0	24
GGTGTAGAATGAGATTTTTGGAGT	not found	not found	new	t05988915_x1147		GGTGTAGAATGAGATTTTTGGAGT	110	92	112	221	120	61	94	71	120	62	54	30	24
GTGTCTGAGAGGTAAAAAGGGGTG	not found	not found	new	t00969484_x10829		GTGTCTGAGAGGTAAAAAGGGGTG	922	854	542	624	1543	1159	1435	1327	996	394	687	346	24
GTTTTTGAATGAAAGGCTCATGTG	not found	not found	new	t01163329_x11463		GTTTTTGAATGAAAGGCTCATGTG	975	534	402	603	1358	1025	1621	963	1244	1060	1114	564	24
GTTTTTGAATGGAAGACTCATGTG	not found	not found	new	t10212079_x3461		GTTTTTGAATGGAAGACTCATGTG	332	93	95	153	464	327	619	291	509	231	260	87	24
TGCCTCCATTTAATTGTCACGACC	not found	not found	new	t01106153_x1640		TGCCTCCATTTAATTGTCACGACC	210	145	126	74	189	82	143	72	339	143	117	0	24
TTCCTTCGTGACTAATCCATCTTC	not found	not found	new	t03271250_x5800		TTCCTTCGTGACTAATCCATCTTC	749	852	713	80	313	464	849	256	724	320	327	153	24
AAAGTATCAAGGAGCGCAAAG	not found	not found	new	mdm-miR7126-5pMIMAT0026060,mdm-miR7126		AAAGTATCAAGGAGCGCAAAG	202	173	112	43	153	149	254	96	240	150	289	86	21
AAATGAGCGGAGTGGAAAGAA	not found	not found	new	t10036822_x303		AAATGAGCGGAGTGGAAAGAA	0	0	1	0	15	7	0	4	26	51	54	145	21
AGCTGCCGACTCATTCACTC	not found	not found	new	t03187209_x304		AGCTGCCGACTCATTCACTC	12	112	29	0	39	12	21	44	13	6	16	0	20
ATACGATGTGGTGGTTGATGG	not found	not found	new	t05186586_x137		ATACGATGTGGTGGTTGATGG	9	0	5	0	5	2	33	7	0	20	14	42	21
ATCGTCGTCTTGGCTGTCCAC	not found	not found	new	t04866336_x5364		ATCGTCGTCTTGGCTGTCCAC	521	448	397	237	386	382	776	245	738	387	479	368	21
CACTTGCTCCCCTTCTCCAAC	not found	not found	new	t08515395_x8579		CACTTGCTCCCCTTCTCCAAC	820	1121	545	1462	501	549	1016	322	1443	152	237	411	21
CAGGGAAGAGGTAGAGCATGG	not found	not found	new	t10644006_x200		CAGGGAAGAGGTAGAGCATGG	8	7	14	68	0	2	42	3	18	32	6	0	21
CATTGGACTGAAGGGAGCTCC	not found	not found	new	ptc-miRf10576-akr		CATTGGACTGAAGGGAGCTCC	0	11	0	0	0	0	0	1	0	10	3	0	21
CATTTGGCATCTCTTTTTCGT	not found	not found	new	t03370487_x77		CATTTGGCATCTCTTTTTCGT	12	0	9	0	11	5	0	1	25	2	12	0	21
CGGATCCCGCCTTGCATCAAC	not found	not found	new	t04954913_x13904		CGGATCCCGCCTTGCATCAAC	1660	1108	860	1331	1113	1026	1410	645	1277	642	972	1860	21
CTTGCATATCTCAGGAGCTGC	not found	not found	new	t05229383_x4081		CTTGCATATCTCAGGAGCTGC	417	341	136	140	207	160	1002	144	1009	178	196	151	21
GAATTCCTTCTCCTCTCCTTT	not found	not found	new	mdm-miR159cMIMAT0026053,mdm-miR159c		GAATTCCTTCTCCTCTCCTTT	158	196	89	118	37	59	198	40	128	143	171	290	21
GCCGGCCGGGGGACGGACTGGG	not found	not found	new	ghr-miR2911		GCCGGCCGGGGGACGGACTGGG	14	8	10	0	0	0	0	0	0	0	0	0	22
GGAATGGGCTGTTTGGGATG	not found	not found	new	ppe-miR482c-5p		GGAATGGGCTGTTTGGGATG	0	0	1	0	0	0	0	0	0	0	0	0	20
TAAGTTCATCCAAACACCATA	not found	not found	new	mdm-miR11011bMIMAT0043630		TAAGTTCATCCAAACACCATA	89	75	59	0	36	21	83	6	219	30	57	0	21
TAGTTGGTGGAGCGATTTGTC	not found	not found	new	peu-miR2910		TAGTTGGTGGAGCGATTTGTC	861	525	254	429	391	507	1931	293	2291	396	645	662	21
TATATGGAGGGAAATATGGTG	not found	not found	new	t11329296_x5768		TATATGGAGGGAAATATGGTG	54	38	25	37	14	15	574	111	388	968	1273	2271	21
TCAGATGGTAGAAAGGATGCAA	not found	not found	new	t00614980_x824		TCAGATGGTAGAAAGGATGCAA	120	60	24	104	36	51	153	16	130	16	40	74	22
TCCTCATTCTTCGTCTTCCTTC	not found	not found	new	t07833554_x78		TCCTCATTCTTCGTCTTCCTTC	0	14	16	0	11	2	24	0	11	0	0	0	22
TCGCAGGAGAGATGGCACTA	not found	not found	new	mdm-miR3627bMIMAT0026017,mdm-miR3627cMIMAT0026018,mdm-miR3627aMIMAT0026016,mdm-miR3627a,mdm-miR3627b,mdm-miR3627c		TCGCAGGAGAGATGGCACTA	26	0	20	35	0	14	0	0	0	1	9	0	20
TCGGACCAGGCTTCATTCTC	not found	not found	new	cme-miR166i		TCGGACCAGGCTTCATTCTC	3	0	0	1	2	0	0	0	0	1	3	1	20
TCTTCCCAACACCTCCCATACC	not found	not found	new	ghr-miR482b,ghr-miR482e		TCTTCCCAACACCTCCCATACC	0	0	0	0	0	0	1	1	0	0	0	0	22
TGACAGAAGAGAGTGAGTAC	not found	not found	new	hci-miR156a		TGACAGAAGAGAGTGAGTAC	0	0	0	0	0	0	0	0	1	0	0	0	20
TGGTATCGTTTCTGTAGGTTT	not found	not found	new	t02782125_x1861		TGGTATCGTTTCTGTAGGTTT	184	106	121	187	196	126	332	85	334	97	93	0	21
TTAATTAGGTGTATGGTGAGC	not found	not found	new	t01962011_x583		TTAATTAGGTGTATGGTGAGC	84	48	24	42	39	36	196	14	23	18	59	0	21
TTCCACAGCTTTCTTGAACAG	not found	not found	new	mdm-miR396aMIMAT0025989,mdm-miR396a		TTCCACAGCTTTCTTGAACAG	784	580	422	619	254	405	517	175	479	149	267	510	21
TTGGACCAGGCTTCATTCCCC	not found	not found	new	mes-miR166i,ghr-miR166i,gba-miR166aa,gba-miR166ab		TTGGACCAGGCTTCATTCCCC	455	289	213	357	194	218	258	130	190	125	173	592	21
TTGGATAAAAAATGAACGGTC	not found	not found	new	t05533652_x933		TTGGATAAAAAATGAACGGTC	61	69	55	0	62	55	138	45	102	112	123	111	21
TTGGATCAGGCTTCATTCCCC	not found	not found	new	t09078889_x1129		TTGGATCAGGCTTCATTCCCC	223	139	114	106	69	78	135	31	83	27	56	68	21
TTTGTAGCCGTTGGATTTTTATC	not found	not found	new	t08065896_x105		TTTGTAGCCGTTGGATTTTTATC	5	14	0	0	24	0	23	3	23	0	13	0	23
TTGTCGCATGAGAGATGGTAC	not found	not found	new	t08517492_x488		TTGTCGCATGAGAGATGGTAC	43	45	64	24	14	21	40	21	189	8	19	0	21
GGACCAGGCTTCATTCCCC	not found	not found	new	cpa-miR166e		GGACCAGGCTTCATTCCCC	777	476	448	573	351	369	521	165	464	238	335	748	19
GTCGTTGTAGTATAGTGG	not found	not found	new	gma-miR6300		GTCGTTGTAGTATAGTGG	6	0	0	0	17	0	0	0	0	0	7	0	18
TCCCCACGGTCGGCGCCA	not found	not found	new	bdi-miR5054		TCCCCACGGTCGGCGCCA	0	0	3	0	0	0	0	0	0	0	0	0	18
TCCCCAGTGGAGTCGCCA	not found	not found	new	ghr-miR5072b,ghr-miR5072c		TCCCCAGTGGAGTCGCCA	0	0	9	0	0	0	0	0	0	0	0	0	18
TCGGACCAGGCTTCATTCC	not found	not found	new	hbr-miR166a,pde-miR166a,pde-miR166b,vvi-miR166a,vvi-miR166b		TCGGACCAGGCTTCATTCC	343	291	303	291	197	166	437	128	342	242	436	903	19
TTAGATTCACGCACAAACT	not found	not found	new	gba-miR403a,gba-miR403b		TTAGATTCACGCACAAACT	25	44	36	0	1	29	31	0	34	8	30	26	19
TTCCACAGCTTTCTTGAA	not found	not found	new	gba-miR396c,gba-miR396d,gba-miR396e,gba-miR396f,gba-miR396g,gba-miR396h		TTCCACAGCTTTCTTGAA	0	0	0	0	0	0	0	0	0	6	6	0	18
TTGGACTGAAGGGAGCTCC	not found	not found	new	pta-miR319		TTGGACTGAAGGGAGCTCC	223	77	81	269	111	149	249	78	463	73	129	117	19

## Sheet: Blast miRbase
# BLASTN 2.10.1+
# Query: mdm_miRNA1
# Database: /home/leclercqj/Apple/mature_MirBase.fadb
# Fields: query acc.ver, subject acc.ver, % identity, alignment length, mismatches, gap opens, q. start, q. end, s. start, s. end, evalue, bit score
# 50 hits found
mdm_miRNA1	aof-miR166d	100.000	21	0	0	1	21	1	21	4.38e-06	39.2
mdm_miRNA1	cas-miR166f-3p	100.000	21	0	0	1	21	1	21	4.38e-06	39.2
mdm_miRNA1	cas-miR166d	100.000	21	0	0	1	21	1	21	4.38e-06	39.2
mdm_miRNA1	cas-miR166c-3p	100.000	21	0	0	1	21	1	21	4.38e-06	39.2
mdm_miRNA1	pab-miR166i	100.000	21	0	0	1	21	1	21	4.38e-06	39.2
mdm_miRNA1	pab-miR166h	100.000	21	0	0	1	21	1	21	4.38e-06	39.2
mdm_miRNA1	pab-miR166g	100.000	21	0	0	1	21	1	21	4.38e-06	39.2
mdm_miRNA1	pab-miR166f	100.000	21	0	0	1	21	1	21	4.38e-06	39.2
mdm_miRNA1	fve-miR166f	100.000	21	0	0	1	21	1	21	4.38e-06	39.2
mdm_miRNA1	fve-miR166c	100.000	21	0	0	1	21	1	21	4.38e-06	39.2
mdm_miRNA1	fve-miR166d-3p	100.000	21	0	0	1	21	1	21	4.38e-06	39.2
mdm_miRNA1	fve-miR166b	100.000	21	0	0	1	21	1	21	4.38e-06	39.2
mdm_miRNA1	fve-miR166a	100.000	21	0	0	1	21	1	21	4.38e-06	39.2
mdm_miRNA1	fve-miR166e	100.000	21	0	0	1	21	1	21	4.38e-06	39.2
mdm_miRNA1	lja-miR166-3p	100.000	21	0	0	1	21	4	24	4.38e-06	39.2
mdm_miRNA1	mdm-miR166j	100.000	21	0	0	1	21	1	21	4.38e-06	39.2
mdm_miRNA1	eun-miR166-3p	100.000	21	0	0	1	21	1	21	4.38e-06	39.2
mdm_miRNA1	vca-miR166c-3p	100.000	21	0	0	1	21	1	21	4.38e-06	39.2
mdm_miRNA1	vca-miR166b-3p	100.000	21	0	0	1	21	1	21	4.38e-06	39.2
mdm_miRNA1	vca-miR166a-3p	100.000	21	0	0	1	21	1	21	4.38e-06	39.2
mdm_miRNA1	ata-miR166d-3p	100.000	21	0	0	1	21	1	21	4.38e-06	39.2
mdm_miRNA1	ata-miR166b-3p	100.000	21	0	0	1	21	1	21	4.38e-06	39.2
mdm_miRNA1	ata-miR166e-3p	100.000	21	0	0	1	21	1	21	4.38e-06	39.2
mdm_miRNA1	ata-miR166a-3p	100.000	21	0	0	1	21	1	21	4.38e-06	39.2
mdm_miRNA1	atr-miR166d	100.000	21	0	0	1	21	1	21	4.38e-06	39.2
mdm_miRNA1	atr-miR166c	100.000	21	0	0	1	21	1	21	4.38e-06	39.2
mdm_miRNA1	atr-miR166a	100.000	21	0	0	1	21	1	21	4.38e-06	39.2
mdm_miRNA1	lus-miR166k	100.000	21	0	0	1	21	1	21	4.38e-06	39.2
mdm_miRNA1	lus-miR166j	100.000	21	0	0	1	21	1	21	4.38e-06	39.2
mdm_miRNA1	cpa-miR166c	100.000	21	0	0	1	21	1	21	4.38e-06	39.2
mdm_miRNA1	cpa-miR166b	100.000	21	0	0	1	21	1	21	4.38e-06	39.2
mdm_miRNA1	cpa-miR166a	100.000	21	0	0	1	21	1	21	4.38e-06	39.2
mdm_miRNA1	ppe-miR166e	100.000	21	0	0	1	21	1	21	4.38e-06	39.2
mdm_miRNA1	ppe-miR166d	100.000	21	0	0	1	21	1	21	4.38e-06	39.2
mdm_miRNA1	ppe-miR166c	100.000	21	0	0	1	21	1	21	4.38e-06	39.2
mdm_miRNA1	ppe-miR166b	100.000	21	0	0	1	21	1	21	4.38e-06	39.2
mdm_miRNA1	ppe-miR166a	100.000	21	0	0	1	21	1	21	4.38e-06	39.2
mdm_miRNA1	aly-miR166h-3p	100.000	21	0	0	1	21	1	21	4.38e-06	39.2
mdm_miRNA1	stu-miR166d-3p	100.000	21	0	0	1	21	1	21	4.38e-06	39.2
mdm_miRNA1	stu-miR166c-3p	100.000	21	0	0	1	21	1	21	4.38e-06	39.2
mdm_miRNA1	stu-miR166a-3p	100.000	21	0	0	1	21	1	21	4.38e-06	39.2
mdm_miRNA1	ssp-miR166	100.000	21	0	0	1	21	1	21	4.38e-06	39.2
mdm_miRNA1	bdi-miR166i-3p	100.000	21	0	0	1	21	1	21	4.38e-06	39.2
mdm_miRNA1	mes-miR166g	100.000	21	0	0	1	21	1	21	4.38e-06	39.2
mdm_miRNA1	mes-miR166f	100.000	21	0	0	1	21	1	21	4.38e-06	39.2
mdm_miRNA1	mes-miR166e	100.000	21	0	0	1	21	1	21	4.38e-06	39.2
mdm_miRNA1	mes-miR166d	100.000	21	0	0	1	21	1	21	4.38e-06	39.2
mdm_miRNA1	mes-miR166c	100.000	21	0	0	1	21	1	21	4.38e-06	39.2
mdm_miRNA1	mes-miR166b	100.000	21	0	0	1	21	1	21	4.38e-06	39.2
mdm_miRNA1	mes-miR166a	100.000	21	0	0	1	21	1	21	4.38e-06	39.2
# BLASTN 2.10.1+
# Query: mdm_miRNA2
# Database: /home/leclercqj/Apple/mature_MirBase.fadb
# Fields: query acc.ver, subject acc.ver, % identity, alignment length, mismatches, gap opens, q. start, q. end, s. start, s. end, evalue, bit score
# 30 hits found
mdm_miRNA2	aof-miR159	100.000	21	0	0	1	21	1	21	4.38e-06	39.2
mdm_miRNA2	fve-miR159a-3p	100.000	21	0	0	1	21	1	21	4.38e-06	39.2
mdm_miRNA2	mdm-miR159f	100.000	21	0	0	1	21	1	21	4.38e-06	39.2
mdm_miRNA2	mdm-miR159e	100.000	21	0	0	1	21	1	21	4.38e-06	39.2
mdm_miRNA2	mdm-miR159d	100.000	21	0	0	1	21	1	21	4.38e-06	39.2
mdm_miRNA2	vca-miR159-3p	100.000	21	0	0	1	21	1	21	4.38e-06	39.2
mdm_miRNA2	atr-miR159	100.000	21	0	0	1	21	1	21	4.38e-06	39.2
mdm_miRNA2	cpa-miR159a	100.000	21	0	0	1	21	1	21	4.38e-06	39.2
mdm_miRNA2	ppe-miR159	100.000	21	0	0	1	21	1	21	4.38e-06	39.2
mdm_miRNA2	mes-miR159b	100.000	21	0	0	1	21	1	21	4.38e-06	39.2
mdm_miRNA2	cme-miR159a	100.000	21	0	0	1	21	1	21	4.38e-06	39.2
mdm_miRNA2	htu-miR159a	100.000	21	0	0	1	21	1	21	4.38e-06	39.2
mdm_miRNA2	hbr-miR159a	100.000	21	0	0	1	21	1	21	4.38e-06	39.2
mdm_miRNA2	nta-miR159	100.000	21	0	0	1	21	1	21	4.38e-06	39.2
mdm_miRNA2	mes-miR159a-3p	100.000	21	0	0	1	21	1	21	4.38e-06	39.2
mdm_miRNA2	gma-miR159e-3p	100.000	21	0	0	1	21	1	21	4.38e-06	39.2
mdm_miRNA2	csi-miR159a-3p	100.000	21	0	0	1	21	1	21	4.38e-06	39.2
mdm_miRNA2	ahy-miR159	100.000	21	0	0	1	21	1	21	4.38e-06	39.2
mdm_miRNA2	aly-miR159a-3p	100.000	21	0	0	1	21	1	21	4.38e-06	39.2
mdm_miRNA2	rco-miR159	100.000	21	0	0	1	21	1	21	4.38e-06	39.2
mdm_miRNA2	pvu-miR159a.1	100.000	21	0	0	1	21	1	21	4.38e-06	39.2
mdm_miRNA2	mtr-miR159a	100.000	21	0	0	1	21	1	21	4.38e-06	39.2
mdm_miRNA2	bra-miR159a	100.000	21	0	0	1	21	1	21	4.38e-06	39.2
mdm_miRNA2	sly-miR159	100.000	21	0	0	1	21	1	21	4.38e-06	39.2
mdm_miRNA2	vvi-miR159c	100.000	21	0	0	1	21	1	21	4.38e-06	39.2
mdm_miRNA2	bna-miR159	100.000	21	0	0	1	21	1	21	4.38e-06	39.2
mdm_miRNA2	ptc-miR159b	100.000	21	0	0	1	21	1	21	4.38e-06	39.2
mdm_miRNA2	ptc-miR159a	100.000	21	0	0	1	21	1	21	4.38e-06	39.2
mdm_miRNA2	gma-miR159a-3p	100.000	21	0	0	1	21	1	21	4.38e-06	39.2
mdm_miRNA2	ath-miR159a	100.000	21	0	0	1	21	1	21	4.38e-06	39.2
# BLASTN 2.10.1+
# Query: mdm_miRNA3
# Database: /home/leclercqj/Apple/mature_MirBase.fadb
# Fields: query acc.ver, subject acc.ver, % identity, alignment length, mismatches, gap opens, q. start, q. end, s. start, s. end, evalue, bit score
# 1 hits found
mdm_miRNA3	mdm-miR1511	100.000	21	0	0	1	21	1	21	4.38e-06	39.2
# BLASTN 2.10.1+
# Query: mdm_miRNA4
# Database: /home/leclercqj/Apple/mature_MirBase.fadb
# Fields: query acc.ver, subject acc.ver, % identity, alignment length, mismatches, gap opens, q. start, q. end, s. start, s. end, evalue, bit score
# 1 hits found
mdm_miRNA4	mdm-miR482b	100.000	22	0	0	1	22	1	22	1.43e-06	41.0
# BLASTN 2.10.1+
# Query: mdm_miRNA5
# Database: /home/leclercqj/Apple/mature_MirBase.fadb
# Fields: query acc.ver, subject acc.ver, % identity, alignment length, mismatches, gap opens, q. start, q. end, s. start, s. end, evalue, bit score
# 36 hits found
mdm_miRNA5	aof-miR319a	100.000	21	0	0	1	21	1	21	4.38e-06	39.2
mdm_miRNA5	bra-miR319-3p	100.000	21	0	0	1	21	1	21	4.38e-06	39.2
mdm_miRNA5	sly-miR319b	100.000	21	0	0	1	21	1	21	4.38e-06	39.2
mdm_miRNA5	stu-miR319a-3p	100.000	21	0	0	1	21	1	21	4.38e-06	39.2
mdm_miRNA5	mtr-miR319d-3p	100.000	21	0	0	1	21	1	21	4.38e-06	39.2
mdm_miRNA5	mes-miR319e	100.000	21	0	0	1	21	1	21	4.38e-06	39.2
mdm_miRNA5	mes-miR319d	100.000	21	0	0	1	21	1	21	4.38e-06	39.2
mdm_miRNA5	mes-miR319c	100.000	21	0	0	1	21	1	21	4.38e-06	39.2
mdm_miRNA5	mes-miR319b	100.000	21	0	0	1	21	1	21	4.38e-06	39.2
mdm_miRNA5	mes-miR319a	100.000	21	0	0	1	21	1	21	4.38e-06	39.2
mdm_miRNA5	mdm-miR319b-3p	100.000	21	0	0	1	21	1	21	4.38e-06	39.2
mdm_miRNA5	mdm-miR319a	100.000	21	0	0	1	21	1	21	4.38e-06	39.2
mdm_miRNA5	hbr-miR319	100.000	21	0	0	1	21	1	21	4.38e-06	39.2
mdm_miRNA5	nta-miR319b	100.000	21	0	0	1	21	1	21	4.38e-06	39.2
mdm_miRNA5	nta-miR319a	100.000	21	0	0	1	21	1	21	4.38e-06	39.2
mdm_miRNA5	lus-miR319a	100.000	21	0	0	1	21	1	21	4.38e-06	39.2
mdm_miRNA5	cca-miR319	100.000	21	0	0	1	21	1	21	4.38e-06	39.2
mdm_miRNA5	vun-miR319a	100.000	21	0	0	1	21	1	21	4.38e-06	39.2
mdm_miRNA5	amg-miR319	100.000	21	0	0	1	21	1	21	4.38e-06	39.2
mdm_miRNA5	aau-miR319	100.000	21	0	0	1	21	1	21	4.38e-06	39.2
mdm_miRNA5	gma-miR319m	100.000	21	0	0	1	21	1	21	4.38e-06	39.2
mdm_miRNA5	gma-miR319k	100.000	21	0	0	1	21	1	21	4.38e-06	39.2
mdm_miRNA5	gma-miR319j	100.000	21	0	0	1	21	1	21	4.38e-06	39.2
mdm_miRNA5	gma-miR319h	100.000	21	0	0	1	21	1	21	4.38e-06	39.2
mdm_miRNA5	tae-miR319	100.000	21	0	0	1	21	1	21	4.38e-06	39.2
mdm_miRNA5	aly-miR319b-3p	100.000	21	0	0	1	21	1	21	4.38e-06	39.2
mdm_miRNA5	aly-miR319a-3p	100.000	21	0	0	1	21	1	21	4.38e-06	39.2
mdm_miRNA5	rco-miR319c	100.000	21	0	0	1	21	1	21	4.38e-06	39.2
mdm_miRNA5	rco-miR319b	100.000	21	0	0	1	21	1	21	4.38e-06	39.2
mdm_miRNA5	rco-miR319a	100.000	21	0	0	1	21	1	21	4.38e-06	39.2
mdm_miRNA5	aqc-miR319	100.000	21	0	0	1	21	1	21	4.38e-06	39.2
mdm_miRNA5	vvi-miR319f	100.000	21	0	0	1	21	1	21	4.38e-06	39.2
mdm_miRNA5	vvi-miR319c	100.000	21	0	0	1	21	1	21	4.38e-06	39.2
mdm_miRNA5	vvi-miR319b	100.000	21	0	0	1	21	1	21	4.38e-06	39.2
mdm_miRNA5	ath-miR319b	100.000	21	0	0	1	21	1	21	4.38e-06	39.2
mdm_miRNA5	ath-miR319a	100.000	21	0	0	1	21	1	21	4.38e-06	39.2
# BLASTN 2.10.1+
# Query: mdm_miRNA6
# Database: /home/leclercqj/Apple/mature_MirBase.fadb
# Fields: query acc.ver, subject acc.ver, % identity, alignment length, mismatches, gap opens, q. start, q. end, s. start, s. end, evalue, bit score
# 1 hits found
mdm_miRNA6	mdm-miR482c	100.000	22	0	0	1	22	1	22	1.43e-06	41.0
# BLASTN 2.10.1+
# Query: mdm_miRNA7
# Database: /home/leclercqj/Apple/mature_MirBase.fadb
# 0 hits found
# BLASTN 2.10.1+
# Query: mdm_miRNA8
# Database: /home/leclercqj/Apple/mature_MirBase.fadb
# 0 hits found
# BLASTN 2.10.1+
# Query: mdm_miRNA9
# Database: /home/leclercqj/Apple/mature_MirBase.fadb
# 0 hits found
# BLASTN 2.10.1+
# Query: mdm_miRNA10
# Database: /home/leclercqj/Apple/mature_MirBase.fadb
# Fields: query acc.ver, subject acc.ver, % identity, alignment length, mismatches, gap opens, q. start, q. end, s. start, s. end, evalue, bit score
# 1 hits found
mdm_miRNA10	mdm-miR482d	100.000	21	0	0	1	21	1	21	4.38e-06	39.2
# BLASTN 2.10.1+
# Query: mdm_miRNA11
# Database: /home/leclercqj/Apple/mature_MirBase.fadb
# Fields: query acc.ver, subject acc.ver, % identity, alignment length, mismatches, gap opens, q. start, q. end, s. start, s. end, evalue, bit score
# 50 hits found
mdm_miRNA11	csi-miR396f-5p	100.000	21	0	0	1	21	1	21	4.38e-06	39.2
mdm_miRNA11	cas-miR396b	100.000	21	0	0	1	21	1	21	4.38e-06	39.2
mdm_miRNA11	pab-miR396h	100.000	21	0	0	1	21	1	21	4.38e-06	39.2
mdm_miRNA11	pab-miR396g	100.000	21	0	0	1	21	1	21	4.38e-06	39.2
mdm_miRNA11	fve-miR396b-5p	100.000	21	0	0	1	21	1	21	4.38e-06	39.2
mdm_miRNA11	ata-miR396c-5p	100.000	21	0	0	1	21	1	21	4.38e-06	39.2
mdm_miRNA11	bra-miR396-5p	100.000	21	0	0	1	21	1	21	4.38e-06	39.2
mdm_miRNA11	sly-miR396b	100.000	21	0	0	1	21	1	21	4.38e-06	39.2
mdm_miRNA11	atr-miR396e	100.000	21	0	0	1	21	1	21	4.38e-06	39.2
mdm_miRNA11	atr-miR396c	100.000	21	0	0	1	21	1	21	4.38e-06	39.2
mdm_miRNA11	atr-miR396b	100.000	21	0	0	1	21	1	21	4.38e-06	39.2
mdm_miRNA11	lus-miR396e	100.000	21	0	0	1	21	1	21	4.38e-06	39.2
mdm_miRNA11	ppe-miR396b	100.000	21	0	0	1	21	1	21	4.38e-06	39.2
mdm_miRNA11	stu-miR396-5p	100.000	21	0	0	1	21	1	21	4.38e-06	39.2
mdm_miRNA11	ama-miR396-5p	100.000	21	0	0	1	21	1	21	4.38e-06	39.2
mdm_miRNA11	mes-miR396f	100.000	21	0	0	1	21	1	21	4.38e-06	39.2
mdm_miRNA11	mes-miR396e	100.000	21	0	0	1	21	1	21	4.38e-06	39.2
mdm_miRNA11	mes-miR396d	100.000	21	0	0	1	21	1	21	4.38e-06	39.2
mdm_miRNA11	mes-miR396c	100.000	21	0	0	1	21	1	21	4.38e-06	39.2
mdm_miRNA11	cme-miR396d	100.000	21	0	0	1	21	1	21	4.38e-06	39.2
mdm_miRNA11	cme-miR396c	100.000	21	0	0	1	21	1	21	4.38e-06	39.2
mdm_miRNA11	cme-miR396a	100.000	21	0	0	1	21	1	21	4.38e-06	39.2
mdm_miRNA11	mdm-miR396e	100.000	21	0	0	1	21	1	21	4.38e-06	39.2
mdm_miRNA11	mdm-miR396d	100.000	21	0	0	1	21	1	21	4.38e-06	39.2
mdm_miRNA11	mdm-miR396c	100.000	21	0	0	1	21	1	21	4.38e-06	39.2
mdm_miRNA11	nta-miR396c	100.000	21	0	0	1	21	1	21	4.38e-06	39.2
mdm_miRNA11	nta-miR396b	100.000	21	0	0	1	21	1	21	4.38e-06	39.2
mdm_miRNA11	lus-miR396b	100.000	21	0	0	1	21	1	21	4.38e-06	39.2
mdm_miRNA11	cca-miR396a-5p	100.000	21	0	0	1	21	1	21	4.38e-06	39.2
mdm_miRNA11	gma-miR396k-5p	100.000	21	0	0	1	21	1	21	4.38e-06	39.2
mdm_miRNA11	bdi-miR396e-5p	100.000	21	0	0	1	21	1	21	4.38e-06	39.2
mdm_miRNA11	tcc-miR396e	100.000	21	0	0	1	21	1	21	4.38e-06	39.2
mdm_miRNA11	tcc-miR396c	100.000	21	0	0	1	21	1	21	4.38e-06	39.2
mdm_miRNA11	bcy-miR396b	100.000	21	0	0	1	21	1	21	4.38e-06	39.2
mdm_miRNA11	bgy-miR396b	100.000	21	0	0	1	21	1	21	4.38e-06	39.2
mdm_miRNA11	aly-miR396b-5p	100.000	21	0	0	1	21	1	21	4.38e-06	39.2
mdm_miRNA11	rco-miR396	100.000	21	0	0	1	21	1	21	4.38e-06	39.2
mdm_miRNA11	ccl-miR396	100.000	21	0	0	1	21	1	21	4.38e-06	39.2
mdm_miRNA11	zma-miR396f-5p	100.000	21	0	0	1	21	1	21	4.38e-06	39.2
mdm_miRNA11	zma-miR396e-5p	100.000	21	0	0	1	21	1	21	4.38e-06	39.2
mdm_miRNA11	aqc-miR396b	100.000	21	0	0	1	21	1	21	4.38e-06	39.2
mdm_miRNA11	gma-miR396c	100.000	21	0	0	1	21	1	21	4.38e-06	39.2
mdm_miRNA11	pta-miR396	100.000	21	0	0	1	21	1	21	4.38e-06	39.2
mdm_miRNA11	bna-miR396a	100.000	21	0	0	1	21	1	21	4.38e-06	39.2
mdm_miRNA11	mtr-miR396a-5p	100.000	21	0	0	1	21	1	21	4.38e-06	39.2
mdm_miRNA11	ptc-miR396e-5p	100.000	21	0	0	1	21	1	21	4.38e-06	39.2
mdm_miRNA11	ptc-miR396d	100.000	21	0	0	1	21	1	21	4.38e-06	39.2
mdm_miRNA11	ptc-miR396c	100.000	21	0	0	1	21	1	21	4.38e-06	39.2
mdm_miRNA11	gma-miR396b-5p	100.000	21	0	0	1	21	1	21	4.38e-06	39.2
mdm_miRNA11	sbi-miR396c	100.000	21	0	0	1	21	1	21	4.38e-06	39.2
# BLASTN 2.10.1+
# Query: mdm_miRNA12
# Database: /home/leclercqj/Apple/mature_MirBase.fadb
# Fields: query acc.ver, subject acc.ver, % identity, alignment length, mismatches, gap opens, q. start, q. end, s. start, s. end, evalue, bit score
# 10 hits found
mdm_miRNA12	aof-miR171c	100.000	21	0	0	1	21	1	21	4.38e-06	39.2
mdm_miRNA12	csi-miR171g-3p	100.000	21	0	0	1	21	1	21	4.38e-06	39.2
mdm_miRNA12	csi-miR171e-3p	100.000	21	0	0	1	21	1	21	4.38e-06	39.2
mdm_miRNA12	fve-miR171h	100.000	21	0	0	1	21	1	21	4.38e-06	39.2
mdm_miRNA12	mdm-miR171p	100.000	21	0	0	1	21	1	21	4.38e-06	39.2
mdm_miRNA12	mdm-miR171b	100.000	21	0	0	1	21	1	21	4.38e-06	39.2
mdm_miRNA12	mdm-miR171a	100.000	21	0	0	1	21	1	21	4.38e-06	39.2
mdm_miRNA12	ppe-miR171h	100.000	21	0	0	1	21	1	21	4.38e-06	39.2
mdm_miRNA12	mes-miR171a	100.000	21	0	0	1	21	1	21	4.38e-06	39.2
mdm_miRNA12	ctr-miR171	100.000	21	0	0	1	21	1	21	4.38e-06	39.2
# BLASTN 2.10.1+
# Query: mdm_miRNA14
# Database: /home/leclercqj/Apple/mature_MirBase.fadb
# 0 hits found
# BLASTN 2.10.1+
# Query: mdm_miRNA15
# Database: /home/leclercqj/Apple/mature_MirBase.fadb
# Fields: query acc.ver, subject acc.ver, % identity, alignment length, mismatches, gap opens, q. start, q. end, s. start, s. end, evalue, bit score
# 2 hits found
mdm_miRNA15	mdm-miR7120b-3p	100.000	21	0	0	1	21	1	21	4.38e-06	39.2
mdm_miRNA15	mdm-miR7120a-3p	100.000	21	0	0	1	21	1	21	4.38e-06	39.2
# BLASTN 2.10.1+
# Query: mdm_miRNA16
# Database: /home/leclercqj/Apple/mature_MirBase.fadb
# Fields: query acc.ver, subject acc.ver, % identity, alignment length, mismatches, gap opens, q. start, q. end, s. start, s. end, evalue, bit score
# 1 hits found
mdm_miRNA16	mdm-miR5225c	100.000	22	0	0	1	22	1	22	1.43e-06	41.0
# BLASTN 2.10.1+
# Query: mdm_miRNA13
# Database: /home/leclercqj/Apple/mature_MirBase.fadb
# 0 hits found
# BLASTN 2.10.1+
# Query: mdm_miRNA17
# Database: /home/leclercqj/Apple/mature_MirBase.fadb
# 0 hits found
# BLASTN 2.10.1+
# Query: mdm_miRNA18
# Database: /home/leclercqj/Apple/mature_MirBase.fadb
# Fields: query acc.ver, subject acc.ver, % identity, alignment length, mismatches, gap opens, q. start, q. end, s. start, s. end, evalue, bit score
# 2 hits found
mdm_miRNA18	pab-miR858b	100.000	21	0	0	1	21	1	21	4.38e-06	39.2
mdm_miRNA18	ath-miR858b	100.000	21	0	0	1	21	1	21	4.38e-06	39.2
# BLASTN 2.10.1+
# Query: mdm_miRNA19
# Database: /home/leclercqj/Apple/mature_MirBase.fadb
# 0 hits found
# BLASTN 2.10.1+
# Query: mdm_miRNA20
# Database: /home/leclercqj/Apple/mature_MirBase.fadb
# Fields: query acc.ver, subject acc.ver, % identity, alignment length, mismatches, gap opens, q. start, q. end, s. start, s. end, evalue, bit score
# 1 hits found
mdm_miRNA20	mdm-miR319c-3p	100.000	21	0	0	1	21	1	21	4.38e-06	39.2
# BLASTN 2.10.1+
# Query: mdm_miRNA21
# Database: /home/leclercqj/Apple/mature_MirBase.fadb
# Fields: query acc.ver, subject acc.ver, % identity, alignment length, mismatches, gap opens, q. start, q. end, s. start, s. end, evalue, bit score
# 1 hits found
mdm_miRNA21	mdm-miR482a-3p	100.000	22	0	0	1	22	1	22	1.43e-06	41.0
# BLASTN 2.10.1+
# Query: mdm_miRNA22
# Database: /home/leclercqj/Apple/mature_MirBase.fadb
# 0 hits found
# BLASTN 2.10.1+
# Query: mdm_miRNA23
# Database: /home/leclercqj/Apple/mature_MirBase.fadb
# Fields: query acc.ver, subject acc.ver, % identity, alignment length, mismatches, gap opens, q. start, q. end, s. start, s. end, evalue, bit score
# 1 hits found
mdm_miRNA23	mdm-miR858	100.000	21	0	0	1	21	1	21	4.38e-06	39.2
# BLASTN 2.10.1+
# Query: mdm_miRNA24
# Database: /home/leclercqj/Apple/mature_MirBase.fadb
# Fields: query acc.ver, subject acc.ver, % identity, alignment length, mismatches, gap opens, q. start, q. end, s. start, s. end, evalue, bit score
# 50 hits found
mdm_miRNA24	aof-miR167a	100.000	21	0	0	1	21	1	21	4.38e-06	39.2
mdm_miRNA24	csi-miR167e-5p	100.000	21	0	0	1	21	1	21	4.38e-06	39.2
mdm_miRNA24	csi-miR167d-5p	100.000	21	0	0	1	21	1	21	4.38e-06	39.2
mdm_miRNA24	ata-miR167e-5p	100.000	21	0	0	1	21	1	21	4.38e-06	39.2
mdm_miRNA24	ata-miR167a-5p	100.000	21	0	0	1	21	1	21	4.38e-06	39.2
mdm_miRNA24	ata-miR167c-5p	100.000	21	0	0	1	21	1	21	4.38e-06	39.2
mdm_miRNA24	bdi-miR167f	100.000	21	0	0	1	21	1	21	4.38e-06	39.2
mdm_miRNA24	cpa-miR167b	100.000	21	0	0	1	21	1	21	4.38e-06	39.2
mdm_miRNA24	cpa-miR167a	100.000	21	0	0	1	21	1	21	4.38e-06	39.2
mdm_miRNA24	ppe-miR167b	100.000	21	0	0	1	21	1	21	4.38e-06	39.2
mdm_miRNA24	ppe-miR167a	100.000	21	0	0	1	21	1	21	4.38e-06	39.2
mdm_miRNA24	stu-miR167d-5p	100.000	21	0	0	1	21	1	21	4.38e-06	39.2
mdm_miRNA24	stu-miR167a-5p	100.000	21	0	0	1	21	1	21	4.38e-06	39.2
mdm_miRNA24	stu-miR167b-5p	100.000	21	0	0	1	21	1	21	4.38e-06	39.2
mdm_miRNA24	stu-miR167c-5p	100.000	21	0	0	1	21	1	21	4.38e-06	39.2
mdm_miRNA24	mes-miR167c	100.000	21	0	0	1	21	1	21	4.38e-06	39.2
mdm_miRNA24	cme-miR167b	100.000	21	0	0	1	21	1	21	4.38e-06	39.2
mdm_miRNA24	cme-miR167a	100.000	21	0	0	1	21	1	21	4.38e-06	39.2
mdm_miRNA24	mdm-miR167g	100.000	21	0	0	1	21	1	21	4.38e-06	39.2
mdm_miRNA24	mdm-miR167f	100.000	21	0	0	1	21	1	21	4.38e-06	39.2
mdm_miRNA24	mdm-miR167e	100.000	21	0	0	1	21	1	21	4.38e-06	39.2
mdm_miRNA24	mdm-miR167d	100.000	21	0	0	1	21	1	21	4.38e-06	39.2
mdm_miRNA24	mdm-miR167c	100.000	21	0	0	1	21	1	21	4.38e-06	39.2
mdm_miRNA24	mdm-miR167b	100.000	21	0	0	1	21	1	21	4.38e-06	39.2
mdm_miRNA24	ghr-miR167b	100.000	21	0	0	1	21	1	21	4.38e-06	39.2
mdm_miRNA24	nta-miR167e	100.000	21	0	0	1	21	1	21	4.38e-06	39.2
mdm_miRNA24	nta-miR167d	100.000	21	0	0	1	21	1	21	4.38e-06	39.2
mdm_miRNA24	lus-miR167h	100.000	21	0	0	1	21	1	21	4.38e-06	39.2
mdm_miRNA24	lus-miR167e	100.000	21	0	0	1	21	1	21	4.38e-06	39.2
mdm_miRNA24	lus-miR167d	100.000	21	0	0	1	21	1	21	4.38e-06	39.2
mdm_miRNA24	lus-miR167c	100.000	21	0	0	1	21	1	21	4.38e-06	39.2
mdm_miRNA24	dpr-miR167b	100.000	21	0	0	1	21	1	21	4.38e-06	39.2
mdm_miRNA24	dpr-miR167a	100.000	21	0	0	1	21	1	21	4.38e-06	39.2
mdm_miRNA24	bdi-miR167b	100.000	21	0	0	1	21	1	21	4.38e-06	39.2
mdm_miRNA24	tcc-miR167b	100.000	21	0	0	1	21	1	21	4.38e-06	39.2
mdm_miRNA24	tcc-miR167a	100.000	21	0	0	1	21	1	21	4.38e-06	39.2
mdm_miRNA24	aly-miR167b-5p	100.000	21	0	0	1	21	1	21	4.38e-06	39.2
mdm_miRNA24	aly-miR167a-5p	100.000	21	0	0	1	21	1	21	4.38e-06	39.2
mdm_miRNA24	ghr-miR167a	100.000	21	0	0	1	21	1	21	4.38e-06	39.2
mdm_miRNA24	rco-miR167b	100.000	21	0	0	1	21	1	21	4.38e-06	39.2
mdm_miRNA24	rco-miR167a	100.000	21	0	0	1	21	1	21	4.38e-06	39.2
mdm_miRNA24	bdi-miR167a	100.000	21	0	0	1	21	1	21	4.38e-06	39.2
mdm_miRNA24	sbi-miR167i	100.000	21	0	0	1	21	1	21	4.38e-06	39.2
mdm_miRNA24	bra-miR167d	100.000	21	0	0	1	21	1	21	4.38e-06	39.2
mdm_miRNA24	bra-miR167c	100.000	21	0	0	1	21	1	21	4.38e-06	39.2
mdm_miRNA24	bra-miR167b	100.000	21	0	0	1	21	1	21	4.38e-06	39.2
mdm_miRNA24	bra-miR167a	100.000	21	0	0	1	21	1	21	4.38e-06	39.2
mdm_miRNA24	gma-miR167d	100.000	21	0	0	1	21	1	21	4.38e-06	39.2
mdm_miRNA24	sly-miR167a	100.000	21	0	0	1	21	1	21	4.38e-06	39.2
mdm_miRNA24	vvi-miR167e	100.000	21	0	0	1	21	1	21	4.38e-06	39.2
# BLASTN 2.10.1+
# Query: mdm_miRNA25
# Database: /home/leclercqj/Apple/mature_MirBase.fadb
# 0 hits found
# BLASTN 2.10.1+
# Query: mdm_miRNA26
# Database: /home/leclercqj/Apple/mature_MirBase.fadb
# Fields: query acc.ver, subject acc.ver, % identity, alignment length, mismatches, gap opens, q. start, q. end, s. start, s. end, evalue, bit score
# 2 hits found
mdm_miRNA26	csi-miR156j-5p	100.000	21	0	0	1	21	1	21	4.38e-06	39.2
mdm_miRNA26	mtr-miR4414a-5p	100.000	21	0	0	1	21	1	21	4.38e-06	39.2
# BLASTN 2.10.1+
# Query: mdm_miRNA27
# Database: /home/leclercqj/Apple/mature_MirBase.fadb
# Fields: query acc.ver, subject acc.ver, % identity, alignment length, mismatches, gap opens, q. start, q. end, s. start, s. end, evalue, bit score
# 3 hits found
mdm_miRNA27	mdm-miR7121c	100.000	21	0	0	1	21	1	21	4.38e-06	39.2
mdm_miRNA27	mdm-miR7121b	100.000	21	0	0	1	21	1	21	4.38e-06	39.2
mdm_miRNA27	mdm-miR7121a	100.000	21	0	0	1	21	1	21	4.38e-06	39.2
# BLASTN 2.10.1+
# Query: mdm_miRNA28
# Database: /home/leclercqj/Apple/mature_MirBase.fadb
# 0 hits found
# BLASTN 2.10.1+
# Query: mdm_miRNA29
# Database: /home/leclercqj/Apple/mature_MirBase.fadb
# Fields: query acc.ver, subject acc.ver, % identity, alignment length, mismatches, gap opens, q. start, q. end, s. start, s. end, evalue, bit score
# 5 hits found
mdm_miRNA29	mdm-miR7121h	100.000	21	0	0	1	21	1	21	4.38e-06	39.2
mdm_miRNA29	mdm-miR7121g	100.000	21	0	0	1	21	1	21	4.38e-06	39.2
mdm_miRNA29	mdm-miR7121f	100.000	21	0	0	1	21	1	21	4.38e-06	39.2
mdm_miRNA29	mdm-miR7121e	100.000	21	0	0	1	21	1	21	4.38e-06	39.2
mdm_miRNA29	mdm-miR7121d	100.000	21	0	0	1	21	1	21	4.38e-06	39.2
# BLASTN 2.10.1+
# Query: mdm_miRNA30
# Database: /home/leclercqj/Apple/mature_MirBase.fadb
# Fields: query acc.ver, subject acc.ver, % identity, alignment length, mismatches, gap opens, q. start, q. end, s. start, s. end, evalue, bit score
# 1 hits found
mdm_miRNA30	lja-miR166-3p	100.000	21	0	0	1	21	2	22	4.38e-06	39.2
# BLASTN 2.10.1+
# Query: mdm_miRNA31
# Database: /home/leclercqj/Apple/mature_MirBase.fadb
# 0 hits found
# BLASTN 2.10.1+
# Query: mdm_miRNA32
# Database: /home/leclercqj/Apple/mature_MirBase.fadb
# 0 hits found
# BLASTN 2.10.1+
# Query: mdm_miRNA33
# Database: /home/leclercqj/Apple/mature_MirBase.fadb
# Fields: query acc.ver, subject acc.ver, % identity, alignment length, mismatches, gap opens, q. start, q. end, s. start, s. end, evalue, bit score
# 1 hits found
mdm_miRNA33	mdm-miR396a	100.000	21	0	0	1	21	1	21	4.38e-06	39.2
# BLASTN 2.10.1+
# Query: mdm_miRNA34
# Database: /home/leclercqj/Apple/mature_MirBase.fadb
# Fields: query acc.ver, subject acc.ver, % identity, alignment length, mismatches, gap opens, q. start, q. end, s. start, s. end, evalue, bit score
# 50 hits found
mdm_miRNA34	aof-miR393b	100.000	22	0	0	1	22	1	22	1.43e-06	41.0
mdm_miRNA34	fve-miR393b	100.000	22	0	0	1	22	1	22	1.43e-06	41.0
mdm_miRNA34	mes-miR393d	100.000	22	0	0	1	22	1	22	1.43e-06	41.0
mdm_miRNA34	mes-miR393c	100.000	22	0	0	1	22	1	22	1.43e-06	41.0
mdm_miRNA34	mdm-miR393c	100.000	22	0	0	1	22	1	22	1.43e-06	41.0
mdm_miRNA34	mdm-miR393b	100.000	22	0	0	1	22	1	22	1.43e-06	41.0
mdm_miRNA34	mdm-miR393a	100.000	22	0	0	1	22	1	22	1.43e-06	41.0
mdm_miRNA34	ghr-miR393	100.000	22	0	0	1	22	1	22	1.43e-06	41.0
mdm_miRNA34	zma-miR393c-5p	100.000	22	0	0	1	22	1	22	1.43e-06	41.0
mdm_miRNA34	zma-miR393a-5p	100.000	22	0	0	1	22	1	22	1.43e-06	41.0
mdm_miRNA34	osa-miR393b-5p	100.000	22	0	0	1	22	1	22	1.43e-06	41.0
mdm_miRNA34	csi-miR393c-5p	100.000	21	0	0	1	21	1	21	5.01e-06	39.2
mdm_miRNA34	csi-miR393b-5p	100.000	21	0	0	1	21	2	22	5.01e-06	39.2
mdm_miRNA34	cas-miR393-5p	100.000	21	0	0	1	21	1	21	5.01e-06	39.2
mdm_miRNA34	fve-miR393a	100.000	21	0	0	1	21	1	21	5.01e-06	39.2
mdm_miRNA34	vca-miR393-5p	100.000	21	0	0	1	21	1	21	5.01e-06	39.2
mdm_miRNA34	atr-miR393	100.000	21	0	0	1	21	1	21	5.01e-06	39.2
mdm_miRNA34	cpa-miR393	100.000	21	0	0	1	21	1	21	5.01e-06	39.2
mdm_miRNA34	ppe-miR393b	100.000	21	0	0	1	21	1	21	5.01e-06	39.2
mdm_miRNA34	stu-miR393-5p	100.000	21	0	0	1	21	1	21	5.01e-06	39.2
mdm_miRNA34	mes-miR393b	100.000	21	0	0	1	21	1	21	5.01e-06	39.2
mdm_miRNA34	mes-miR393a	100.000	21	0	0	1	21	1	21	5.01e-06	39.2
mdm_miRNA34	cme-miR393c	100.000	21	0	0	1	21	1	21	5.01e-06	39.2
mdm_miRNA34	cme-miR393b	100.000	21	0	0	1	21	1	21	5.01e-06	39.2
mdm_miRNA34	cme-miR393a	100.000	21	0	0	1	21	1	21	5.01e-06	39.2
mdm_miRNA34	htu-miR393c	100.000	21	0	0	1	21	1	21	5.01e-06	39.2
mdm_miRNA34	htu-miR393b	100.000	21	0	0	1	21	1	21	5.01e-06	39.2
mdm_miRNA34	htu-miR393a	100.000	21	0	0	1	21	1	21	5.01e-06	39.2
mdm_miRNA34	gma-miR393k	100.000	21	0	0	1	21	2	22	5.01e-06	39.2
mdm_miRNA34	gma-miR393j	100.000	21	0	0	1	21	2	22	5.01e-06	39.2
mdm_miRNA34	gma-miR393i	100.000	21	0	0	1	21	2	22	5.01e-06	39.2
mdm_miRNA34	gma-miR393h	100.000	21	0	0	1	21	2	22	5.01e-06	39.2
mdm_miRNA34	gma-miR393g	100.000	21	0	0	1	21	1	21	5.01e-06	39.2
mdm_miRNA34	gma-miR393f	100.000	21	0	0	1	21	1	21	5.01e-06	39.2
mdm_miRNA34	gma-miR393e	100.000	21	0	0	1	21	1	21	5.01e-06	39.2
mdm_miRNA34	gma-miR393d	100.000	21	0	0	1	21	1	21	5.01e-06	39.2
mdm_miRNA34	gma-miR393c-5p	100.000	21	0	0	1	21	1	21	5.01e-06	39.2
mdm_miRNA34	lus-miR393d	100.000	21	0	0	1	21	1	21	5.01e-06	39.2
mdm_miRNA34	lus-miR393c	100.000	21	0	0	1	21	1	21	5.01e-06	39.2
mdm_miRNA34	lus-miR393b	100.000	21	0	0	1	21	1	21	5.01e-06	39.2
mdm_miRNA34	lus-miR393a	100.000	21	0	0	1	21	1	21	5.01e-06	39.2
mdm_miRNA34	bdi-miR393b-5p	100.000	21	0	0	1	21	1	21	5.01e-06	39.2
mdm_miRNA34	bdi-miR393a	100.000	21	0	0	1	21	1	21	5.01e-06	39.2
mdm_miRNA34	tcc-miR393b	100.000	21	0	0	1	21	1	21	5.01e-06	39.2
mdm_miRNA34	tcc-miR393a	100.000	21	0	0	1	21	1	21	5.01e-06	39.2
mdm_miRNA34	csi-miR393a	100.000	21	0	0	1	21	2	22	5.01e-06	39.2
mdm_miRNA34	aly-miR393b-5p	100.000	21	0	0	1	21	1	21	5.01e-06	39.2
mdm_miRNA34	aly-miR393a-5p	100.000	21	0	0	1	21	1	21	5.01e-06	39.2
mdm_miRNA34	rco-miR393	100.000	21	0	0	1	21	1	21	5.01e-06	39.2
mdm_miRNA34	zma-miR393b-5p	100.000	21	0	0	1	21	1	21	5.01e-06	39.2
# BLASTN 2.10.1+
# Query: mdm_miRNA35
# Database: /home/leclercqj/Apple/mature_MirBase.fadb
# 0 hits found
# BLASTN 2.10.1+
# Query: mdm_miRNA36
# Database: /home/leclercqj/Apple/mature_MirBase.fadb
# 0 hits found
# BLASTN 2.10.1+
# Query: mdm_miRNA37
# Database: /home/leclercqj/Apple/mature_MirBase.fadb
# Fields: query acc.ver, subject acc.ver, % identity, alignment length, mismatches, gap opens, q. start, q. end, s. start, s. end, evalue, bit score
# 50 hits found
mdm_miRNA37	aof-miR164	100.000	21	0	0	1	21	1	21	4.38e-06	39.2
mdm_miRNA37	csi-miR164d-5p	100.000	21	0	0	1	21	1	21	4.38e-06	39.2
mdm_miRNA37	csi-miR164c-5p	100.000	21	0	0	1	21	1	21	4.38e-06	39.2
mdm_miRNA37	csi-miR164b-5p	100.000	21	0	0	1	21	1	21	4.38e-06	39.2
mdm_miRNA37	cas-miR164	100.000	21	0	0	1	21	1	21	4.38e-06	39.2
mdm_miRNA37	fve-miR164b	100.000	21	0	0	1	21	1	21	4.38e-06	39.2
mdm_miRNA37	fve-miR164a-5p	100.000	21	0	0	1	21	1	21	4.38e-06	39.2
mdm_miRNA37	ata-miR164c-5p	100.000	21	0	0	1	21	1	21	4.38e-06	39.2
mdm_miRNA37	ata-miR164b-5p	100.000	21	0	0	1	21	1	21	4.38e-06	39.2
mdm_miRNA37	bra-miR164e-5p	100.000	21	0	0	1	21	1	21	4.38e-06	39.2
mdm_miRNA37	sly-miR164b-5p	100.000	21	0	0	1	21	1	21	4.38e-06	39.2
mdm_miRNA37	sly-miR164a-5p	100.000	21	0	0	1	21	1	21	4.38e-06	39.2
mdm_miRNA37	atr-miR164b	100.000	21	0	0	1	21	1	21	4.38e-06	39.2
mdm_miRNA37	atr-miR164a	100.000	21	0	0	1	21	1	21	4.38e-06	39.2
mdm_miRNA37	cpa-miR164c	100.000	21	0	0	1	21	1	21	4.38e-06	39.2
mdm_miRNA37	cpa-miR164b	100.000	21	0	0	1	21	1	21	4.38e-06	39.2
mdm_miRNA37	cpa-miR164a	100.000	21	0	0	1	21	1	21	4.38e-06	39.2
mdm_miRNA37	ppe-miR164c	100.000	21	0	0	1	21	1	21	4.38e-06	39.2
mdm_miRNA37	ppe-miR164b	100.000	21	0	0	1	21	1	21	4.38e-06	39.2
mdm_miRNA37	ppe-miR164a	100.000	21	0	0	1	21	1	21	4.38e-06	39.2
mdm_miRNA37	mes-miR164c	100.000	21	0	0	1	21	1	21	4.38e-06	39.2
mdm_miRNA37	mes-miR164b	100.000	21	0	0	1	21	1	21	4.38e-06	39.2
mdm_miRNA37	mes-miR164a	100.000	21	0	0	1	21	1	21	4.38e-06	39.2
mdm_miRNA37	cme-miR164d	100.000	21	0	0	1	21	1	21	4.38e-06	39.2
mdm_miRNA37	cme-miR164c	100.000	21	0	0	1	21	1	21	4.38e-06	39.2
mdm_miRNA37	mdm-miR164f	100.000	21	0	0	1	21	1	21	4.38e-06	39.2
mdm_miRNA37	mdm-miR164e	100.000	21	0	0	1	21	1	21	4.38e-06	39.2
mdm_miRNA37	mdm-miR164d	100.000	21	0	0	1	21	1	21	4.38e-06	39.2
mdm_miRNA37	mdm-miR164c	100.000	21	0	0	1	21	1	21	4.38e-06	39.2
mdm_miRNA37	mdm-miR164b	100.000	21	0	0	1	21	1	21	4.38e-06	39.2
mdm_miRNA37	gma-miR164k	100.000	21	0	0	1	21	1	21	4.38e-06	39.2
mdm_miRNA37	gma-miR164j	100.000	21	0	0	1	21	1	21	4.38e-06	39.2
mdm_miRNA37	gma-miR164i	100.000	21	0	0	1	21	1	21	4.38e-06	39.2
mdm_miRNA37	gma-miR164h	100.000	21	0	0	1	21	1	21	4.38e-06	39.2
mdm_miRNA37	gma-miR164g	100.000	21	0	0	1	21	1	21	4.38e-06	39.2
mdm_miRNA37	gma-miR164f	100.000	21	0	0	1	21	1	21	4.38e-06	39.2
mdm_miRNA37	gma-miR164e	100.000	21	0	0	1	21	1	21	4.38e-06	39.2
mdm_miRNA37	nta-miR164b	100.000	21	0	0	1	21	1	21	4.38e-06	39.2
mdm_miRNA37	nta-miR164a	100.000	21	0	0	1	21	1	21	4.38e-06	39.2
mdm_miRNA37	lus-miR164e	100.000	21	0	0	1	21	1	21	4.38e-06	39.2
mdm_miRNA37	lus-miR164d	100.000	21	0	0	1	21	1	21	4.38e-06	39.2
mdm_miRNA37	lus-miR164c	100.000	21	0	0	1	21	1	21	4.38e-06	39.2
mdm_miRNA37	lus-miR164b	100.000	21	0	0	1	21	1	21	4.38e-06	39.2
mdm_miRNA37	lus-miR164a	100.000	21	0	0	1	21	1	21	4.38e-06	39.2
mdm_miRNA37	ssl-miR164b	100.000	21	0	0	1	21	1	21	4.38e-06	39.2
mdm_miRNA37	ssl-miR164a	100.000	21	0	0	1	21	1	21	4.38e-06	39.2
mdm_miRNA37	bdi-miR164e	100.000	21	0	0	1	21	1	21	4.38e-06	39.2
mdm_miRNA37	bdi-miR164a-5p	100.000	21	0	0	1	21	1	21	4.38e-06	39.2
mdm_miRNA37	bdi-miR164b	100.000	21	0	0	1	21	1	21	4.38e-06	39.2
mdm_miRNA37	tcc-miR164b	100.000	21	0	0	1	21	1	21	4.38e-06	39.2
# BLASTN 2.10.1+
# Query: mdm_miRNA38
# Database: /home/leclercqj/Apple/mature_MirBase.fadb
# Fields: query acc.ver, subject acc.ver, % identity, alignment length, mismatches, gap opens, q. start, q. end, s. start, s. end, evalue, bit score
# 3 hits found
mdm_miRNA38	mdm-miR2118c	100.000	22	0	0	1	22	1	22	1.43e-06	41.0
mdm_miRNA38	mdm-miR2118b	100.000	22	0	0	1	22	1	22	1.43e-06	41.0
mdm_miRNA38	mdm-miR2118a	100.000	22	0	0	1	22	1	22	1.43e-06	41.0
# BLASTN 2.10.1+
# Query: mdm_miRNA39
# Database: /home/leclercqj/Apple/mature_MirBase.fadb
# Fields: query acc.ver, subject acc.ver, % identity, alignment length, mismatches, gap opens, q. start, q. end, s. start, s. end, evalue, bit score
# 2 hits found
mdm_miRNA39	mes-miR319h	100.000	21	0	0	1	21	1	21	4.38e-06	39.2
mdm_miRNA39	vun-miR319b	100.000	21	0	0	1	21	1	21	4.38e-06	39.2
# BLASTN 2.10.1+
# Query: mdm_miRNA40
# Database: /home/leclercqj/Apple/mature_MirBase.fadb
# 0 hits found
# BLASTN 2.10.1+
# Query: mdm_miRNA41
# Database: /home/leclercqj/Apple/mature_MirBase.fadb
# Fields: query acc.ver, subject acc.ver, % identity, alignment length, mismatches, gap opens, q. start, q. end, s. start, s. end, evalue, bit score
# 5 hits found
mdm_miRNA41	cas-miR159b-3p	100.000	21	0	0	1	21	1	21	4.38e-06	39.2
mdm_miRNA41	cas-miR159c-3p	100.000	21	0	0	1	21	1	21	4.38e-06	39.2
mdm_miRNA41	lus-miR159c	100.000	21	0	0	1	21	1	21	4.38e-06	39.2
mdm_miRNA41	aly-miR159b-3p	100.000	21	0	0	1	21	1	21	4.38e-06	39.2
mdm_miRNA41	ath-miR159b-3p	100.000	21	0	0	1	21	1	21	4.38e-06	39.2
# BLASTN 2.10.1+
# Query: mdm_miRNA42
# Database: /home/leclercqj/Apple/mature_MirBase.fadb
# Fields: query acc.ver, subject acc.ver, % identity, alignment length, mismatches, gap opens, q. start, q. end, s. start, s. end, evalue, bit score
# 17 hits found
mdm_miRNA42	sly-miR166c-3p	100.000	21	0	0	1	21	1	21	4.38e-06	39.2
mdm_miRNA42	stu-miR166b	100.000	21	0	0	1	21	1	21	4.38e-06	39.2
mdm_miRNA42	cme-miR166e	100.000	21	0	0	1	21	1	21	4.38e-06	39.2
mdm_miRNA42	lus-miR166e	100.000	21	0	0	1	21	1	21	4.38e-06	39.2
mdm_miRNA42	dpr-miR166a	100.000	21	0	0	1	21	1	21	4.38e-06	39.2
mdm_miRNA42	ssl-miR166a	100.000	21	0	0	1	21	1	21	4.38e-06	39.2
mdm_miRNA42	tcc-miR166c	100.000	21	0	0	1	21	1	21	4.38e-06	39.2
mdm_miRNA42	pab-miR166a	100.000	21	0	0	1	21	1	21	4.38e-06	39.2
mdm_miRNA42	aqc-miR166d	100.000	21	0	0	1	21	1	21	4.38e-06	39.2
mdm_miRNA42	aqc-miR166a	100.000	21	0	0	1	21	1	21	4.38e-06	39.2
mdm_miRNA42	mtr-miR166f	100.000	21	0	0	1	21	1	21	4.38e-06	39.2
mdm_miRNA42	mtr-miR166c	100.000	21	0	0	1	21	1	21	4.38e-06	39.2
mdm_miRNA42	zma-miR166m-3p	100.000	21	0	0	1	21	1	21	4.38e-06	39.2
mdm_miRNA42	zma-miR166l-3p	100.000	21	0	0	1	21	1	21	4.38e-06	39.2
mdm_miRNA42	sbi-miR166f	100.000	21	0	0	1	21	1	21	4.38e-06	39.2
mdm_miRNA42	osa-miR166h-3p	100.000	21	0	0	1	21	1	21	4.38e-06	39.2
mdm_miRNA42	osa-miR166g-3p	100.000	21	0	0	1	21	1	21	4.38e-06	39.2
# BLASTN 2.10.1+
# Query: mdm_miRNA43
# Database: /home/leclercqj/Apple/mature_MirBase.fadb
# 0 hits found
# BLASTN 2.10.1+
# Query: mdm_miRNA44
# Database: /home/leclercqj/Apple/mature_MirBase.fadb
# 0 hits found
# BLASTN 2.10.1+
# Query: mdm_miRNA45
# Database: /home/leclercqj/Apple/mature_MirBase.fadb
# Fields: query acc.ver, subject acc.ver, % identity, alignment length, mismatches, gap opens, q. start, q. end, s. start, s. end, evalue, bit score
# 37 hits found
mdm_miRNA45	fve-miR162-3p	100.000	21	0	0	1	21	1	21	4.38e-06	39.2
mdm_miRNA45	eun-miR162-3p	100.000	21	0	0	1	21	1	21	4.38e-06	39.2
mdm_miRNA45	bra-miR162-3p	100.000	21	0	0	1	21	1	21	4.38e-06	39.2
mdm_miRNA45	ppe-miR162	100.000	21	0	0	1	21	1	21	4.38e-06	39.2
mdm_miRNA45	stu-miR162b-3p	100.000	21	0	0	1	21	1	21	4.38e-06	39.2
mdm_miRNA45	stu-miR162a-3p	100.000	21	0	0	1	21	1	21	4.38e-06	39.2
mdm_miRNA45	mes-miR162	100.000	21	0	0	1	21	1	21	4.38e-06	39.2
mdm_miRNA45	cme-miR162	100.000	21	0	0	1	21	1	21	4.38e-06	39.2
mdm_miRNA45	mdm-miR162b	100.000	21	0	0	1	21	1	21	4.38e-06	39.2
mdm_miRNA45	mdm-miR162a	100.000	21	0	0	1	21	1	21	4.38e-06	39.2
mdm_miRNA45	hpe-miR162a	100.000	21	0	0	1	21	1	21	4.38e-06	39.2
mdm_miRNA45	htu-miR162a	100.000	21	0	0	1	21	1	21	4.38e-06	39.2
mdm_miRNA45	pde-miR162	100.000	21	0	0	1	21	1	21	4.38e-06	39.2
mdm_miRNA45	nta-miR162b	100.000	21	0	0	1	21	1	21	4.38e-06	39.2
mdm_miRNA45	nta-miR162a	100.000	21	0	0	1	21	1	21	4.38e-06	39.2
mdm_miRNA45	lus-miR162b	100.000	21	0	0	1	21	1	21	4.38e-06	39.2
mdm_miRNA45	lus-miR162a	100.000	21	0	0	1	21	1	21	4.38e-06	39.2
mdm_miRNA45	vun-miR162	100.000	21	0	0	1	21	1	21	4.38e-06	39.2
mdm_miRNA45	aau-miR162	100.000	21	0	0	1	21	1	21	4.38e-06	39.2
mdm_miRNA45	gma-miR162c	100.000	21	0	0	1	21	1	21	4.38e-06	39.2
mdm_miRNA45	gma-miR162b	100.000	21	0	0	1	21	1	21	4.38e-06	39.2
mdm_miRNA45	tcc-miR162	100.000	21	0	0	1	21	1	21	4.38e-06	39.2
mdm_miRNA45	aly-miR162b-3p	100.000	21	0	0	1	21	1	21	4.38e-06	39.2
mdm_miRNA45	aly-miR162a-3p	100.000	21	0	0	1	21	1	21	4.38e-06	39.2
mdm_miRNA45	rco-miR162	100.000	21	0	0	1	21	1	21	4.38e-06	39.2
mdm_miRNA45	csi-miR162-3p	100.000	21	0	0	1	21	1	21	4.38e-06	39.2
mdm_miRNA45	sbi-miR162	100.000	21	0	0	1	21	1	21	4.38e-06	39.2
mdm_miRNA45	sly-miR162	100.000	21	0	0	1	21	1	21	4.38e-06	39.2
mdm_miRNA45	vvi-miR162	100.000	21	0	0	1	21	1	21	4.38e-06	39.2
mdm_miRNA45	cpa-miR162a	100.000	21	0	0	1	21	1	21	4.38e-06	39.2
mdm_miRNA45	ghr-miR162a	100.000	21	0	0	1	21	1	21	4.38e-06	39.2
mdm_miRNA45	ptc-miR162b	100.000	21	0	0	1	21	1	21	4.38e-06	39.2
mdm_miRNA45	ptc-miR162a	100.000	21	0	0	1	21	1	21	4.38e-06	39.2
mdm_miRNA45	mtr-miR162	100.000	21	0	0	1	21	1	21	4.38e-06	39.2
mdm_miRNA45	osa-miR162a	100.000	21	0	0	1	21	1	21	4.38e-06	39.2
mdm_miRNA45	ath-miR162b-3p	100.000	21	0	0	1	21	1	21	4.38e-06	39.2
mdm_miRNA45	ath-miR162a-3p	100.000	21	0	0	1	21	1	21	4.38e-06	39.2
# BLASTN 2.10.1+
# Query: mdm_miRNA46
# Database: /home/leclercqj/Apple/mature_MirBase.fadb
# Fields: query acc.ver, subject acc.ver, % identity, alignment length, mismatches, gap opens, q. start, q. end, s. start, s. end, evalue, bit score
# 4 hits found
mdm_miRNA46	csi-miR166f-3p	100.000	21	0	0	1	21	1	21	4.38e-06	39.2
mdm_miRNA46	cas-miR166e	100.000	21	0	0	1	21	1	21	4.38e-06	39.2
mdm_miRNA46	crt-miR166b	100.000	21	0	0	1	21	1	21	4.38e-06	39.2
mdm_miRNA46	osa-miR166m	100.000	21	0	0	1	21	1	21	4.38e-06	39.2
# BLASTN 2.10.1+
# Query: mdm_miRNA47
# Database: /home/leclercqj/Apple/mature_MirBase.fadb
# 0 hits found
# BLASTN 2.10.1+
# Query: mdm_miRNA48
# Database: /home/leclercqj/Apple/mature_MirBase.fadb
# Fields: query acc.ver, subject acc.ver, % identity, alignment length, mismatches, gap opens, q. start, q. end, s. start, s. end, evalue, bit score
# 4 hits found
mdm_miRNA48	cpa-miR166d	100.000	21	0	0	1	21	1	21	4.38e-06	39.2
mdm_miRNA48	mes-miR166h	100.000	21	0	0	1	21	1	21	4.38e-06	39.2
mdm_miRNA48	gma-miR166j-3p	100.000	21	0	0	1	21	1	21	4.38e-06	39.2
mdm_miRNA48	crt-miR166a	100.000	21	0	0	1	21	1	21	4.38e-06	39.2
# BLASTN 2.10.1+
# Query: mdm_miRNA49
# Database: /home/leclercqj/Apple/mature_MirBase.fadb
# Fields: query acc.ver, subject acc.ver, % identity, alignment length, mismatches, gap opens, q. start, q. end, s. start, s. end, evalue, bit score
# 34 hits found
mdm_miRNA49	csi-miR403b-3p	100.000	21	0	0	1	21	1	21	4.38e-06	39.2
mdm_miRNA49	cas-miR403	100.000	21	0	0	1	21	1	21	4.38e-06	39.2
mdm_miRNA49	bra-miR403-3p	100.000	21	0	0	1	21	1	21	4.38e-06	39.2
mdm_miRNA49	ppe-miR403	100.000	21	0	0	1	21	1	21	4.38e-06	39.2
mdm_miRNA49	aly-miR403b-3p	100.000	21	0	0	1	21	1	21	4.38e-06	39.2
mdm_miRNA49	ptc-miR403d	100.000	21	0	0	1	21	1	21	4.38e-06	39.2
mdm_miRNA49	mes-miR403b	100.000	21	0	0	1	21	1	21	4.38e-06	39.2
mdm_miRNA49	mes-miR403a	100.000	21	0	0	1	21	1	21	4.38e-06	39.2
mdm_miRNA49	mdm-miR403b	100.000	21	0	0	1	21	1	21	4.38e-06	39.2
mdm_miRNA49	mdm-miR403a	100.000	21	0	0	1	21	1	21	4.38e-06	39.2
mdm_miRNA49	hpe-miR403a	100.000	21	0	0	1	21	1	21	4.38e-06	39.2
mdm_miRNA49	har-miR403a	100.000	21	0	0	1	21	1	21	4.38e-06	39.2
mdm_miRNA49	htu-miR403e	100.000	21	0	0	1	21	1	21	4.38e-06	39.2
mdm_miRNA49	htu-miR403d	100.000	21	0	0	1	21	1	21	4.38e-06	39.2
mdm_miRNA49	htu-miR403c	100.000	21	0	0	1	21	1	21	4.38e-06	39.2
mdm_miRNA49	htu-miR403b	100.000	21	0	0	1	21	1	21	4.38e-06	39.2
mdm_miRNA49	htu-miR403a	100.000	21	0	0	1	21	1	21	4.38e-06	39.2
mdm_miRNA49	bna-miR403	100.000	21	0	0	1	21	1	21	4.38e-06	39.2
mdm_miRNA49	tcc-miR403b	100.000	21	0	0	1	21	1	21	4.38e-06	39.2
mdm_miRNA49	tcc-miR403a	100.000	21	0	0	1	21	1	21	4.38e-06	39.2
mdm_miRNA49	csi-miR403a-3p	100.000	21	0	0	1	21	1	21	4.38e-06	39.2
mdm_miRNA49	aly-miR403a-3p	100.000	21	0	0	1	21	1	21	4.38e-06	39.2
mdm_miRNA49	rco-miR403b	100.000	21	0	0	1	21	1	21	4.38e-06	39.2
mdm_miRNA49	rco-miR403a	100.000	21	0	0	1	21	1	21	4.38e-06	39.2
mdm_miRNA49	vvi-miR403f	100.000	21	0	0	1	21	1	21	4.38e-06	39.2
mdm_miRNA49	vvi-miR403e	100.000	21	0	0	1	21	1	21	4.38e-06	39.2
mdm_miRNA49	vvi-miR403d	100.000	21	0	0	1	21	1	21	4.38e-06	39.2
mdm_miRNA49	vvi-miR403c	100.000	21	0	0	1	21	1	21	4.38e-06	39.2
mdm_miRNA49	vvi-miR403b	100.000	21	0	0	1	21	1	21	4.38e-06	39.2
mdm_miRNA49	vvi-miR403a	100.000	21	0	0	1	21	1	21	4.38e-06	39.2
mdm_miRNA49	ptc-miR403c-3p	100.000	21	0	0	1	21	1	21	4.38e-06	39.2
mdm_miRNA49	ptc-miR403b	100.000	21	0	0	1	21	1	21	4.38e-06	39.2
mdm_miRNA49	ptc-miR403a	100.000	21	0	0	1	21	1	21	4.38e-06	39.2
mdm_miRNA49	ath-miR403-3p	100.000	21	0	0	1	21	1	21	4.38e-06	39.2
# BLASTN 2.10.1+
# Query: mdm_miRNA50
# Database: /home/leclercqj/Apple/mature_MirBase.fadb
# Fields: query acc.ver, subject acc.ver, % identity, alignment length, mismatches, gap opens, q. start, q. end, s. start, s. end, evalue, bit score
# 1 hits found
mdm_miRNA50	mes-miR166i	100.000	21	0	0	1	21	1	21	4.38e-06	39.2
# BLASTN 2.10.1+
# Query: mdm_miRNA51
# Database: /home/leclercqj/Apple/mature_MirBase.fadb
# 0 hits found
# BLASTN 2.10.1+
# Query: mdm_miRNA52
# Database: /home/leclercqj/Apple/mature_MirBase.fadb
# Fields: query acc.ver, subject acc.ver, % identity, alignment length, mismatches, gap opens, q. start, q. end, s. start, s. end, evalue, bit score
# 6 hits found
mdm_miRNA52	aof-miR166c	100.000	21	0	0	1	21	1	21	4.38e-06	39.2
mdm_miRNA52	cas-miR165a	100.000	21	0	0	1	21	1	21	4.38e-06	39.2
mdm_miRNA52	lus-miR166b	100.000	21	0	0	1	21	1	21	4.38e-06	39.2
mdm_miRNA52	bna-miR166f	100.000	21	0	0	1	21	1	21	4.38e-06	39.2
mdm_miRNA52	ath-miR165b	100.000	21	0	0	1	21	1	21	4.38e-06	39.2
mdm_miRNA52	ath-miR165a-3p	100.000	21	0	0	1	21	1	21	4.38e-06	39.2
# BLASTN 2.10.1+
# Query: mdm_miRNA53
# Database: /home/leclercqj/Apple/mature_MirBase.fadb
# 0 hits found
# BLASTN 2.10.1+
# Query: mdm_miRNA54
# Database: /home/leclercqj/Apple/mature_MirBase.fadb
# Fields: query acc.ver, subject acc.ver, % identity, alignment length, mismatches, gap opens, q. start, q. end, s. start, s. end, evalue, bit score
# 50 hits found
mdm_miRNA54	cas-miR166f-3p	100.000	22	0	0	1	22	1	22	1.43e-06	41.0
mdm_miRNA54	cas-miR166d	100.000	22	0	0	1	22	1	22	1.43e-06	41.0
mdm_miRNA54	cas-miR166c-3p	100.000	22	0	0	1	22	1	22	1.43e-06	41.0
mdm_miRNA54	aof-miR166d	100.000	21	0	0	1	21	1	21	5.01e-06	39.2
mdm_miRNA54	pab-miR166i	100.000	21	0	0	1	21	1	21	5.01e-06	39.2
mdm_miRNA54	pab-miR166h	100.000	21	0	0	1	21	1	21	5.01e-06	39.2
mdm_miRNA54	pab-miR166g	100.000	21	0	0	1	21	1	21	5.01e-06	39.2
mdm_miRNA54	pab-miR166f	100.000	21	0	0	1	21	1	21	5.01e-06	39.2
mdm_miRNA54	fve-miR166f	100.000	21	0	0	1	21	1	21	5.01e-06	39.2
mdm_miRNA54	fve-miR166c	100.000	21	0	0	1	21	1	21	5.01e-06	39.2
mdm_miRNA54	fve-miR166d-3p	100.000	21	0	0	1	21	1	21	5.01e-06	39.2
mdm_miRNA54	fve-miR166b	100.000	21	0	0	1	21	1	21	5.01e-06	39.2
mdm_miRNA54	fve-miR166a	100.000	21	0	0	1	21	1	21	5.01e-06	39.2
mdm_miRNA54	fve-miR166e	100.000	21	0	0	1	21	1	21	5.01e-06	39.2
mdm_miRNA54	lja-miR166-3p	100.000	21	0	0	1	21	4	24	5.01e-06	39.2
mdm_miRNA54	mdm-miR166j	100.000	21	0	0	1	21	1	21	5.01e-06	39.2
mdm_miRNA54	eun-miR166-3p	100.000	21	0	0	1	21	1	21	5.01e-06	39.2
mdm_miRNA54	vca-miR166c-3p	100.000	21	0	0	1	21	1	21	5.01e-06	39.2
mdm_miRNA54	vca-miR166b-3p	100.000	21	0	0	1	21	1	21	5.01e-06	39.2
mdm_miRNA54	vca-miR166a-3p	100.000	21	0	0	1	21	1	21	5.01e-06	39.2
mdm_miRNA54	ata-miR166d-3p	100.000	21	0	0	1	21	1	21	5.01e-06	39.2
mdm_miRNA54	ata-miR166b-3p	100.000	21	0	0	1	21	1	21	5.01e-06	39.2
mdm_miRNA54	ata-miR166e-3p	100.000	21	0	0	1	21	1	21	5.01e-06	39.2
mdm_miRNA54	ata-miR166a-3p	100.000	21	0	0	1	21	1	21	5.01e-06	39.2
mdm_miRNA54	atr-miR166d	100.000	21	0	0	1	21	1	21	5.01e-06	39.2
mdm_miRNA54	atr-miR166c	100.000	21	0	0	1	21	1	21	5.01e-06	39.2
mdm_miRNA54	atr-miR166a	100.000	21	0	0	1	21	1	21	5.01e-06	39.2
mdm_miRNA54	lus-miR166k	100.000	21	0	0	1	21	1	21	5.01e-06	39.2
mdm_miRNA54	lus-miR166j	100.000	21	0	0	1	21	1	21	5.01e-06	39.2
mdm_miRNA54	cpa-miR166c	100.000	21	0	0	1	21	1	21	5.01e-06	39.2
mdm_miRNA54	cpa-miR166b	100.000	21	0	0	1	21	1	21	5.01e-06	39.2
mdm_miRNA54	cpa-miR166a	100.000	21	0	0	1	21	1	21	5.01e-06	39.2
mdm_miRNA54	ppe-miR166e	100.000	21	0	0	1	21	1	21	5.01e-06	39.2
mdm_miRNA54	ppe-miR166d	100.000	21	0	0	1	21	1	21	5.01e-06	39.2
mdm_miRNA54	ppe-miR166c	100.000	21	0	0	1	21	1	21	5.01e-06	39.2
mdm_miRNA54	ppe-miR166b	100.000	21	0	0	1	21	1	21	5.01e-06	39.2
mdm_miRNA54	ppe-miR166a	100.000	21	0	0	1	21	1	21	5.01e-06	39.2
mdm_miRNA54	aly-miR166h-3p	100.000	21	0	0	1	21	1	21	5.01e-06	39.2
mdm_miRNA54	stu-miR166d-3p	100.000	21	0	0	1	21	1	21	5.01e-06	39.2
mdm_miRNA54	stu-miR166c-3p	100.000	21	0	0	1	21	1	21	5.01e-06	39.2
mdm_miRNA54	stu-miR166a-3p	100.000	21	0	0	1	21	1	21	5.01e-06	39.2
mdm_miRNA54	ssp-miR166	100.000	21	0	0	1	21	1	21	5.01e-06	39.2
mdm_miRNA54	bdi-miR166i-3p	100.000	21	0	0	1	21	1	21	5.01e-06	39.2
mdm_miRNA54	mes-miR166g	100.000	21	0	0	1	21	1	21	5.01e-06	39.2
mdm_miRNA54	mes-miR166f	100.000	21	0	0	1	21	1	21	5.01e-06	39.2
mdm_miRNA54	mes-miR166e	100.000	21	0	0	1	21	1	21	5.01e-06	39.2
mdm_miRNA54	mes-miR166d	100.000	21	0	0	1	21	1	21	5.01e-06	39.2
mdm_miRNA54	mes-miR166c	100.000	21	0	0	1	21	1	21	5.01e-06	39.2
mdm_miRNA54	mes-miR166b	100.000	21	0	0	1	21	1	21	5.01e-06	39.2
mdm_miRNA54	mes-miR166a	100.000	21	0	0	1	21	1	21	5.01e-06	39.2
# BLASTN 2.10.1+
# Query: mdm_miRNA55
# Database: /home/leclercqj/Apple/mature_MirBase.fadb
# 0 hits found
# BLASTN 2.10.1+
# Query: mdm_miRNA56
# Database: /home/leclercqj/Apple/mature_MirBase.fadb
# Fields: query acc.ver, subject acc.ver, % identity, alignment length, mismatches, gap opens, q. start, q. end, s. start, s. end, evalue, bit score
# 6 hits found
mdm_miRNA56	aof-miR396a	100.000	21	0	0	1	21	1	21	4.38e-06	39.2
mdm_miRNA56	eun-miR396a-5p	100.000	21	0	0	1	21	1	21	4.38e-06	39.2
mdm_miRNA56	cme-miR396e	100.000	21	0	0	1	21	1	21	4.38e-06	39.2
mdm_miRNA56	mdm-miR396g	100.000	21	0	0	1	21	1	21	4.38e-06	39.2
mdm_miRNA56	mdm-miR396f	100.000	21	0	0	1	21	1	21	4.38e-06	39.2
mdm_miRNA56	ptc-miR396f	100.000	21	0	0	1	21	1	21	4.38e-06	39.2
# BLASTN 2.10.1+
# Query: mdm_miRNA57
# Database: /home/leclercqj/Apple/mature_MirBase.fadb
# 0 hits found
# BLASTN 2.10.1+
# Query: mdm_miRNA58
# Database: /home/leclercqj/Apple/mature_MirBase.fadb
# Fields: query acc.ver, subject acc.ver, % identity, alignment length, mismatches, gap opens, q. start, q. end, s. start, s. end, evalue, bit score
# 1 hits found
mdm_miRNA58	osa-miR166e-3p	100.000	21	0	0	1	21	1	21	4.38e-06	39.2
# BLASTN 2.10.1+
# Query: mdm_miRNA59
# Database: /home/leclercqj/Apple/mature_MirBase.fadb
# 0 hits found
# BLASTN 2.10.1+
# Query: mdm_miRNA60
# Database: /home/leclercqj/Apple/mature_MirBase.fadb
# 0 hits found
# BLASTN 2.10.1+
# Query: mdm_miRNA61
# Database: /home/leclercqj/Apple/mature_MirBase.fadb
# Fields: query acc.ver, subject acc.ver, % identity, alignment length, mismatches, gap opens, q. start, q. end, s. start, s. end, evalue, bit score
# 50 hits found
mdm_miRNA61	aof-miR390	100.000	21	0	0	1	21	1	21	4.38e-06	39.2
mdm_miRNA61	mes-miR390b	100.000	21	0	0	1	21	1	21	4.38e-06	39.2
mdm_miRNA61	cas-miR390b	100.000	21	0	0	1	21	1	21	4.38e-06	39.2
mdm_miRNA61	cas-miR390a-5p	100.000	21	0	0	1	21	1	21	4.38e-06	39.2
mdm_miRNA61	pab-miR390b	100.000	21	0	0	1	21	1	21	4.38e-06	39.2
mdm_miRNA61	pab-miR390a	100.000	21	0	0	1	21	1	21	4.38e-06	39.2
mdm_miRNA61	fve-miR390b	100.000	21	0	0	1	21	1	21	4.38e-06	39.2
mdm_miRNA61	fve-miR390a	100.000	21	0	0	1	21	1	21	4.38e-06	39.2
mdm_miRNA61	ata-miR390-5p	100.000	21	0	0	1	21	1	21	4.38e-06	39.2
mdm_miRNA61	bra-miR390-5p	100.000	21	0	0	1	21	1	21	4.38e-06	39.2
mdm_miRNA61	sly-miR390b-5p	100.000	21	0	0	1	21	1	21	4.38e-06	39.2
mdm_miRNA61	atr-miR390.2	100.000	21	0	0	1	21	1	21	4.38e-06	39.2
mdm_miRNA61	cpa-miR390b	100.000	21	0	0	1	21	1	21	4.38e-06	39.2
mdm_miRNA61	cpa-miR390a	100.000	21	0	0	1	21	1	21	4.38e-06	39.2
mdm_miRNA61	ppe-miR390	100.000	21	0	0	1	21	1	21	4.38e-06	39.2
mdm_miRNA61	lja-miR390b-5p	100.000	21	0	0	1	21	1	21	4.38e-06	39.2
mdm_miRNA61	lja-miR390a-5p	100.000	21	0	0	1	21	1	21	4.38e-06	39.2
mdm_miRNA61	cme-miR390c	100.000	21	0	0	1	21	1	21	4.38e-06	39.2
mdm_miRNA61	cme-miR390a	100.000	21	0	0	1	21	1	21	4.38e-06	39.2
mdm_miRNA61	cme-miR390d	100.000	21	0	0	1	21	1	21	4.38e-06	39.2
mdm_miRNA61	mdm-miR390f	100.000	21	0	0	1	21	1	21	4.38e-06	39.2
mdm_miRNA61	mdm-miR390e	100.000	21	0	0	1	21	1	21	4.38e-06	39.2
mdm_miRNA61	mdm-miR390d	100.000	21	0	0	1	21	1	21	4.38e-06	39.2
mdm_miRNA61	mdm-miR390c	100.000	21	0	0	1	21	1	21	4.38e-06	39.2
mdm_miRNA61	mdm-miR390b	100.000	21	0	0	1	21	1	21	4.38e-06	39.2
mdm_miRNA61	mdm-miR390a	100.000	21	0	0	1	21	1	21	4.38e-06	39.2
mdm_miRNA61	hex-miR390b	100.000	21	0	0	1	21	1	21	4.38e-06	39.2
mdm_miRNA61	hex-miR390a	100.000	21	0	0	1	21	1	21	4.38e-06	39.2
mdm_miRNA61	gma-miR390g	100.000	21	0	0	1	21	1	21	4.38e-06	39.2
mdm_miRNA61	gma-miR390f	100.000	21	0	0	1	21	1	21	4.38e-06	39.2
mdm_miRNA61	nta-miR390c	100.000	21	0	0	1	21	1	21	4.38e-06	39.2
mdm_miRNA61	nta-miR390b	100.000	21	0	0	1	21	1	21	4.38e-06	39.2
mdm_miRNA61	lus-miR390d	100.000	21	0	0	1	21	1	21	4.38e-06	39.2
mdm_miRNA61	lus-miR390c	100.000	21	0	0	1	21	1	21	4.38e-06	39.2
mdm_miRNA61	lus-miR390b	100.000	21	0	0	1	21	1	21	4.38e-06	39.2
mdm_miRNA61	lus-miR390a	100.000	21	0	0	1	21	1	21	4.38e-06	39.2
mdm_miRNA61	cme-miR390b	100.000	21	0	0	1	21	1	21	4.38e-06	39.2
mdm_miRNA61	bdi-miR390a-5p	100.000	21	0	0	1	21	1	21	4.38e-06	39.2
mdm_miRNA61	tcc-miR390b	100.000	21	0	0	1	21	1	21	4.38e-06	39.2
mdm_miRNA61	tcc-miR390a	100.000	21	0	0	1	21	1	21	4.38e-06	39.2
mdm_miRNA61	aly-miR390b-5p	100.000	21	0	0	1	21	1	21	4.38e-06	39.2
mdm_miRNA61	aly-miR390a-5p	100.000	21	0	0	1	21	1	21	4.38e-06	39.2
mdm_miRNA61	rco-miR390b	100.000	21	0	0	1	21	1	21	4.38e-06	39.2
mdm_miRNA61	rco-miR390a	100.000	21	0	0	1	21	1	21	4.38e-06	39.2
mdm_miRNA61	csi-miR390a-5p	100.000	21	0	0	1	21	1	21	4.38e-06	39.2
mdm_miRNA61	zma-miR390b-5p	100.000	21	0	0	1	21	1	21	4.38e-06	39.2
mdm_miRNA61	zma-miR390a-5p	100.000	21	0	0	1	21	1	21	4.38e-06	39.2
mdm_miRNA61	sbi-miR390	100.000	21	0	0	1	21	1	21	4.38e-06	39.2
mdm_miRNA61	gma-miR390a-5p	100.000	21	0	0	1	21	1	21	4.38e-06	39.2
mdm_miRNA61	vvi-miR390	100.000	21	0	0	1	21	1	21	4.38e-06	39.2
# BLASTN 2.10.1+
# Query: mdm_miRNA62
# Database: /home/leclercqj/Apple/mature_MirBase.fadb
# 0 hits found
# BLASTN 2.10.1+
# Query: mdm_miRNA63
# Database: /home/leclercqj/Apple/mature_MirBase.fadb
# Fields: query acc.ver, subject acc.ver, % identity, alignment length, mismatches, gap opens, q. start, q. end, s. start, s. end, evalue, bit score
# 50 hits found
mdm_miRNA63	aof-miR167b	100.000	22	0	0	1	22	1	22	1.43e-06	41.0
mdm_miRNA63	eun-miR167a-5p	100.000	22	0	0	1	22	1	22	1.43e-06	41.0
mdm_miRNA63	vca-miR167b-5p	100.000	22	0	0	1	22	1	22	1.43e-06	41.0
mdm_miRNA63	vca-miR167a-5p	100.000	22	0	0	1	22	1	22	1.43e-06	41.0
mdm_miRNA63	ata-miR167d-5p	100.000	22	0	0	1	22	1	22	1.43e-06	41.0
mdm_miRNA63	ata-miR167b-5p	100.000	22	0	0	1	22	1	22	1.43e-06	41.0
mdm_miRNA63	bdi-miR167g	100.000	22	0	0	1	22	1	22	1.43e-06	41.0
mdm_miRNA63	cpa-miR167d	100.000	22	0	0	1	22	1	22	1.43e-06	41.0
mdm_miRNA63	ppe-miR167c	100.000	22	0	0	1	22	1	22	1.43e-06	41.0
mdm_miRNA63	bdi-miR167e-5p	100.000	22	0	0	1	22	1	22	1.43e-06	41.0
mdm_miRNA63	mes-miR167f	100.000	22	0	0	1	22	1	22	1.43e-06	41.0
mdm_miRNA63	mes-miR167e	100.000	22	0	0	1	22	1	22	1.43e-06	41.0
mdm_miRNA63	mes-miR167d	100.000	22	0	0	1	22	1	22	1.43e-06	41.0
mdm_miRNA63	bdi-miR167d-5p	100.000	22	0	0	1	22	1	22	1.43e-06	41.0
mdm_miRNA63	bdi-miR167c-5p	100.000	22	0	0	1	22	1	22	1.43e-06	41.0
mdm_miRNA63	gma-miR167g	100.000	22	0	0	1	22	1	22	1.43e-06	41.0
mdm_miRNA63	ccl-miR167b	100.000	22	0	0	1	22	1	22	1.43e-06	41.0
mdm_miRNA63	ctr-miR167	100.000	22	0	0	1	22	1	22	1.43e-06	41.0
mdm_miRNA63	ccl-miR167a	100.000	22	0	0	1	22	1	22	1.43e-06	41.0
mdm_miRNA63	aof-miR167c	100.000	21	0	0	1	21	1	21	5.01e-06	39.2
mdm_miRNA63	pab-miR167b	100.000	21	0	0	1	21	1	21	5.01e-06	39.2
mdm_miRNA63	eun-miR167b-5p	100.000	21	0	0	1	21	1	21	5.01e-06	39.2
mdm_miRNA63	ata-miR167f-5p	100.000	21	0	0	1	21	1	21	5.01e-06	39.2
mdm_miRNA63	tae-miR167c-5p	100.000	21	0	0	1	21	1	21	5.01e-06	39.2
mdm_miRNA63	atr-miR167	100.000	21	0	0	1	21	1	21	5.01e-06	39.2
mdm_miRNA63	cme-miR167f	100.000	21	0	0	1	21	1	21	5.01e-06	39.2
mdm_miRNA63	cme-miR167d	100.000	21	0	0	1	21	1	21	5.01e-06	39.2
mdm_miRNA63	nta-miR167c	100.000	21	0	0	1	21	1	21	5.01e-06	39.2
mdm_miRNA63	nta-miR167b	100.000	21	0	0	1	21	1	21	5.01e-06	39.2
mdm_miRNA63	nta-miR167a	100.000	21	0	0	1	21	1	21	5.01e-06	39.2
mdm_miRNA63	lus-miR167i	100.000	21	0	0	1	21	1	21	5.01e-06	39.2
mdm_miRNA63	lus-miR167g	100.000	21	0	0	1	21	1	21	5.01e-06	39.2
mdm_miRNA63	lus-miR167f	100.000	21	0	0	1	21	1	21	5.01e-06	39.2
mdm_miRNA63	cca-miR167	100.000	21	0	0	1	21	1	21	5.01e-06	39.2
mdm_miRNA63	mes-miR167a	100.000	21	0	0	1	21	1	21	5.01e-06	39.2
mdm_miRNA63	dpr-miR167c	100.000	21	0	0	1	21	1	21	5.01e-06	39.2
mdm_miRNA63	mtr-miR167b-5p	100.000	21	0	0	1	21	1	21	5.01e-06	39.2
mdm_miRNA63	gma-miR167j	100.000	21	0	0	1	21	1	21	5.01e-06	39.2
mdm_miRNA63	ssp-miR167b	100.000	21	0	0	1	21	1	21	5.01e-06	39.2
mdm_miRNA63	csi-miR167a-5p	100.000	21	0	0	1	21	1	21	5.01e-06	39.2
mdm_miRNA63	csi-miR167c-5p	100.000	21	0	0	1	21	1	21	5.01e-06	39.2
mdm_miRNA63	gso-miR167a	100.000	21	0	0	1	21	1	21	5.01e-06	39.2
mdm_miRNA63	aly-miR167d-5p	100.000	21	0	0	1	21	1	21	5.01e-06	39.2
mdm_miRNA63	rco-miR167c	100.000	21	0	0	1	21	1	21	5.01e-06	39.2
mdm_miRNA63	zma-miR167j-5p	100.000	21	0	0	1	21	1	21	5.01e-06	39.2
mdm_miRNA63	sbi-miR167h	100.000	21	0	0	1	21	1	21	5.01e-06	39.2
mdm_miRNA63	lja-miR167	100.000	21	0	0	1	21	1	21	5.01e-06	39.2
mdm_miRNA63	gma-miR167c	100.000	21	0	0	1	21	1	21	5.01e-06	39.2
mdm_miRNA63	vvi-miR167a	100.000	21	0	0	1	21	1	21	5.01e-06	39.2
mdm_miRNA63	ptc-miR167e	100.000	21	0	0	1	21	1	21	5.01e-06	39.2
# BLASTN 2.10.1+
# Query: mdm_miRNA64
# Database: /home/leclercqj/Apple/mature_MirBase.fadb
# Fields: query acc.ver, subject acc.ver, % identity, alignment length, mismatches, gap opens, q. start, q. end, s. start, s. end, evalue, bit score
# 2 hits found
mdm_miRNA64	ppe-miR535b	100.000	21	0	0	1	21	1	21	4.38e-06	39.2
mdm_miRNA64	mdm-miR535d	100.000	21	0	0	1	21	1	21	4.38e-06	39.2
# BLASTN 2.10.1+
# Query: mdm_miRNA65
# Database: /home/leclercqj/Apple/mature_MirBase.fadb
# 0 hits found
# BLASTN 2.10.1+
# Query: mdm_miRNA66
# Database: /home/leclercqj/Apple/mature_MirBase.fadb
# 0 hits found
# BLASTN 2.10.1+
# Query: mdm_miRNA67
# Database: /home/leclercqj/Apple/mature_MirBase.fadb
# 0 hits found
# BLASTN 2.10.1+
# Query: mdm_miRNA68
# Database: /home/leclercqj/Apple/mature_MirBase.fadb
# 0 hits found
# BLASTN 2.10.1+
# Query: mdm_miRNA69
# Database: /home/leclercqj/Apple/mature_MirBase.fadb
# 0 hits found
# BLASTN 2.10.1+
# Query: mdm_miRNA70
# Database: /home/leclercqj/Apple/mature_MirBase.fadb
# 0 hits found
# BLASTN 2.10.1+
# Query: mdm_miRNA71
# Database: /home/leclercqj/Apple/mature_MirBase.fadb
# Fields: query acc.ver, subject acc.ver, % identity, alignment length, mismatches, gap opens, q. start, q. end, s. start, s. end, evalue, bit score
# 9 hits found
mdm_miRNA71	fve-miR396c-3p	100.000	21	0	0	1	21	1	21	4.38e-06	39.2
mdm_miRNA71	fve-miR396a-3p	100.000	21	0	0	1	21	1	21	4.38e-06	39.2
mdm_miRNA71	eun-miR396a-3p	100.000	21	0	0	1	21	1	21	4.38e-06	39.2
mdm_miRNA71	sly-miR396a-3p	100.000	21	0	0	1	21	1	21	4.38e-06	39.2
mdm_miRNA71	gma-miR396i-3p	100.000	21	0	0	1	21	1	21	4.38e-06	39.2
mdm_miRNA71	csi-miR396b-3p	100.000	21	0	0	1	21	1	21	4.38e-06	39.2
mdm_miRNA71	aly-miR396a-3p	100.000	21	0	0	1	21	1	21	4.38e-06	39.2
mdm_miRNA71	mtr-miR396b-3p	100.000	21	0	0	1	21	1	21	4.38e-06	39.2
mdm_miRNA71	ath-miR396a-3p	100.000	21	0	0	1	21	1	21	4.38e-06	39.2
# BLASTN 2.10.1+
# Query: mdm_miRNA72
# Database: /home/leclercqj/Apple/mature_MirBase.fadb
# 0 hits found
# BLASTN 2.10.1+
# Query: mdm_miRNA73
# Database: /home/leclercqj/Apple/mature_MirBase.fadb
# 0 hits found
# BLASTN 2.10.1+
# Query: mdm_miRNA74
# Database: /home/leclercqj/Apple/mature_MirBase.fadb
# 0 hits found
# BLASTN 2.10.1+
# Query: mdm_miRNA75
# Database: /home/leclercqj/Apple/mature_MirBase.fadb
# Fields: query acc.ver, subject acc.ver, % identity, alignment length, mismatches, gap opens, q. start, q. end, s. start, s. end, evalue, bit score
# 50 hits found
mdm_miRNA75	lus-miR166k	100.000	22	0	0	1	22	1	22	1.43e-06	41.0
mdm_miRNA75	hbr-miR166b	100.000	22	0	0	1	22	1	22	1.43e-06	41.0
mdm_miRNA75	lus-miR166i	100.000	22	0	0	1	22	1	22	1.43e-06	41.0
mdm_miRNA75	csi-miR166a-3p	100.000	22	0	0	1	22	1	22	1.43e-06	41.0
mdm_miRNA75	ctr-miR166	100.000	22	0	0	1	22	1	22	1.43e-06	41.0
mdm_miRNA75	aof-miR166d	100.000	21	0	0	1	21	1	21	5.01e-06	39.2
mdm_miRNA75	cas-miR166f-3p	100.000	21	0	0	1	21	1	21	5.01e-06	39.2
mdm_miRNA75	cas-miR166d	100.000	21	0	0	1	21	1	21	5.01e-06	39.2
mdm_miRNA75	cas-miR166c-3p	100.000	21	0	0	1	21	1	21	5.01e-06	39.2
mdm_miRNA75	pab-miR166i	100.000	21	0	0	1	21	1	21	5.01e-06	39.2
mdm_miRNA75	pab-miR166h	100.000	21	0	0	1	21	1	21	5.01e-06	39.2
mdm_miRNA75	pab-miR166g	100.000	21	0	0	1	21	1	21	5.01e-06	39.2
mdm_miRNA75	pab-miR166f	100.000	21	0	0	1	21	1	21	5.01e-06	39.2
mdm_miRNA75	fve-miR166f	100.000	21	0	0	1	21	1	21	5.01e-06	39.2
mdm_miRNA75	fve-miR166c	100.000	21	0	0	1	21	1	21	5.01e-06	39.2
mdm_miRNA75	fve-miR166d-3p	100.000	21	0	0	1	21	1	21	5.01e-06	39.2
mdm_miRNA75	fve-miR166b	100.000	21	0	0	1	21	1	21	5.01e-06	39.2
mdm_miRNA75	fve-miR166a	100.000	21	0	0	1	21	1	21	5.01e-06	39.2
mdm_miRNA75	fve-miR166e	100.000	21	0	0	1	21	1	21	5.01e-06	39.2
mdm_miRNA75	lja-miR166-3p	100.000	21	0	0	1	21	4	24	5.01e-06	39.2
mdm_miRNA75	mdm-miR166j	100.000	21	0	0	1	21	1	21	5.01e-06	39.2
mdm_miRNA75	eun-miR166-3p	100.000	21	0	0	1	21	1	21	5.01e-06	39.2
mdm_miRNA75	vca-miR166c-3p	100.000	21	0	0	1	21	1	21	5.01e-06	39.2
mdm_miRNA75	vca-miR166b-3p	100.000	21	0	0	1	21	1	21	5.01e-06	39.2
mdm_miRNA75	vca-miR166a-3p	100.000	21	0	0	1	21	1	21	5.01e-06	39.2
mdm_miRNA75	ata-miR166d-3p	100.000	21	0	0	1	21	1	21	5.01e-06	39.2
mdm_miRNA75	ata-miR166b-3p	100.000	21	0	0	1	21	1	21	5.01e-06	39.2
mdm_miRNA75	ata-miR166e-3p	100.000	21	0	0	1	21	1	21	5.01e-06	39.2
mdm_miRNA75	ata-miR166a-3p	100.000	21	0	0	1	21	1	21	5.01e-06	39.2
mdm_miRNA75	atr-miR166d	100.000	21	0	0	1	21	1	21	5.01e-06	39.2
mdm_miRNA75	atr-miR166c	100.000	21	0	0	1	21	1	21	5.01e-06	39.2
mdm_miRNA75	atr-miR166a	100.000	21	0	0	1	21	1	21	5.01e-06	39.2
mdm_miRNA75	lus-miR166j	100.000	21	0	0	1	21	1	21	5.01e-06	39.2
mdm_miRNA75	cpa-miR166c	100.000	21	0	0	1	21	1	21	5.01e-06	39.2
mdm_miRNA75	cpa-miR166b	100.000	21	0	0	1	21	1	21	5.01e-06	39.2
mdm_miRNA75	cpa-miR166a	100.000	21	0	0	1	21	1	21	5.01e-06	39.2
mdm_miRNA75	ppe-miR166e	100.000	21	0	0	1	21	1	21	5.01e-06	39.2
mdm_miRNA75	ppe-miR166d	100.000	21	0	0	1	21	1	21	5.01e-06	39.2
mdm_miRNA75	ppe-miR166c	100.000	21	0	0	1	21	1	21	5.01e-06	39.2
mdm_miRNA75	ppe-miR166b	100.000	21	0	0	1	21	1	21	5.01e-06	39.2
mdm_miRNA75	ppe-miR166a	100.000	21	0	0	1	21	1	21	5.01e-06	39.2
mdm_miRNA75	aly-miR166h-3p	100.000	21	0	0	1	21	1	21	5.01e-06	39.2
mdm_miRNA75	stu-miR166d-3p	100.000	21	0	0	1	21	1	21	5.01e-06	39.2
mdm_miRNA75	stu-miR166c-3p	100.000	21	0	0	1	21	1	21	5.01e-06	39.2
mdm_miRNA75	stu-miR166a-3p	100.000	21	0	0	1	21	1	21	5.01e-06	39.2
mdm_miRNA75	ssp-miR166	100.000	21	0	0	1	21	1	21	5.01e-06	39.2
mdm_miRNA75	bdi-miR166i-3p	100.000	21	0	0	1	21	1	21	5.01e-06	39.2
mdm_miRNA75	mes-miR166g	100.000	21	0	0	1	21	1	21	5.01e-06	39.2
mdm_miRNA75	mes-miR166f	100.000	21	0	0	1	21	1	21	5.01e-06	39.2
mdm_miRNA75	mes-miR166e	100.000	21	0	0	1	21	1	21	5.01e-06	39.2
# BLASTN 2.10.1+
# Query: mdm_miRNA76
# Database: /home/leclercqj/Apple/mature_MirBase.fadb
# Fields: query acc.ver, subject acc.ver, % identity, alignment length, mismatches, gap opens, q. start, q. end, s. start, s. end, evalue, bit score
# 1 hits found
mdm_miRNA76	mdm-miR7126-5p	100.000	21	0	0	1	21	1	21	4.38e-06	39.2
# BLASTN 2.10.1+
# Query: mdm_miRNA77
# Database: /home/leclercqj/Apple/mature_MirBase.fadb
# Fields: query acc.ver, subject acc.ver, % identity, alignment length, mismatches, gap opens, q. start, q. end, s. start, s. end, evalue, bit score
# 5 hits found
mdm_miRNA77	ptc-miR159d	100.000	21	0	0	1	21	1	21	4.38e-06	39.2
mdm_miRNA77	sbi-miR159b	100.000	21	0	0	1	21	1	21	4.38e-06	39.2
mdm_miRNA77	zma-miR159d-3p	100.000	21	0	0	1	21	1	21	4.38e-06	39.2
mdm_miRNA77	zma-miR159c-3p	100.000	21	0	0	1	21	1	21	4.38e-06	39.2
mdm_miRNA77	sof-miR159c	100.000	21	0	0	1	21	1	21	4.38e-06	39.2
# BLASTN 2.10.1+
# Query: mdm_miRNA78
# Database: /home/leclercqj/Apple/mature_MirBase.fadb
# Fields: query acc.ver, subject acc.ver, % identity, alignment length, mismatches, gap opens, q. start, q. end, s. start, s. end, evalue, bit score
# 1 hits found
mdm_miRNA78	mdm-miR7126-3p	100.000	22	0	0	1	22	1	22	1.43e-06	41.0
# BLASTN 2.10.1+
# Query: mdm_miRNA79
# Database: /home/leclercqj/Apple/mature_MirBase.fadb
# Fields: query acc.ver, subject acc.ver, % identity, alignment length, mismatches, gap opens, q. start, q. end, s. start, s. end, evalue, bit score
# 8 hits found
mdm_miRNA79	fve-miR156e	100.000	21	0	0	1	21	1	21	4.38e-06	39.2
mdm_miRNA79	fve-miR156c	100.000	21	0	0	1	21	1	21	4.38e-06	39.2
mdm_miRNA79	fve-miR156a	100.000	21	0	0	1	21	1	21	4.38e-06	39.2
mdm_miRNA79	fve-miR156b	100.000	21	0	0	1	21	1	21	4.38e-06	39.2
mdm_miRNA79	cme-miR156j	100.000	21	0	0	1	21	2	22	4.38e-06	39.2
mdm_miRNA79	gma-miR156o	100.000	21	0	0	1	21	1	21	4.38e-06	39.2
mdm_miRNA79	gma-miR156n	100.000	21	0	0	1	21	1	21	4.38e-06	39.2
mdm_miRNA79	gma-miR156k	100.000	21	0	0	1	21	1	21	4.38e-06	39.2
# BLASTN 2.10.1+
# Query: mdm_miRNA80
# Database: /home/leclercqj/Apple/mature_MirBase.fadb
# 0 hits found
# BLASTN 2.10.1+
# Query: mdm_miRNA81
# Database: /home/leclercqj/Apple/mature_MirBase.fadb
# 0 hits found
# BLASTN 2.10.1+
# Query: mdm_miRNA82
# Database: /home/leclercqj/Apple/mature_MirBase.fadb
# 0 hits found
# BLASTN 2.10.1+
# Query: mdm_miRNA83
# Database: /home/leclercqj/Apple/mature_MirBase.fadb
# Fields: query acc.ver, subject acc.ver, % identity, alignment length, mismatches, gap opens, q. start, q. end, s. start, s. end, evalue, bit score
# 22 hits found
mdm_miRNA83	cas-miR171a-3p	100.000	21	0	0	1	21	1	21	4.38e-06	39.2
mdm_miRNA83	atr-miR171c	100.000	21	0	0	1	21	1	21	4.38e-06	39.2
mdm_miRNA83	atr-miR171a	100.000	21	0	0	1	21	1	21	4.38e-06	39.2
mdm_miRNA83	cme-miR171g	100.000	21	0	0	1	21	1	21	4.38e-06	39.2
mdm_miRNA83	cme-miR171a	100.000	21	0	0	1	21	1	21	4.38e-06	39.2
mdm_miRNA83	cme-miR171e	100.000	21	0	0	1	21	1	21	4.38e-06	39.2
mdm_miRNA83	mdm-miR171e	100.000	21	0	0	1	21	1	21	4.38e-06	39.2
mdm_miRNA83	mdm-miR171d	100.000	21	0	0	1	21	1	21	4.38e-06	39.2
mdm_miRNA83	mdm-miR171c	100.000	21	0	0	1	21	1	21	4.38e-06	39.2
mdm_miRNA83	tcc-miR171a	100.000	21	0	0	1	21	1	21	4.38e-06	39.2
mdm_miRNA83	aly-miR171a-3p	100.000	21	0	0	1	21	1	21	4.38e-06	39.2
mdm_miRNA83	ccl-miR171	100.000	21	0	0	1	21	1	21	4.38e-06	39.2
mdm_miRNA83	zma-miR171n-3p	100.000	21	0	0	1	21	1	21	4.38e-06	39.2
mdm_miRNA83	bdi-miR171a	100.000	21	0	0	1	21	1	21	4.38e-06	39.2
mdm_miRNA83	sbi-miR171j	100.000	21	0	0	1	21	1	21	4.38e-06	39.2
mdm_miRNA83	sbi-miR171g	100.000	21	0	0	1	21	1	21	4.38e-06	39.2
mdm_miRNA83	bra-miR171e	100.000	21	0	0	1	21	1	21	4.38e-06	39.2
mdm_miRNA83	vvi-miR171e	100.000	21	0	0	1	21	1	21	4.38e-06	39.2
mdm_miRNA83	bna-miR171f	100.000	21	0	0	1	21	1	21	4.38e-06	39.2
mdm_miRNA83	bna-miR171g	100.000	21	0	0	1	21	1	21	4.38e-06	39.2
mdm_miRNA83	osa-miR171a	100.000	21	0	0	1	21	1	21	4.38e-06	39.2
mdm_miRNA83	ath-miR171a-3p	100.000	21	0	0	1	21	1	21	4.38e-06	39.2
# BLASTN 2.10.1+
# Query: mdm_miRNA84
# Database: /home/leclercqj/Apple/mature_MirBase.fadb
# Fields: query acc.ver, subject acc.ver, % identity, alignment length, mismatches, gap opens, q. start, q. end, s. start, s. end, evalue, bit score
# 1 hits found
mdm_miRNA84	mdm-miR159c	100.000	21	0	0	1	21	1	21	4.38e-06	39.2
# BLASTN 2.10.1+
# Query: mdm_miRNA85
# Database: /home/leclercqj/Apple/mature_MirBase.fadb
# 0 hits found
# BLASTN 2.10.1+
# Query: mdm_miRNA86
# Database: /home/leclercqj/Apple/mature_MirBase.fadb
# 0 hits found
# BLASTN 2.10.1+
# Query: mdm_miRNA87
# Database: /home/leclercqj/Apple/mature_MirBase.fadb
# 0 hits found
# BLASTN 2.10.1+
# Query: mdm_miRNA88
# Database: /home/leclercqj/Apple/mature_MirBase.fadb
# 0 hits found
# BLASTN 2.10.1+
# Query: mdm_miRNA89
# Database: /home/leclercqj/Apple/mature_MirBase.fadb
# 0 hits found
# BLASTN 2.10.1+
# Query: mdm_miRNA90
# Database: /home/leclercqj/Apple/mature_MirBase.fadb
# Fields: query acc.ver, subject acc.ver, % identity, alignment length, mismatches, gap opens, q. start, q. end, s. start, s. end, evalue, bit score
# 16 hits found
mdm_miRNA90	cas-miR166a	100.000	21	0	0	1	21	1	21	4.38e-06	39.2
mdm_miRNA90	eun-miR166-5p	100.000	21	0	0	1	21	1	21	4.38e-06	39.2
mdm_miRNA90	vca-miR166b-5p	100.000	21	0	0	1	21	1	21	4.38e-06	39.2
mdm_miRNA90	stu-miR166a-5p	100.000	21	0	0	1	21	1	21	4.38e-06	39.2
mdm_miRNA90	gma-miR166l	100.000	21	0	0	1	21	1	21	4.38e-06	39.2
mdm_miRNA90	bdi-miR166e-5p	100.000	21	0	0	1	21	1	21	4.38e-06	39.2
mdm_miRNA90	gma-miR166c-5p	100.000	21	0	0	1	21	1	21	4.38e-06	39.2
mdm_miRNA90	aly-miR166d-5p	100.000	21	0	0	1	21	1	21	4.38e-06	39.2
mdm_miRNA90	aly-miR166c-5p	100.000	21	0	0	1	21	1	21	4.38e-06	39.2
mdm_miRNA90	aly-miR166a-5p	100.000	21	0	0	1	21	1	21	4.38e-06	39.2
mdm_miRNA90	csi-miR166a-5p	100.000	21	0	0	1	21	1	21	4.38e-06	39.2
mdm_miRNA90	csi-miR166e-5p	100.000	21	0	0	1	21	1	21	4.38e-06	39.2
mdm_miRNA90	mtr-miR166g-5p	100.000	21	0	0	1	21	1	21	4.38e-06	39.2
mdm_miRNA90	gma-miR166a-5p	100.000	21	0	0	1	21	1	21	4.38e-06	39.2
mdm_miRNA90	zma-miR166c-5p	100.000	21	0	0	1	21	1	21	4.38e-06	39.2
mdm_miRNA90	osa-miR166d-5p	100.000	21	0	0	1	21	1	21	4.38e-06	39.2
# BLASTN 2.10.1+
# Query: mdm_miRNA91
# Database: /home/leclercqj/Apple/mature_MirBase.fadb
# Fields: query acc.ver, subject acc.ver, % identity, alignment length, mismatches, gap opens, q. start, q. end, s. start, s. end, evalue, bit score
# 1 hits found
mdm_miRNA91	cas-miR394	100.000	21	0	0	1	21	1	21	4.38e-06	39.2
# BLASTN 2.10.1+
# Query: mdm_miRNA92
# Database: /home/leclercqj/Apple/mature_MirBase.fadb
# 0 hits found
# BLASTN 2.10.1+
# Query: mdm_miRNA93
# Database: /home/leclercqj/Apple/mature_MirBase.fadb
# Fields: query acc.ver, subject acc.ver, % identity, alignment length, mismatches, gap opens, q. start, q. end, s. start, s. end, evalue, bit score
# 34 hits found
mdm_miRNA93	aof-miR168a	100.000	21	0	0	1	21	1	21	4.38e-06	39.2
mdm_miRNA93	csi-miR168-5p	100.000	21	0	0	1	21	1	21	4.38e-06	39.2
mdm_miRNA93	pab-miR168a	100.000	21	0	0	1	21	1	21	4.38e-06	39.2
mdm_miRNA93	fve-miR168-5p	100.000	21	0	0	1	21	1	21	4.38e-06	39.2
mdm_miRNA93	lja-miR168-5p	100.000	21	0	0	1	21	1	21	4.38e-06	39.2
mdm_miRNA93	vca-miR168b-5p	100.000	21	0	0	1	21	1	21	4.38e-06	39.2
mdm_miRNA93	vca-miR168a-5p	100.000	21	0	0	1	21	1	21	4.38e-06	39.2
mdm_miRNA93	bra-miR168a-5p	100.000	21	0	0	1	21	1	21	4.38e-06	39.2
mdm_miRNA93	atr-miR168	100.000	21	0	0	1	21	1	21	4.38e-06	39.2
mdm_miRNA93	ppe-miR168	100.000	21	0	0	1	21	1	21	4.38e-06	39.2
mdm_miRNA93	mdm-miR168b	100.000	21	0	0	1	21	1	21	4.38e-06	39.2
mdm_miRNA93	mdm-miR168a	100.000	21	0	0	1	21	1	21	4.38e-06	39.2
mdm_miRNA93	nta-miR168e	100.000	21	0	0	1	21	1	21	4.38e-06	39.2
mdm_miRNA93	nta-miR168d	100.000	21	0	0	1	21	1	21	4.38e-06	39.2
mdm_miRNA93	lus-miR168b	100.000	21	0	0	1	21	1	21	4.38e-06	39.2
mdm_miRNA93	lus-miR168a	100.000	21	0	0	1	21	1	21	4.38e-06	39.2
mdm_miRNA93	cca-miR168a	100.000	21	0	0	1	21	1	21	4.38e-06	39.2
mdm_miRNA93	mes-miR168a	100.000	21	0	0	1	21	1	21	4.38e-06	39.2
mdm_miRNA93	vun-miR168	100.000	21	0	0	1	21	1	21	4.38e-06	39.2
mdm_miRNA93	mtr-miR168c-5p	100.000	21	0	0	1	21	1	21	4.38e-06	39.2
mdm_miRNA93	mtr-miR168b	100.000	21	0	0	1	21	1	21	4.38e-06	39.2
mdm_miRNA93	tcc-miR168	100.000	21	0	0	1	21	1	21	4.38e-06	39.2
mdm_miRNA93	aly-miR168b-5p	100.000	21	0	0	1	21	1	21	4.38e-06	39.2
mdm_miRNA93	aly-miR168a-5p	100.000	21	0	0	1	21	1	21	4.38e-06	39.2
mdm_miRNA93	rco-miR168	100.000	21	0	0	1	21	1	21	4.38e-06	39.2
mdm_miRNA93	crt-miR168	100.000	21	0	0	1	21	1	21	4.38e-06	39.2
mdm_miRNA93	ccl-miR168	100.000	21	0	0	1	21	1	21	4.38e-06	39.2
mdm_miRNA93	vvi-miR168	100.000	21	0	0	1	21	1	21	4.38e-06	39.2
mdm_miRNA93	bna-miR168a	100.000	21	0	0	1	21	1	21	4.38e-06	39.2
mdm_miRNA93	ptc-miR168b-5p	100.000	21	0	0	1	21	1	21	4.38e-06	39.2
mdm_miRNA93	ptc-miR168a-5p	100.000	21	0	0	1	21	1	21	4.38e-06	39.2
mdm_miRNA93	gma-miR168a	100.000	21	0	0	1	21	1	21	4.38e-06	39.2
mdm_miRNA93	ath-miR168b-5p	100.000	21	0	0	1	21	1	21	4.38e-06	39.2
mdm_miRNA93	ath-miR168a-5p	100.000	21	0	0	1	21	1	21	4.38e-06	39.2
# BLASTN 2.10.1+
# Query: mdm_miRNA94
# Database: /home/leclercqj/Apple/mature_MirBase.fadb
# 0 hits found
# BLASTN 2.10.1+
# Query: mdm_miRNA95
# Database: /home/leclercqj/Apple/mature_MirBase.fadb
# 0 hits found
# BLASTN 2.10.1+
# Query: mdm_miRNA96
# Database: /home/leclercqj/Apple/mature_MirBase.fadb
# 0 hits found
# BLASTN 2.10.1+
# Query: mdm_miRNA97
# Database: /home/leclercqj/Apple/mature_MirBase.fadb
# 0 hits found
# BLASTN 2.10.1+
# Query: mdm_miRNA98
# Database: /home/leclercqj/Apple/mature_MirBase.fadb
# 0 hits found
# BLASTN 2.10.1+
# Query: mdm_miRNA99
# Database: /home/leclercqj/Apple/mature_MirBase.fadb
# 0 hits found
# BLASTN 2.10.1+
# Query: mdm_miRNA100
# Database: /home/leclercqj/Apple/mature_MirBase.fadb
# 0 hits found
# BLASTN 2.10.1+
# Query: mdm_miRNA101
# Database: /home/leclercqj/Apple/mature_MirBase.fadb
# Fields: query acc.ver, subject acc.ver, % identity, alignment length, mismatches, gap opens, q. start, q. end, s. start, s. end, evalue, bit score
# 4 hits found
mdm_miRNA101	aof-miR479	100.000	21	0	0	1	21	1	21	4.38e-06	39.2
mdm_miRNA101	ata-miR171a-3p	100.000	21	0	0	1	21	1	21	4.38e-06	39.2
mdm_miRNA101	stu-miR479	100.000	21	0	0	1	21	1	21	4.38e-06	39.2
mdm_miRNA101	mdm-miR171i	100.000	21	0	0	1	21	1	21	4.38e-06	39.2
# BLASTN 2.10.1+
# Query: mdm_miRNA102
# Database: /home/leclercqj/Apple/mature_MirBase.fadb
# Fields: query acc.ver, subject acc.ver, % identity, alignment length, mismatches, gap opens, q. start, q. end, s. start, s. end, evalue, bit score
# 1 hits found
mdm_miRNA102	mdm-miR319d	100.000	21	0	0	1	21	1	21	4.38e-06	39.2
# BLASTN 2.10.1+
# Query: mdm_miRNA103
# Database: /home/leclercqj/Apple/mature_MirBase.fadb
# Fields: query acc.ver, subject acc.ver, % identity, alignment length, mismatches, gap opens, q. start, q. end, s. start, s. end, evalue, bit score
# 1 hits found
mdm_miRNA103	lus-miR159b	100.000	21	0	0	1	21	1	21	4.38e-06	39.2
# BLASTN 2.10.1+
# Query: mdm_miRNA104
# Database: /home/leclercqj/Apple/mature_MirBase.fadb
# 0 hits found
# BLASTN 2.10.1+
# Query: mdm_miRNA105
# Database: /home/leclercqj/Apple/mature_MirBase.fadb
# 0 hits found
# BLASTN 2.10.1+
# Query: mdm_miRNA106
# Database: /home/leclercqj/Apple/mature_MirBase.fadb
# Fields: query acc.ver, subject acc.ver, % identity, alignment length, mismatches, gap opens, q. start, q. end, s. start, s. end, evalue, bit score
# 14 hits found
mdm_miRNA106	aof-miR171b	100.000	21	0	0	1	21	1	21	4.38e-06	39.2
mdm_miRNA106	pab-miR171c	100.000	21	0	0	1	21	1	21	4.38e-06	39.2
mdm_miRNA106	pab-miR171b	100.000	21	0	0	1	21	1	21	4.38e-06	39.2
mdm_miRNA106	fve-miR171f-3p	100.000	21	0	0	1	21	1	21	4.38e-06	39.2
mdm_miRNA106	lja-miR171d-5p	100.000	21	0	0	1	21	1	21	4.38e-06	39.2
mdm_miRNA106	mes-miR171e	100.000	21	0	0	1	21	1	21	4.38e-06	39.2
mdm_miRNA106	mdm-miR171l	100.000	21	0	0	1	21	1	21	4.38e-06	39.2
mdm_miRNA106	mdm-miR171k	100.000	21	0	0	1	21	1	21	4.38e-06	39.2
mdm_miRNA106	mdm-miR171j	100.000	21	0	0	1	21	1	21	4.38e-06	39.2
mdm_miRNA106	ppe-miR171b	100.000	21	0	0	1	21	1	21	4.38e-06	39.2
mdm_miRNA106	nta-miR171b	100.000	21	0	0	1	21	1	21	4.38e-06	39.2
mdm_miRNA106	ssl-miR171b	100.000	21	0	0	1	21	1	21	4.38e-06	39.2
mdm_miRNA106	gma-miR171k-3p	100.000	21	0	0	1	21	1	21	4.38e-06	39.2
mdm_miRNA106	vvi-miR171f	100.000	21	0	0	1	21	1	21	4.38e-06	39.2
# BLASTN 2.10.1+
# Query: mdm_miRNA107
# Database: /home/leclercqj/Apple/mature_MirBase.fadb
# 0 hits found
# BLASTN 2.10.1+
# Query: mdm_miRNA108
# Database: /home/leclercqj/Apple/mature_MirBase.fadb
# Fields: query acc.ver, subject acc.ver, % identity, alignment length, mismatches, gap opens, q. start, q. end, s. start, s. end, evalue, bit score
# 1 hits found
mdm_miRNA108	mdm-miR11011b	100.000	21	0	0	1	21	1	21	4.38e-06	39.2
# BLASTN 2.10.1+
# Query: mdm_miRNA109
# Database: /home/leclercqj/Apple/mature_MirBase.fadb
# 0 hits found
# BLASTN 2.10.1+
# Query: mdm_miRNA110
# Database: /home/leclercqj/Apple/mature_MirBase.fadb
# 0 hits found
# BLASTN 2.10.1+
# Query: mdm_miRNA111
# Database: /home/leclercqj/Apple/mature_MirBase.fadb
# Fields: query acc.ver, subject acc.ver, % identity, alignment length, mismatches, gap opens, q. start, q. end, s. start, s. end, evalue, bit score
# 50 hits found
mdm_miRNA111	aof-miR393b	100.000	21	0	0	1	21	1	21	4.38e-06	39.2
mdm_miRNA111	csi-miR393c-5p	100.000	21	0	0	1	21	1	21	4.38e-06	39.2
mdm_miRNA111	csi-miR393b-5p	100.000	21	0	0	1	21	2	22	4.38e-06	39.2
mdm_miRNA111	cas-miR393-5p	100.000	21	0	0	1	21	1	21	4.38e-06	39.2
mdm_miRNA111	fve-miR393a	100.000	21	0	0	1	21	1	21	4.38e-06	39.2
mdm_miRNA111	fve-miR393b	100.000	21	0	0	1	21	1	21	4.38e-06	39.2
mdm_miRNA111	vca-miR393-5p	100.000	21	0	0	1	21	1	21	4.38e-06	39.2
mdm_miRNA111	atr-miR393	100.000	21	0	0	1	21	1	21	4.38e-06	39.2
mdm_miRNA111	cpa-miR393	100.000	21	0	0	1	21	1	21	4.38e-06	39.2
mdm_miRNA111	ppe-miR393b	100.000	21	0	0	1	21	1	21	4.38e-06	39.2
mdm_miRNA111	stu-miR393-5p	100.000	21	0	0	1	21	1	21	4.38e-06	39.2
mdm_miRNA111	mes-miR393d	100.000	21	0	0	1	21	1	21	4.38e-06	39.2
mdm_miRNA111	mes-miR393c	100.000	21	0	0	1	21	1	21	4.38e-06	39.2
mdm_miRNA111	mes-miR393b	100.000	21	0	0	1	21	1	21	4.38e-06	39.2
mdm_miRNA111	mes-miR393a	100.000	21	0	0	1	21	1	21	4.38e-06	39.2
mdm_miRNA111	cme-miR393c	100.000	21	0	0	1	21	1	21	4.38e-06	39.2
mdm_miRNA111	cme-miR393b	100.000	21	0	0	1	21	1	21	4.38e-06	39.2
mdm_miRNA111	cme-miR393a	100.000	21	0	0	1	21	1	21	4.38e-06	39.2
mdm_miRNA111	mdm-miR393c	100.000	21	0	0	1	21	1	21	4.38e-06	39.2
mdm_miRNA111	mdm-miR393b	100.000	21	0	0	1	21	1	21	4.38e-06	39.2
mdm_miRNA111	mdm-miR393a	100.000	21	0	0	1	21	1	21	4.38e-06	39.2
mdm_miRNA111	htu-miR393c	100.000	21	0	0	1	21	1	21	4.38e-06	39.2
mdm_miRNA111	htu-miR393b	100.000	21	0	0	1	21	1	21	4.38e-06	39.2
mdm_miRNA111	htu-miR393a	100.000	21	0	0	1	21	1	21	4.38e-06	39.2
mdm_miRNA111	gma-miR393k	100.000	21	0	0	1	21	2	22	4.38e-06	39.2
mdm_miRNA111	gma-miR393j	100.000	21	0	0	1	21	2	22	4.38e-06	39.2
mdm_miRNA111	gma-miR393i	100.000	21	0	0	1	21	2	22	4.38e-06	39.2
mdm_miRNA111	gma-miR393h	100.000	21	0	0	1	21	2	22	4.38e-06	39.2
mdm_miRNA111	gma-miR393g	100.000	21	0	0	1	21	1	21	4.38e-06	39.2
mdm_miRNA111	gma-miR393f	100.000	21	0	0	1	21	1	21	4.38e-06	39.2
mdm_miRNA111	gma-miR393e	100.000	21	0	0	1	21	1	21	4.38e-06	39.2
mdm_miRNA111	gma-miR393d	100.000	21	0	0	1	21	1	21	4.38e-06	39.2
mdm_miRNA111	gma-miR393c-5p	100.000	21	0	0	1	21	1	21	4.38e-06	39.2
mdm_miRNA111	lus-miR393d	100.000	21	0	0	1	21	1	21	4.38e-06	39.2
mdm_miRNA111	lus-miR393c	100.000	21	0	0	1	21	1	21	4.38e-06	39.2
mdm_miRNA111	lus-miR393b	100.000	21	0	0	1	21	1	21	4.38e-06	39.2
mdm_miRNA111	lus-miR393a	100.000	21	0	0	1	21	1	21	4.38e-06	39.2
mdm_miRNA111	bdi-miR393b-5p	100.000	21	0	0	1	21	1	21	4.38e-06	39.2
mdm_miRNA111	bdi-miR393a	100.000	21	0	0	1	21	1	21	4.38e-06	39.2
mdm_miRNA111	tcc-miR393b	100.000	21	0	0	1	21	1	21	4.38e-06	39.2
mdm_miRNA111	tcc-miR393a	100.000	21	0	0	1	21	1	21	4.38e-06	39.2
mdm_miRNA111	csi-miR393a	100.000	21	0	0	1	21	2	22	4.38e-06	39.2
mdm_miRNA111	aly-miR393b-5p	100.000	21	0	0	1	21	1	21	4.38e-06	39.2
mdm_miRNA111	aly-miR393a-5p	100.000	21	0	0	1	21	1	21	4.38e-06	39.2
mdm_miRNA111	ghr-miR393	100.000	21	0	0	1	21	1	21	4.38e-06	39.2
mdm_miRNA111	rco-miR393	100.000	21	0	0	1	21	1	21	4.38e-06	39.2
mdm_miRNA111	zma-miR393c-5p	100.000	21	0	0	1	21	1	21	4.38e-06	39.2
mdm_miRNA111	zma-miR393b-5p	100.000	21	0	0	1	21	1	21	4.38e-06	39.2
mdm_miRNA111	sbi-miR393b	100.000	21	0	0	1	21	1	21	4.38e-06	39.2
mdm_miRNA111	vvi-miR393a	100.000	21	0	0	1	21	1	21	4.38e-06	39.2
# BLASTN 2.10.1+
# Query: mdm_miRNA112
# Database: /home/leclercqj/Apple/mature_MirBase.fadb
# 0 hits found
# BLASTN 2.10.1+
# Query: mdm_miRNA113
# Database: /home/leclercqj/Apple/mature_MirBase.fadb
# 0 hits found
# BLASTN 2.10.1+
# Query: mdm_miRNA114
# Database: /home/leclercqj/Apple/mature_MirBase.fadb
# 0 hits found
# BLASTN 2.10.1+
# Query: mdm_miRNA115
# Database: /home/leclercqj/Apple/mature_MirBase.fadb
# Fields: query acc.ver, subject acc.ver, % identity, alignment length, mismatches, gap opens, q. start, q. end, s. start, s. end, evalue, bit score
# 50 hits found
mdm_miRNA115	aof-miR396b	100.000	21	0	0	1	21	1	21	4.38e-06	39.2
mdm_miRNA115	cas-miR396a	100.000	21	0	0	1	21	1	21	4.38e-06	39.2
mdm_miRNA115	fve-miR396d	100.000	21	0	0	1	21	1	21	4.38e-06	39.2
mdm_miRNA115	fve-miR396c-5p	100.000	21	0	0	1	21	1	21	4.38e-06	39.2
mdm_miRNA115	fve-miR396a-5p	100.000	21	0	0	1	21	1	21	4.38e-06	39.2
mdm_miRNA115	eun-miR396b-5p	100.000	21	0	0	1	21	1	21	4.38e-06	39.2
mdm_miRNA115	ata-miR396e-5p	100.000	21	0	0	1	21	1	21	4.38e-06	39.2
mdm_miRNA115	sly-miR396a-5p	100.000	21	0	0	1	21	1	21	4.38e-06	39.2
mdm_miRNA115	cpa-miR396	100.000	21	0	0	1	21	1	21	4.38e-06	39.2
mdm_miRNA115	mes-miR396b	100.000	21	0	0	1	21	1	21	4.38e-06	39.2
mdm_miRNA115	mes-miR396a	100.000	21	0	0	1	21	1	21	4.38e-06	39.2
mdm_miRNA115	cme-miR396b	100.000	21	0	0	1	21	1	21	4.38e-06	39.2
mdm_miRNA115	mdm-miR396b	100.000	21	0	0	1	21	1	21	4.38e-06	39.2
mdm_miRNA115	hbr-miR396b	100.000	21	0	0	1	21	1	21	4.38e-06	39.2
mdm_miRNA115	nta-miR396a	100.000	21	0	0	1	21	1	21	4.38e-06	39.2
mdm_miRNA115	lus-miR396c	100.000	21	0	0	1	21	1	21	4.38e-06	39.2
mdm_miRNA115	lus-miR396a	100.000	21	0	0	1	21	1	21	4.38e-06	39.2
mdm_miRNA115	dpr-miR396	100.000	21	0	0	1	21	1	21	4.38e-06	39.2
mdm_miRNA115	ssl-miR396	100.000	21	0	0	1	21	1	21	4.38e-06	39.2
mdm_miRNA115	amg-miR396	100.000	21	0	0	1	21	1	21	4.38e-06	39.2
mdm_miRNA115	aau-miR396	100.000	21	0	0	1	21	1	21	4.38e-06	39.2
mdm_miRNA115	gma-miR396i-5p	100.000	21	0	0	1	21	1	21	4.38e-06	39.2
mdm_miRNA115	ssp-miR396	100.000	21	0	0	1	21	1	21	4.38e-06	39.2
mdm_miRNA115	bdi-miR396c-5p	100.000	21	0	0	1	21	1	21	4.38e-06	39.2
mdm_miRNA115	bdi-miR396d-5p	100.000	21	0	0	1	21	1	21	4.38e-06	39.2
mdm_miRNA115	tcc-miR396b	100.000	21	0	0	1	21	1	21	4.38e-06	39.2
mdm_miRNA115	tcc-miR396a	100.000	21	0	0	1	21	1	21	4.38e-06	39.2
mdm_miRNA115	bcy-miR396a	100.000	21	0	0	1	21	1	21	4.38e-06	39.2
mdm_miRNA115	bgy-miR396a	100.000	21	0	0	1	21	1	21	4.38e-06	39.2
mdm_miRNA115	csi-miR396b-5p	100.000	21	0	0	1	21	1	21	4.38e-06	39.2
mdm_miRNA115	csi-miR396a-5p	100.000	21	0	0	1	21	1	21	4.38e-06	39.2
mdm_miRNA115	gma-miR396e	100.000	21	0	0	1	21	1	21	4.38e-06	39.2
mdm_miRNA115	aly-miR396a-5p	100.000	21	0	0	1	21	1	21	4.38e-06	39.2
mdm_miRNA115	aqc-miR396a	100.000	21	0	0	1	21	1	21	4.38e-06	39.2
mdm_miRNA115	lja-miR396	100.000	21	0	0	1	21	1	21	4.38e-06	39.2
mdm_miRNA115	vvi-miR396c	100.000	21	0	0	1	21	1	21	4.38e-06	39.2
mdm_miRNA115	vvi-miR396d	100.000	21	0	0	1	21	1	21	4.38e-06	39.2
mdm_miRNA115	ghr-miR396b	100.000	21	0	0	1	21	1	21	4.38e-06	39.2
mdm_miRNA115	ghr-miR396a	100.000	21	0	0	1	21	1	21	4.38e-06	39.2
mdm_miRNA115	mtr-miR396b-5p	100.000	21	0	0	1	21	1	21	4.38e-06	39.2
mdm_miRNA115	ptc-miR396b	100.000	21	0	0	1	21	1	21	4.38e-06	39.2
mdm_miRNA115	ptc-miR396a	100.000	21	0	0	1	21	1	21	4.38e-06	39.2
mdm_miRNA115	zma-miR396a-5p	100.000	21	0	0	1	21	1	21	4.38e-06	39.2
mdm_miRNA115	zma-miR396b-5p	100.000	21	0	0	1	21	1	21	4.38e-06	39.2
mdm_miRNA115	gma-miR396a-5p	100.000	21	0	0	1	21	1	21	4.38e-06	39.2
mdm_miRNA115	sof-miR396	100.000	21	0	0	1	21	1	21	4.38e-06	39.2
mdm_miRNA115	sbi-miR396a	100.000	21	0	0	1	21	1	21	4.38e-06	39.2
mdm_miRNA115	sbi-miR396b	100.000	21	0	0	1	21	1	21	4.38e-06	39.2
mdm_miRNA115	osa-miR396b-5p	100.000	21	0	0	1	21	1	21	4.38e-06	39.2
mdm_miRNA115	osa-miR396a-5p	100.000	21	0	0	1	21	1	21	4.38e-06	39.2
# BLASTN 2.10.1+
# Query: mdm_miRNA116
# Database: /home/leclercqj/Apple/mature_MirBase.fadb
# 0 hits found
# BLASTN 2.10.1+
# Query: mdm_miRNA117
# Database: /home/leclercqj/Apple/mature_MirBase.fadb
# 0 hits found
# BLASTN 2.10.1+
# Query: mdm_miRNA118
# Database: /home/leclercqj/Apple/mature_MirBase.fadb
# Fields: query acc.ver, subject acc.ver, % identity, alignment length, mismatches, gap opens, q. start, q. end, s. start, s. end, evalue, bit score
# 1 hits found
mdm_miRNA118	osa-miR159f	100.000	21	0	0	1	21	1	21	4.38e-06	39.2
# BLASTN 2.10.1+
# Query: mdm_miRNA119
# Database: /home/leclercqj/Apple/mature_MirBase.fadb
# Fields: query acc.ver, subject acc.ver, % identity, alignment length, mismatches, gap opens, q. start, q. end, s. start, s. end, evalue, bit score
# 9 hits found
mdm_miRNA119	aof-miR166a	100.000	21	0	0	1	21	1	21	4.38e-06	39.2
mdm_miRNA119	csi-miR166g-3p	100.000	21	0	0	1	21	1	21	4.38e-06	39.2
mdm_miRNA119	csi-miR166d-3p	100.000	21	0	0	1	21	1	21	4.38e-06	39.2
mdm_miRNA119	csi-miR166b-3p	100.000	21	0	0	1	21	1	21	4.38e-06	39.2
mdm_miRNA119	pab-miR166e	100.000	21	0	0	1	21	1	21	4.38e-06	39.2
mdm_miRNA119	atr-miR166b	100.000	21	0	0	1	21	1	21	4.38e-06	39.2
mdm_miRNA119	gma-miR166k	100.000	21	0	0	1	21	1	21	4.38e-06	39.2
mdm_miRNA119	bdi-miR166f	100.000	21	0	0	1	21	1	21	4.38e-06	39.2
mdm_miRNA119	gma-miR166h-3p	100.000	21	0	0	1	21	1	21	4.38e-06	39.2
# BLASTN 2.10.1+
# Query: mdm_miRNA120
# Database: /home/leclercqj/Apple/mature_MirBase.fadb
# 0 hits found
# BLASTN 2.10.1+
# Query: mdm_miRNA121
# Database: /home/leclercqj/Apple/mature_MirBase.fadb
# 0 hits found
# BLASTN 2.10.1+
# Query: mdm_miRNA122
# Database: /home/leclercqj/Apple/mature_MirBase.fadb
# Fields: query acc.ver, subject acc.ver, % identity, alignment length, mismatches, gap opens, q. start, q. end, s. start, s. end, evalue, bit score
# 50 hits found
mdm_miRNA122	aof-miR166d	100.000	21	0	0	1	21	1	21	5.01e-06	39.2
mdm_miRNA122	cas-miR166f-3p	100.000	21	0	0	1	21	1	21	5.01e-06	39.2
mdm_miRNA122	cas-miR166d	100.000	21	0	0	1	21	1	21	5.01e-06	39.2
mdm_miRNA122	cas-miR166c-3p	100.000	21	0	0	1	21	1	21	5.01e-06	39.2
mdm_miRNA122	pab-miR166i	100.000	21	0	0	1	21	1	21	5.01e-06	39.2
mdm_miRNA122	pab-miR166h	100.000	21	0	0	1	21	1	21	5.01e-06	39.2
mdm_miRNA122	pab-miR166g	100.000	21	0	0	1	21	1	21	5.01e-06	39.2
mdm_miRNA122	pab-miR166f	100.000	21	0	0	1	21	1	21	5.01e-06	39.2
mdm_miRNA122	fve-miR166f	100.000	21	0	0	1	21	1	21	5.01e-06	39.2
mdm_miRNA122	fve-miR166c	100.000	21	0	0	1	21	1	21	5.01e-06	39.2
mdm_miRNA122	fve-miR166d-3p	100.000	21	0	0	1	21	1	21	5.01e-06	39.2
mdm_miRNA122	fve-miR166b	100.000	21	0	0	1	21	1	21	5.01e-06	39.2
mdm_miRNA122	fve-miR166a	100.000	21	0	0	1	21	1	21	5.01e-06	39.2
mdm_miRNA122	fve-miR166e	100.000	21	0	0	1	21	1	21	5.01e-06	39.2
mdm_miRNA122	lja-miR166-3p	100.000	21	0	0	1	21	4	24	5.01e-06	39.2
mdm_miRNA122	mdm-miR166j	100.000	21	0	0	1	21	1	21	5.01e-06	39.2
mdm_miRNA122	eun-miR166-3p	100.000	21	0	0	1	21	1	21	5.01e-06	39.2
mdm_miRNA122	vca-miR166c-3p	100.000	21	0	0	1	21	1	21	5.01e-06	39.2
mdm_miRNA122	vca-miR166b-3p	100.000	21	0	0	1	21	1	21	5.01e-06	39.2
mdm_miRNA122	vca-miR166a-3p	100.000	21	0	0	1	21	1	21	5.01e-06	39.2
mdm_miRNA122	ata-miR166d-3p	100.000	21	0	0	1	21	1	21	5.01e-06	39.2
mdm_miRNA122	ata-miR166b-3p	100.000	21	0	0	1	21	1	21	5.01e-06	39.2
mdm_miRNA122	ata-miR166e-3p	100.000	21	0	0	1	21	1	21	5.01e-06	39.2
mdm_miRNA122	ata-miR166a-3p	100.000	21	0	0	1	21	1	21	5.01e-06	39.2
mdm_miRNA122	atr-miR166d	100.000	21	0	0	1	21	1	21	5.01e-06	39.2
mdm_miRNA122	atr-miR166c	100.000	21	0	0	1	21	1	21	5.01e-06	39.2
mdm_miRNA122	atr-miR166a	100.000	21	0	0	1	21	1	21	5.01e-06	39.2
mdm_miRNA122	lus-miR166k	100.000	21	0	0	1	21	1	21	5.01e-06	39.2
mdm_miRNA122	lus-miR166j	100.000	21	0	0	1	21	1	21	5.01e-06	39.2
mdm_miRNA122	cpa-miR166c	100.000	21	0	0	1	21	1	21	5.01e-06	39.2
mdm_miRNA122	cpa-miR166b	100.000	21	0	0	1	21	1	21	5.01e-06	39.2
mdm_miRNA122	cpa-miR166a	100.000	21	0	0	1	21	1	21	5.01e-06	39.2
mdm_miRNA122	ppe-miR166e	100.000	21	0	0	1	21	1	21	5.01e-06	39.2
mdm_miRNA122	ppe-miR166d	100.000	21	0	0	1	21	1	21	5.01e-06	39.2
mdm_miRNA122	ppe-miR166c	100.000	21	0	0	1	21	1	21	5.01e-06	39.2
mdm_miRNA122	ppe-miR166b	100.000	21	0	0	1	21	1	21	5.01e-06	39.2
mdm_miRNA122	ppe-miR166a	100.000	21	0	0	1	21	1	21	5.01e-06	39.2
mdm_miRNA122	aly-miR166h-3p	100.000	21	0	0	1	21	1	21	5.01e-06	39.2
mdm_miRNA122	stu-miR166d-3p	100.000	21	0	0	1	21	1	21	5.01e-06	39.2
mdm_miRNA122	stu-miR166c-3p	100.000	21	0	0	1	21	1	21	5.01e-06	39.2
mdm_miRNA122	stu-miR166a-3p	100.000	21	0	0	1	21	1	21	5.01e-06	39.2
mdm_miRNA122	ssp-miR166	100.000	21	0	0	1	21	1	21	5.01e-06	39.2
mdm_miRNA122	bdi-miR166i-3p	100.000	21	0	0	1	21	1	21	5.01e-06	39.2
mdm_miRNA122	mes-miR166g	100.000	21	0	0	1	21	1	21	5.01e-06	39.2
mdm_miRNA122	mes-miR166f	100.000	21	0	0	1	21	1	21	5.01e-06	39.2
mdm_miRNA122	mes-miR166e	100.000	21	0	0	1	21	1	21	5.01e-06	39.2
mdm_miRNA122	mes-miR166d	100.000	21	0	0	1	21	1	21	5.01e-06	39.2
mdm_miRNA122	mes-miR166c	100.000	21	0	0	1	21	1	21	5.01e-06	39.2
mdm_miRNA122	mes-miR166b	100.000	21	0	0	1	21	1	21	5.01e-06	39.2
mdm_miRNA122	mes-miR166a	100.000	21	0	0	1	21	1	21	5.01e-06	39.2
# BLASTN 2.10.1+
# Query: mdm_miRNA123
# Database: /home/leclercqj/Apple/mature_MirBase.fadb
# 0 hits found
# BLASTN 2.10.1+
# Query: mdm_miRNA124
# Database: /home/leclercqj/Apple/mature_MirBase.fadb
# 0 hits found
# BLASTN 2.10.1+
# Query: mdm_miRNA125
# Database: /home/leclercqj/Apple/mature_MirBase.fadb
# 0 hits found
# BLASTN 2.10.1+
# Query: mdm_miRNA126
# Database: /home/leclercqj/Apple/mature_MirBase.fadb
# Fields: query acc.ver, subject acc.ver, % identity, alignment length, mismatches, gap opens, q. start, q. end, s. start, s. end, evalue, bit score
# 18 hits found
mdm_miRNA126	bdi-miR159b-3p.1	100.000	21	0	0	1	21	1	21	4.38e-06	39.2
mdm_miRNA126	ssp-miR159a	100.000	21	0	0	1	21	1	21	4.38e-06	39.2
mdm_miRNA126	far-miR159	100.000	21	0	0	1	21	1	21	4.38e-06	39.2
mdm_miRNA126	hvu-miR159a	100.000	21	0	0	1	21	1	21	4.38e-06	39.2
mdm_miRNA126	hvu-miR159b	100.000	21	0	0	1	21	1	21	4.38e-06	39.2
mdm_miRNA126	zma-miR159k-3p	100.000	21	0	0	1	21	1	21	4.38e-06	39.2
mdm_miRNA126	zma-miR159j-3p	100.000	21	0	0	1	21	1	21	4.38e-06	39.2
mdm_miRNA126	zma-miR159f-3p	100.000	21	0	0	1	21	1	21	4.38e-06	39.2
mdm_miRNA126	tae-miR159b	100.000	21	0	0	1	21	1	21	4.38e-06	39.2
mdm_miRNA126	tae-miR159a	100.000	21	0	0	1	21	1	21	4.38e-06	39.2
mdm_miRNA126	zma-miR159b-3p	100.000	21	0	0	1	21	1	21	4.38e-06	39.2
mdm_miRNA126	zma-miR159a-3p	100.000	21	0	0	1	21	1	21	4.38e-06	39.2
mdm_miRNA126	sof-miR159d	100.000	21	0	0	1	21	1	21	4.38e-06	39.2
mdm_miRNA126	sof-miR159b	100.000	21	0	0	1	21	1	21	4.38e-06	39.2
mdm_miRNA126	sof-miR159a	100.000	21	0	0	1	21	1	21	4.38e-06	39.2
mdm_miRNA126	sbi-miR159a	100.000	21	0	0	1	21	1	21	4.38e-06	39.2
mdm_miRNA126	osa-miR159b	100.000	21	0	0	1	21	1	21	4.38e-06	39.2
mdm_miRNA126	osa-miR159a.1	100.000	21	0	0	1	21	1	21	4.38e-06	39.2
# BLASTN 2.10.1+
# Query: mdm_miRNA127
# Database: /home/leclercqj/Apple/mature_MirBase.fadb
# Fields: query acc.ver, subject acc.ver, % identity, alignment length, mismatches, gap opens, q. start, q. end, s. start, s. end, evalue, bit score
# 1 hits found
mdm_miRNA127	mdm-miR10984b-3p	100.000	22	0	0	1	22	1	22	1.43e-06	41.0
# BLASTN 2.10.1+
# Query: mdm_miRNA128
# Database: /home/leclercqj/Apple/mature_MirBase.fadb
# 0 hits found
# BLASTN 2.10.1+
# Query: mdm_miRNA129
# Database: /home/leclercqj/Apple/mature_MirBase.fadb
# Fields: query acc.ver, subject acc.ver, % identity, alignment length, mismatches, gap opens, q. start, q. end, s. start, s. end, evalue, bit score
# 1 hits found
mdm_miRNA129	aqc-miR159	100.000	21	0	0	1	21	1	21	4.38e-06	39.2
# BLASTN 2.10.1+
# Query: mdm_miRNA130
# Database: /home/leclercqj/Apple/mature_MirBase.fadb
# Fields: query acc.ver, subject acc.ver, % identity, alignment length, mismatches, gap opens, q. start, q. end, s. start, s. end, evalue, bit score
# 4 hits found
mdm_miRNA130	csi-miR159c-3p	100.000	21	0	0	1	21	1	21	4.38e-06	39.2
mdm_miRNA130	ppt-miR319e	100.000	21	0	0	1	21	1	21	4.38e-06	39.2
mdm_miRNA130	ppt-miR319d-3p	100.000	21	0	0	1	21	1	21	4.38e-06	39.2
mdm_miRNA130	ppt-miR319c	100.000	21	0	0	1	21	1	21	4.38e-06	39.2
# BLASTN 2.10.1+
# Query: mdm_miRNA131
# Database: /home/leclercqj/Apple/mature_MirBase.fadb
# Fields: query acc.ver, subject acc.ver, % identity, alignment length, mismatches, gap opens, q. start, q. end, s. start, s. end, evalue, bit score
# 1 hits found
mdm_miRNA131	mdm-miR11005	100.000	22	0	0	1	22	1	22	1.43e-06	41.0
# BLASTN 2.10.1+
# Query: mdm_miRNA132
# Database: /home/leclercqj/Apple/mature_MirBase.fadb
# 0 hits found
# BLASTN 2.10.1+
# Query: mdm_miRNA133
# Database: /home/leclercqj/Apple/mature_MirBase.fadb
# 0 hits found
# BLASTN 2.10.1+
# Query: mdm_miRNA134
# Database: /home/leclercqj/Apple/mature_MirBase.fadb
# 0 hits found
# BLASTN 2.10.1+
# Query: mdm_miRNA135
# Database: /home/leclercqj/Apple/mature_MirBase.fadb
# 0 hits found
# BLASTN 2.10.1+
# Query: mdm_miRNA136
# Database: /home/leclercqj/Apple/mature_MirBase.fadb
# 0 hits found
# BLASTN 2.10.1+
# Query: mdm_miRNA137
# Database: /home/leclercqj/Apple/mature_MirBase.fadb
# 0 hits found
# BLASTN 2.10.1+
# Query: mdm_miRNA138
# Database: /home/leclercqj/Apple/mature_MirBase.fadb
# Fields: query acc.ver, subject acc.ver, % identity, alignment length, mismatches, gap opens, q. start, q. end, s. start, s. end, evalue, bit score
# 1 hits found
mdm_miRNA138	mdm-miR11015	100.000	21	0	0	1	21	1	21	4.38e-06	39.2
# BLASTN 2.10.1+
# Query: mdm_miRNA139
# Database: /home/leclercqj/Apple/mature_MirBase.fadb
# Fields: query acc.ver, subject acc.ver, % identity, alignment length, mismatches, gap opens, q. start, q. end, s. start, s. end, evalue, bit score
# 1 hits found
mdm_miRNA139	mdm-miR11011a	100.000	21	0	0	1	21	1	21	4.38e-06	39.2
# BLASTN 2.10.1+
# Query: mdm_miRNA140
# Database: /home/leclercqj/Apple/mature_MirBase.fadb
# 0 hits found
# BLASTN 2.10.1+
# Query: mdm_miRNA141
# Database: /home/leclercqj/Apple/mature_MirBase.fadb
# 0 hits found
# BLASTN 2.10.1+
# Query: mdm_miRNA142
# Database: /home/leclercqj/Apple/mature_MirBase.fadb
# 0 hits found
# BLASTN 2.10.1+
# Query: mdm_miRNA143
# Database: /home/leclercqj/Apple/mature_MirBase.fadb
# Fields: query acc.ver, subject acc.ver, % identity, alignment length, mismatches, gap opens, q. start, q. end, s. start, s. end, evalue, bit score
# 4 hits found
mdm_miRNA143	mdm-miR10982d	100.000	22	0	0	1	22	1	22	1.43e-06	41.0
mdm_miRNA143	mdm-miR10982c	100.000	22	0	0	1	22	1	22	1.43e-06	41.0
mdm_miRNA143	mdm-miR10982b	100.000	22	0	0	1	22	1	22	1.43e-06	41.0
mdm_miRNA143	mdm-miR10982a	100.000	22	0	0	1	22	1	22	1.43e-06	41.0
# BLASTN 2.10.1+
# Query: mdm_miRNA144
# Database: /home/leclercqj/Apple/mature_MirBase.fadb
# Fields: query acc.ver, subject acc.ver, % identity, alignment length, mismatches, gap opens, q. start, q. end, s. start, s. end, evalue, bit score
# 29 hits found
mdm_miRNA144	aof-miR399a	100.000	21	0	0	1	21	1	21	4.38e-06	39.2
mdm_miRNA144	pab-miR399d	100.000	21	0	0	1	21	1	21	4.38e-06	39.2
mdm_miRNA144	fve-miR399a	100.000	21	0	0	1	21	1	21	4.38e-06	39.2
mdm_miRNA144	mes-miR399f	100.000	21	0	0	1	21	1	21	4.38e-06	39.2
mdm_miRNA144	mdm-miR399j	100.000	21	0	0	1	21	1	21	4.38e-06	39.2
mdm_miRNA144	mdm-miR399i	100.000	21	0	0	1	21	1	21	4.38e-06	39.2
mdm_miRNA144	gma-miR399h	100.000	21	0	0	1	21	1	21	4.38e-06	39.2
mdm_miRNA144	gma-miR399c	100.000	21	0	0	1	21	1	21	4.38e-06	39.2
mdm_miRNA144	gma-miR399b	100.000	21	0	0	1	21	1	21	4.38e-06	39.2
mdm_miRNA144	gma-miR399a	100.000	21	0	0	1	21	1	21	4.38e-06	39.2
mdm_miRNA144	vun-miR399a	100.000	21	0	0	1	21	1	21	4.38e-06	39.2
mdm_miRNA144	tcc-miR399i	100.000	21	0	0	1	21	1	21	4.38e-06	39.2
mdm_miRNA144	csi-miR399d-3p	100.000	21	0	0	1	21	1	21	4.38e-06	39.2
mdm_miRNA144	aly-miR399c-3p	100.000	21	0	0	1	21	1	21	4.38e-06	39.2
mdm_miRNA144	aly-miR399b-3p	100.000	21	0	0	1	21	1	21	4.38e-06	39.2
mdm_miRNA144	rco-miR399a	100.000	21	0	0	1	21	1	21	4.38e-06	39.2
mdm_miRNA144	zma-miR399j-3p	100.000	21	0	0	1	21	1	21	4.38e-06	39.2
mdm_miRNA144	zma-miR399i-3p	100.000	21	0	0	1	21	1	21	4.38e-06	39.2
mdm_miRNA144	pvu-miR399a	100.000	21	0	0	1	21	1	21	4.38e-06	39.2
mdm_miRNA144	vvi-miR399c	100.000	21	0	0	1	21	1	21	4.38e-06	39.2
mdm_miRNA144	vvi-miR399b	100.000	21	0	0	1	21	1	21	4.38e-06	39.2
mdm_miRNA144	mtr-miR399p	100.000	21	0	0	1	21	1	21	4.38e-06	39.2
mdm_miRNA144	mtr-miR399l	100.000	21	0	0	1	21	1	21	4.38e-06	39.2
mdm_miRNA144	sbi-miR399i	100.000	21	0	0	1	21	1	21	4.38e-06	39.2
mdm_miRNA144	zma-miR399e-3p	100.000	21	0	0	1	21	1	21	4.38e-06	39.2
mdm_miRNA144	sbi-miR399d	100.000	21	0	0	1	21	1	21	4.38e-06	39.2
mdm_miRNA144	osa-miR399d	100.000	21	0	0	1	21	1	21	4.38e-06	39.2
mdm_miRNA144	ath-miR399c-3p	100.000	21	0	0	1	21	1	21	4.38e-06	39.2
mdm_miRNA144	ath-miR399b	100.000	21	0	0	1	21	1	21	4.38e-06	39.2
# BLASTN 2.10.1+
# Query: mdm_miRNA145
# Database: /home/leclercqj/Apple/mature_MirBase.fadb
# 0 hits found
# BLASTN 2.10.1+
# Query: mdm_miRNA146
# Database: /home/leclercqj/Apple/mature_MirBase.fadb
# Fields: query acc.ver, subject acc.ver, % identity, alignment length, mismatches, gap opens, q. start, q. end, s. start, s. end, evalue, bit score
# 9 hits found
mdm_miRNA146	sly-miR319c-3p	100.000	21	0	0	1	21	1	21	4.38e-06	39.2
mdm_miRNA146	mes-miR319g	100.000	21	0	0	1	21	1	21	4.38e-06	39.2
mdm_miRNA146	gma-miR319l	100.000	21	0	0	1	21	1	21	4.38e-06	39.2
mdm_miRNA146	gma-miR319g	100.000	21	0	0	1	21	1	21	4.38e-06	39.2
mdm_miRNA146	aly-miR319d-3p	100.000	21	0	0	1	21	1	21	4.38e-06	39.2
mdm_miRNA146	aly-miR319c-3p	100.000	21	0	0	1	21	1	21	4.38e-06	39.2
mdm_miRNA146	rco-miR319d	100.000	21	0	0	1	21	1	21	4.38e-06	39.2
mdm_miRNA146	pvu-miR319c	100.000	21	0	0	1	21	1	21	4.38e-06	39.2
mdm_miRNA146	ath-miR319c	100.000	21	0	0	1	21	1	21	4.38e-06	39.2
# BLASTN 2.10.1+
# Query: mdm_miRNA147
# Database: /home/leclercqj/Apple/mature_MirBase.fadb
# 0 hits found
# BLASTN 2.10.1+
# Query: mdm_miRNA148
# Database: /home/leclercqj/Apple/mature_MirBase.fadb
# 0 hits found
# BLASTN 2.10.1+
# Query: mdm_miRNA149
# Database: /home/leclercqj/Apple/mature_MirBase.fadb
# Fields: query acc.ver, subject acc.ver, % identity, alignment length, mismatches, gap opens, q. start, q. end, s. start, s. end, evalue, bit score
# 2 hits found
mdm_miRNA149	mdm-miR7124b	100.000	21	0	0	1	21	1	21	4.38e-06	39.2
mdm_miRNA149	mdm-miR7124a	100.000	21	0	0	1	21	1	21	4.38e-06	39.2
# BLASTN 2.10.1+
# Query: mdm_miRNA150
# Database: /home/leclercqj/Apple/mature_MirBase.fadb
# Fields: query acc.ver, subject acc.ver, % identity, alignment length, mismatches, gap opens, q. start, q. end, s. start, s. end, evalue, bit score
# 2 hits found
mdm_miRNA150	mdm-miR7122b	100.000	22	0	0	1	22	1	22	1.43e-06	41.0
mdm_miRNA150	mdm-miR7122a	100.000	22	0	0	1	22	1	22	1.43e-06	41.0
# BLASTN 2.10.1+
# Query: mdm_miRNA151
# Database: /home/leclercqj/Apple/mature_MirBase.fadb
# Fields: query acc.ver, subject acc.ver, % identity, alignment length, mismatches, gap opens, q. start, q. end, s. start, s. end, evalue, bit score
# 50 hits found
mdm_miRNA151	lja-miR166-3p	100.000	22	0	0	1	22	3	24	1.43e-06	41.0
mdm_miRNA151	aof-miR166d	100.000	21	0	0	2	22	1	21	5.01e-06	39.2
mdm_miRNA151	cas-miR166f-3p	100.000	21	0	0	2	22	1	21	5.01e-06	39.2
mdm_miRNA151	cas-miR166d	100.000	21	0	0	2	22	1	21	5.01e-06	39.2
mdm_miRNA151	cas-miR166c-3p	100.000	21	0	0	2	22	1	21	5.01e-06	39.2
mdm_miRNA151	pab-miR166i	100.000	21	0	0	2	22	1	21	5.01e-06	39.2
mdm_miRNA151	pab-miR166h	100.000	21	0	0	2	22	1	21	5.01e-06	39.2
mdm_miRNA151	pab-miR166g	100.000	21	0	0	2	22	1	21	5.01e-06	39.2
mdm_miRNA151	pab-miR166f	100.000	21	0	0	2	22	1	21	5.01e-06	39.2
mdm_miRNA151	fve-miR166f	100.000	21	0	0	2	22	1	21	5.01e-06	39.2
mdm_miRNA151	fve-miR166c	100.000	21	0	0	2	22	1	21	5.01e-06	39.2
mdm_miRNA151	fve-miR166d-3p	100.000	21	0	0	2	22	1	21	5.01e-06	39.2
mdm_miRNA151	fve-miR166b	100.000	21	0	0	2	22	1	21	5.01e-06	39.2
mdm_miRNA151	fve-miR166a	100.000	21	0	0	2	22	1	21	5.01e-06	39.2
mdm_miRNA151	fve-miR166e	100.000	21	0	0	2	22	1	21	5.01e-06	39.2
mdm_miRNA151	mdm-miR166j	100.000	21	0	0	2	22	1	21	5.01e-06	39.2
mdm_miRNA151	eun-miR166-3p	100.000	21	0	0	2	22	1	21	5.01e-06	39.2
mdm_miRNA151	vca-miR166c-3p	100.000	21	0	0	2	22	1	21	5.01e-06	39.2
mdm_miRNA151	vca-miR166b-3p	100.000	21	0	0	2	22	1	21	5.01e-06	39.2
mdm_miRNA151	vca-miR166a-3p	100.000	21	0	0	2	22	1	21	5.01e-06	39.2
mdm_miRNA151	ata-miR166d-3p	100.000	21	0	0	2	22	1	21	5.01e-06	39.2
mdm_miRNA151	ata-miR166b-3p	100.000	21	0	0	2	22	1	21	5.01e-06	39.2
mdm_miRNA151	ata-miR166e-3p	100.000	21	0	0	2	22	1	21	5.01e-06	39.2
mdm_miRNA151	ata-miR166a-3p	100.000	21	0	0	2	22	1	21	5.01e-06	39.2
mdm_miRNA151	atr-miR166d	100.000	21	0	0	2	22	1	21	5.01e-06	39.2
mdm_miRNA151	atr-miR166c	100.000	21	0	0	2	22	1	21	5.01e-06	39.2
mdm_miRNA151	atr-miR166a	100.000	21	0	0	2	22	1	21	5.01e-06	39.2
mdm_miRNA151	lus-miR166k	100.000	21	0	0	2	22	1	21	5.01e-06	39.2
mdm_miRNA151	lus-miR166j	100.000	21	0	0	2	22	1	21	5.01e-06	39.2
mdm_miRNA151	cpa-miR166c	100.000	21	0	0	2	22	1	21	5.01e-06	39.2
mdm_miRNA151	cpa-miR166b	100.000	21	0	0	2	22	1	21	5.01e-06	39.2
mdm_miRNA151	cpa-miR166a	100.000	21	0	0	2	22	1	21	5.01e-06	39.2
mdm_miRNA151	ppe-miR166e	100.000	21	0	0	2	22	1	21	5.01e-06	39.2
mdm_miRNA151	ppe-miR166d	100.000	21	0	0	2	22	1	21	5.01e-06	39.2
mdm_miRNA151	ppe-miR166c	100.000	21	0	0	2	22	1	21	5.01e-06	39.2
mdm_miRNA151	ppe-miR166b	100.000	21	0	0	2	22	1	21	5.01e-06	39.2
mdm_miRNA151	ppe-miR166a	100.000	21	0	0	2	22	1	21	5.01e-06	39.2
mdm_miRNA151	aly-miR166h-3p	100.000	21	0	0	2	22	1	21	5.01e-06	39.2
mdm_miRNA151	stu-miR166d-3p	100.000	21	0	0	2	22	1	21	5.01e-06	39.2
mdm_miRNA151	stu-miR166c-3p	100.000	21	0	0	2	22	1	21	5.01e-06	39.2
mdm_miRNA151	stu-miR166a-3p	100.000	21	0	0	2	22	1	21	5.01e-06	39.2
mdm_miRNA151	ssp-miR166	100.000	21	0	0	2	22	1	21	5.01e-06	39.2
mdm_miRNA151	bdi-miR166i-3p	100.000	21	0	0	2	22	1	21	5.01e-06	39.2
mdm_miRNA151	mes-miR166g	100.000	21	0	0	2	22	1	21	5.01e-06	39.2
mdm_miRNA151	mes-miR166f	100.000	21	0	0	2	22	1	21	5.01e-06	39.2
mdm_miRNA151	mes-miR166e	100.000	21	0	0	2	22	1	21	5.01e-06	39.2
mdm_miRNA151	mes-miR166d	100.000	21	0	0	2	22	1	21	5.01e-06	39.2
mdm_miRNA151	mes-miR166c	100.000	21	0	0	2	22	1	21	5.01e-06	39.2
mdm_miRNA151	mes-miR166b	100.000	21	0	0	2	22	1	21	5.01e-06	39.2
mdm_miRNA151	mes-miR166a	100.000	21	0	0	2	22	1	21	5.01e-06	39.2
# BLASTN 2.10.1+
# Query: mdm_miRNA152
# Database: /home/leclercqj/Apple/mature_MirBase.fadb
# 0 hits found
# BLASTN 2.10.1+
# Query: mdm_miRNA153
# Database: /home/leclercqj/Apple/mature_MirBase.fadb
# 0 hits found
# BLASTN 2.10.1+
# Query: mdm_miRNA154
# Database: /home/leclercqj/Apple/mature_MirBase.fadb
# Fields: query acc.ver, subject acc.ver, % identity, alignment length, mismatches, gap opens, q. start, q. end, s. start, s. end, evalue, bit score
# 1 hits found
mdm_miRNA154	mdm-miR477b	100.000	22	0	0	1	22	1	22	1.43e-06	41.0
# BLASTN 2.10.1+
# Query: mdm_miRNA155
# Database: /home/leclercqj/Apple/mature_MirBase.fadb
# Fields: query acc.ver, subject acc.ver, % identity, alignment length, mismatches, gap opens, q. start, q. end, s. start, s. end, evalue, bit score
# 16 hits found
mdm_miRNA155	pab-miR396t	100.000	21	0	0	1	21	1	21	4.38e-06	39.2
mdm_miRNA155	pab-miR396s	100.000	21	0	0	1	21	1	21	4.38e-06	39.2
mdm_miRNA155	pab-miR396r	100.000	21	0	0	1	21	1	21	4.38e-06	39.2
mdm_miRNA155	pab-miR396q	100.000	21	0	0	1	21	1	21	4.38e-06	39.2
mdm_miRNA155	pab-miR396p	100.000	21	0	0	1	21	1	21	4.38e-06	39.2
mdm_miRNA155	pab-miR396o	100.000	21	0	0	1	21	1	21	4.38e-06	39.2
mdm_miRNA155	pab-miR396n	100.000	21	0	0	1	21	1	21	4.38e-06	39.2
mdm_miRNA155	pab-miR396m	100.000	21	0	0	1	21	1	21	4.38e-06	39.2
mdm_miRNA155	pab-miR396l	100.000	21	0	0	1	21	1	21	4.38e-06	39.2
mdm_miRNA155	pab-miR396k	100.000	21	0	0	1	21	1	21	4.38e-06	39.2
mdm_miRNA155	pab-miR396j	100.000	21	0	0	1	21	1	21	4.38e-06	39.2
mdm_miRNA155	pab-miR396i	100.000	21	0	0	1	21	1	21	4.38e-06	39.2
mdm_miRNA155	tcc-miR396d	100.000	21	0	0	1	21	1	21	4.38e-06	39.2
mdm_miRNA155	pab-miR396c	100.000	21	0	0	1	21	1	21	4.38e-06	39.2
mdm_miRNA155	pab-miR396b	100.000	21	0	0	1	21	1	21	4.38e-06	39.2
mdm_miRNA155	ptc-miR396g-5p	100.000	21	0	0	1	21	1	21	4.38e-06	39.2
# BLASTN 2.10.1+
# Query: mdm_miRNA156
# Database: /home/leclercqj/Apple/mature_MirBase.fadb
# 0 hits found
# BLASTN 2.10.1+
# Query: mdm_miRNA157
# Database: /home/leclercqj/Apple/mature_MirBase.fadb
# 0 hits found
# BLASTN 2.10.1+
# Query: mdm_miRNA158
# Database: /home/leclercqj/Apple/mature_MirBase.fadb
# 0 hits found
# BLASTN 2.10.1+
# Query: mdm_miRNA159
# Database: /home/leclercqj/Apple/mature_MirBase.fadb
# 0 hits found
# BLASTN 2.10.1+
# Query: mdm_miRNA160
# Database: /home/leclercqj/Apple/mature_MirBase.fadb
# Fields: query acc.ver, subject acc.ver, % identity, alignment length, mismatches, gap opens, q. start, q. end, s. start, s. end, evalue, bit score
# 2 hits found
mdm_miRNA160	csi-miR858-3p	100.000	21	0	0	1	21	1	21	4.38e-06	39.2
mdm_miRNA160	ppe-miR858	100.000	21	0	0	1	21	1	21	4.38e-06	39.2
# BLASTN 2.10.1+
# Query: mdm_miRNA161
# Database: /home/leclercqj/Apple/mature_MirBase.fadb
# Fields: query acc.ver, subject acc.ver, % identity, alignment length, mismatches, gap opens, q. start, q. end, s. start, s. end, evalue, bit score
# 8 hits found
mdm_miRNA161	mes-miR156k	100.000	21	0	0	1	21	1	21	4.38e-06	39.2
mdm_miRNA161	mdm-miR156w	100.000	21	0	0	1	21	1	21	4.38e-06	39.2
mdm_miRNA161	mdm-miR156v	100.000	21	0	0	1	21	1	21	4.38e-06	39.2
mdm_miRNA161	mdm-miR156u	100.000	21	0	0	1	21	1	21	4.38e-06	39.2
mdm_miRNA161	mdm-miR156t	100.000	21	0	0	1	21	1	21	4.38e-06	39.2
mdm_miRNA161	far-miR156b	100.000	21	0	0	1	21	1	21	4.38e-06	39.2
mdm_miRNA161	gma-miR156f	100.000	21	0	0	1	21	1	21	4.38e-06	39.2
mdm_miRNA161	ahy-miR156c	100.000	21	0	0	1	21	1	21	4.38e-06	39.2
# BLASTN 2.10.1+
# Query: mdm_miRNA162
# Database: /home/leclercqj/Apple/mature_MirBase.fadb
# Fields: query acc.ver, subject acc.ver, % identity, alignment length, mismatches, gap opens, q. start, q. end, s. start, s. end, evalue, bit score
# 1 hits found
mdm_miRNA162	mdm-miR482a-5p	100.000	22	0	0	1	22	1	22	1.43e-06	41.0
# BLASTN 2.10.1+
# Query: mdm_miRNA163
# Database: /home/leclercqj/Apple/mature_MirBase.fadb
# Fields: query acc.ver, subject acc.ver, % identity, alignment length, mismatches, gap opens, q. start, q. end, s. start, s. end, evalue, bit score
# 16 hits found
mdm_miRNA163	cpa-miR167c	100.000	21	0	0	1	21	1	21	4.38e-06	39.2
mdm_miRNA163	ppe-miR167d	100.000	21	0	0	1	21	1	21	4.38e-06	39.2
mdm_miRNA163	mes-miR167h	100.000	21	0	0	1	21	1	21	4.38e-06	39.2
mdm_miRNA163	mes-miR167g	100.000	21	0	0	1	21	1	21	4.38e-06	39.2
mdm_miRNA163	cme-miR167c	100.000	21	0	0	1	21	1	21	4.38e-06	39.2
mdm_miRNA163	mdm-miR167j	100.000	21	0	0	1	21	1	21	4.38e-06	39.2
mdm_miRNA163	mdm-miR167i	100.000	21	0	0	1	21	1	21	4.38e-06	39.2
mdm_miRNA163	mdm-miR167h	100.000	21	0	0	1	21	1	21	4.38e-06	39.2
mdm_miRNA163	lus-miR167b	100.000	21	0	0	1	21	1	21	4.38e-06	39.2
mdm_miRNA163	tcc-miR167c	100.000	21	0	0	1	21	1	21	4.38e-06	39.2
mdm_miRNA163	csi-miR167b-5p	100.000	21	0	0	1	21	1	21	4.38e-06	39.2
mdm_miRNA163	ahy-miR167-5p	100.000	21	0	0	1	21	1	21	4.38e-06	39.2
mdm_miRNA163	gma-miR167f	100.000	21	0	0	1	21	1	21	4.38e-06	39.2
mdm_miRNA163	gma-miR167e	100.000	21	0	0	1	21	1	21	4.38e-06	39.2
mdm_miRNA163	ptc-miR167g-5p	100.000	21	0	0	1	21	1	21	4.38e-06	39.2
mdm_miRNA163	ptc-miR167f-5p	100.000	21	0	0	1	21	1	21	4.38e-06	39.2
# BLASTN 2.10.1+
# Query: mdm_miRNA164
# Database: /home/leclercqj/Apple/mature_MirBase.fadb
# 0 hits found
# BLASTN 2.10.1+
# Query: mdm_miRNA165
# Database: /home/leclercqj/Apple/mature_MirBase.fadb
# 0 hits found
# BLASTN 2.10.1+
# Query: mdm_miRNA166
# Database: /home/leclercqj/Apple/mature_MirBase.fadb
# 0 hits found
# BLASTN 2.10.1+
# Query: mdm_miRNA167
# Database: /home/leclercqj/Apple/mature_MirBase.fadb
# Fields: query acc.ver, subject acc.ver, % identity, alignment length, mismatches, gap opens, q. start, q. end, s. start, s. end, evalue, bit score
# 1 hits found
mdm_miRNA167	mdm-miR827	100.000	21	0	0	1	21	1	21	4.38e-06	39.2
# BLASTN 2.10.1+
# Query: mdm_miRNA168
# Database: /home/leclercqj/Apple/mature_MirBase.fadb
# 0 hits found
# BLASTN 2.10.1+
# Query: mdm_miRNA169
# Database: /home/leclercqj/Apple/mature_MirBase.fadb
# 0 hits found
# BLASTN 2.10.1+
# Query: mdm_miRNA170
# Database: /home/leclercqj/Apple/mature_MirBase.fadb
# 0 hits found
# BLASTN 2.10.1+
# Query: mdm_miRNA171
# Database: /home/leclercqj/Apple/mature_MirBase.fadb
# 0 hits found
# BLASTN 2.10.1+
# Query: mdm_miRNA172
# Database: /home/leclercqj/Apple/mature_MirBase.fadb
# 0 hits found
# BLASTN 2.10.1+
# Query: mdm_miRNA173
# Database: /home/leclercqj/Apple/mature_MirBase.fadb
# 0 hits found
# BLASTN 2.10.1+
# Query: mdm_miRNA174
# Database: /home/leclercqj/Apple/mature_MirBase.fadb
# Fields: query acc.ver, subject acc.ver, % identity, alignment length, mismatches, gap opens, q. start, q. end, s. start, s. end, evalue, bit score
# 1 hits found
mdm_miRNA174	mdm-miR391	100.000	21	0	0	1	21	1	21	4.38e-06	39.2
# BLASTN 2.10.1+
# Query: mdm_miRNA175
# Database: /home/leclercqj/Apple/mature_MirBase.fadb
# 0 hits found
# BLASTN 2.10.1+
# Query: mdm_miRNA176
# Database: /home/leclercqj/Apple/mature_MirBase.fadb
# 0 hits found
# BLASTN 2.10.1+
# Query: mdm_miRNA177
# Database: /home/leclercqj/Apple/mature_MirBase.fadb
# 0 hits found
# BLASTN 2.10.1+
# Query: mdm_miRNA178
# Database: /home/leclercqj/Apple/mature_MirBase.fadb
# 0 hits found
# BLASTN 2.10.1+
# Query: mdm_miRNA179
# Database: /home/leclercqj/Apple/mature_MirBase.fadb
# Fields: query acc.ver, subject acc.ver, % identity, alignment length, mismatches, gap opens, q. start, q. end, s. start, s. end, evalue, bit score
# 2 hits found
mdm_miRNA179	mdm-miR319h	100.000	22	0	0	1	22	1	22	1.43e-06	41.0
mdm_miRNA179	mdm-miR319c-5p	100.000	22	0	0	1	22	1	22	1.43e-06	41.0
# BLASTN 2.10.1+
# Query: mdm_miRNA180
# Database: /home/leclercqj/Apple/mature_MirBase.fadb
# Fields: query acc.ver, subject acc.ver, % identity, alignment length, mismatches, gap opens, q. start, q. end, s. start, s. end, evalue, bit score
# 2 hits found
mdm_miRNA180	mdm-miR5225b	100.000	22	0	0	1	22	1	22	1.43e-06	41.0
mdm_miRNA180	mdm-miR5225a	100.000	22	0	0	1	22	1	22	1.43e-06	41.0
# BLASTN 2.10.1+
# Query: mdm_miRNA181
# Database: /home/leclercqj/Apple/mature_MirBase.fadb
# 0 hits found
# BLASTN 2.10.1+
# Query: mdm_miRNA182
# Database: /home/leclercqj/Apple/mature_MirBase.fadb
# Fields: query acc.ver, subject acc.ver, % identity, alignment length, mismatches, gap opens, q. start, q. end, s. start, s. end, evalue, bit score
# 2 hits found
mdm_miRNA182	mdm-miR7120b-5p	100.000	21	0	0	1	21	1	21	4.38e-06	39.2
mdm_miRNA182	mdm-miR7120a-5p	100.000	21	0	0	1	21	1	21	4.38e-06	39.2
# BLASTN 2.10.1+
# Query: mdm_miRNA183
# Database: /home/leclercqj/Apple/mature_MirBase.fadb
# Fields: query acc.ver, subject acc.ver, % identity, alignment length, mismatches, gap opens, q. start, q. end, s. start, s. end, evalue, bit score
# 2 hits found
mdm_miRNA183	mdm-miR535c	100.000	21	0	0	1	21	1	21	4.38e-06	39.2
mdm_miRNA183	mdm-miR535b	100.000	21	0	0	1	21	1	21	4.38e-06	39.2
# BLASTN 2.10.1+
# Query: mdm_miRNA184
# Database: /home/leclercqj/Apple/mature_MirBase.fadb
# 0 hits found
# BLASTN 2.10.1+
# Query: mdm_miRNA185
# Database: /home/leclercqj/Apple/mature_MirBase.fadb
# 0 hits found
# BLASTN 2.10.1+
# Query: mdm_miRNA186
# Database: /home/leclercqj/Apple/mature_MirBase.fadb
# Fields: query acc.ver, subject acc.ver, % identity, alignment length, mismatches, gap opens, q. start, q. end, s. start, s. end, evalue, bit score
# 1 hits found
mdm_miRNA186	mdm-miR11014	100.000	21	0	0	1	21	1	21	4.38e-06	39.2
# BLASTN 2.10.1+
# Query: mdm_miRNA187
# Database: /home/leclercqj/Apple/mature_MirBase.fadb
# 0 hits found
# BLASTN 2.10.1+
# Query: mdm_miRNA188
# Database: /home/leclercqj/Apple/mature_MirBase.fadb
# 0 hits found
# BLASTN 2.10.1+
# Query: mdm_miRNA189
# Database: /home/leclercqj/Apple/mature_MirBase.fadb
# Fields: query acc.ver, subject acc.ver, % identity, alignment length, mismatches, gap opens, q. start, q. end, s. start, s. end, evalue, bit score
# 3 hits found
mdm_miRNA189	mdm-miR408d	100.000	21	0	0	1	21	1	21	4.38e-06	39.2
mdm_miRNA189	mdm-miR408c	100.000	21	0	0	1	21	1	21	4.38e-06	39.2
mdm_miRNA189	mdm-miR408b	100.000	21	0	0	1	21	1	21	4.38e-06	39.2
# BLASTN 2.10.1+
# Query: mdm_miRNA190
# Database: /home/leclercqj/Apple/mature_MirBase.fadb
# Fields: query acc.ver, subject acc.ver, % identity, alignment length, mismatches, gap opens, q. start, q. end, s. start, s. end, evalue, bit score
# 50 hits found
mdm_miRNA190	aof-miR167c	100.000	21	0	0	1	21	1	21	4.38e-06	39.2
mdm_miRNA190	aof-miR167b	100.000	21	0	0	1	21	1	21	4.38e-06	39.2
mdm_miRNA190	pab-miR167b	100.000	21	0	0	1	21	1	21	4.38e-06	39.2
mdm_miRNA190	eun-miR167b-5p	100.000	21	0	0	1	21	1	21	4.38e-06	39.2
mdm_miRNA190	eun-miR167a-5p	100.000	21	0	0	1	21	1	21	4.38e-06	39.2
mdm_miRNA190	vca-miR167b-5p	100.000	21	0	0	1	21	1	21	4.38e-06	39.2
mdm_miRNA190	vca-miR167a-5p	100.000	21	0	0	1	21	1	21	4.38e-06	39.2
mdm_miRNA190	ata-miR167d-5p	100.000	21	0	0	1	21	1	21	4.38e-06	39.2
mdm_miRNA190	ata-miR167f-5p	100.000	21	0	0	1	21	1	21	4.38e-06	39.2
mdm_miRNA190	ata-miR167b-5p	100.000	21	0	0	1	21	1	21	4.38e-06	39.2
mdm_miRNA190	tae-miR167c-5p	100.000	21	0	0	1	21	1	21	4.38e-06	39.2
mdm_miRNA190	bdi-miR167g	100.000	21	0	0	1	21	1	21	4.38e-06	39.2
mdm_miRNA190	atr-miR167	100.000	21	0	0	1	21	1	21	4.38e-06	39.2
mdm_miRNA190	cpa-miR167d	100.000	21	0	0	1	21	1	21	4.38e-06	39.2
mdm_miRNA190	ppe-miR167c	100.000	21	0	0	1	21	1	21	4.38e-06	39.2
mdm_miRNA190	bdi-miR167e-5p	100.000	21	0	0	1	21	1	21	4.38e-06	39.2
mdm_miRNA190	mes-miR167f	100.000	21	0	0	1	21	1	21	4.38e-06	39.2
mdm_miRNA190	mes-miR167e	100.000	21	0	0	1	21	1	21	4.38e-06	39.2
mdm_miRNA190	mes-miR167d	100.000	21	0	0	1	21	1	21	4.38e-06	39.2
mdm_miRNA190	cme-miR167f	100.000	21	0	0	1	21	1	21	4.38e-06	39.2
[truncated: 1,756 more rows]

## Sheet: Blast PNRD
# BLASTN 2.10.1+
# Query: mdm_miRNA1
# Database: /home/leclercqj/Apple/all_mature_PNRD.fadb
# Fields: query acc.ver, subject acc.ver, % identity, alignment length, mismatches, gap opens, q. start, q. end, s. start, s. end, evalue, bit score
# 50 hits found
mdm_miRNA1	zma-miR166t	100.000	21	0	0	1	21	1	21	1.23e-06	39.2
mdm_miRNA1	zma-miR166s	100.000	21	0	0	1	21	1	21	1.23e-06	39.2
mdm_miRNA1	zma-miR166r	100.000	21	0	0	1	21	1	21	1.23e-06	39.2
mdm_miRNA1	zma-miR166q	100.000	21	0	0	1	21	1	21	1.23e-06	39.2
mdm_miRNA1	zma-miR166p	100.000	21	0	0	1	21	1	21	1.23e-06	39.2
mdm_miRNA1	zma-miR166o	100.000	21	0	0	1	21	1	21	1.23e-06	39.2
mdm_miRNA1	zma-miR166n	100.000	21	0	0	1	21	1	21	1.23e-06	39.2
mdm_miRNA1	zma-miR166a	100.000	21	0	0	1	21	1	21	1.23e-06	39.2
mdm_miRNA1	vvi-miR166h	100.000	21	0	0	1	21	1	21	1.23e-06	39.2
mdm_miRNA1	vvi-miR166g	100.000	21	0	0	1	21	1	21	1.23e-06	39.2
mdm_miRNA1	vvi-miR166f	100.000	21	0	0	1	21	1	21	1.23e-06	39.2
mdm_miRNA1	vvi-miR166e	100.000	21	0	0	1	21	1	21	1.23e-06	39.2
mdm_miRNA1	vvi-miR166d	100.000	21	0	0	1	21	1	21	1.23e-06	39.2
mdm_miRNA1	vvi-miR166c	100.000	21	0	0	1	21	1	21	1.23e-06	39.2
mdm_miRNA1	vun-miR166d.3	100.000	21	0	0	1	21	1	21	1.23e-06	39.2
mdm_miRNA1	vun-miR166d.2	100.000	21	0	0	1	21	1	21	1.23e-06	39.2
mdm_miRNA1	vun-miR166d.1	100.000	21	0	0	1	21	1	21	1.23e-06	39.2
mdm_miRNA1	vun-miR166b.1	100.000	21	0	0	1	21	1	21	1.23e-06	39.2
mdm_miRNA1	tcc-miR166d	100.000	21	0	0	1	21	1	21	1.23e-06	39.2
mdm_miRNA1	tcc-miR166a	100.000	21	0	0	1	21	1	21	1.23e-06	39.2
mdm_miRNA1	sof-miR166	100.000	21	0	0	1	21	1	21	1.23e-06	39.2
mdm_miRNA1	smo-miR166c	100.000	21	0	0	1	21	1	21	1.23e-06	39.2
mdm_miRNA1	smo-miR166b	100.000	21	0	0	1	21	1	21	1.23e-06	39.2
mdm_miRNA1	smo-miR166a	100.000	21	0	0	1	21	1	21	1.23e-06	39.2
mdm_miRNA1	sly-miR166b	100.000	21	0	0	1	21	1	21	1.23e-06	39.2
mdm_miRNA1	sly-miR166a	100.000	21	0	0	1	21	1	21	1.23e-06	39.2
mdm_miRNA1	sit-miR60-npr	100.000	21	0	0	1	21	1	21	1.23e-06	39.2
mdm_miRNA1	sit-miR59-npr	100.000	21	0	0	1	21	1	21	1.23e-06	39.2
mdm_miRNA1	sit-miR58-3-npr	100.000	21	0	0	1	21	1	21	1.23e-06	39.2
mdm_miRNA1	sit-miR58-2-npr	100.000	21	0	0	1	21	1	21	1.23e-06	39.2
mdm_miRNA1	sit-miR58-1-npr	100.000	21	0	0	1	21	1	21	1.23e-06	39.2
mdm_miRNA1	sit-miR21-2-npr	100.000	21	0	0	1	21	2	22	1.23e-06	39.2
mdm_miRNA1	sit-miR21-1-npr	100.000	21	0	0	1	21	2	22	1.23e-06	39.2
mdm_miRNA1	sit-miR166a-5	100.000	21	0	0	1	21	1	21	1.23e-06	39.2
mdm_miRNA1	sit-miR166a-4	100.000	21	0	0	1	21	1	21	1.23e-06	39.2
mdm_miRNA1	sit-miR166a-3	100.000	21	0	0	1	21	1	21	1.23e-06	39.2
mdm_miRNA1	sit-miR166a-2	100.000	21	0	0	1	21	1	21	1.23e-06	39.2
mdm_miRNA1	sit-miR166a-1	100.000	21	0	0	1	21	1	21	1.23e-06	39.2
mdm_miRNA1	rco-miR166e	100.000	21	0	0	1	21	1	21	1.23e-06	39.2
mdm_miRNA1	rco-miR166d	100.000	21	0	0	1	21	1	21	1.23e-06	39.2
mdm_miRNA1	rco-miR166c	100.000	21	0	0	1	21	1	21	1.23e-06	39.2
mdm_miRNA1	rco-miR166b	100.000	21	0	0	1	21	1	21	1.23e-06	39.2
mdm_miRNA1	rco-miR166a	100.000	21	0	0	1	21	1	21	1.23e-06	39.2
mdm_miRNA1	pvu-miR166	100.000	21	0	0	1	21	1	21	1.23e-06	39.2
mdm_miRNA1	ptc-miR166m	100.000	21	0	0	1	21	1	21	1.23e-06	39.2
mdm_miRNA1	ptc-miR166l	100.000	21	0	0	1	21	1	21	1.23e-06	39.2
mdm_miRNA1	ptc-miR166k	100.000	21	0	0	1	21	1	21	1.23e-06	39.2
mdm_miRNA1	ptc-miR166j	100.000	21	0	0	1	21	1	21	1.23e-06	39.2
mdm_miRNA1	ptc-miR166i	100.000	21	0	0	1	21	1	21	1.23e-06	39.2
mdm_miRNA1	ptc-miR166h	100.000	21	0	0	1	21	1	21	1.23e-06	39.2
# BLASTN 2.10.1+
# Query: mdm_miRNA2
# Database: /home/leclercqj/Apple/all_mature_PNRD.fadb
# Fields: query acc.ver, subject acc.ver, % identity, alignment length, mismatches, gap opens, q. start, q. end, s. start, s. end, evalue, bit score
# 45 hits found
mdm_miRNA2	vvi-miR159c	100.000	21	0	0	1	21	1	21	1.23e-06	39.2
mdm_miRNA2	vun-miR159a	100.000	21	0	0	1	21	1	21	1.23e-06	39.2
mdm_miRNA2	sly-miR159	100.000	21	0	0	1	21	1	21	1.23e-06	39.2
mdm_miRNA2	rco-miR159	100.000	21	0	0	1	21	1	21	1.23e-06	39.2
mdm_miRNA2	pvu-miR159	100.000	21	0	0	1	21	1	21	1.23e-06	39.2
mdm_miRNA2	ptc-miR159c	100.000	21	0	0	1	21	1	21	1.23e-06	39.2
mdm_miRNA2	ptc-miR159b	100.000	21	0	0	1	21	1	21	1.23e-06	39.2
mdm_miRNA2	ptc-miR159a	100.000	21	0	0	1	21	1	21	1.23e-06	39.2
mdm_miRNA2	mtr-miR159c	100.000	21	0	0	1	21	1	21	1.23e-06	39.2
mdm_miRNA2	mtr-miR159a	100.000	21	0	0	1	21	1	21	1.23e-06	39.2
mdm_miRNA2	ltu-miR159	100.000	21	0	0	1	21	1	21	1.23e-06	39.2
mdm_miRNA2	gma-miR159a	100.000	21	0	0	1	21	1	21	1.23e-06	39.2
mdm_miRNA2	csi-miR159	100.000	21	0	0	1	21	1	21	1.23e-06	39.2
mdm_miRNA2	bra-miR159a	100.000	21	0	0	1	21	1	21	1.23e-06	39.2
mdm_miRNA2	bna-miR159	100.000	21	0	0	1	21	1	21	1.23e-06	39.2
mdm_miRNA2	ath-miR159a	100.000	21	0	0	1	21	1	21	1.23e-06	39.2
mdm_miRNA2	aly-miR159a	100.000	21	0	0	1	21	1	21	1.23e-06	39.2
mdm_miRNA2	ahy-miR159	100.000	21	0	0	1	21	1	21	1.23e-06	39.2
mdm_miRNA2	zma-miR159m	100.000	20	0	0	1	20	1	20	4.29e-06	37.4
mdm_miRNA2	zma-miR159k	100.000	20	0	0	1	20	1	20	4.29e-06	37.4
mdm_miRNA2	zma-miR159j	100.000	20	0	0	1	20	1	20	4.29e-06	37.4
mdm_miRNA2	zma-miR159b	100.000	20	0	0	1	20	1	20	4.29e-06	37.4
mdm_miRNA2	zma-miR159a	100.000	20	0	0	1	20	1	20	4.29e-06	37.4
mdm_miRNA2	tae-miR159b	100.000	20	0	0	1	20	1	20	4.29e-06	37.4
mdm_miRNA2	tae-miR159a	100.000	20	0	0	1	20	1	20	4.29e-06	37.4
mdm_miRNA2	ssp-miR159a	100.000	20	0	0	1	20	1	20	4.29e-06	37.4
mdm_miRNA2	spr-miR159	100.000	20	0	0	1	20	1	20	4.29e-06	37.4
mdm_miRNA2	sof-miR159d	100.000	20	0	0	1	20	1	20	4.29e-06	37.4
mdm_miRNA2	sof-miR159b	100.000	20	0	0	1	20	1	20	4.29e-06	37.4
mdm_miRNA2	sof-miR159a	100.000	20	0	0	1	20	1	20	4.29e-06	37.4
mdm_miRNA2	sbi-miR159	100.000	20	0	0	1	20	1	20	4.29e-06	37.4
mdm_miRNA2	sar-miR159	100.000	20	0	0	1	20	1	20	4.29e-06	37.4
mdm_miRNA2	ptc-miRf10271-akr	100.000	20	0	0	2	21	1	20	4.29e-06	37.4
mdm_miRNA2	pgl-miR159	100.000	20	0	0	1	20	1	20	4.29e-06	37.4
mdm_miRNA2	osa-miR159m	100.000	20	0	0	1	20	1	20	4.29e-06	37.4
mdm_miRNA2	osa-miR159f	100.000	20	0	0	2	21	2	21	4.29e-06	37.4
mdm_miRNA2	osa-miR159b	100.000	20	0	0	1	20	1	20	4.29e-06	37.4
mdm_miRNA2	osa-miR159a	100.000	20	0	0	1	20	1	20	4.29e-06	37.4
mdm_miRNA2	oru-miR159	100.000	20	0	0	1	20	1	20	4.29e-06	37.4
mdm_miRNA2	mtr-miR319b	100.000	20	0	0	2	21	1	20	4.29e-06	37.4
mdm_miRNA2	hvu-miR159b	100.000	20	0	0	1	20	1	20	4.29e-06	37.4
mdm_miRNA2	hvu-miR159a	100.000	20	0	0	1	20	1	20	4.29e-06	37.4
mdm_miRNA2	far-miR159	100.000	20	0	0	1	20	1	20	4.29e-06	37.4
mdm_miRNA2	ath-miR159b	100.000	20	0	0	1	20	1	20	4.29e-06	37.4
mdm_miRNA2	aly-miR159b	100.000	20	0	0	1	20	1	20	4.29e-06	37.4
# BLASTN 2.10.1+
# Query: mdm_miRNA3
# Database: /home/leclercqj/Apple/all_mature_PNRD.fadb
# 0 hits found
# BLASTN 2.10.1+
# Query: mdm_miRNA4
# Database: /home/leclercqj/Apple/all_mature_PNRD.fadb
# 0 hits found
# BLASTN 2.10.1+
# Query: mdm_miRNA5
# Database: /home/leclercqj/Apple/all_mature_PNRD.fadb
# Fields: query acc.ver, subject acc.ver, % identity, alignment length, mismatches, gap opens, q. start, q. end, s. start, s. end, evalue, bit score
# 43 hits found
mdm_miRNA5	vvi-miR319f	100.000	21	0	0	1	21	1	21	1.23e-06	39.2
mdm_miRNA5	vvi-miR319c	100.000	21	0	0	1	21	1	21	1.23e-06	39.2
mdm_miRNA5	vvi-miR319b	100.000	21	0	0	1	21	1	21	1.23e-06	39.2
mdm_miRNA5	tar-miR159	100.000	21	0	0	1	21	1	21	1.23e-06	39.2
mdm_miRNA5	svi-miR159	100.000	21	0	0	1	21	1	21	1.23e-06	39.2
mdm_miRNA5	rin-miR159	100.000	21	0	0	1	21	1	21	1.23e-06	39.2
mdm_miRNA5	rco-miR319c	100.000	21	0	0	1	21	1	21	1.23e-06	39.2
mdm_miRNA5	rco-miR319b	100.000	21	0	0	1	21	1	21	1.23e-06	39.2
mdm_miRNA5	rco-miR319a	100.000	21	0	0	1	21	1	21	1.23e-06	39.2
mdm_miRNA5	nof-miR159	100.000	21	0	0	1	21	1	21	1.23e-06	39.2
mdm_miRNA5	mma-miR159	100.000	21	0	0	1	21	1	21	1.23e-06	39.2
mdm_miRNA5	fal-miR159	100.000	21	0	0	1	21	1	21	1.23e-06	39.2
mdm_miRNA5	ech-miR159	100.000	21	0	0	1	21	1	21	1.23e-06	39.2
mdm_miRNA5	dso-miR159	100.000	21	0	0	1	21	1	21	1.23e-06	39.2
mdm_miRNA5	crb-miR159	100.000	21	0	0	1	21	1	21	1.23e-06	39.2
mdm_miRNA5	cor-miR159	100.000	21	0	0	1	21	1	21	1.23e-06	39.2
mdm_miRNA5	cmi-miR159	100.000	21	0	0	1	21	1	21	1.23e-06	39.2
mdm_miRNA5	bvl-miR159	100.000	21	0	0	1	21	1	21	1.23e-06	39.2
mdm_miRNA5	ath-miR319b	100.000	21	0	0	1	21	1	21	1.23e-06	39.2
mdm_miRNA5	ath-miR319a	100.000	21	0	0	1	21	1	21	1.23e-06	39.2
mdm_miRNA5	aqc-miR319	100.000	21	0	0	1	21	1	21	1.23e-06	39.2
mdm_miRNA5	ape-miR159	100.000	21	0	0	1	21	1	21	1.23e-06	39.2
mdm_miRNA5	aly-miR319b	100.000	21	0	0	1	21	1	21	1.23e-06	39.2
mdm_miRNA5	aly-miR319a	100.000	21	0	0	1	21	1	21	1.23e-06	39.2
mdm_miRNA5	ahi-miR159	100.000	21	0	0	1	21	1	21	1.23e-06	39.2
mdm_miRNA5	aha-miR159	100.000	21	0	0	1	21	1	21	1.23e-06	39.2
mdm_miRNA5	acb-miR159	100.000	21	0	0	1	21	1	21	1.23e-06	39.2
mdm_miRNA5	vvi-miR319g	100.000	20	0	0	1	20	1	20	4.29e-06	37.4
mdm_miRNA5	vun-miR319a.2	100.000	20	0	0	1	20	1	20	4.29e-06	37.4
mdm_miRNA5	vun-miR319a.1	100.000	20	0	0	1	20	1	20	4.29e-06	37.4
mdm_miRNA5	tae-miR319a	100.000	20	0	0	1	20	1	20	4.29e-06	37.4
mdm_miRNA5	ptc-miR319d	100.000	20	0	0	1	20	1	20	4.29e-06	37.4
mdm_miRNA5	ptc-miR319c	100.000	20	0	0	1	20	1	20	4.29e-06	37.4
mdm_miRNA5	ptc-miR319b	100.000	20	0	0	1	20	1	20	4.29e-06	37.4
mdm_miRNA5	ptc-miR319a	100.000	20	0	0	1	20	1	20	4.29e-06	37.4
mdm_miRNA5	ppt-miR319e	100.000	20	0	0	1	20	2	21	4.29e-06	37.4
mdm_miRNA5	ppt-miR319d	100.000	20	0	0	1	20	2	21	4.29e-06	37.4
mdm_miRNA5	ppt-miR319c	100.000	20	0	0	1	20	2	21	4.29e-06	37.4
mdm_miRNA5	mtr-miR319	100.000	20	0	0	1	20	1	20	4.29e-06	37.4
mdm_miRNA5	ltu-miR319	100.000	20	0	0	1	20	1	20	4.29e-06	37.4
mdm_miRNA5	gma-miR319b	100.000	20	0	0	1	20	1	20	4.29e-06	37.4
mdm_miRNA5	gma-miR319a	100.000	20	0	0	1	20	1	20	4.29e-06	37.4
mdm_miRNA5	ctr-miR319	100.000	20	0	0	1	20	1	20	4.29e-06	37.4
# BLASTN 2.10.1+
# Query: mdm_miRNA6
# Database: /home/leclercqj/Apple/all_mature_PNRD.fadb
# 0 hits found
# BLASTN 2.10.1+
# Query: mdm_miRNA7
# Database: /home/leclercqj/Apple/all_mature_PNRD.fadb
# Fields: query acc.ver, subject acc.ver, % identity, alignment length, mismatches, gap opens, q. start, q. end, s. start, s. end, evalue, bit score
# 15 hits found
mdm_miRNA7	vvi-miR319e	100.000	20	0	0	1	20	2	21	3.75e-06	37.4
mdm_miRNA7	vun-miR319e.2	100.000	20	0	0	1	20	2	21	3.75e-06	37.4
mdm_miRNA7	vun-miR319e.1	100.000	20	0	0	1	20	2	21	3.75e-06	37.4
mdm_miRNA7	tcc-miR319	100.000	20	0	0	1	20	2	21	3.75e-06	37.4
mdm_miRNA7	rco-miR319d	100.000	20	0	0	1	20	1	20	3.75e-06	37.4
mdm_miRNA7	pvu-miR319c	100.000	20	0	0	1	20	1	20	3.75e-06	37.4
mdm_miRNA7	ptc-miR319h	100.000	20	0	0	1	20	1	20	3.75e-06	37.4
mdm_miRNA7	ptc-miR319g	100.000	20	0	0	1	20	1	20	3.75e-06	37.4
mdm_miRNA7	ptc-miR319f	100.000	20	0	0	1	20	1	20	3.75e-06	37.4
mdm_miRNA7	ptc-miR319e	100.000	20	0	0	1	20	1	20	3.75e-06	37.4
mdm_miRNA7	ppl-miR319	100.000	20	0	0	1	20	1	20	3.75e-06	37.4
mdm_miRNA7	csi-miR319	100.000	20	0	0	1	20	2	21	3.75e-06	37.4
mdm_miRNA7	ath-miR319c	100.000	20	0	0	1	20	1	20	3.75e-06	37.4
mdm_miRNA7	aly-miR319d	100.000	20	0	0	1	20	1	20	3.75e-06	37.4
mdm_miRNA7	aly-miR319c	100.000	20	0	0	1	20	1	20	3.75e-06	37.4
# BLASTN 2.10.1+
# Query: mdm_miRNA8
# Database: /home/leclercqj/Apple/all_mature_PNRD.fadb
# Fields: query acc.ver, subject acc.ver, % identity, alignment length, mismatches, gap opens, q. start, q. end, s. start, s. end, evalue, bit score
# 11 hits found
mdm_miRNA8	zma-miR159g	100.000	20	0	0	1	20	1	20	3.75e-06	37.4
mdm_miRNA8	zma-miR159f	100.000	20	0	0	1	20	1	20	3.75e-06	37.4
mdm_miRNA8	zma-miR159d	100.000	20	0	0	1	20	1	20	3.75e-06	37.4
mdm_miRNA8	zma-miR159c	100.000	20	0	0	1	20	1	20	3.75e-06	37.4
mdm_miRNA8	sof-miR159c	100.000	20	0	0	1	20	1	20	3.75e-06	37.4
mdm_miRNA8	smo-miR159	100.000	20	0	0	1	20	1	20	3.75e-06	37.4
mdm_miRNA8	sit-miR110-npr	100.000	20	0	0	1	20	1	20	3.75e-06	37.4
mdm_miRNA8	sbi-miR159b	100.000	20	0	0	1	20	1	20	3.75e-06	37.4
mdm_miRNA8	ptc-miR159d	100.000	20	0	0	1	20	1	20	3.75e-06	37.4
mdm_miRNA8	pta-miR159c	100.000	20	0	0	1	20	1	20	3.75e-06	37.4
mdm_miRNA8	psi-miR159	100.000	20	0	0	1	20	1	20	3.75e-06	37.4
# BLASTN 2.10.1+
# Query: mdm_miRNA9
# Database: /home/leclercqj/Apple/all_mature_PNRD.fadb
# Fields: query acc.ver, subject acc.ver, % identity, alignment length, mismatches, gap opens, q. start, q. end, s. start, s. end, evalue, bit score
# 43 hits found
mdm_miRNA9	vvi-miR319g	100.000	20	0	0	1	20	1	20	3.75e-06	37.4
mdm_miRNA9	vvi-miR319f	100.000	20	0	0	1	20	1	20	3.75e-06	37.4
mdm_miRNA9	vvi-miR319c	100.000	20	0	0	1	20	1	20	3.75e-06	37.4
mdm_miRNA9	vvi-miR319b	100.000	20	0	0	1	20	1	20	3.75e-06	37.4
mdm_miRNA9	vun-miR319a.2	100.000	20	0	0	1	20	1	20	3.75e-06	37.4
mdm_miRNA9	vun-miR319a.1	100.000	20	0	0	1	20	1	20	3.75e-06	37.4
mdm_miRNA9	tar-miR159	100.000	20	0	0	1	20	1	20	3.75e-06	37.4
mdm_miRNA9	tae-miR319a	100.000	20	0	0	1	20	1	20	3.75e-06	37.4
mdm_miRNA9	svi-miR159	100.000	20	0	0	1	20	1	20	3.75e-06	37.4
mdm_miRNA9	rin-miR159	100.000	20	0	0	1	20	1	20	3.75e-06	37.4
mdm_miRNA9	rco-miR319c	100.000	20	0	0	1	20	1	20	3.75e-06	37.4
mdm_miRNA9	rco-miR319b	100.000	20	0	0	1	20	1	20	3.75e-06	37.4
mdm_miRNA9	rco-miR319a	100.000	20	0	0	1	20	1	20	3.75e-06	37.4
mdm_miRNA9	ptc-miR319d	100.000	20	0	0	1	20	1	20	3.75e-06	37.4
mdm_miRNA9	ptc-miR319c	100.000	20	0	0	1	20	1	20	3.75e-06	37.4
mdm_miRNA9	ptc-miR319b	100.000	20	0	0	1	20	1	20	3.75e-06	37.4
mdm_miRNA9	ptc-miR319a	100.000	20	0	0	1	20	1	20	3.75e-06	37.4
mdm_miRNA9	ppt-miR319e	100.000	20	0	0	1	20	2	21	3.75e-06	37.4
mdm_miRNA9	ppt-miR319d	100.000	20	0	0	1	20	2	21	3.75e-06	37.4
mdm_miRNA9	ppt-miR319c	100.000	20	0	0	1	20	2	21	3.75e-06	37.4
mdm_miRNA9	nof-miR159	100.000	20	0	0	1	20	1	20	3.75e-06	37.4
mdm_miRNA9	mtr-miR319	100.000	20	0	0	1	20	1	20	3.75e-06	37.4
mdm_miRNA9	mma-miR159	100.000	20	0	0	1	20	1	20	3.75e-06	37.4
mdm_miRNA9	ltu-miR319	100.000	20	0	0	1	20	1	20	3.75e-06	37.4
mdm_miRNA9	gma-miR319b	100.000	20	0	0	1	20	1	20	3.75e-06	37.4
mdm_miRNA9	gma-miR319a	100.000	20	0	0	1	20	1	20	3.75e-06	37.4
mdm_miRNA9	fal-miR159	100.000	20	0	0	1	20	1	20	3.75e-06	37.4
mdm_miRNA9	ech-miR159	100.000	20	0	0	1	20	1	20	3.75e-06	37.4
mdm_miRNA9	dso-miR159	100.000	20	0	0	1	20	1	20	3.75e-06	37.4
mdm_miRNA9	ctr-miR319	100.000	20	0	0	1	20	1	20	3.75e-06	37.4
mdm_miRNA9	crb-miR159	100.000	20	0	0	1	20	1	20	3.75e-06	37.4
mdm_miRNA9	cor-miR159	100.000	20	0	0	1	20	1	20	3.75e-06	37.4
mdm_miRNA9	cmi-miR159	100.000	20	0	0	1	20	1	20	3.75e-06	37.4
mdm_miRNA9	bvl-miR159	100.000	20	0	0	1	20	1	20	3.75e-06	37.4
mdm_miRNA9	ath-miR319b	100.000	20	0	0	1	20	1	20	3.75e-06	37.4
mdm_miRNA9	ath-miR319a	100.000	20	0	0	1	20	1	20	3.75e-06	37.4
mdm_miRNA9	aqc-miR319	100.000	20	0	0	1	20	1	20	3.75e-06	37.4
mdm_miRNA9	ape-miR159	100.000	20	0	0	1	20	1	20	3.75e-06	37.4
mdm_miRNA9	aly-miR319b	100.000	20	0	0	1	20	1	20	3.75e-06	37.4
mdm_miRNA9	aly-miR319a	100.000	20	0	0	1	20	1	20	3.75e-06	37.4
mdm_miRNA9	ahi-miR159	100.000	20	0	0	1	20	1	20	3.75e-06	37.4
mdm_miRNA9	aha-miR159	100.000	20	0	0	1	20	1	20	3.75e-06	37.4
mdm_miRNA9	acb-miR159	100.000	20	0	0	1	20	1	20	3.75e-06	37.4
# BLASTN 2.10.1+
# Query: mdm_miRNA10
# Database: /home/leclercqj/Apple/all_mature_PNRD.fadb
# 0 hits found
# BLASTN 2.10.1+
# Query: mdm_miRNA11
# Database: /home/leclercqj/Apple/all_mature_PNRD.fadb
# Fields: query acc.ver, subject acc.ver, % identity, alignment length, mismatches, gap opens, q. start, q. end, s. start, s. end, evalue, bit score
# 50 hits found
mdm_miRNA11	zma-miR396g	100.000	21	0	0	1	21	1	21	1.23e-06	39.2
mdm_miRNA11	zma-miR396f	100.000	21	0	0	1	21	1	21	1.23e-06	39.2
mdm_miRNA11	tcc-miR396e	100.000	21	0	0	1	21	1	21	1.23e-06	39.2
mdm_miRNA11	tcc-miR396c	100.000	21	0	0	1	21	1	21	1.23e-06	39.2
mdm_miRNA11	sbi-miR396c	100.000	21	0	0	1	21	1	21	1.23e-06	39.2
mdm_miRNA11	rco-miR396	100.000	21	0	0	1	21	1	21	1.23e-06	39.2
mdm_miRNA11	ptc-miR396e	100.000	21	0	0	1	21	1	21	1.23e-06	39.2
mdm_miRNA11	ptc-miR396d	100.000	21	0	0	1	21	1	21	1.23e-06	39.2
mdm_miRNA11	ptc-miR396c	100.000	21	0	0	1	21	1	21	1.23e-06	39.2
mdm_miRNA11	pta-miR396	100.000	21	0	0	1	21	1	21	1.23e-06	39.2
mdm_miRNA11	osa-miR396c	100.000	21	0	0	1	21	1	21	1.23e-06	39.2
mdm_miRNA11	mtr-miR396a	100.000	21	0	0	1	21	1	21	1.23e-06	39.2
mdm_miRNA11	gma-miR396c	100.000	21	0	0	1	21	1	21	1.23e-06	39.2
mdm_miRNA11	gma-miR396b	100.000	21	0	0	1	21	1	21	1.23e-06	39.2
mdm_miRNA11	ccl-miR396	100.000	21	0	0	1	21	1	21	1.23e-06	39.2
mdm_miRNA11	bna-miR396a	100.000	21	0	0	1	21	1	21	1.23e-06	39.2
mdm_miRNA11	bdi-miR396e	100.000	21	0	0	1	21	1	21	1.23e-06	39.2
mdm_miRNA11	ath-miR396b	100.000	21	0	0	1	21	1	21	1.23e-06	39.2
mdm_miRNA11	aqc-miR396b	100.000	21	0	0	1	21	1	21	1.23e-06	39.2
mdm_miRNA11	aly-miR396b	100.000	21	0	0	1	21	1	21	1.23e-06	39.2
mdm_miRNA11	zma-miR396l	100.000	20	0	0	1	20	1	20	4.29e-06	37.4
mdm_miRNA11	zma-miR396k	100.000	20	0	0	1	20	1	20	4.29e-06	37.4
mdm_miRNA11	zma-miR396j	100.000	20	0	0	1	20	1	20	4.29e-06	37.4
mdm_miRNA11	zma-miR396i	100.000	20	0	0	1	20	1	20	4.29e-06	37.4
mdm_miRNA11	zma-miR396h	100.000	20	0	0	1	20	1	20	4.29e-06	37.4
mdm_miRNA11	zma-miR396c	100.000	20	0	0	1	20	1	20	4.29e-06	37.4
mdm_miRNA11	zma-miR396b	100.000	20	0	0	1	20	1	20	4.29e-06	37.4
mdm_miRNA11	zma-miR396a	100.000	20	0	0	1	20	1	20	4.29e-06	37.4
mdm_miRNA11	vvi-miR396d	100.000	20	0	0	1	20	1	20	4.29e-06	37.4
mdm_miRNA11	vvi-miR396c	100.000	20	0	0	1	20	1	20	4.29e-06	37.4
mdm_miRNA11	vvi-miR396b	100.000	20	0	0	1	20	1	20	4.29e-06	37.4
mdm_miRNA11	vvi-miR396a	100.000	20	0	0	1	20	1	20	4.29e-06	37.4
mdm_miRNA11	vun-miR396a	100.000	20	0	0	1	20	1	20	4.29e-06	37.4
mdm_miRNA11	tcc-miR396b	100.000	20	0	0	1	20	1	20	4.29e-06	37.4
mdm_miRNA11	tcc-miR396a	100.000	20	0	0	1	20	1	20	4.29e-06	37.4
mdm_miRNA11	ssp-miR396	100.000	20	0	0	1	20	1	20	4.29e-06	37.4
mdm_miRNA11	sof-miR396	100.000	20	0	0	1	20	1	20	4.29e-06	37.4
mdm_miRNA11	sbi-miR396b	100.000	20	0	0	1	20	1	20	4.29e-06	37.4
mdm_miRNA11	sbi-miR396a	100.000	20	0	0	1	20	1	20	4.29e-06	37.4
mdm_miRNA11	ptc-miRf10482-akr	100.000	20	0	0	1	20	20	1	4.29e-06	37.4
mdm_miRNA11	ptc-miRf10258-akr	100.000	20	0	0	1	20	20	1	4.29e-06	37.4
mdm_miRNA11	ptc-miR396b	100.000	20	0	0	1	20	1	20	4.29e-06	37.4
mdm_miRNA11	ptc-miR396a	100.000	20	0	0	1	20	1	20	4.29e-06	37.4
mdm_miRNA11	pab-miR396a	100.000	20	0	0	1	20	1	20	4.29e-06	37.4
mdm_miRNA11	osa-miR396b	100.000	20	0	0	1	20	1	20	4.29e-06	37.4
mdm_miRNA11	osa-miR396a	100.000	20	0	0	1	20	1	20	4.29e-06	37.4
mdm_miRNA11	mtr-miR396b	100.000	20	0	0	1	20	1	20	4.29e-06	37.4
mdm_miRNA11	lja-miR396	100.000	20	0	0	1	20	1	20	4.29e-06	37.4
mdm_miRNA11	gma-miR396e	100.000	20	0	0	1	20	1	20	4.29e-06	37.4
mdm_miRNA11	gma-miR396a	100.000	20	0	0	1	20	1	20	4.29e-06	37.4
# BLASTN 2.10.1+
# Query: mdm_miRNA12
# Database: /home/leclercqj/Apple/all_mature_PNRD.fadb
# Fields: query acc.ver, subject acc.ver, % identity, alignment length, mismatches, gap opens, q. start, q. end, s. start, s. end, evalue, bit score
# 3 hits found
mdm_miRNA12	sit-miR14-npr	100.000	21	0	0	1	21	1	21	1.23e-06	39.2
mdm_miRNA12	ctr-miR171	100.000	21	0	0	1	21	1	21	1.23e-06	39.2
mdm_miRNA12	vun-miR171.2	100.000	20	0	0	1	20	1	20	4.29e-06	37.4
# BLASTN 2.10.1+
# Query: mdm_miRNA14
# Database: /home/leclercqj/Apple/all_mature_PNRD.fadb
# 0 hits found
# BLASTN 2.10.1+
# Query: mdm_miRNA15
# Database: /home/leclercqj/Apple/all_mature_PNRD.fadb
# 0 hits found
# BLASTN 2.10.1+
# Query: mdm_miRNA16
# Database: /home/leclercqj/Apple/all_mature_PNRD.fadb
# 0 hits found
# BLASTN 2.10.1+
# Query: mdm_miRNA13
# Database: /home/leclercqj/Apple/all_mature_PNRD.fadb
# Fields: query acc.ver, subject acc.ver, % identity, alignment length, mismatches, gap opens, q. start, q. end, s. start, s. end, evalue, bit score
# 50 hits found
mdm_miRNA13	zma-miR166t	100.000	20	0	0	1	20	2	21	3.75e-06	37.4
mdm_miRNA13	zma-miR166s	100.000	20	0	0	1	20	2	21	3.75e-06	37.4
mdm_miRNA13	zma-miR166r	100.000	20	0	0	1	20	2	21	3.75e-06	37.4
mdm_miRNA13	zma-miR166q	100.000	20	0	0	1	20	2	21	3.75e-06	37.4
mdm_miRNA13	zma-miR166p	100.000	20	0	0	1	20	2	21	3.75e-06	37.4
mdm_miRNA13	zma-miR166o	100.000	20	0	0	1	20	2	21	3.75e-06	37.4
mdm_miRNA13	zma-miR166n	100.000	20	0	0	1	20	2	21	3.75e-06	37.4
mdm_miRNA13	zma-miR166a	100.000	20	0	0	1	20	2	21	3.75e-06	37.4
mdm_miRNA13	vvi-miR166h	100.000	20	0	0	1	20	2	21	3.75e-06	37.4
mdm_miRNA13	vvi-miR166g	100.000	20	0	0	1	20	2	21	3.75e-06	37.4
mdm_miRNA13	vvi-miR166f	100.000	20	0	0	1	20	2	21	3.75e-06	37.4
mdm_miRNA13	vvi-miR166e	100.000	20	0	0	1	20	2	21	3.75e-06	37.4
mdm_miRNA13	vvi-miR166d	100.000	20	0	0	1	20	2	21	3.75e-06	37.4
mdm_miRNA13	vvi-miR166c	100.000	20	0	0	1	20	2	21	3.75e-06	37.4
mdm_miRNA13	vun-miR166d.3	100.000	20	0	0	1	20	2	21	3.75e-06	37.4
mdm_miRNA13	vun-miR166d.2	100.000	20	0	0	1	20	2	21	3.75e-06	37.4
mdm_miRNA13	vun-miR166d.1	100.000	20	0	0	1	20	2	21	3.75e-06	37.4
mdm_miRNA13	vun-miR166b.1	100.000	20	0	0	1	20	2	21	3.75e-06	37.4
mdm_miRNA13	tcc-miR166d	100.000	20	0	0	1	20	2	21	3.75e-06	37.4
mdm_miRNA13	tcc-miR166a	100.000	20	0	0	1	20	2	21	3.75e-06	37.4
mdm_miRNA13	sof-miR166	100.000	20	0	0	1	20	2	21	3.75e-06	37.4
mdm_miRNA13	smo-miR166c	100.000	20	0	0	1	20	2	21	3.75e-06	37.4
mdm_miRNA13	smo-miR166b	100.000	20	0	0	1	20	2	21	3.75e-06	37.4
mdm_miRNA13	smo-miR166a	100.000	20	0	0	1	20	2	21	3.75e-06	37.4
mdm_miRNA13	sly-miR166b	100.000	20	0	0	1	20	2	21	3.75e-06	37.4
mdm_miRNA13	sly-miR166a	100.000	20	0	0	1	20	2	21	3.75e-06	37.4
mdm_miRNA13	sit-miR60-npr	100.000	20	0	0	1	20	2	21	3.75e-06	37.4
mdm_miRNA13	sit-miR59-npr	100.000	20	0	0	1	20	2	21	3.75e-06	37.4
mdm_miRNA13	sit-miR58-3-npr	100.000	20	0	0	1	20	2	21	3.75e-06	37.4
mdm_miRNA13	sit-miR58-2-npr	100.000	20	0	0	1	20	2	21	3.75e-06	37.4
mdm_miRNA13	sit-miR58-1-npr	100.000	20	0	0	1	20	2	21	3.75e-06	37.4
mdm_miRNA13	sit-miR21-2-npr	100.000	20	0	0	1	20	3	22	3.75e-06	37.4
mdm_miRNA13	sit-miR21-1-npr	100.000	20	0	0	1	20	3	22	3.75e-06	37.4
mdm_miRNA13	sit-miR166a-5	100.000	20	0	0	1	20	2	21	3.75e-06	37.4
mdm_miRNA13	sit-miR166a-4	100.000	20	0	0	1	20	2	21	3.75e-06	37.4
mdm_miRNA13	sit-miR166a-3	100.000	20	0	0	1	20	2	21	3.75e-06	37.4
mdm_miRNA13	sit-miR166a-2	100.000	20	0	0	1	20	2	21	3.75e-06	37.4
mdm_miRNA13	sit-miR166a-1	100.000	20	0	0	1	20	2	21	3.75e-06	37.4
mdm_miRNA13	rco-miR166e	100.000	20	0	0	1	20	2	21	3.75e-06	37.4
mdm_miRNA13	rco-miR166d	100.000	20	0	0	1	20	2	21	3.75e-06	37.4
mdm_miRNA13	rco-miR166c	100.000	20	0	0	1	20	2	21	3.75e-06	37.4
mdm_miRNA13	rco-miR166b	100.000	20	0	0	1	20	2	21	3.75e-06	37.4
mdm_miRNA13	rco-miR166a	100.000	20	0	0	1	20	2	21	3.75e-06	37.4
mdm_miRNA13	pvu-miR166	100.000	20	0	0	1	20	2	21	3.75e-06	37.4
mdm_miRNA13	ptc-miRf10192-akr	100.000	20	0	0	1	20	1	20	3.75e-06	37.4
mdm_miRNA13	ptc-miR166m	100.000	20	0	0	1	20	2	21	3.75e-06	37.4
mdm_miRNA13	ptc-miR166l	100.000	20	0	0	1	20	2	21	3.75e-06	37.4
mdm_miRNA13	ptc-miR166k	100.000	20	0	0	1	20	2	21	3.75e-06	37.4
mdm_miRNA13	ptc-miR166j	100.000	20	0	0	1	20	2	21	3.75e-06	37.4
mdm_miRNA13	ptc-miR166i	100.000	20	0	0	1	20	2	21	3.75e-06	37.4
# BLASTN 2.10.1+
# Query: mdm_miRNA17
# Database: /home/leclercqj/Apple/all_mature_PNRD.fadb
# Fields: query acc.ver, subject acc.ver, % identity, alignment length, mismatches, gap opens, q. start, q. end, s. start, s. end, evalue, bit score
# 50 hits found
mdm_miRNA17	zma-miR166t	100.000	20	0	0	1	20	1	20	3.75e-06	37.4
mdm_miRNA17	zma-miR166s	100.000	20	0	0	1	20	1	20	3.75e-06	37.4
mdm_miRNA17	zma-miR166r	100.000	20	0	0	1	20	1	20	3.75e-06	37.4
mdm_miRNA17	zma-miR166q	100.000	20	0	0	1	20	1	20	3.75e-06	37.4
mdm_miRNA17	zma-miR166p	100.000	20	0	0	1	20	1	20	3.75e-06	37.4
mdm_miRNA17	zma-miR166o	100.000	20	0	0	1	20	1	20	3.75e-06	37.4
mdm_miRNA17	zma-miR166n	100.000	20	0	0	1	20	1	20	3.75e-06	37.4
mdm_miRNA17	zma-miR166i	100.000	20	0	0	1	20	1	20	3.75e-06	37.4
mdm_miRNA17	zma-miR166h	100.000	20	0	0	1	20	1	20	3.75e-06	37.4
mdm_miRNA17	zma-miR166g	100.000	20	0	0	1	20	1	20	3.75e-06	37.4
mdm_miRNA17	zma-miR166f	100.000	20	0	0	1	20	1	20	3.75e-06	37.4
mdm_miRNA17	zma-miR166e	100.000	20	0	0	1	20	1	20	3.75e-06	37.4
mdm_miRNA17	zma-miR166d	100.000	20	0	0	1	20	1	20	3.75e-06	37.4
mdm_miRNA17	zma-miR166c	100.000	20	0	0	1	20	1	20	3.75e-06	37.4
mdm_miRNA17	zma-miR166b	100.000	20	0	0	1	20	1	20	3.75e-06	37.4
mdm_miRNA17	zma-miR166a	100.000	20	0	0	1	20	1	20	3.75e-06	37.4
mdm_miRNA17	vvi-miR166h	100.000	20	0	0	1	20	1	20	3.75e-06	37.4
mdm_miRNA17	vvi-miR166g	100.000	20	0	0	1	20	1	20	3.75e-06	37.4
mdm_miRNA17	vvi-miR166f	100.000	20	0	0	1	20	1	20	3.75e-06	37.4
mdm_miRNA17	vvi-miR166e	100.000	20	0	0	1	20	1	20	3.75e-06	37.4
mdm_miRNA17	vvi-miR166d	100.000	20	0	0	1	20	1	20	3.75e-06	37.4
mdm_miRNA17	vvi-miR166c	100.000	20	0	0	1	20	1	20	3.75e-06	37.4
mdm_miRNA17	vun-miR166d.3	100.000	20	0	0	1	20	1	20	3.75e-06	37.4
mdm_miRNA17	vun-miR166d.2	100.000	20	0	0	1	20	1	20	3.75e-06	37.4
mdm_miRNA17	vun-miR166d.1	100.000	20	0	0	1	20	1	20	3.75e-06	37.4
mdm_miRNA17	vun-miR166b.1	100.000	20	0	0	1	20	1	20	3.75e-06	37.4
mdm_miRNA17	tcc-miR166d	100.000	20	0	0	1	20	1	20	3.75e-06	37.4
mdm_miRNA17	tcc-miR166b	100.000	20	0	0	1	20	1	20	3.75e-06	37.4
mdm_miRNA17	tcc-miR166a	100.000	20	0	0	1	20	1	20	3.75e-06	37.4
mdm_miRNA17	sof-miR166	100.000	20	0	0	1	20	1	20	3.75e-06	37.4
mdm_miRNA17	smo-miR166c	100.000	20	0	0	1	20	1	20	3.75e-06	37.4
mdm_miRNA17	smo-miR166b	100.000	20	0	0	1	20	1	20	3.75e-06	37.4
mdm_miRNA17	smo-miR166a	100.000	20	0	0	1	20	1	20	3.75e-06	37.4
mdm_miRNA17	sly-miR166b	100.000	20	0	0	1	20	1	20	3.75e-06	37.4
mdm_miRNA17	sly-miR166a	100.000	20	0	0	1	20	1	20	3.75e-06	37.4
mdm_miRNA17	sit-miR60-npr	100.000	20	0	0	1	20	1	20	3.75e-06	37.4
mdm_miRNA17	sit-miR59-npr	100.000	20	0	0	1	20	1	20	3.75e-06	37.4
mdm_miRNA17	sit-miR58-3-npr	100.000	20	0	0	1	20	1	20	3.75e-06	37.4
mdm_miRNA17	sit-miR58-2-npr	100.000	20	0	0	1	20	1	20	3.75e-06	37.4
mdm_miRNA17	sit-miR58-1-npr	100.000	20	0	0	1	20	1	20	3.75e-06	37.4
mdm_miRNA17	sit-miR21-2-npr	100.000	20	0	0	1	20	2	21	3.75e-06	37.4
mdm_miRNA17	sit-miR21-1-npr	100.000	20	0	0	1	20	2	21	3.75e-06	37.4
mdm_miRNA17	sit-miR166a-5	100.000	20	0	0	1	20	1	20	3.75e-06	37.4
mdm_miRNA17	sit-miR166a-4	100.000	20	0	0	1	20	1	20	3.75e-06	37.4
mdm_miRNA17	sit-miR166a-3	100.000	20	0	0	1	20	1	20	3.75e-06	37.4
mdm_miRNA17	sit-miR166a-2	100.000	20	0	0	1	20	1	20	3.75e-06	37.4
mdm_miRNA17	sit-miR166a-1	100.000	20	0	0	1	20	1	20	3.75e-06	37.4
mdm_miRNA17	sbi-miR166j	100.000	20	0	0	1	20	1	20	3.75e-06	37.4
mdm_miRNA17	sbi-miR166i	100.000	20	0	0	1	20	1	20	3.75e-06	37.4
mdm_miRNA17	sbi-miR166h	100.000	20	0	0	1	20	1	20	3.75e-06	37.4
# BLASTN 2.10.1+
# Query: mdm_miRNA18
# Database: /home/leclercqj/Apple/all_mature_PNRD.fadb
# Fields: query acc.ver, subject acc.ver, % identity, alignment length, mismatches, gap opens, q. start, q. end, s. start, s. end, evalue, bit score
# 2 hits found
mdm_miRNA18	ath-miR858	100.000	20	0	0	1	20	2	21	4.29e-06	37.4
mdm_miRNA18	aly-miR858	100.000	20	0	0	1	20	2	21	4.29e-06	37.4
# BLASTN 2.10.1+
# Query: mdm_miRNA19
# Database: /home/leclercqj/Apple/all_mature_PNRD.fadb
# 0 hits found
# BLASTN 2.10.1+
# Query: mdm_miRNA20
# Database: /home/leclercqj/Apple/all_mature_PNRD.fadb
# 0 hits found
# BLASTN 2.10.1+
# Query: mdm_miRNA21
# Database: /home/leclercqj/Apple/all_mature_PNRD.fadb
# Fields: query acc.ver, subject acc.ver, % identity, alignment length, mismatches, gap opens, q. start, q. end, s. start, s. end, evalue, bit score
# 1 hits found
mdm_miRNA21	mdo-miR482	100.000	20	0	0	1	20	3	22	3.79e-06	37.4
# BLASTN 2.10.1+
# Query: mdm_miRNA22
# Database: /home/leclercqj/Apple/all_mature_PNRD.fadb
# Fields: query acc.ver, subject acc.ver, % identity, alignment length, mismatches, gap opens, q. start, q. end, s. start, s. end, evalue, bit score
# 25 hits found
mdm_miRNA22	zma-miR394b	100.000	20	0	0	1	20	1	20	3.75e-06	37.4
mdm_miRNA22	zma-miR394a	100.000	20	0	0	1	20	1	20	3.75e-06	37.4
mdm_miRNA22	vvi-miR394c	100.000	20	0	0	1	20	1	20	3.75e-06	37.4
mdm_miRNA22	vvi-miR394b	100.000	20	0	0	1	20	1	20	3.75e-06	37.4
mdm_miRNA22	vvi-miR394a	100.000	20	0	0	1	20	1	20	3.75e-06	37.4
mdm_miRNA22	vun-miR394a.4	100.000	20	0	0	1	20	1	20	3.75e-06	37.4
mdm_miRNA22	vun-miR394a.3	100.000	20	0	0	1	20	2	21	3.75e-06	37.4
mdm_miRNA22	vun-miR394a.2	100.000	20	0	0	1	20	1	20	3.75e-06	37.4
mdm_miRNA22	vun-miR394a.1	100.000	20	0	0	1	20	2	21	3.75e-06	37.4
mdm_miRNA22	tcc-miR394b	100.000	20	0	0	1	20	1	20	3.75e-06	37.4
mdm_miRNA22	tcc-miR394a	100.000	20	0	0	1	20	1	20	3.75e-06	37.4
mdm_miRNA22	sit-miR394	100.000	20	0	0	1	20	1	20	3.75e-06	37.4
mdm_miRNA22	sbi-miR394b	100.000	20	0	0	1	20	1	20	3.75e-06	37.4
mdm_miRNA22	sbi-miR394a	100.000	20	0	0	1	20	1	20	3.75e-06	37.4
mdm_miRNA22	ptc-miR394b-5p	100.000	20	0	0	1	20	1	20	3.75e-06	37.4
mdm_miRNA22	ptc-miR394a-5p	100.000	20	0	0	1	20	1	20	3.75e-06	37.4
mdm_miRNA22	osa-miR394	100.000	20	0	0	1	20	1	20	3.75e-06	37.4
mdm_miRNA22	ghr-miR394	100.000	20	0	0	1	20	1	20	3.75e-06	37.4
mdm_miRNA22	csi-miR394	100.000	20	0	0	1	20	1	20	3.75e-06	37.4
mdm_miRNA22	bdi-miR394	100.000	20	0	0	1	20	1	20	3.75e-06	37.4
mdm_miRNA22	ath-miR394b	100.000	20	0	0	1	20	1	20	3.75e-06	37.4
mdm_miRNA22	ath-miR394a	100.000	20	0	0	1	20	1	20	3.75e-06	37.4
mdm_miRNA22	aly-miR394b	100.000	20	0	0	1	20	1	20	3.75e-06	37.4
mdm_miRNA22	aly-miR394a	100.000	20	0	0	1	20	1	20	3.75e-06	37.4
mdm_miRNA22	ahy-miR394	100.000	20	0	0	1	20	1	20	3.75e-06	37.4
# BLASTN 2.10.1+
# Query: mdm_miRNA23
# Database: /home/leclercqj/Apple/all_mature_PNRD.fadb
# 0 hits found
# BLASTN 2.10.1+
# Query: mdm_miRNA24
# Database: /home/leclercqj/Apple/all_mature_PNRD.fadb
# Fields: query acc.ver, subject acc.ver, % identity, alignment length, mismatches, gap opens, q. start, q. end, s. start, s. end, evalue, bit score
# 50 hits found
mdm_miRNA24	zma-miR167t	100.000	21	0	0	1	21	1	21	1.23e-06	39.2
mdm_miRNA24	zma-miR167s	100.000	21	0	0	1	21	1	21	1.23e-06	39.2
mdm_miRNA24	zma-miR167r	100.000	21	0	0	1	21	1	21	1.23e-06	39.2
mdm_miRNA24	zma-miR167q	100.000	21	0	0	1	21	1	21	1.23e-06	39.2
mdm_miRNA24	zma-miR167p	100.000	21	0	0	1	21	1	21	1.23e-06	39.2
mdm_miRNA24	zma-miR167o	100.000	21	0	0	1	21	1	21	1.23e-06	39.2
mdm_miRNA24	zma-miR167n	100.000	21	0	0	1	21	1	21	1.23e-06	39.2
mdm_miRNA24	zma-miR167d	100.000	21	0	0	1	21	1	21	1.23e-06	39.2
mdm_miRNA24	zma-miR167c	100.000	21	0	0	1	21	1	21	1.23e-06	39.2
mdm_miRNA24	zma-miR167b	100.000	21	0	0	1	21	1	21	1.23e-06	39.2
mdm_miRNA24	zma-miR167a	100.000	21	0	0	1	21	1	21	1.23e-06	39.2
mdm_miRNA24	vvi-miR167e	100.000	21	0	0	1	21	1	21	1.23e-06	39.2
mdm_miRNA24	vvi-miR167d	100.000	21	0	0	1	21	1	21	1.23e-06	39.2
mdm_miRNA24	vvi-miR167b	100.000	21	0	0	1	21	1	21	1.23e-06	39.2
mdm_miRNA24	vun-miR167b	100.000	21	0	0	1	21	1	21	1.23e-06	39.2
mdm_miRNA24	tcc-miR167b	100.000	21	0	0	1	21	1	21	1.23e-06	39.2
mdm_miRNA24	tcc-miR167a	100.000	21	0	0	1	21	1	21	1.23e-06	39.2
mdm_miRNA24	tae-miR167	100.000	21	0	0	1	21	1	21	1.23e-06	39.2
mdm_miRNA24	sly-miR167	100.000	21	0	0	1	21	1	21	1.23e-06	39.2
mdm_miRNA24	sit-miR167a-3	100.000	21	0	0	1	21	1	21	1.23e-06	39.2
mdm_miRNA24	sit-miR167a-2	100.000	21	0	0	1	21	1	21	1.23e-06	39.2
mdm_miRNA24	sit-miR167a-1	100.000	21	0	0	1	21	1	21	1.23e-06	39.2
mdm_miRNA24	sbi-miR167i	100.000	21	0	0	1	21	1	21	1.23e-06	39.2
mdm_miRNA24	sbi-miR167b	100.000	21	0	0	1	21	1	21	1.23e-06	39.2
mdm_miRNA24	sbi-miR167a	100.000	21	0	0	1	21	1	21	1.23e-06	39.2
mdm_miRNA24	rco-miR167b	100.000	21	0	0	1	21	1	21	1.23e-06	39.2
mdm_miRNA24	rco-miR167a	100.000	21	0	0	1	21	1	21	1.23e-06	39.2
mdm_miRNA24	ptc-miR167d	100.000	21	0	0	1	21	1	21	1.23e-06	39.2
mdm_miRNA24	ptc-miR167c	100.000	21	0	0	1	21	1	21	1.23e-06	39.2
mdm_miRNA24	ptc-miR167b	100.000	21	0	0	1	21	1	21	1.23e-06	39.2
mdm_miRNA24	ptc-miR167a	100.000	21	0	0	1	21	1	21	1.23e-06	39.2
mdm_miRNA24	ppl-miR167a	100.000	21	0	0	1	21	1	21	1.23e-06	39.2
mdm_miRNA24	osa-miR167c	100.000	21	0	0	1	21	1	21	1.23e-06	39.2
mdm_miRNA24	osa-miR167b	100.000	21	0	0	1	21	1	21	1.23e-06	39.2
mdm_miRNA24	osa-miR167a	100.000	21	0	0	1	21	1	21	1.23e-06	39.2
mdm_miRNA24	mtr-miR167	100.000	21	0	0	1	21	1	21	1.23e-06	39.2
mdm_miRNA24	gma-miR167d	100.000	21	0	0	1	21	1	21	1.23e-06	39.2
mdm_miRNA24	gma-miR167b	100.000	21	0	0	1	21	1	21	1.23e-06	39.2
mdm_miRNA24	gma-miR167a	100.000	21	0	0	1	21	1	21	1.23e-06	39.2
mdm_miRNA24	bra-miR167d	100.000	21	0	0	1	21	1	21	1.23e-06	39.2
mdm_miRNA24	bra-miR167c	100.000	21	0	0	1	21	1	21	1.23e-06	39.2
mdm_miRNA24	bra-miR167b	100.000	21	0	0	1	21	1	21	1.23e-06	39.2
mdm_miRNA24	bra-miR167a	100.000	21	0	0	1	21	1	21	1.23e-06	39.2
mdm_miRNA24	bna-miR167c	100.000	21	0	0	1	21	1	21	1.23e-06	39.2
mdm_miRNA24	bna-miR167b	100.000	21	0	0	1	21	1	21	1.23e-06	39.2
mdm_miRNA24	bna-miR167a	100.000	21	0	0	1	21	1	21	1.23e-06	39.2
mdm_miRNA24	bdi-miR167b	100.000	21	0	0	1	21	1	21	1.23e-06	39.2
mdm_miRNA24	bdi-miR167a	100.000	21	0	0	1	21	1	21	1.23e-06	39.2
mdm_miRNA24	ath-miR167b	100.000	21	0	0	1	21	1	21	1.23e-06	39.2
mdm_miRNA24	ath-miR167a	100.000	21	0	0	1	21	1	21	1.23e-06	39.2
# BLASTN 2.10.1+
# Query: mdm_miRNA25
# Database: /home/leclercqj/Apple/all_mature_PNRD.fadb
# 0 hits found
# BLASTN 2.10.1+
# Query: mdm_miRNA26
# Database: /home/leclercqj/Apple/all_mature_PNRD.fadb
# Fields: query acc.ver, subject acc.ver, % identity, alignment length, mismatches, gap opens, q. start, q. end, s. start, s. end, evalue, bit score
# 1 hits found
mdm_miRNA26	mtr-miR4414a	100.000	21	0	0	1	21	1	21	1.23e-06	39.2
# BLASTN 2.10.1+
# Query: mdm_miRNA27
# Database: /home/leclercqj/Apple/all_mature_PNRD.fadb
# 0 hits found
# BLASTN 2.10.1+
# Query: mdm_miRNA28
# Database: /home/leclercqj/Apple/all_mature_PNRD.fadb
# 0 hits found
# BLASTN 2.10.1+
# Query: mdm_miRNA29
# Database: /home/leclercqj/Apple/all_mature_PNRD.fadb
# 0 hits found
# BLASTN 2.10.1+
# Query: mdm_miRNA30
# Database: /home/leclercqj/Apple/all_mature_PNRD.fadb
# Fields: query acc.ver, subject acc.ver, % identity, alignment length, mismatches, gap opens, q. start, q. end, s. start, s. end, evalue, bit score
# 4 hits found
mdm_miRNA30	sit-miR05-npr	100.000	21	0	0	1	21	1	21	1.23e-06	39.2
mdm_miRNA30	ptc-miRf10034-akr	100.000	21	0	0	1	21	3	23	1.23e-06	39.2
mdm_miRNA30	sit-miR21-2-npr	100.000	20	0	0	2	21	1	20	4.29e-06	37.4
mdm_miRNA30	sit-miR21-1-npr	100.000	20	0	0	2	21	1	20	4.29e-06	37.4
# BLASTN 2.10.1+
# Query: mdm_miRNA31
# Database: /home/leclercqj/Apple/all_mature_PNRD.fadb
# Fields: query acc.ver, subject acc.ver, % identity, alignment length, mismatches, gap opens, q. start, q. end, s. start, s. end, evalue, bit score
# 1 hits found
mdm_miRNA31	peu-miR2910	100.000	21	0	0	1	21	1	21	1.23e-06	39.2
# BLASTN 2.10.1+
# Query: mdm_miRNA32
# Database: /home/leclercqj/Apple/all_mature_PNRD.fadb
# 0 hits found
# BLASTN 2.10.1+
# Query: mdm_miRNA33
# Database: /home/leclercqj/Apple/all_mature_PNRD.fadb
# 0 hits found
# BLASTN 2.10.1+
# Query: mdm_miRNA34
# Database: /home/leclercqj/Apple/all_mature_PNRD.fadb
# Fields: query acc.ver, subject acc.ver, % identity, alignment length, mismatches, gap opens, q. start, q. end, s. start, s. end, evalue, bit score
# 33 hits found
mdm_miRNA34	zma-miR393	100.000	22	0	0	1	22	1	22	3.11e-07	41.0
mdm_miRNA34	osa-miR393b	100.000	22	0	0	1	22	1	22	3.11e-07	41.0
mdm_miRNA34	ghr-miR393	100.000	22	0	0	1	22	1	22	3.11e-07	41.0
mdm_miRNA34	zma-miR393g	100.000	21	0	0	1	21	1	21	1.09e-06	39.2
mdm_miRNA34	zma-miR393f	100.000	21	0	0	1	21	1	21	1.09e-06	39.2
mdm_miRNA34	zma-miR393c	100.000	21	0	0	1	21	1	21	1.09e-06	39.2
mdm_miRNA34	zma-miR393b	100.000	21	0	0	1	21	1	21	1.09e-06	39.2
mdm_miRNA34	zma-miR393a	100.000	21	0	0	1	21	1	21	1.09e-06	39.2
mdm_miRNA34	vvi-miR393b	100.000	21	0	0	1	21	1	21	1.09e-06	39.2
mdm_miRNA34	vvi-miR393a	100.000	21	0	0	1	21	1	21	1.09e-06	39.2
mdm_miRNA34	vun-miR393b	100.000	21	0	0	1	21	2	22	1.09e-06	39.2
mdm_miRNA34	vun-miR393a.2	100.000	21	0	0	1	21	1	21	1.09e-06	39.2
mdm_miRNA34	vun-miR393a.1	100.000	21	0	0	1	21	1	21	1.09e-06	39.2
mdm_miRNA34	tcc-miR393b	100.000	21	0	0	1	21	1	21	1.09e-06	39.2
mdm_miRNA34	tcc-miR393a	100.000	21	0	0	1	21	1	21	1.09e-06	39.2
mdm_miRNA34	sbi-miR393	100.000	21	0	0	1	21	1	21	1.09e-06	39.2
mdm_miRNA34	rco-miR393	100.000	21	0	0	1	21	1	21	1.09e-06	39.2
mdm_miRNA34	ptc-miR393d	100.000	21	0	0	1	21	1	21	1.09e-06	39.2
mdm_miRNA34	ptc-miR393c	100.000	21	0	0	1	21	1	21	1.09e-06	39.2
mdm_miRNA34	ptc-miR393b	100.000	21	0	0	1	21	1	21	1.09e-06	39.2
mdm_miRNA34	ptc-miR393a	100.000	21	0	0	1	21	1	21	1.09e-06	39.2
mdm_miRNA34	osa-miR393	100.000	21	0	0	1	21	1	21	1.09e-06	39.2
mdm_miRNA34	mtr-miR393b	100.000	21	0	0	1	21	1	21	1.09e-06	39.2
mdm_miRNA34	mtr-miR393	100.000	21	0	0	1	21	1	21	1.09e-06	39.2
mdm_miRNA34	gma-miR393	100.000	21	0	0	1	21	1	21	1.09e-06	39.2
mdm_miRNA34	csi-miR393	100.000	21	0	0	1	21	2	22	1.09e-06	39.2
mdm_miRNA34	bna-miR393	100.000	21	0	0	1	21	1	21	1.09e-06	39.2
mdm_miRNA34	bdi-miR393b	100.000	21	0	0	1	21	1	21	1.09e-06	39.2
mdm_miRNA34	bdi-miR393a	100.000	21	0	0	1	21	1	21	1.09e-06	39.2
mdm_miRNA34	ath-miR393b	100.000	21	0	0	1	21	1	21	1.09e-06	39.2
mdm_miRNA34	ath-miR393a	100.000	21	0	0	1	21	1	21	1.09e-06	39.2
mdm_miRNA34	aly-miR393b	100.000	21	0	0	1	21	1	21	1.09e-06	39.2
mdm_miRNA34	aly-miR393a	100.000	21	0	0	1	21	1	21	1.09e-06	39.2
# BLASTN 2.10.1+
# Query: mdm_miRNA35
# Database: /home/leclercqj/Apple/all_mature_PNRD.fadb
# 0 hits found
# BLASTN 2.10.1+
# Query: mdm_miRNA36
# Database: /home/leclercqj/Apple/all_mature_PNRD.fadb
# 0 hits found
# BLASTN 2.10.1+
# Query: mdm_miRNA37
# Database: /home/leclercqj/Apple/all_mature_PNRD.fadb
# Fields: query acc.ver, subject acc.ver, % identity, alignment length, mismatches, gap opens, q. start, q. end, s. start, s. end, evalue, bit score
# 50 hits found
mdm_miRNA37	zma-miR164h	100.000	21	0	0	1	21	1	21	1.23e-06	39.2
mdm_miRNA37	zma-miR164g	100.000	21	0	0	1	21	1	21	1.23e-06	39.2
mdm_miRNA37	zma-miR164f	100.000	21	0	0	1	21	1	21	1.23e-06	39.2
mdm_miRNA37	zma-miR164e	100.000	21	0	0	1	21	1	21	1.23e-06	39.2
mdm_miRNA37	zma-miR164d	100.000	21	0	0	1	21	1	21	1.23e-06	39.2
mdm_miRNA37	zma-miR164c	100.000	21	0	0	1	21	1	21	1.23e-06	39.2
mdm_miRNA37	zma-miR164b	100.000	21	0	0	1	21	1	21	1.23e-06	39.2
mdm_miRNA37	zma-miR164a	100.000	21	0	0	1	21	1	21	1.23e-06	39.2
mdm_miRNA37	vvi-miR164d	100.000	21	0	0	1	21	1	21	1.23e-06	39.2
mdm_miRNA37	vvi-miR164c	100.000	21	0	0	1	21	1	21	1.23e-06	39.2
mdm_miRNA37	vvi-miR164a	100.000	21	0	0	1	21	1	21	1.23e-06	39.2
mdm_miRNA37	vun-miR164a.4	100.000	21	0	0	1	21	1	21	1.23e-06	39.2
mdm_miRNA37	vun-miR164a.3	100.000	21	0	0	1	21	1	21	1.23e-06	39.2
mdm_miRNA37	vun-miR164a.2	100.000	21	0	0	1	21	1	21	1.23e-06	39.2
mdm_miRNA37	vun-miR164a.1	100.000	21	0	0	1	21	1	21	1.23e-06	39.2
mdm_miRNA37	tcc-miR164b	100.000	21	0	0	1	21	1	21	1.23e-06	39.2
mdm_miRNA37	tcc-miR164a	100.000	21	0	0	1	21	1	21	1.23e-06	39.2
mdm_miRNA37	tae-miR164b	100.000	21	0	0	1	21	1	21	1.23e-06	39.2
mdm_miRNA37	tae-miR164	100.000	21	0	0	1	21	1	21	1.23e-06	39.2
mdm_miRNA37	sit-miR164a	100.000	21	0	0	1	21	1	21	1.23e-06	39.2
mdm_miRNA37	sbi-miR164e	100.000	21	0	0	1	21	1	21	1.23e-06	39.2
mdm_miRNA37	sbi-miR164d	100.000	21	0	0	1	21	1	21	1.23e-06	39.2
mdm_miRNA37	sbi-miR164	100.000	21	0	0	1	21	1	21	1.23e-06	39.2
mdm_miRNA37	rco-miR164c	100.000	21	0	0	1	21	1	21	1.23e-06	39.2
mdm_miRNA37	rco-miR164b	100.000	21	0	0	1	21	1	21	1.23e-06	39.2
mdm_miRNA37	rco-miR164a	100.000	21	0	0	1	21	1	21	1.23e-06	39.2
mdm_miRNA37	ptc-miRf10040-akr	100.000	21	0	0	1	21	21	1	1.23e-06	39.2
mdm_miRNA37	ptc-miR164e	100.000	21	0	0	1	21	1	21	1.23e-06	39.2
mdm_miRNA37	ptc-miR164d	100.000	21	0	0	1	21	1	21	1.23e-06	39.2
mdm_miRNA37	ptc-miR164c	100.000	21	0	0	1	21	1	21	1.23e-06	39.2
mdm_miRNA37	ptc-miR164b	100.000	21	0	0	1	21	1	21	1.23e-06	39.2
mdm_miRNA37	ptc-miR164a	100.000	21	0	0	1	21	1	21	1.23e-06	39.2
mdm_miRNA37	ppl-miR164	100.000	21	0	0	1	21	1	21	1.23e-06	39.2
mdm_miRNA37	osa-miR164f	100.000	21	0	0	1	21	1	21	1.23e-06	39.2
mdm_miRNA37	osa-miR164b	100.000	21	0	0	1	21	1	21	1.23e-06	39.2
mdm_miRNA37	osa-miR164a	100.000	21	0	0	1	21	1	21	1.23e-06	39.2
mdm_miRNA37	mtr-miR164c	100.000	21	0	0	1	21	1	21	1.23e-06	39.2
mdm_miRNA37	mtr-miR164b	100.000	21	0	0	1	21	1	21	1.23e-06	39.2
mdm_miRNA37	mtr-miR164a	100.000	21	0	0	1	21	1	21	1.23e-06	39.2
mdm_miRNA37	gma-miR164	100.000	21	0	0	1	21	1	21	1.23e-06	39.2
mdm_miRNA37	ghr-miR164	100.000	21	0	0	1	21	1	21	1.23e-06	39.2
mdm_miRNA37	ctr-miR164	100.000	21	0	0	1	21	1	21	1.23e-06	39.2
mdm_miRNA37	csi-miR164	100.000	21	0	0	1	21	1	21	1.23e-06	39.2
mdm_miRNA37	cav-miR164	100.000	21	0	0	1	21	1	21	1.23e-06	39.2
mdm_miRNA37	bra-miR164a	100.000	21	0	0	1	21	1	21	1.23e-06	39.2
mdm_miRNA37	bna-miR164	100.000	21	0	0	1	21	1	21	1.23e-06	39.2
mdm_miRNA37	bdi-miR164e	100.000	21	0	0	1	21	1	21	1.23e-06	39.2
mdm_miRNA37	bdi-miR164d	100.000	21	0	0	1	21	1	21	1.23e-06	39.2
mdm_miRNA37	bdi-miR164b	100.000	21	0	0	1	21	1	21	1.23e-06	39.2
mdm_miRNA37	bdi-miR164a	100.000	21	0	0	1	21	1	21	1.23e-06	39.2
# BLASTN 2.10.1+
# Query: mdm_miRNA38
# Database: /home/leclercqj/Apple/all_mature_PNRD.fadb
# 0 hits found
# BLASTN 2.10.1+
# Query: mdm_miRNA39
# Database: /home/leclercqj/Apple/all_mature_PNRD.fadb
# Fields: query acc.ver, subject acc.ver, % identity, alignment length, mismatches, gap opens, q. start, q. end, s. start, s. end, evalue, bit score
# 20 hits found
mdm_miRNA39	vvi-miR319e	100.000	20	0	0	2	21	2	21	4.29e-06	37.4
mdm_miRNA39	vun-miR319e.2	100.000	20	0	0	2	21	2	21	4.29e-06	37.4
mdm_miRNA39	vun-miR319e.1	100.000	20	0	0	2	21	2	21	4.29e-06	37.4
mdm_miRNA39	tcc-miR319	100.000	20	0	0	2	21	2	21	4.29e-06	37.4
mdm_miRNA39	rco-miR319d	100.000	20	0	0	2	21	1	20	4.29e-06	37.4
mdm_miRNA39	pvu-miR319c	100.000	20	0	0	2	21	1	20	4.29e-06	37.4
mdm_miRNA39	ptc-miR319h	100.000	20	0	0	2	21	1	20	4.29e-06	37.4
mdm_miRNA39	ptc-miR319g	100.000	20	0	0	2	21	1	20	4.29e-06	37.4
mdm_miRNA39	ptc-miR319f	100.000	20	0	0	2	21	1	20	4.29e-06	37.4
mdm_miRNA39	ptc-miR319e	100.000	20	0	0	2	21	1	20	4.29e-06	37.4
mdm_miRNA39	ppt-miR319e	100.000	20	0	0	1	20	1	20	4.29e-06	37.4
mdm_miRNA39	ppt-miR319d	100.000	20	0	0	1	20	1	20	4.29e-06	37.4
mdm_miRNA39	ppt-miR319c	100.000	20	0	0	1	20	1	20	4.29e-06	37.4
mdm_miRNA39	ppt-miR319b	100.000	20	0	0	1	20	1	20	4.29e-06	37.4
mdm_miRNA39	ppt-miR319a	100.000	20	0	0	1	20	1	20	4.29e-06	37.4
mdm_miRNA39	ppl-miR319	100.000	20	0	0	2	21	1	20	4.29e-06	37.4
mdm_miRNA39	csi-miR319	100.000	20	0	0	2	21	2	21	4.29e-06	37.4
mdm_miRNA39	ath-miR319c	100.000	20	0	0	2	21	1	20	4.29e-06	37.4
mdm_miRNA39	aly-miR319d	100.000	20	0	0	2	21	1	20	4.29e-06	37.4
mdm_miRNA39	aly-miR319c	100.000	20	0	0	2	21	1	20	4.29e-06	37.4
# BLASTN 2.10.1+
# Query: mdm_miRNA40
# Database: /home/leclercqj/Apple/all_mature_PNRD.fadb
# 0 hits found
# BLASTN 2.10.1+
# Query: mdm_miRNA41
# Database: /home/leclercqj/Apple/all_mature_PNRD.fadb
# Fields: query acc.ver, subject acc.ver, % identity, alignment length, mismatches, gap opens, q. start, q. end, s. start, s. end, evalue, bit score
# 42 hits found
mdm_miRNA41	ath-miR159b	100.000	21	0	0	1	21	1	21	1.23e-06	39.2
mdm_miRNA41	aly-miR159b	100.000	21	0	0	1	21	1	21	1.23e-06	39.2
mdm_miRNA41	zma-miR159m	100.000	20	0	0	1	20	1	20	4.29e-06	37.4
mdm_miRNA41	zma-miR159k	100.000	20	0	0	1	20	1	20	4.29e-06	37.4
mdm_miRNA41	zma-miR159j	100.000	20	0	0	1	20	1	20	4.29e-06	37.4
mdm_miRNA41	zma-miR159b	100.000	20	0	0	1	20	1	20	4.29e-06	37.4
mdm_miRNA41	zma-miR159a	100.000	20	0	0	1	20	1	20	4.29e-06	37.4
mdm_miRNA41	vvi-miR159c	100.000	20	0	0	1	20	1	20	4.29e-06	37.4
mdm_miRNA41	vun-miR159a	100.000	20	0	0	1	20	1	20	4.29e-06	37.4
mdm_miRNA41	tae-miR159b	100.000	20	0	0	1	20	1	20	4.29e-06	37.4
mdm_miRNA41	tae-miR159a	100.000	20	0	0	1	20	1	20	4.29e-06	37.4
mdm_miRNA41	ssp-miR159a	100.000	20	0	0	1	20	1	20	4.29e-06	37.4
mdm_miRNA41	spr-miR159	100.000	20	0	0	1	20	1	20	4.29e-06	37.4
mdm_miRNA41	sof-miR159d	100.000	20	0	0	1	20	1	20	4.29e-06	37.4
mdm_miRNA41	sof-miR159b	100.000	20	0	0	1	20	1	20	4.29e-06	37.4
mdm_miRNA41	sof-miR159a	100.000	20	0	0	1	20	1	20	4.29e-06	37.4
mdm_miRNA41	sly-miR159	100.000	20	0	0	1	20	1	20	4.29e-06	37.4
mdm_miRNA41	sbi-miR159	100.000	20	0	0	1	20	1	20	4.29e-06	37.4
mdm_miRNA41	sar-miR159	100.000	20	0	0	1	20	1	20	4.29e-06	37.4
mdm_miRNA41	rco-miR159	100.000	20	0	0	1	20	1	20	4.29e-06	37.4
mdm_miRNA41	pvu-miR159	100.000	20	0	0	1	20	1	20	4.29e-06	37.4
mdm_miRNA41	ptc-miR159c	100.000	20	0	0	1	20	1	20	4.29e-06	37.4
mdm_miRNA41	ptc-miR159b	100.000	20	0	0	1	20	1	20	4.29e-06	37.4
mdm_miRNA41	ptc-miR159a	100.000	20	0	0	1	20	1	20	4.29e-06	37.4
mdm_miRNA41	pgl-miR159	100.000	20	0	0	1	20	1	20	4.29e-06	37.4
mdm_miRNA41	osa-miR159m	100.000	20	0	0	1	20	1	20	4.29e-06	37.4
mdm_miRNA41	osa-miR159b	100.000	20	0	0	1	20	1	20	4.29e-06	37.4
mdm_miRNA41	osa-miR159a	100.000	20	0	0	1	20	1	20	4.29e-06	37.4
mdm_miRNA41	oru-miR159	100.000	20	0	0	1	20	1	20	4.29e-06	37.4
mdm_miRNA41	mtr-miR159c	100.000	20	0	0	1	20	1	20	4.29e-06	37.4
mdm_miRNA41	mtr-miR159a	100.000	20	0	0	1	20	1	20	4.29e-06	37.4
mdm_miRNA41	ltu-miR159	100.000	20	0	0	1	20	1	20	4.29e-06	37.4
mdm_miRNA41	hvu-miR159b	100.000	20	0	0	1	20	1	20	4.29e-06	37.4
mdm_miRNA41	hvu-miR159a	100.000	20	0	0	1	20	1	20	4.29e-06	37.4
mdm_miRNA41	gma-miR159a	100.000	20	0	0	1	20	1	20	4.29e-06	37.4
mdm_miRNA41	far-miR159	100.000	20	0	0	1	20	1	20	4.29e-06	37.4
mdm_miRNA41	csi-miR159	100.000	20	0	0	1	20	1	20	4.29e-06	37.4
mdm_miRNA41	bra-miR159a	100.000	20	0	0	1	20	1	20	4.29e-06	37.4
mdm_miRNA41	bna-miR159	100.000	20	0	0	1	20	1	20	4.29e-06	37.4
mdm_miRNA41	ath-miR159a	100.000	20	0	0	1	20	1	20	4.29e-06	37.4
mdm_miRNA41	aly-miR159a	100.000	20	0	0	1	20	1	20	4.29e-06	37.4
mdm_miRNA41	ahy-miR159	100.000	20	0	0	1	20	1	20	4.29e-06	37.4
# BLASTN 2.10.1+
# Query: mdm_miRNA42
# Database: /home/leclercqj/Apple/all_mature_PNRD.fadb
# Fields: query acc.ver, subject acc.ver, % identity, alignment length, mismatches, gap opens, q. start, q. end, s. start, s. end, evalue, bit score
# 20 hits found
mdm_miRNA42	zma-miR166m	100.000	21	0	0	1	21	1	21	1.23e-06	39.2
mdm_miRNA42	zma-miR166l	100.000	21	0	0	1	21	1	21	1.23e-06	39.2
mdm_miRNA42	tcc-miR166c	100.000	21	0	0	1	21	1	21	1.23e-06	39.2
mdm_miRNA42	sit-miR166c	100.000	21	0	0	1	21	1	21	1.23e-06	39.2
mdm_miRNA42	sbi-miR166f	100.000	21	0	0	1	21	1	21	1.23e-06	39.2
mdm_miRNA42	pab-miR166a	100.000	21	0	0	1	21	1	21	1.23e-06	39.2
mdm_miRNA42	osa-miR166h	100.000	21	0	0	1	21	1	21	1.23e-06	39.2
mdm_miRNA42	osa-miR166g	100.000	21	0	0	1	21	1	21	1.23e-06	39.2
mdm_miRNA42	mtr-miR166f	100.000	21	0	0	1	21	1	21	1.23e-06	39.2
mdm_miRNA42	mtr-miR166c	100.000	21	0	0	1	21	1	21	1.23e-06	39.2
mdm_miRNA42	ini-miR166	100.000	21	0	0	1	21	1	21	1.23e-06	39.2
mdm_miRNA42	aqc-miR166d	100.000	21	0	0	1	21	1	21	1.23e-06	39.2
mdm_miRNA42	aqc-miR166a	100.000	21	0	0	1	21	1	21	1.23e-06	39.2
mdm_miRNA42	sbi-miR166k	100.000	20	0	0	1	20	1	20	4.29e-06	37.4
mdm_miRNA42	ptc-miR166q	100.000	20	0	0	1	20	1	20	4.29e-06	37.4
mdm_miRNA42	ptc-miR166o	100.000	20	0	0	1	20	1	20	4.29e-06	37.4
mdm_miRNA42	ptc-miR166n	100.000	20	0	0	1	20	1	20	4.29e-06	37.4
mdm_miRNA42	pga-miR166	100.000	20	0	0	1	20	1	20	4.29e-06	37.4
mdm_miRNA42	pab-miR166b	100.000	20	0	0	1	20	1	20	4.29e-06	37.4
mdm_miRNA42	aqc-miR166c	100.000	20	0	0	1	20	1	20	4.29e-06	37.4
# BLASTN 2.10.1+
# Query: mdm_miRNA43
# Database: /home/leclercqj/Apple/all_mature_PNRD.fadb
# 0 hits found
# BLASTN 2.10.1+
# Query: mdm_miRNA44
# Database: /home/leclercqj/Apple/all_mature_PNRD.fadb
# Fields: query acc.ver, subject acc.ver, % identity, alignment length, mismatches, gap opens, q. start, q. end, s. start, s. end, evalue, bit score
# 1 hits found
mdm_miRNA44	aly-miR396a*	100.000	20	0	0	1	20	2	21	3.75e-06	37.4
# BLASTN 2.10.1+
# Query: mdm_miRNA45
# Database: /home/leclercqj/Apple/all_mature_PNRD.fadb
# Fields: query acc.ver, subject acc.ver, % identity, alignment length, mismatches, gap opens, q. start, q. end, s. start, s. end, evalue, bit score
# 26 hits found
mdm_miRNA45	zma-miR162b	100.000	21	0	0	1	21	1	21	1.23e-06	39.2
mdm_miRNA45	vvi-miR162	100.000	21	0	0	1	21	1	21	1.23e-06	39.2
mdm_miRNA45	vun-miR162b.1	100.000	21	0	0	1	21	1	21	1.23e-06	39.2
mdm_miRNA45	tcc-miR162	100.000	21	0	0	1	21	1	21	1.23e-06	39.2
mdm_miRNA45	sly-miR162	100.000	21	0	0	1	21	1	21	1.23e-06	39.2
mdm_miRNA45	sbi-miR162	100.000	21	0	0	1	21	1	21	1.23e-06	39.2
mdm_miRNA45	rco-miR162	100.000	21	0	0	1	21	1	21	1.23e-06	39.2
mdm_miRNA45	ptc-miR162c	100.000	21	0	0	1	21	1	21	1.23e-06	39.2
mdm_miRNA45	ptc-miR162b	100.000	21	0	0	1	21	1	21	1.23e-06	39.2
mdm_miRNA45	ptc-miR162a	100.000	21	0	0	1	21	1	21	1.23e-06	39.2
mdm_miRNA45	osa-miR162a	100.000	21	0	0	1	21	1	21	1.23e-06	39.2
mdm_miRNA45	mtr-miR162d	100.000	21	0	0	1	21	1	21	1.23e-06	39.2
mdm_miRNA45	mtr-miR162	100.000	21	0	0	1	21	1	21	1.23e-06	39.2
mdm_miRNA45	lsa-miR162	100.000	21	0	0	1	21	1	21	1.23e-06	39.2
mdm_miRNA45	llu-miR162	100.000	21	0	0	1	21	1	21	1.23e-06	39.2
mdm_miRNA45	gma-miR162m	100.000	21	0	0	1	21	1	21	1.23e-06	39.2
mdm_miRNA45	gma-miR162a	100.000	21	0	0	1	21	1	21	1.23e-06	39.2
mdm_miRNA45	ghr-miR162a	100.000	21	0	0	1	21	1	21	1.23e-06	39.2
mdm_miRNA45	csi-miR162	100.000	21	0	0	1	21	1	21	1.23e-06	39.2
mdm_miRNA45	cpa-miR162a	100.000	21	0	0	1	21	1	21	1.23e-06	39.2
mdm_miRNA45	ath-miR162b	100.000	21	0	0	1	21	1	21	1.23e-06	39.2
mdm_miRNA45	ath-miR162a	100.000	21	0	0	1	21	1	21	1.23e-06	39.2
mdm_miRNA45	aly-miR162b	100.000	21	0	0	1	21	1	21	1.23e-06	39.2
mdm_miRNA45	aly-miR162a	100.000	21	0	0	1	21	1	21	1.23e-06	39.2
mdm_miRNA45	zma-miR162	100.000	20	0	0	1	20	1	20	4.29e-06	37.4
mdm_miRNA45	mtr-miR162b	100.000	20	0	0	1	20	1	20	4.29e-06	37.4
# BLASTN 2.10.1+
# Query: mdm_miRNA46
# Database: /home/leclercqj/Apple/all_mature_PNRD.fadb
# Fields: query acc.ver, subject acc.ver, % identity, alignment length, mismatches, gap opens, q. start, q. end, s. start, s. end, evalue, bit score
# 50 hits found
mdm_miRNA46	osa-miR166m	100.000	21	0	0	1	21	1	21	1.23e-06	39.2
mdm_miRNA46	gma-miR166r	100.000	21	0	0	1	21	1	21	1.23e-06	39.2
mdm_miRNA46	csi-miR166d	100.000	21	0	0	1	21	1	21	1.23e-06	39.2
mdm_miRNA46	crt-miR166b	100.000	21	0	0	1	21	1	21	1.23e-06	39.2
mdm_miRNA46	zma-miR166t	100.000	20	0	0	1	20	1	20	4.29e-06	37.4
mdm_miRNA46	zma-miR166s	100.000	20	0	0	1	20	1	20	4.29e-06	37.4
mdm_miRNA46	zma-miR166r	100.000	20	0	0	1	20	1	20	4.29e-06	37.4
mdm_miRNA46	zma-miR166q	100.000	20	0	0	1	20	1	20	4.29e-06	37.4
mdm_miRNA46	zma-miR166p	100.000	20	0	0	1	20	1	20	4.29e-06	37.4
mdm_miRNA46	zma-miR166o	100.000	20	0	0	1	20	1	20	4.29e-06	37.4
mdm_miRNA46	zma-miR166n	100.000	20	0	0	1	20	1	20	4.29e-06	37.4
mdm_miRNA46	zma-miR166i	100.000	20	0	0	1	20	1	20	4.29e-06	37.4
mdm_miRNA46	zma-miR166h	100.000	20	0	0	1	20	1	20	4.29e-06	37.4
mdm_miRNA46	zma-miR166g	100.000	20	0	0	1	20	1	20	4.29e-06	37.4
mdm_miRNA46	zma-miR166f	100.000	20	0	0	1	20	1	20	4.29e-06	37.4
mdm_miRNA46	zma-miR166e	100.000	20	0	0	1	20	1	20	4.29e-06	37.4
mdm_miRNA46	zma-miR166d	100.000	20	0	0	1	20	1	20	4.29e-06	37.4
mdm_miRNA46	zma-miR166c	100.000	20	0	0	1	20	1	20	4.29e-06	37.4
mdm_miRNA46	zma-miR166b	100.000	20	0	0	1	20	1	20	4.29e-06	37.4
mdm_miRNA46	zma-miR166a	100.000	20	0	0	1	20	1	20	4.29e-06	37.4
mdm_miRNA46	vvi-miR166h	100.000	20	0	0	1	20	1	20	4.29e-06	37.4
mdm_miRNA46	vvi-miR166g	100.000	20	0	0	1	20	1	20	4.29e-06	37.4
mdm_miRNA46	vvi-miR166f	100.000	20	0	0	1	20	1	20	4.29e-06	37.4
mdm_miRNA46	vvi-miR166e	100.000	20	0	0	1	20	1	20	4.29e-06	37.4
mdm_miRNA46	vvi-miR166d	100.000	20	0	0	1	20	1	20	4.29e-06	37.4
mdm_miRNA46	vvi-miR166c	100.000	20	0	0	1	20	1	20	4.29e-06	37.4
mdm_miRNA46	vun-miR166d.3	100.000	20	0	0	1	20	1	20	4.29e-06	37.4
mdm_miRNA46	vun-miR166d.2	100.000	20	0	0	1	20	1	20	4.29e-06	37.4
mdm_miRNA46	vun-miR166d.1	100.000	20	0	0	1	20	1	20	4.29e-06	37.4
mdm_miRNA46	vun-miR166b.1	100.000	20	0	0	1	20	1	20	4.29e-06	37.4
mdm_miRNA46	tcc-miR166d	100.000	20	0	0	1	20	1	20	4.29e-06	37.4
mdm_miRNA46	tcc-miR166b	100.000	20	0	0	1	20	1	20	4.29e-06	37.4
mdm_miRNA46	tcc-miR166a	100.000	20	0	0	1	20	1	20	4.29e-06	37.4
mdm_miRNA46	sof-miR166	100.000	20	0	0	1	20	1	20	4.29e-06	37.4
mdm_miRNA46	smo-miR166c	100.000	20	0	0	1	20	1	20	4.29e-06	37.4
mdm_miRNA46	smo-miR166b	100.000	20	0	0	1	20	1	20	4.29e-06	37.4
mdm_miRNA46	smo-miR166a	100.000	20	0	0	1	20	1	20	4.29e-06	37.4
mdm_miRNA46	sly-miR166b	100.000	20	0	0	1	20	1	20	4.29e-06	37.4
mdm_miRNA46	sly-miR166a	100.000	20	0	0	1	20	1	20	4.29e-06	37.4
mdm_miRNA46	sit-miR60-npr	100.000	20	0	0	1	20	1	20	4.29e-06	37.4
mdm_miRNA46	sit-miR59-npr	100.000	20	0	0	1	20	1	20	4.29e-06	37.4
mdm_miRNA46	sit-miR58-3-npr	100.000	20	0	0	1	20	1	20	4.29e-06	37.4
mdm_miRNA46	sit-miR58-2-npr	100.000	20	0	0	1	20	1	20	4.29e-06	37.4
mdm_miRNA46	sit-miR58-1-npr	100.000	20	0	0	1	20	1	20	4.29e-06	37.4
mdm_miRNA46	sit-miR21-2-npr	100.000	20	0	0	1	20	2	21	4.29e-06	37.4
mdm_miRNA46	sit-miR21-1-npr	100.000	20	0	0	1	20	2	21	4.29e-06	37.4
mdm_miRNA46	sit-miR166a-5	100.000	20	0	0	1	20	1	20	4.29e-06	37.4
mdm_miRNA46	sit-miR166a-4	100.000	20	0	0	1	20	1	20	4.29e-06	37.4
mdm_miRNA46	sit-miR166a-3	100.000	20	0	0	1	20	1	20	4.29e-06	37.4
mdm_miRNA46	sit-miR166a-2	100.000	20	0	0	1	20	1	20	4.29e-06	37.4
# BLASTN 2.10.1+
# Query: mdm_miRNA47
# Database: /home/leclercqj/Apple/all_mature_PNRD.fadb
# 0 hits found
# BLASTN 2.10.1+
# Query: mdm_miRNA48
# Database: /home/leclercqj/Apple/all_mature_PNRD.fadb
# Fields: query acc.ver, subject acc.ver, % identity, alignment length, mismatches, gap opens, q. start, q. end, s. start, s. end, evalue, bit score
# 50 hits found
mdm_miRNA48	gma-miR166q	100.000	21	0	0	1	21	1	21	1.23e-06	39.2
mdm_miRNA48	csi-miR166b	100.000	21	0	0	1	21	1	21	1.23e-06	39.2
mdm_miRNA48	crt-miR166a	100.000	21	0	0	1	21	1	21	1.23e-06	39.2
mdm_miRNA48	zma-miR166t	100.000	20	0	0	1	20	1	20	4.29e-06	37.4
mdm_miRNA48	zma-miR166s	100.000	20	0	0	1	20	1	20	4.29e-06	37.4
mdm_miRNA48	zma-miR166r	100.000	20	0	0	1	20	1	20	4.29e-06	37.4
mdm_miRNA48	zma-miR166q	100.000	20	0	0	1	20	1	20	4.29e-06	37.4
mdm_miRNA48	zma-miR166p	100.000	20	0	0	1	20	1	20	4.29e-06	37.4
mdm_miRNA48	zma-miR166o	100.000	20	0	0	1	20	1	20	4.29e-06	37.4
mdm_miRNA48	zma-miR166n	100.000	20	0	0	1	20	1	20	4.29e-06	37.4
mdm_miRNA48	zma-miR166i	100.000	20	0	0	1	20	1	20	4.29e-06	37.4
mdm_miRNA48	zma-miR166h	100.000	20	0	0	1	20	1	20	4.29e-06	37.4
mdm_miRNA48	zma-miR166g	100.000	20	0	0	1	20	1	20	4.29e-06	37.4
mdm_miRNA48	zma-miR166f	100.000	20	0	0	1	20	1	20	4.29e-06	37.4
mdm_miRNA48	zma-miR166e	100.000	20	0	0	1	20	1	20	4.29e-06	37.4
mdm_miRNA48	zma-miR166d	100.000	20	0	0	1	20	1	20	4.29e-06	37.4
mdm_miRNA48	zma-miR166c	100.000	20	0	0	1	20	1	20	4.29e-06	37.4
mdm_miRNA48	zma-miR166b	100.000	20	0	0	1	20	1	20	4.29e-06	37.4
mdm_miRNA48	zma-miR166a	100.000	20	0	0	1	20	1	20	4.29e-06	37.4
mdm_miRNA48	vvi-miR166h	100.000	20	0	0	1	20	1	20	4.29e-06	37.4
mdm_miRNA48	vvi-miR166g	100.000	20	0	0	1	20	1	20	4.29e-06	37.4
mdm_miRNA48	vvi-miR166f	100.000	20	0	0	1	20	1	20	4.29e-06	37.4
mdm_miRNA48	vvi-miR166e	100.000	20	0	0	1	20	1	20	4.29e-06	37.4
mdm_miRNA48	vvi-miR166d	100.000	20	0	0	1	20	1	20	4.29e-06	37.4
mdm_miRNA48	vvi-miR166c	100.000	20	0	0	1	20	1	20	4.29e-06	37.4
mdm_miRNA48	vun-miR166d.3	100.000	20	0	0	1	20	1	20	4.29e-06	37.4
mdm_miRNA48	vun-miR166d.2	100.000	20	0	0	1	20	1	20	4.29e-06	37.4
mdm_miRNA48	vun-miR166d.1	100.000	20	0	0	1	20	1	20	4.29e-06	37.4
mdm_miRNA48	vun-miR166b.1	100.000	20	0	0	1	20	1	20	4.29e-06	37.4
mdm_miRNA48	tcc-miR166d	100.000	20	0	0	1	20	1	20	4.29e-06	37.4
mdm_miRNA48	tcc-miR166b	100.000	20	0	0	1	20	1	20	4.29e-06	37.4
mdm_miRNA48	tcc-miR166a	100.000	20	0	0	1	20	1	20	4.29e-06	37.4
mdm_miRNA48	sof-miR166	100.000	20	0	0	1	20	1	20	4.29e-06	37.4
mdm_miRNA48	smo-miR166c	100.000	20	0	0	1	20	1	20	4.29e-06	37.4
mdm_miRNA48	smo-miR166b	100.000	20	0	0	1	20	1	20	4.29e-06	37.4
mdm_miRNA48	smo-miR166a	100.000	20	0	0	1	20	1	20	4.29e-06	37.4
mdm_miRNA48	sly-miR166b	100.000	20	0	0	1	20	1	20	4.29e-06	37.4
mdm_miRNA48	sly-miR166a	100.000	20	0	0	1	20	1	20	4.29e-06	37.4
mdm_miRNA48	sit-miR60-npr	100.000	20	0	0	1	20	1	20	4.29e-06	37.4
mdm_miRNA48	sit-miR59-npr	100.000	20	0	0	1	20	1	20	4.29e-06	37.4
mdm_miRNA48	sit-miR58-3-npr	100.000	20	0	0	1	20	1	20	4.29e-06	37.4
mdm_miRNA48	sit-miR58-2-npr	100.000	20	0	0	1	20	1	20	4.29e-06	37.4
mdm_miRNA48	sit-miR58-1-npr	100.000	20	0	0	1	20	1	20	4.29e-06	37.4
mdm_miRNA48	sit-miR21-2-npr	100.000	20	0	0	1	20	2	21	4.29e-06	37.4
mdm_miRNA48	sit-miR21-1-npr	100.000	20	0	0	1	20	2	21	4.29e-06	37.4
mdm_miRNA48	sit-miR166a-5	100.000	20	0	0	1	20	1	20	4.29e-06	37.4
mdm_miRNA48	sit-miR166a-4	100.000	20	0	0	1	20	1	20	4.29e-06	37.4
mdm_miRNA48	sit-miR166a-3	100.000	20	0	0	1	20	1	20	4.29e-06	37.4
mdm_miRNA48	sit-miR166a-2	100.000	20	0	0	1	20	1	20	4.29e-06	37.4
mdm_miRNA48	sit-miR166a-1	100.000	20	0	0	1	20	1	20	4.29e-06	37.4
# BLASTN 2.10.1+
# Query: mdm_miRNA49
# Database: /home/leclercqj/Apple/all_mature_PNRD.fadb
# Fields: query acc.ver, subject acc.ver, % identity, alignment length, mismatches, gap opens, q. start, q. end, s. start, s. end, evalue, bit score
# 20 hits found
mdm_miRNA49	vvi-miR403f	100.000	21	0	0	1	21	1	21	1.23e-06	39.2
mdm_miRNA49	vvi-miR403e	100.000	21	0	0	1	21	1	21	1.23e-06	39.2
mdm_miRNA49	vvi-miR403d	100.000	21	0	0	1	21	1	21	1.23e-06	39.2
mdm_miRNA49	vvi-miR403c	100.000	21	0	0	1	21	1	21	1.23e-06	39.2
mdm_miRNA49	vvi-miR403b	100.000	21	0	0	1	21	1	21	1.23e-06	39.2
mdm_miRNA49	vvi-miR403a	100.000	21	0	0	1	21	1	21	1.23e-06	39.2
mdm_miRNA49	tcc-miR403b	100.000	21	0	0	1	21	1	21	1.23e-06	39.2
mdm_miRNA49	tcc-miR403a	100.000	21	0	0	1	21	1	21	1.23e-06	39.2
mdm_miRNA49	rco-miR403b	100.000	21	0	0	1	21	1	21	1.23e-06	39.2
mdm_miRNA49	rco-miR403a	100.000	21	0	0	1	21	1	21	1.23e-06	39.2
mdm_miRNA49	ptc-miR403c	100.000	21	0	0	1	21	1	21	1.23e-06	39.2
mdm_miRNA49	ptc-miR403b	100.000	21	0	0	1	21	1	21	1.23e-06	39.2
mdm_miRNA49	ptc-miR403a	100.000	21	0	0	1	21	1	21	1.23e-06	39.2
mdm_miRNA49	ppl-miR403	100.000	21	0	0	1	21	1	21	1.23e-06	39.2
mdm_miRNA49	csi-miR403	100.000	21	0	0	1	21	1	21	1.23e-06	39.2
mdm_miRNA49	bst-miR403	100.000	21	0	0	1	21	1	21	1.23e-06	39.2
mdm_miRNA49	ath-miR403	100.000	21	0	0	1	21	1	21	1.23e-06	39.2
mdm_miRNA49	aly-miR403	100.000	21	0	0	1	21	1	21	1.23e-06	39.2
mdm_miRNA49	stu-miR403	100.000	20	0	0	2	21	2	21	4.29e-06	37.4
mdm_miRNA49	cpa-miR403	100.000	20	0	0	2	21	2	21	4.29e-06	37.4
# BLASTN 2.10.1+
# Query: mdm_miRNA50
# Database: /home/leclercqj/Apple/all_mature_PNRD.fadb
# 0 hits found
# BLASTN 2.10.1+
# Query: mdm_miRNA51
# Database: /home/leclercqj/Apple/all_mature_PNRD.fadb
# 0 hits found
# BLASTN 2.10.1+
# Query: mdm_miRNA52
# Database: /home/leclercqj/Apple/all_mature_PNRD.fadb
# Fields: query acc.ver, subject acc.ver, % identity, alignment length, mismatches, gap opens, q. start, q. end, s. start, s. end, evalue, bit score
# 6 hits found
mdm_miRNA52	hce-miR165	100.000	21	0	0	1	21	1	21	1.23e-06	39.2
mdm_miRNA52	flm-miR166	100.000	21	0	0	1	21	1	21	1.23e-06	39.2
mdm_miRNA52	ath-miR165b	100.000	21	0	0	1	21	1	21	1.23e-06	39.2
mdm_miRNA52	ath-miR165a	100.000	21	0	0	1	21	1	21	1.23e-06	39.2
mdm_miRNA52	aly-miR165b	100.000	20	0	0	1	20	1	20	4.29e-06	37.4
mdm_miRNA52	aly-miR165a	100.000	20	0	0	1	20	1	20	4.29e-06	37.4
# BLASTN 2.10.1+
# Query: mdm_miRNA53
# Database: /home/leclercqj/Apple/all_mature_PNRD.fadb
# 0 hits found
# BLASTN 2.10.1+
# Query: mdm_miRNA54
# Database: /home/leclercqj/Apple/all_mature_PNRD.fadb
# Fields: query acc.ver, subject acc.ver, % identity, alignment length, mismatches, gap opens, q. start, q. end, s. start, s. end, evalue, bit score
# 50 hits found
mdm_miRNA54	sit-miR58-3-npr	100.000	22	0	0	1	22	1	22	3.11e-07	41.0
mdm_miRNA54	sit-miR58-2-npr	100.000	22	0	0	1	22	1	22	3.11e-07	41.0
mdm_miRNA54	sit-miR58-1-npr	100.000	22	0	0	1	22	1	22	3.11e-07	41.0
mdm_miRNA54	zma-miR166t	100.000	21	0	0	1	21	1	21	1.09e-06	39.2
mdm_miRNA54	zma-miR166s	100.000	21	0	0	1	21	1	21	1.09e-06	39.2
mdm_miRNA54	zma-miR166r	100.000	21	0	0	1	21	1	21	1.09e-06	39.2
mdm_miRNA54	zma-miR166q	100.000	21	0	0	1	21	1	21	1.09e-06	39.2
mdm_miRNA54	zma-miR166p	100.000	21	0	0	1	21	1	21	1.09e-06	39.2
mdm_miRNA54	zma-miR166o	100.000	21	0	0	1	21	1	21	1.09e-06	39.2
mdm_miRNA54	zma-miR166n	100.000	21	0	0	1	21	1	21	1.09e-06	39.2
mdm_miRNA54	zma-miR166a	100.000	21	0	0	1	21	1	21	1.09e-06	39.2
mdm_miRNA54	vvi-miR166h	100.000	21	0	0	1	21	1	21	1.09e-06	39.2
mdm_miRNA54	vvi-miR166g	100.000	21	0	0	1	21	1	21	1.09e-06	39.2
mdm_miRNA54	vvi-miR166f	100.000	21	0	0	1	21	1	21	1.09e-06	39.2
mdm_miRNA54	vvi-miR166e	100.000	21	0	0	1	21	1	21	1.09e-06	39.2
mdm_miRNA54	vvi-miR166d	100.000	21	0	0	1	21	1	21	1.09e-06	39.2
mdm_miRNA54	vvi-miR166c	100.000	21	0	0	1	21	1	21	1.09e-06	39.2
mdm_miRNA54	vun-miR166d.3	100.000	21	0	0	1	21	1	21	1.09e-06	39.2
mdm_miRNA54	vun-miR166d.2	100.000	21	0	0	1	21	1	21	1.09e-06	39.2
mdm_miRNA54	vun-miR166d.1	100.000	21	0	0	1	21	1	21	1.09e-06	39.2
mdm_miRNA54	vun-miR166b.1	100.000	21	0	0	1	21	1	21	1.09e-06	39.2
mdm_miRNA54	tcc-miR166d	100.000	21	0	0	1	21	1	21	1.09e-06	39.2
mdm_miRNA54	tcc-miR166a	100.000	21	0	0	1	21	1	21	1.09e-06	39.2
mdm_miRNA54	sof-miR166	100.000	21	0	0	1	21	1	21	1.09e-06	39.2
mdm_miRNA54	smo-miR166c	100.000	21	0	0	1	21	1	21	1.09e-06	39.2
mdm_miRNA54	smo-miR166b	100.000	21	0	0	1	21	1	21	1.09e-06	39.2
mdm_miRNA54	smo-miR166a	100.000	21	0	0	1	21	1	21	1.09e-06	39.2
mdm_miRNA54	sly-miR166b	100.000	21	0	0	1	21	1	21	1.09e-06	39.2
mdm_miRNA54	sly-miR166a	100.000	21	0	0	1	21	1	21	1.09e-06	39.2
mdm_miRNA54	sit-miR60-npr	100.000	21	0	0	1	21	1	21	1.09e-06	39.2
mdm_miRNA54	sit-miR59-npr	100.000	21	0	0	1	21	1	21	1.09e-06	39.2
mdm_miRNA54	sit-miR21-2-npr	100.000	21	0	0	1	21	2	22	1.09e-06	39.2
mdm_miRNA54	sit-miR21-1-npr	100.000	21	0	0	1	21	2	22	1.09e-06	39.2
mdm_miRNA54	sit-miR166a-5	100.000	21	0	0	1	21	1	21	1.09e-06	39.2
mdm_miRNA54	sit-miR166a-4	100.000	21	0	0	1	21	1	21	1.09e-06	39.2
mdm_miRNA54	sit-miR166a-3	100.000	21	0	0	1	21	1	21	1.09e-06	39.2
mdm_miRNA54	sit-miR166a-2	100.000	21	0	0	1	21	1	21	1.09e-06	39.2
mdm_miRNA54	sit-miR166a-1	100.000	21	0	0	1	21	1	21	1.09e-06	39.2
mdm_miRNA54	rco-miR166e	100.000	21	0	0	1	21	1	21	1.09e-06	39.2
mdm_miRNA54	rco-miR166d	100.000	21	0	0	1	21	1	21	1.09e-06	39.2
mdm_miRNA54	rco-miR166c	100.000	21	0	0	1	21	1	21	1.09e-06	39.2
mdm_miRNA54	rco-miR166b	100.000	21	0	0	1	21	1	21	1.09e-06	39.2
mdm_miRNA54	rco-miR166a	100.000	21	0	0	1	21	1	21	1.09e-06	39.2
mdm_miRNA54	pvu-miR166	100.000	21	0	0	1	21	1	21	1.09e-06	39.2
mdm_miRNA54	ptc-miR166m	100.000	21	0	0	1	21	1	21	1.09e-06	39.2
mdm_miRNA54	ptc-miR166l	100.000	21	0	0	1	21	1	21	1.09e-06	39.2
mdm_miRNA54	ptc-miR166k	100.000	21	0	0	1	21	1	21	1.09e-06	39.2
mdm_miRNA54	ptc-miR166j	100.000	21	0	0	1	21	1	21	1.09e-06	39.2
mdm_miRNA54	ptc-miR166i	100.000	21	0	0	1	21	1	21	1.09e-06	39.2
mdm_miRNA54	ptc-miR166h	100.000	21	0	0	1	21	1	21	1.09e-06	39.2
# BLASTN 2.10.1+
# Query: mdm_miRNA55
# Database: /home/leclercqj/Apple/all_mature_PNRD.fadb
# 0 hits found
# BLASTN 2.10.1+
# Query: mdm_miRNA56
# Database: /home/leclercqj/Apple/all_mature_PNRD.fadb
# Fields: query acc.ver, subject acc.ver, % identity, alignment length, mismatches, gap opens, q. start, q. end, s. start, s. end, evalue, bit score
# 5 hits found
mdm_miRNA56	ptc-miR396f	100.000	21	0	0	1	21	1	21	1.23e-06	39.2
mdm_miRNA56	tcc-miR396d	100.000	20	0	0	1	20	1	20	4.29e-06	37.4
mdm_miRNA56	ptc-miR396g	100.000	20	0	0	1	20	1	20	4.29e-06	37.4
mdm_miRNA56	pab-miR396c	100.000	20	0	0	1	20	1	20	4.29e-06	37.4
mdm_miRNA56	pab-miR396b	100.000	20	0	0	1	20	1	20	4.29e-06	37.4
# BLASTN 2.10.1+
# Query: mdm_miRNA57
# Database: /home/leclercqj/Apple/all_mature_PNRD.fadb
# 0 hits found
# BLASTN 2.10.1+
# Query: mdm_miRNA58
# Database: /home/leclercqj/Apple/all_mature_PNRD.fadb
# Fields: query acc.ver, subject acc.ver, % identity, alignment length, mismatches, gap opens, q. start, q. end, s. start, s. end, evalue, bit score
# 1 hits found
mdm_miRNA58	osa-miR166e	100.000	21	0	0	1	21	1	21	1.23e-06	39.2
# BLASTN 2.10.1+
# Query: mdm_miRNA59
# Database: /home/leclercqj/Apple/all_mature_PNRD.fadb
# 0 hits found
# BLASTN 2.10.1+
# Query: mdm_miRNA60
# Database: /home/leclercqj/Apple/all_mature_PNRD.fadb
# 0 hits found
# BLASTN 2.10.1+
# Query: mdm_miRNA61
# Database: /home/leclercqj/Apple/all_mature_PNRD.fadb
# Fields: query acc.ver, subject acc.ver, % identity, alignment length, mismatches, gap opens, q. start, q. end, s. start, s. end, evalue, bit score
# 33 hits found
mdm_miRNA61	zma-miR390	100.000	21	0	0	1	21	1	21	1.23e-06	39.2
mdm_miRNA61	vvi-miR390	100.000	21	0	0	1	21	1	21	1.23e-06	39.2
mdm_miRNA61	vun-miR390a.3	100.000	21	0	0	1	21	1	21	1.23e-06	39.2
mdm_miRNA61	vun-miR390a.1	100.000	21	0	0	1	21	1	21	1.23e-06	39.2
mdm_miRNA61	tcc-miR390b	100.000	21	0	0	1	21	1	21	1.23e-06	39.2
mdm_miRNA61	tcc-miR390a	100.000	21	0	0	1	21	1	21	1.23e-06	39.2
mdm_miRNA61	sit-miR390	100.000	21	0	0	1	21	1	21	1.23e-06	39.2
mdm_miRNA61	sbi-miR390	100.000	21	0	0	1	21	1	21	1.23e-06	39.2
mdm_miRNA61	rco-miR390b	100.000	21	0	0	1	21	1	21	1.23e-06	39.2
mdm_miRNA61	rco-miR390a	100.000	21	0	0	1	21	1	21	1.23e-06	39.2
mdm_miRNA61	ptc-miR390d	100.000	21	0	0	1	21	1	21	1.23e-06	39.2
mdm_miRNA61	ptc-miR390c	100.000	21	0	0	1	21	1	21	1.23e-06	39.2
mdm_miRNA61	ptc-miR390b	100.000	21	0	0	1	21	1	21	1.23e-06	39.2
mdm_miRNA61	ptc-miR390a	100.000	21	0	0	1	21	1	21	1.23e-06	39.2
mdm_miRNA61	ppt-miR390b	100.000	21	0	0	1	21	1	21	1.23e-06	39.2
mdm_miRNA61	ppt-miR390a	100.000	21	0	0	1	21	1	21	1.23e-06	39.2
mdm_miRNA61	osa-miR390	100.000	21	0	0	1	21	1	21	1.23e-06	39.2
mdm_miRNA61	mtr-miR390	100.000	21	0	0	1	21	1	21	1.23e-06	39.2
mdm_miRNA61	gma-miR390a-5p	100.000	21	0	0	1	21	1	21	1.23e-06	39.2
mdm_miRNA61	ghr-miR390c	100.000	21	0	0	1	21	1	21	1.23e-06	39.2
mdm_miRNA61	ghr-miR390b	100.000	21	0	0	1	21	1	21	1.23e-06	39.2
mdm_miRNA61	ghr-miR390a	100.000	21	0	0	1	21	1	21	1.23e-06	39.2
mdm_miRNA61	csi-miR390	100.000	21	0	0	1	21	1	21	1.23e-06	39.2
mdm_miRNA61	bna-miR390c	100.000	21	0	0	1	21	1	21	1.23e-06	39.2
mdm_miRNA61	bna-miR390b	100.000	21	0	0	1	21	1	21	1.23e-06	39.2
mdm_miRNA61	bna-miR390a	100.000	21	0	0	1	21	1	21	1.23e-06	39.2
mdm_miRNA61	bdi-miR390b	100.000	21	0	0	1	21	1	21	1.23e-06	39.2
mdm_miRNA61	bdi-miR390	100.000	21	0	0	1	21	1	21	1.23e-06	39.2
mdm_miRNA61	ath-miR390b	100.000	21	0	0	1	21	1	21	1.23e-06	39.2
mdm_miRNA61	ath-miR390a	100.000	21	0	0	1	21	1	21	1.23e-06	39.2
mdm_miRNA61	aly-miR390b	100.000	21	0	0	1	21	1	21	1.23e-06	39.2
mdm_miRNA61	aly-miR390a	100.000	21	0	0	1	21	1	21	1.23e-06	39.2
mdm_miRNA61	ppt-miR390c	100.000	20	0	0	2	21	2	21	4.29e-06	37.4
# BLASTN 2.10.1+
# Query: mdm_miRNA62
# Database: /home/leclercqj/Apple/all_mature_PNRD.fadb
# 0 hits found
# BLASTN 2.10.1+
# Query: mdm_miRNA63
# Database: /home/leclercqj/Apple/all_mature_PNRD.fadb
# Fields: query acc.ver, subject acc.ver, % identity, alignment length, mismatches, gap opens, q. start, q. end, s. start, s. end, evalue, bit score
# 50 hits found
mdm_miRNA63	vun--miR167g	100.000	22	0	0	1	22	1	22	3.11e-07	41.0
mdm_miRNA63	sit-miR167b-3	100.000	22	0	0	1	22	1	22	3.11e-07	41.0
mdm_miRNA63	sit-miR167b-2	100.000	22	0	0	1	22	1	22	3.11e-07	41.0
mdm_miRNA63	sit-miR167b-1	100.000	22	0	0	1	22	1	22	3.11e-07	41.0
mdm_miRNA63	gma-miR167g	100.000	22	0	0	1	22	1	22	3.11e-07	41.0
mdm_miRNA63	ctr-miR167	100.000	22	0	0	1	22	1	22	3.11e-07	41.0
mdm_miRNA63	ccl-miR167b	100.000	22	0	0	1	22	1	22	3.11e-07	41.0
mdm_miRNA63	ccl-miR167a	100.000	22	0	0	1	22	1	22	3.11e-07	41.0
mdm_miRNA63	bdi-miR167d	100.000	22	0	0	1	22	1	22	3.11e-07	41.0
mdm_miRNA63	bdi-miR167c	100.000	22	0	0	1	22	1	22	3.11e-07	41.0
mdm_miRNA63	zma-miR167m	100.000	21	0	0	1	21	1	21	1.09e-06	39.2
mdm_miRNA63	zma-miR167l	100.000	21	0	0	1	21	1	21	1.09e-06	39.2
mdm_miRNA63	zma-miR167k	100.000	21	0	0	1	21	1	21	1.09e-06	39.2
mdm_miRNA63	zma-miR167j	100.000	21	0	0	1	21	1	21	1.09e-06	39.2
mdm_miRNA63	zma-miR167i	100.000	21	0	0	1	21	1	21	1.09e-06	39.2
mdm_miRNA63	zma-miR167h	100.000	21	0	0	1	21	1	21	1.09e-06	39.2
mdm_miRNA63	zma-miR167g	100.000	21	0	0	1	21	1	21	1.09e-06	39.2
mdm_miRNA63	zma-miR167f	100.000	21	0	0	1	21	1	21	1.09e-06	39.2
mdm_miRNA63	zma-miR167e	100.000	21	0	0	1	21	1	21	1.09e-06	39.2
mdm_miRNA63	vvi-miR167a	100.000	21	0	0	1	21	1	21	1.09e-06	39.2
mdm_miRNA63	ssp-miR167b	100.000	21	0	0	1	21	1	21	1.09e-06	39.2
mdm_miRNA63	sof-miR167b	100.000	21	0	0	1	21	1	21	1.09e-06	39.2
mdm_miRNA63	sof-miR167a	100.000	21	0	0	1	21	1	21	1.09e-06	39.2
mdm_miRNA63	sit-miR167d-4	100.000	21	0	0	1	21	1	21	1.09e-06	39.2
mdm_miRNA63	sit-miR167d-3	100.000	21	0	0	1	21	1	21	1.09e-06	39.2
mdm_miRNA63	sit-miR167d-2	100.000	21	0	0	1	21	1	21	1.09e-06	39.2
mdm_miRNA63	sit-miR167d-1	100.000	21	0	0	1	21	1	21	1.09e-06	39.2
mdm_miRNA63	sit-miR167c	100.000	21	0	0	1	21	1	21	1.09e-06	39.2
mdm_miRNA63	sbi-miR167h	100.000	21	0	0	1	21	1	21	1.09e-06	39.2
mdm_miRNA63	sbi-miR167g	100.000	21	0	0	1	21	1	21	1.09e-06	39.2
mdm_miRNA63	sbi-miR167f	100.000	21	0	0	1	21	1	21	1.09e-06	39.2
mdm_miRNA63	sbi-miR167e	100.000	21	0	0	1	21	1	21	1.09e-06	39.2
mdm_miRNA63	sbi-miR167d	100.000	21	0	0	1	21	1	21	1.09e-06	39.2
mdm_miRNA63	sbi-miR167c	100.000	21	0	0	1	21	1	21	1.09e-06	39.2
mdm_miRNA63	rco-miR167c	100.000	21	0	0	1	21	1	21	1.09e-06	39.2
mdm_miRNA63	pts-miR167	100.000	21	0	0	1	21	1	21	1.09e-06	39.2
mdm_miRNA63	ptc-miR167e	100.000	21	0	0	1	21	1	21	1.09e-06	39.2
mdm_miRNA63	ppl-miR167b	100.000	21	0	0	1	21	1	21	1.09e-06	39.2
mdm_miRNA63	osa-miR167n	100.000	21	0	0	1	21	1	21	1.09e-06	39.2
mdm_miRNA63	osa-miR167m	100.000	21	0	0	1	21	1	21	1.09e-06	39.2
mdm_miRNA63	osa-miR167j	100.000	21	0	0	1	21	1	21	1.09e-06	39.2
mdm_miRNA63	osa-miR167i	100.000	21	0	0	1	21	1	21	1.09e-06	39.2
mdm_miRNA63	osa-miR167h	100.000	21	0	0	1	21	1	21	1.09e-06	39.2
mdm_miRNA63	osa-miR167g	100.000	21	0	0	1	21	1	21	1.09e-06	39.2
mdm_miRNA63	osa-miR167f	100.000	21	0	0	1	21	1	21	1.09e-06	39.2
mdm_miRNA63	osa-miR167e	100.000	21	0	0	1	21	1	21	1.09e-06	39.2
mdm_miRNA63	osa-miR167d	100.000	21	0	0	1	21	1	21	1.09e-06	39.2
mdm_miRNA63	lja-miR167	100.000	21	0	0	1	21	1	21	1.09e-06	39.2
mdm_miRNA63	ini-miR167	100.000	21	0	0	1	21	1	21	1.09e-06	39.2
mdm_miRNA63	gso-miR167a	100.000	21	0	0	1	21	1	21	1.09e-06	39.2
# BLASTN 2.10.1+
# Query: mdm_miRNA64
# Database: /home/leclercqj/Apple/all_mature_PNRD.fadb
# 0 hits found
# BLASTN 2.10.1+
# Query: mdm_miRNA65
# Database: /home/leclercqj/Apple/all_mature_PNRD.fadb
# 0 hits found
# BLASTN 2.10.1+
# Query: mdm_miRNA66
# Database: /home/leclercqj/Apple/all_mature_PNRD.fadb
# 0 hits found
# BLASTN 2.10.1+
# Query: mdm_miRNA67
# Database: /home/leclercqj/Apple/all_mature_PNRD.fadb
# 0 hits found
# BLASTN 2.10.1+
# Query: mdm_miRNA68
# Database: /home/leclercqj/Apple/all_mature_PNRD.fadb
# 0 hits found
# BLASTN 2.10.1+
# Query: mdm_miRNA69
# Database: /home/leclercqj/Apple/all_mature_PNRD.fadb
# 0 hits found
# BLASTN 2.10.1+
# Query: mdm_miRNA70
# Database: /home/leclercqj/Apple/all_mature_PNRD.fadb
# 0 hits found
# BLASTN 2.10.1+
# Query: mdm_miRNA71
# Database: /home/leclercqj/Apple/all_mature_PNRD.fadb
# Fields: query acc.ver, subject acc.ver, % identity, alignment length, mismatches, gap opens, q. start, q. end, s. start, s. end, evalue, bit score
# 1 hits found
mdm_miRNA71	aly-miR396a*	100.000	21	0	0	1	21	1	21	1.23e-06	39.2
# BLASTN 2.10.1+
# Query: mdm_miRNA72
# Database: /home/leclercqj/Apple/all_mature_PNRD.fadb
# 0 hits found
# BLASTN 2.10.1+
# Query: mdm_miRNA73
# Database: /home/leclercqj/Apple/all_mature_PNRD.fadb
# 0 hits found
# BLASTN 2.10.1+
# Query: mdm_miRNA74
# Database: /home/leclercqj/Apple/all_mature_PNRD.fadb
# 0 hits found
# BLASTN 2.10.1+
# Query: mdm_miRNA75
# Database: /home/leclercqj/Apple/all_mature_PNRD.fadb
# Fields: query acc.ver, subject acc.ver, % identity, alignment length, mismatches, gap opens, q. start, q. end, s. start, s. end, evalue, bit score
# 50 hits found
mdm_miRNA75	sit-miR59-npr	100.000	22	0	0	1	22	1	22	3.11e-07	41.0
mdm_miRNA75	ctr-miR166	100.000	22	0	0	1	22	1	22	3.11e-07	41.0
mdm_miRNA75	csi-miR166a	100.000	22	0	0	1	22	1	22	3.11e-07	41.0
mdm_miRNA75	zma-miR166t	100.000	21	0	0	1	21	1	21	1.09e-06	39.2
mdm_miRNA75	zma-miR166s	100.000	21	0	0	1	21	1	21	1.09e-06	39.2
mdm_miRNA75	zma-miR166r	100.000	21	0	0	1	21	1	21	1.09e-06	39.2
mdm_miRNA75	zma-miR166q	100.000	21	0	0	1	21	1	21	1.09e-06	39.2
mdm_miRNA75	zma-miR166p	100.000	21	0	0	1	21	1	21	1.09e-06	39.2
mdm_miRNA75	zma-miR166o	100.000	21	0	0	1	21	1	21	1.09e-06	39.2
mdm_miRNA75	zma-miR166n	100.000	21	0	0	1	21	1	21	1.09e-06	39.2
mdm_miRNA75	zma-miR166a	100.000	21	0	0	1	21	1	21	1.09e-06	39.2
mdm_miRNA75	vvi-miR166h	100.000	21	0	0	1	21	1	21	1.09e-06	39.2
mdm_miRNA75	vvi-miR166g	100.000	21	0	0	1	21	1	21	1.09e-06	39.2
mdm_miRNA75	vvi-miR166f	100.000	21	0	0	1	21	1	21	1.09e-06	39.2
mdm_miRNA75	vvi-miR166e	100.000	21	0	0	1	21	1	21	1.09e-06	39.2
mdm_miRNA75	vvi-miR166d	100.000	21	0	0	1	21	1	21	1.09e-06	39.2
mdm_miRNA75	vvi-miR166c	100.000	21	0	0	1	21	1	21	1.09e-06	39.2
mdm_miRNA75	vun-miR166d.3	100.000	21	0	0	1	21	1	21	1.09e-06	39.2
mdm_miRNA75	vun-miR166d.2	100.000	21	0	0	1	21	1	21	1.09e-06	39.2
mdm_miRNA75	vun-miR166d.1	100.000	21	0	0	1	21	1	21	1.09e-06	39.2
mdm_miRNA75	vun-miR166b.1	100.000	21	0	0	1	21	1	21	1.09e-06	39.2
mdm_miRNA75	tcc-miR166d	100.000	21	0	0	1	21	1	21	1.09e-06	39.2
mdm_miRNA75	tcc-miR166a	100.000	21	0	0	1	21	1	21	1.09e-06	39.2
mdm_miRNA75	sof-miR166	100.000	21	0	0	1	21	1	21	1.09e-06	39.2
mdm_miRNA75	smo-miR166c	100.000	21	0	0	1	21	1	21	1.09e-06	39.2
mdm_miRNA75	smo-miR166b	100.000	21	0	0	1	21	1	21	1.09e-06	39.2
mdm_miRNA75	smo-miR166a	100.000	21	0	0	1	21	1	21	1.09e-06	39.2
mdm_miRNA75	sly-miR166b	100.000	21	0	0	1	21	1	21	1.09e-06	39.2
mdm_miRNA75	sly-miR166a	100.000	21	0	0	1	21	1	21	1.09e-06	39.2
mdm_miRNA75	sit-miR60-npr	100.000	21	0	0	1	21	1	21	1.09e-06	39.2
mdm_miRNA75	sit-miR58-3-npr	100.000	21	0	0	1	21	1	21	1.09e-06	39.2
mdm_miRNA75	sit-miR58-2-npr	100.000	21	0	0	1	21	1	21	1.09e-06	39.2
mdm_miRNA75	sit-miR58-1-npr	100.000	21	0	0	1	21	1	21	1.09e-06	39.2
mdm_miRNA75	sit-miR21-2-npr	100.000	21	0	0	1	21	2	22	1.09e-06	39.2
mdm_miRNA75	sit-miR21-1-npr	100.000	21	0	0	1	21	2	22	1.09e-06	39.2
mdm_miRNA75	sit-miR166a-5	100.000	21	0	0	1	21	1	21	1.09e-06	39.2
mdm_miRNA75	sit-miR166a-4	100.000	21	0	0	1	21	1	21	1.09e-06	39.2
mdm_miRNA75	sit-miR166a-3	100.000	21	0	0	1	21	1	21	1.09e-06	39.2
mdm_miRNA75	sit-miR166a-2	100.000	21	0	0	1	21	1	21	1.09e-06	39.2
mdm_miRNA75	sit-miR166a-1	100.000	21	0	0	1	21	1	21	1.09e-06	39.2
mdm_miRNA75	rco-miR166e	100.000	21	0	0	1	21	1	21	1.09e-06	39.2
mdm_miRNA75	rco-miR166d	100.000	21	0	0	1	21	1	21	1.09e-06	39.2
mdm_miRNA75	rco-miR166c	100.000	21	0	0	1	21	1	21	1.09e-06	39.2
mdm_miRNA75	rco-miR166b	100.000	21	0	0	1	21	1	21	1.09e-06	39.2
mdm_miRNA75	rco-miR166a	100.000	21	0	0	1	21	1	21	1.09e-06	39.2
mdm_miRNA75	pvu-miR166	100.000	21	0	0	1	21	1	21	1.09e-06	39.2
mdm_miRNA75	ptc-miR166m	100.000	21	0	0	1	21	1	21	1.09e-06	39.2
mdm_miRNA75	ptc-miR166l	100.000	21	0	0	1	21	1	21	1.09e-06	39.2
mdm_miRNA75	ptc-miR166k	100.000	21	0	0	1	21	1	21	1.09e-06	39.2
mdm_miRNA75	ptc-miR166j	100.000	21	0	0	1	21	1	21	1.09e-06	39.2
# BLASTN 2.10.1+
# Query: mdm_miRNA76
# Database: /home/leclercqj/Apple/all_mature_PNRD.fadb
# 0 hits found
# BLASTN 2.10.1+
# Query: mdm_miRNA77
# Database: /home/leclercqj/Apple/all_mature_PNRD.fadb
# Fields: query acc.ver, subject acc.ver, % identity, alignment length, mismatches, gap opens, q. start, q. end, s. start, s. end, evalue, bit score
# 16 hits found
mdm_miRNA77	zma-miR159g	100.000	21	0	0	1	21	1	21	1.23e-06	39.2
mdm_miRNA77	zma-miR159f	100.000	21	0	0	1	21	1	21	1.23e-06	39.2
mdm_miRNA77	zma-miR159d	100.000	21	0	0	1	21	1	21	1.23e-06	39.2
mdm_miRNA77	zma-miR159c	100.000	21	0	0	1	21	1	21	1.23e-06	39.2
mdm_miRNA77	sof-miR159c	100.000	21	0	0	1	21	1	21	1.23e-06	39.2
mdm_miRNA77	sbi-miR159b	100.000	21	0	0	1	21	1	21	1.23e-06	39.2
mdm_miRNA77	ptc-miR159d	100.000	21	0	0	1	21	1	21	1.23e-06	39.2
mdm_miRNA77	zma-miR319m	100.000	20	0	0	2	21	1	20	4.29e-06	37.4
mdm_miRNA77	sof-miR319b	100.000	20	0	0	2	21	1	20	4.29e-06	37.4
mdm_miRNA77	smo-miR159	100.000	20	0	0	1	20	1	20	4.29e-06	37.4
mdm_miRNA77	sit-miR110-npr	100.000	20	0	0	1	20	1	20	4.29e-06	37.4
mdm_miRNA77	pta-miR159c	100.000	20	0	0	1	20	1	20	4.29e-06	37.4
mdm_miRNA77	psi-miR159	100.000	20	0	0	1	20	1	20	4.29e-06	37.4
mdm_miRNA77	osa-miR159e	100.000	20	0	0	2	21	2	21	4.29e-06	37.4
mdm_miRNA77	ath-miR159c	100.000	20	0	0	2	21	2	21	4.29e-06	37.4
mdm_miRNA77	aly-miR159c	100.000	20	0	0	2	21	2	21	4.29e-06	37.4
# BLASTN 2.10.1+
# Query: mdm_miRNA78
# Database: /home/leclercqj/Apple/all_mature_PNRD.fadb
# 0 hits found
# BLASTN 2.10.1+
# Query: mdm_miRNA79
# Database: /home/leclercqj/Apple/all_mature_PNRD.fadb
# Fields: query acc.ver, subject acc.ver, % identity, alignment length, mismatches, gap opens, q. start, q. end, s. start, s. end, evalue, bit score
# 50 hits found
mdm_miRNA79	sit-miR156d-2	100.000	21	0	0	1	21	1	21	1.23e-06	39.2
mdm_miRNA79	sit-miR156d-1	100.000	21	0	0	1	21	1	21	1.23e-06	39.2
mdm_miRNA79	sbi-miR157	100.000	21	0	0	1	21	1	21	1.23e-06	39.2
mdm_miRNA79	zma-miR156o	100.000	20	0	0	2	21	1	20	4.29e-06	37.4
mdm_miRNA79	zma-miR156n	100.000	20	0	0	2	21	1	20	4.29e-06	37.4
mdm_miRNA79	zma-miR156m	100.000	20	0	0	2	21	1	20	4.29e-06	37.4
mdm_miRNA79	zma-miR156l	100.000	20	0	0	2	21	1	20	4.29e-06	37.4
mdm_miRNA79	zma-miR156i	100.000	20	0	0	2	21	1	20	4.29e-06	37.4
mdm_miRNA79	zma-miR156h	100.000	20	0	0	2	21	1	20	4.29e-06	37.4
mdm_miRNA79	zma-miR156g	100.000	20	0	0	2	21	1	20	4.29e-06	37.4
mdm_miRNA79	zma-miR156f	100.000	20	0	0	2	21	1	20	4.29e-06	37.4
mdm_miRNA79	zma-miR156e	100.000	20	0	0	2	21	1	20	4.29e-06	37.4
mdm_miRNA79	zma-miR156d	100.000	20	0	0	2	21	1	20	4.29e-06	37.4
mdm_miRNA79	zma-miR156c	100.000	20	0	0	2	21	1	20	4.29e-06	37.4
mdm_miRNA79	zma-miR156b	100.000	20	0	0	2	21	1	20	4.29e-06	37.4
mdm_miRNA79	zma-miR156a	100.000	20	0	0	2	21	1	20	4.29e-06	37.4
mdm_miRNA79	vvi-miR156d	100.000	20	0	0	2	21	1	20	4.29e-06	37.4
mdm_miRNA79	vvi-miR156c	100.000	20	0	0	2	21	1	20	4.29e-06	37.4
mdm_miRNA79	vvi-miR156b	100.000	20	0	0	2	21	1	20	4.29e-06	37.4
mdm_miRNA79	vun-miR156a.2	100.000	20	0	0	2	21	1	20	4.29e-06	37.4
mdm_miRNA79	vun-miR156a.1	100.000	20	0	0	2	21	1	20	4.29e-06	37.4
mdm_miRNA79	tre-miR156	100.000	20	0	0	2	21	1	20	4.29e-06	37.4
mdm_miRNA79	tcc-miR156g	100.000	20	0	0	2	21	1	20	4.29e-06	37.4
mdm_miRNA79	tcc-miR156d	100.000	20	0	0	2	21	1	20	4.29e-06	37.4
mdm_miRNA79	tcc-miR156c	100.000	20	0	0	2	21	1	20	4.29e-06	37.4
mdm_miRNA79	tcc-miR156b	100.000	20	0	0	2	21	1	20	4.29e-06	37.4
mdm_miRNA79	stu-miR156a	100.000	20	0	0	2	21	1	20	4.29e-06	37.4
mdm_miRNA79	ssp-miR156	100.000	20	0	0	2	21	1	20	4.29e-06	37.4
mdm_miRNA79	sof-miR156	100.000	20	0	0	2	21	1	20	4.29e-06	37.4
mdm_miRNA79	sit-miR113-2-npr	100.000	20	0	0	2	21	2	21	4.29e-06	37.4
mdm_miRNA79	sit-miR113-1-npr	100.000	20	0	0	2	21	2	21	4.29e-06	37.4
mdm_miRNA79	sit-miR156b-6	100.000	20	0	0	2	21	1	20	4.29e-06	37.4
mdm_miRNA79	sit-miR156b-5	100.000	20	0	0	2	21	1	20	4.29e-06	37.4
mdm_miRNA79	sit-miR156b-4	100.000	20	0	0	2	21	1	20	4.29e-06	37.4
mdm_miRNA79	sit-miR156b-3	100.000	20	0	0	2	21	1	20	4.29e-06	37.4
mdm_miRNA79	sit-miR156b-2	100.000	20	0	0	2	21	1	20	4.29e-06	37.4
mdm_miRNA79	sit-miR156b-1	100.000	20	0	0	2	21	1	20	4.29e-06	37.4
mdm_miRNA79	sit-miR156a-5	100.000	20	0	0	2	21	1	20	4.29e-06	37.4
mdm_miRNA79	sit-miR156a-4	100.000	20	0	0	2	21	1	20	4.29e-06	37.4
mdm_miRNA79	sit-miR156a-3	100.000	20	0	0	2	21	1	20	4.29e-06	37.4
mdm_miRNA79	sit-miR156a-2	100.000	20	0	0	2	21	1	20	4.29e-06	37.4
mdm_miRNA79	sit-miR156a-1	100.000	20	0	0	2	21	1	20	4.29e-06	37.4
mdm_miRNA79	sbi-miR156i	100.000	20	0	0	2	21	1	20	4.29e-06	37.4
mdm_miRNA79	sbi-miR156h	100.000	20	0	0	2	21	1	20	4.29e-06	37.4
mdm_miRNA79	sbi-miR156g	100.000	20	0	0	2	21	1	20	4.29e-06	37.4
mdm_miRNA79	sbi-miR156f	100.000	20	0	0	2	21	1	20	4.29e-06	37.4
mdm_miRNA79	sbi-miR156c	100.000	20	0	0	2	21	1	20	4.29e-06	37.4
mdm_miRNA79	sbi-miR156b	100.000	20	0	0	2	21	1	20	4.29e-06	37.4
mdm_miRNA79	sbi-miR156a	100.000	20	0	0	2	21	1	20	4.29e-06	37.4
mdm_miRNA79	rco-miR156d	100.000	20	0	0	2	21	1	20	4.29e-06	37.4
# BLASTN 2.10.1+
# Query: mdm_miRNA80
# Database: /home/leclercqj/Apple/all_mature_PNRD.fadb
# 0 hits found
# BLASTN 2.10.1+
# Query: mdm_miRNA81
# Database: /home/leclercqj/Apple/all_mature_PNRD.fadb
# 0 hits found
# BLASTN 2.10.1+
# Query: mdm_miRNA82
# Database: /home/leclercqj/Apple/all_mature_PNRD.fadb
# 0 hits found
# BLASTN 2.10.1+
# Query: mdm_miRNA83
# Database: /home/leclercqj/Apple/all_mature_PNRD.fadb
# Fields: query acc.ver, subject acc.ver, % identity, alignment length, mismatches, gap opens, q. start, q. end, s. start, s. end, evalue, bit score
# 47 hits found
mdm_miRNA83	zma-miR171n	100.000	21	0	0	1	21	1	21	1.23e-06	39.2
mdm_miRNA83	zma-miR170p	100.000	21	0	0	1	21	1	21	1.23e-06	39.2
mdm_miRNA83	vvi-miR171e	100.000	21	0	0	1	21	1	21	1.23e-06	39.2
mdm_miRNA83	tcc-miR171a	100.000	21	0	0	1	21	1	21	1.23e-06	39.2
mdm_miRNA83	stu-miR171	100.000	21	0	0	1	21	1	21	1.23e-06	39.2
mdm_miRNA83	stu-miR170	100.000	21	0	0	1	21	1	21	1.23e-06	39.2
mdm_miRNA83	sit-miR171a-2	100.000	21	0	0	1	21	1	21	1.23e-06	39.2
mdm_miRNA83	sit-miR171a-1	100.000	21	0	0	1	21	1	21	1.23e-06	39.2
mdm_miRNA83	sbi-miR171j	100.000	21	0	0	1	21	1	21	1.23e-06	39.2
mdm_miRNA83	sbi-miR171g	100.000	21	0	0	1	21	1	21	1.23e-06	39.2
mdm_miRNA83	sbi-miR170	100.000	21	0	0	1	21	1	21	1.23e-06	39.2
mdm_miRNA83	ppd-miR170	100.000	21	0	0	1	21	1	21	1.23e-06	39.2
mdm_miRNA83	osa-miR171a	100.000	21	0	0	1	21	1	21	1.23e-06	39.2
mdm_miRNA83	gra-miR171	100.000	21	0	0	1	21	1	21	1.23e-06	39.2
mdm_miRNA83	gma-miR171m	100.000	21	0	0	1	21	1	21	1.23e-06	39.2
mdm_miRNA83	gcl-miR171	100.000	21	0	0	1	21	1	21	1.23e-06	39.2
mdm_miRNA83	ccl-miR171	100.000	21	0	0	1	21	1	21	1.23e-06	39.2
mdm_miRNA83	bra-miR171e	100.000	21	0	0	1	21	1	21	1.23e-06	39.2
mdm_miRNA83	bna-miR171g	100.000	21	0	0	1	21	1	21	1.23e-06	39.2
mdm_miRNA83	bna-miR171f	100.000	21	0	0	1	21	1	21	1.23e-06	39.2
mdm_miRNA83	bdi-miR171a	100.000	21	0	0	1	21	1	21	1.23e-06	39.2
mdm_miRNA83	ath-miR171o	100.000	21	0	0	1	21	1	21	1.23e-06	39.2
mdm_miRNA83	ath-miR171n	100.000	21	0	0	1	21	1	21	1.23e-06	39.2
mdm_miRNA83	ath-miR171m	100.000	21	0	0	1	21	1	21	1.23e-06	39.2
mdm_miRNA83	ath-miR171a	100.000	21	0	0	1	21	1	21	1.23e-06	39.2
mdm_miRNA83	ath-miR170n	100.000	21	0	0	1	21	1	21	1.23e-06	39.2
mdm_miRNA83	ath-miR170m	100.000	21	0	0	1	21	1	21	1.23e-06	39.2
mdm_miRNA83	aly-miR171a	100.000	21	0	0	1	21	1	21	1.23e-06	39.2
mdm_miRNA83	ace-miR171c	100.000	21	0	0	1	21	1	21	1.23e-06	39.2
mdm_miRNA83	ace-miR171b	100.000	21	0	0	1	21	1	21	1.23e-06	39.2
mdm_miRNA83	ace-miR171a	100.000	21	0	0	1	21	1	21	1.23e-06	39.2
mdm_miRNA83	ace-miR170d	100.000	21	0	0	1	21	1	21	1.23e-06	39.2
mdm_miRNA83	ace-miR170c	100.000	21	0	0	1	21	1	21	1.23e-06	39.2
mdm_miRNA83	ace-miR170b	100.000	21	0	0	1	21	1	21	1.23e-06	39.2
mdm_miRNA83	ace-miR170a	100.000	21	0	0	1	21	1	21	1.23e-06	39.2
mdm_miRNA83	zma-miR171a	100.000	20	0	0	1	20	1	20	4.29e-06	37.4
mdm_miRNA83	zel-miR171	100.000	20	0	0	2	21	2	21	4.29e-06	37.4
mdm_miRNA83	tcc-miR171c	100.000	20	0	0	2	21	2	21	4.29e-06	37.4
mdm_miRNA83	tcc-miR171b	100.000	20	0	0	2	21	2	21	4.29e-06	37.4
mdm_miRNA83	rco-miR171g	100.000	20	0	0	2	21	2	21	4.29e-06	37.4
mdm_miRNA83	ptc-miRf10666-akr	100.000	20	0	0	2	21	1	20	4.29e-06	37.4
mdm_miRNA83	ptc-miRf10509-akr	100.000	20	0	0	2	21	1	20	4.29e-06	37.4
mdm_miRNA83	ptc-miR171k	100.000	20	0	0	2	21	2	21	4.29e-06	37.4
mdm_miRNA83	ptc-miR171d	100.000	20	0	0	2	21	2	21	4.29e-06	37.4
mdm_miRNA83	ptc-miR171c	100.000	20	0	0	2	21	2	21	4.29e-06	37.4
mdm_miRNA83	mtr-miR171e	100.000	20	0	0	2	21	2	21	4.29e-06	37.4
mdm_miRNA83	ghr-miR171	100.000	20	0	0	2	21	2	21	4.29e-06	37.4
# BLASTN 2.10.1+
# Query: mdm_miRNA84
# Database: /home/leclercqj/Apple/all_mature_PNRD.fadb
# 0 hits found
# BLASTN 2.10.1+
# Query: mdm_miRNA85
# Database: /home/leclercqj/Apple/all_mature_PNRD.fadb
# Fields: query acc.ver, subject acc.ver, % identity, alignment length, mismatches, gap opens, q. start, q. end, s. start, s. end, evalue, bit score
# 1 hits found
mdm_miRNA85	vun-miR396b*	100.000	20	0	0	1	20	2	21	3.75e-06	37.4
# BLASTN 2.10.1+
# Query: mdm_miRNA86
# Database: /home/leclercqj/Apple/all_mature_PNRD.fadb
# Fields: query acc.ver, subject acc.ver, % identity, alignment length, mismatches, gap opens, q. start, q. end, s. start, s. end, evalue, bit score
# 1 hits found
mdm_miRNA86	ptc-miRf10576-akr	100.000	20	0	0	1	20	2	21	3.75e-06	37.4
# BLASTN 2.10.1+
# Query: mdm_miRNA87
# Database: /home/leclercqj/Apple/all_mature_PNRD.fadb
# 0 hits found
# BLASTN 2.10.1+
# Query: mdm_miRNA88
# Database: /home/leclercqj/Apple/all_mature_PNRD.fadb
# 0 hits found
# BLASTN 2.10.1+
# Query: mdm_miRNA89
# Database: /home/leclercqj/Apple/all_mature_PNRD.fadb
# 0 hits found
# BLASTN 2.10.1+
# Query: mdm_miRNA90
# Database: /home/leclercqj/Apple/all_mature_PNRD.fadb
# Fields: query acc.ver, subject acc.ver, % identity, alignment length, mismatches, gap opens, q. start, q. end, s. start, s. end, evalue, bit score
# 9 hits found
mdm_miRNA90	vun-miR166c*.4	100.000	21	0	0	1	21	1	21	1.23e-06	39.2
mdm_miRNA90	vun-miR166c*.3	100.000	21	0	0	1	21	1	21	1.23e-06	39.2
mdm_miRNA90	vun-miR166c*.2	100.000	21	0	0	1	21	1	21	1.23e-06	39.2
mdm_miRNA90	vun-miR166c*.1	100.000	21	0	0	1	21	1	21	1.23e-06	39.2
mdm_miRNA90	csi-miR166e*	100.000	21	0	0	1	21	1	21	1.23e-06	39.2
mdm_miRNA90	aly-miR166d*	100.000	21	0	0	1	21	1	21	1.23e-06	39.2
mdm_miRNA90	aly-miR166c*	100.000	21	0	0	1	21	1	21	1.23e-06	39.2
mdm_miRNA90	aly-miR166a*	100.000	21	0	0	1	21	1	21	1.23e-06	39.2
mdm_miRNA90	ptc-miRf10467-akr	100.000	20	0	0	1	20	20	1	4.29e-06	37.4
# BLASTN 2.10.1+
# Query: mdm_miRNA91
# Database: /home/leclercqj/Apple/all_mature_PNRD.fadb
# Fields: query acc.ver, subject acc.ver, % identity, alignment length, mismatches, gap opens, q. start, q. end, s. start, s. end, evalue, bit score
# 25 hits found
mdm_miRNA91	vun-miR394a.3	100.000	21	0	0	1	21	1	21	1.23e-06	39.2
mdm_miRNA91	vun-miR394a.1	100.000	21	0	0	1	21	1	21	1.23e-06	39.2
mdm_miRNA91	zma-miR394b	100.000	20	0	0	2	21	1	20	4.29e-06	37.4
mdm_miRNA91	zma-miR394a	100.000	20	0	0	2	21	1	20	4.29e-06	37.4
mdm_miRNA91	vvi-miR394c	100.000	20	0	0	2	21	1	20	4.29e-06	37.4
mdm_miRNA91	vvi-miR394b	100.000	20	0	0	2	21	1	20	4.29e-06	37.4
mdm_miRNA91	vvi-miR394a	100.000	20	0	0	2	21	1	20	4.29e-06	37.4
mdm_miRNA91	vun-miR394a.4	100.000	20	0	0	2	21	1	20	4.29e-06	37.4
mdm_miRNA91	vun-miR394a.2	100.000	20	0	0	2	21	1	20	4.29e-06	37.4
mdm_miRNA91	tcc-miR394b	100.000	20	0	0	2	21	1	20	4.29e-06	37.4
mdm_miRNA91	tcc-miR394a	100.000	20	0	0	2	21	1	20	4.29e-06	37.4
mdm_miRNA91	sit-miR394	100.000	20	0	0	2	21	1	20	4.29e-06	37.4
mdm_miRNA91	sbi-miR394b	100.000	20	0	0	2	21	1	20	4.29e-06	37.4
mdm_miRNA91	sbi-miR394a	100.000	20	0	0	2	21	1	20	4.29e-06	37.4
mdm_miRNA91	ptc-miR394b-5p	100.000	20	0	0	2	21	1	20	4.29e-06	37.4
mdm_miRNA91	ptc-miR394a-5p	100.000	20	0	0	2	21	1	20	4.29e-06	37.4
mdm_miRNA91	osa-miR394	100.000	20	0	0	2	21	1	20	4.29e-06	37.4
mdm_miRNA91	ghr-miR394	100.000	20	0	0	2	21	1	20	4.29e-06	37.4
mdm_miRNA91	csi-miR394	100.000	20	0	0	2	21	1	20	4.29e-06	37.4
mdm_miRNA91	bdi-miR394	100.000	20	0	0	2	21	1	20	4.29e-06	37.4
mdm_miRNA91	ath-miR394b	100.000	20	0	0	2	21	1	20	4.29e-06	37.4
mdm_miRNA91	ath-miR394a	100.000	20	0	0	2	21	1	20	4.29e-06	37.4
mdm_miRNA91	aly-miR394b	100.000	20	0	0	2	21	1	20	4.29e-06	37.4
mdm_miRNA91	aly-miR394a	100.000	20	0	0	2	21	1	20	4.29e-06	37.4
mdm_miRNA91	ahy-miR394	100.000	20	0	0	2	21	1	20	4.29e-06	37.4
# BLASTN 2.10.1+
# Query: mdm_miRNA92
# Database: /home/leclercqj/Apple/all_mature_PNRD.fadb
# 0 hits found
# BLASTN 2.10.1+
# Query: mdm_miRNA93
# Database: /home/leclercqj/Apple/all_mature_PNRD.fadb
# Fields: query acc.ver, subject acc.ver, % identity, alignment length, mismatches, gap opens, q. start, q. end, s. start, s. end, evalue, bit score
# 21 hits found
mdm_miRNA93	vvi-miR168	100.000	21	0	0	1	21	1	21	1.23e-06	39.2
mdm_miRNA93	vun-miR168b	100.000	21	0	0	1	21	1	21	1.23e-06	39.2
mdm_miRNA93	tcc-miR168	100.000	21	0	0	1	21	1	21	1.23e-06	39.2
mdm_miRNA93	rco-miR168	100.000	21	0	0	1	21	1	21	1.23e-06	39.2
mdm_miRNA93	pts-miR168b	100.000	21	0	0	1	21	1	21	1.23e-06	39.2
mdm_miRNA93	pts-miR168a	100.000	21	0	0	1	21	1	21	1.23e-06	39.2
mdm_miRNA93	ptr-miR168	100.000	21	0	0	1	21	1	21	1.23e-06	39.2
mdm_miRNA93	ptc-miR168b	100.000	21	0	0	1	21	1	21	1.23e-06	39.2
mdm_miRNA93	ptc-miR168a	100.000	21	0	0	1	21	1	21	1.23e-06	39.2
mdm_miRNA93	hte-miR168	100.000	21	0	0	1	21	1	21	1.23e-06	39.2
mdm_miRNA93	gma-miR168	100.000	21	0	0	1	21	1	21	1.23e-06	39.2
mdm_miRNA93	crt-miR168	100.000	21	0	0	1	21	1	21	1.23e-06	39.2
mdm_miRNA93	ccl-miR168	100.000	21	0	0	1	21	1	21	1.23e-06	39.2
mdm_miRNA93	bna-miR168	100.000	21	0	0	1	21	1	21	1.23e-06	39.2
mdm_miRNA93	ath-miR168m	100.000	21	0	0	1	21	1	21	1.23e-06	39.2
mdm_miRNA93	ath-miR168b	100.000	21	0	0	1	21	1	21	1.23e-06	39.2
mdm_miRNA93	ath-miR168a	100.000	21	0	0	1	21	1	21	1.23e-06	39.2
mdm_miRNA93	aly-miR168b	100.000	21	0	0	1	21	1	21	1.23e-06	39.2
mdm_miRNA93	aly-miR168a	100.000	21	0	0	1	21	1	21	1.23e-06	39.2
mdm_miRNA93	stu-miR168	100.000	20	0	0	1	20	1	20	4.29e-06	37.4
mdm_miRNA93	sly-miR168	100.000	20	0	0	1	20	1	20	4.29e-06	37.4
# BLASTN 2.10.1+
# Query: mdm_miRNA94
# Database: /home/leclercqj/Apple/all_mature_PNRD.fadb
# 0 hits found
# BLASTN 2.10.1+
# Query: mdm_miRNA95
# Database: /home/leclercqj/Apple/all_mature_PNRD.fadb
# 0 hits found
# BLASTN 2.10.1+
# Query: mdm_miRNA96
# Database: /home/leclercqj/Apple/all_mature_PNRD.fadb
# 0 hits found
# BLASTN 2.10.1+
# Query: mdm_miRNA97
# Database: /home/leclercqj/Apple/all_mature_PNRD.fadb
# 0 hits found
# BLASTN 2.10.1+
# Query: mdm_miRNA98
# Database: /home/leclercqj/Apple/all_mature_PNRD.fadb
# 0 hits found
# BLASTN 2.10.1+
# Query: mdm_miRNA99
# Database: /home/leclercqj/Apple/all_mature_PNRD.fadb
# 0 hits found
# BLASTN 2.10.1+
# Query: mdm_miRNA100
# Database: /home/leclercqj/Apple/all_mature_PNRD.fadb
# 0 hits found
# BLASTN 2.10.1+
# Query: mdm_miRNA101
# Database: /home/leclercqj/Apple/all_mature_PNRD.fadb
# Fields: query acc.ver, subject acc.ver, % identity, alignment length, mismatches, gap opens, q. start, q. end, s. start, s. end, evalue, bit score
# 6 hits found
mdm_miRNA101	sit-miR50-npr	100.000	21	0	0	1	21	1	21	1.23e-06	39.2
mdm_miRNA101	zma-miR171k	100.000	20	0	0	1	20	2	21	4.29e-06	37.4
mdm_miRNA101	zma-miR171h	100.000	20	0	0	1	20	2	21	4.29e-06	37.4
mdm_miRNA101	sbi-miR171f	100.000	20	0	0	1	20	2	21	4.29e-06	37.4
mdm_miRNA101	sbi-miR171e	100.000	20	0	0	1	20	2	21	4.29e-06	37.4
mdm_miRNA101	osa-miR171h	100.000	20	0	0	1	20	2	21	4.29e-06	37.4
# BLASTN 2.10.1+
# Query: mdm_miRNA102
# Database: /home/leclercqj/Apple/all_mature_PNRD.fadb
# 0 hits found
# BLASTN 2.10.1+
# Query: mdm_miRNA103
# Database: /home/leclercqj/Apple/all_mature_PNRD.fadb
# Fields: query acc.ver, subject acc.ver, % identity, alignment length, mismatches, gap opens, q. start, q. end, s. start, s. end, evalue, bit score
# 42 hits found
mdm_miRNA103	zma-miR159m	100.000	20	0	0	1	20	1	20	4.29e-06	37.4
mdm_miRNA103	zma-miR159k	100.000	20	0	0	1	20	1	20	4.29e-06	37.4
mdm_miRNA103	zma-miR159j	100.000	20	0	0	1	20	1	20	4.29e-06	37.4
mdm_miRNA103	zma-miR159b	100.000	20	0	0	1	20	1	20	4.29e-06	37.4
mdm_miRNA103	zma-miR159a	100.000	20	0	0	1	20	1	20	4.29e-06	37.4
mdm_miRNA103	vvi-miR159c	100.000	20	0	0	1	20	1	20	4.29e-06	37.4
mdm_miRNA103	vun-miR159a	100.000	20	0	0	1	20	1	20	4.29e-06	37.4
mdm_miRNA103	tae-miR159b	100.000	20	0	0	1	20	1	20	4.29e-06	37.4
mdm_miRNA103	tae-miR159a	100.000	20	0	0	1	20	1	20	4.29e-06	37.4
mdm_miRNA103	ssp-miR159a	100.000	20	0	0	1	20	1	20	4.29e-06	37.4
mdm_miRNA103	spr-miR159	100.000	20	0	0	1	20	1	20	4.29e-06	37.4
mdm_miRNA103	sof-miR159d	100.000	20	0	0	1	20	1	20	4.29e-06	37.4
mdm_miRNA103	sof-miR159b	100.000	20	0	0	1	20	1	20	4.29e-06	37.4
mdm_miRNA103	sof-miR159a	100.000	20	0	0	1	20	1	20	4.29e-06	37.4
mdm_miRNA103	sly-miR159	100.000	20	0	0	1	20	1	20	4.29e-06	37.4
mdm_miRNA103	sbi-miR159	100.000	20	0	0	1	20	1	20	4.29e-06	37.4
mdm_miRNA103	sar-miR159	100.000	20	0	0	1	20	1	20	4.29e-06	37.4
mdm_miRNA103	rco-miR159	100.000	20	0	0	1	20	1	20	4.29e-06	37.4
mdm_miRNA103	pvu-miR159	100.000	20	0	0	1	20	1	20	4.29e-06	37.4
mdm_miRNA103	ptc-miR159c	100.000	20	0	0	1	20	1	20	4.29e-06	37.4
mdm_miRNA103	ptc-miR159b	100.000	20	0	0	1	20	1	20	4.29e-06	37.4
mdm_miRNA103	ptc-miR159a	100.000	20	0	0	1	20	1	20	4.29e-06	37.4
mdm_miRNA103	pgl-miR159	100.000	20	0	0	1	20	1	20	4.29e-06	37.4
mdm_miRNA103	osa-miR159m	100.000	20	0	0	1	20	1	20	4.29e-06	37.4
mdm_miRNA103	osa-miR159b	100.000	20	0	0	1	20	1	20	4.29e-06	37.4
mdm_miRNA103	osa-miR159a	100.000	20	0	0	1	20	1	20	4.29e-06	37.4
mdm_miRNA103	oru-miR159	100.000	20	0	0	1	20	1	20	4.29e-06	37.4
mdm_miRNA103	mtr-miR159c	100.000	20	0	0	1	20	1	20	4.29e-06	37.4
mdm_miRNA103	mtr-miR159a	100.000	20	0	0	1	20	1	20	4.29e-06	37.4
mdm_miRNA103	ltu-miR159	100.000	20	0	0	1	20	1	20	4.29e-06	37.4
mdm_miRNA103	hvu-miR159b	100.000	20	0	0	1	20	1	20	4.29e-06	37.4
mdm_miRNA103	hvu-miR159a	100.000	20	0	0	1	20	1	20	4.29e-06	37.4
mdm_miRNA103	gma-miR159a	100.000	20	0	0	1	20	1	20	4.29e-06	37.4
mdm_miRNA103	far-miR159	100.000	20	0	0	1	20	1	20	4.29e-06	37.4
mdm_miRNA103	csi-miR159	100.000	20	0	0	1	20	1	20	4.29e-06	37.4
mdm_miRNA103	bra-miR159a	100.000	20	0	0	1	20	1	20	4.29e-06	37.4
mdm_miRNA103	bna-miR159	100.000	20	0	0	1	20	1	20	4.29e-06	37.4
mdm_miRNA103	ath-miR159b	100.000	20	0	0	1	20	1	20	4.29e-06	37.4
mdm_miRNA103	ath-miR159a	100.000	20	0	0	1	20	1	20	4.29e-06	37.4
mdm_miRNA103	aly-miR159b	100.000	20	0	0	1	20	1	20	4.29e-06	37.4
mdm_miRNA103	aly-miR159a	100.000	20	0	0	1	20	1	20	4.29e-06	37.4
mdm_miRNA103	ahy-miR159	100.000	20	0	0	1	20	1	20	4.29e-06	37.4
# BLASTN 2.10.1+
# Query: mdm_miRNA104
# Database: /home/leclercqj/Apple/all_mature_PNRD.fadb
# 0 hits found
# BLASTN 2.10.1+
# Query: mdm_miRNA105
# Database: /home/leclercqj/Apple/all_mature_PNRD.fadb
# 0 hits found
# BLASTN 2.10.1+
# Query: mdm_miRNA106
# Database: /home/leclercqj/Apple/all_mature_PNRD.fadb
# Fields: query acc.ver, subject acc.ver, % identity, alignment length, mismatches, gap opens, q. start, q. end, s. start, s. end, evalue, bit score
# 7 hits found
mdm_miRNA106	vvi-miR171f	100.000	21	0	0	1	21	1	21	1.23e-06	39.2
mdm_miRNA106	vun-miR171f	100.000	21	0	0	1	21	1	21	1.23e-06	39.2
mdm_miRNA106	ptc-miRf10666-akr	100.000	21	0	0	1	21	3	23	1.23e-06	39.2
mdm_miRNA106	ptc-miRf10509-akr	100.000	21	0	0	1	21	3	23	1.23e-06	39.2
mdm_miRNA106	sly-miR171d	100.000	20	0	0	1	20	1	20	4.29e-06	37.4
mdm_miRNA106	ppt-miR171b	100.000	20	0	0	1	20	1	20	4.29e-06	37.4
mdm_miRNA106	csi-miR171a	100.000	20	0	0	1	20	1	20	4.29e-06	37.4
# BLASTN 2.10.1+
# Query: mdm_miRNA107
# Database: /home/leclercqj/Apple/all_mature_PNRD.fadb
# Fields: query acc.ver, subject acc.ver, % identity, alignment length, mismatches, gap opens, q. start, q. end, s. start, s. end, evalue, bit score
# 50 hits found
mdm_miRNA107	zma-miR396l	100.000	20	0	0	1	20	1	20	3.75e-06	37.4
mdm_miRNA107	zma-miR396k	100.000	20	0	0	1	20	1	20	3.75e-06	37.4
mdm_miRNA107	zma-miR396j	100.000	20	0	0	1	20	1	20	3.75e-06	37.4
mdm_miRNA107	zma-miR396i	100.000	20	0	0	1	20	1	20	3.75e-06	37.4
mdm_miRNA107	zma-miR396h	100.000	20	0	0	1	20	1	20	3.75e-06	37.4
mdm_miRNA107	zma-miR396g	100.000	20	0	0	1	20	1	20	3.75e-06	37.4
mdm_miRNA107	zma-miR396f	100.000	20	0	0	1	20	1	20	3.75e-06	37.4
mdm_miRNA107	zma-miR396c	100.000	20	0	0	1	20	1	20	3.75e-06	37.4
mdm_miRNA107	zma-miR396b	100.000	20	0	0	1	20	1	20	3.75e-06	37.4
mdm_miRNA107	zma-miR396a	100.000	20	0	0	1	20	1	20	3.75e-06	37.4
mdm_miRNA107	vvi-miR396d	100.000	20	0	0	1	20	1	20	3.75e-06	37.4
mdm_miRNA107	vvi-miR396c	100.000	20	0	0	1	20	1	20	3.75e-06	37.4
mdm_miRNA107	vvi-miR396b	100.000	20	0	0	1	20	1	20	3.75e-06	37.4
mdm_miRNA107	vvi-miR396a	100.000	20	0	0	1	20	1	20	3.75e-06	37.4
mdm_miRNA107	vun-miR396a	100.000	20	0	0	1	20	1	20	3.75e-06	37.4
mdm_miRNA107	tcc-miR396e	100.000	20	0	0	1	20	1	20	3.75e-06	37.4
mdm_miRNA107	tcc-miR396c	100.000	20	0	0	1	20	1	20	3.75e-06	37.4
mdm_miRNA107	tcc-miR396b	100.000	20	0	0	1	20	1	20	3.75e-06	37.4
mdm_miRNA107	tcc-miR396a	100.000	20	0	0	1	20	1	20	3.75e-06	37.4
mdm_miRNA107	ssp-miR396	100.000	20	0	0	1	20	1	20	3.75e-06	37.4
mdm_miRNA107	sof-miR396	100.000	20	0	0	1	20	1	20	3.75e-06	37.4
mdm_miRNA107	sbi-miR396c	100.000	20	0	0	1	20	1	20	3.75e-06	37.4
mdm_miRNA107	sbi-miR396b	100.000	20	0	0	1	20	1	20	3.75e-06	37.4
mdm_miRNA107	sbi-miR396a	100.000	20	0	0	1	20	1	20	3.75e-06	37.4
mdm_miRNA107	rco-miR396	100.000	20	0	0	1	20	1	20	3.75e-06	37.4
mdm_miRNA107	ptc-miRf10482-akr	100.000	20	0	0	1	20	20	1	3.75e-06	37.4
mdm_miRNA107	ptc-miRf10258-akr	100.000	20	0	0	1	20	20	1	3.75e-06	37.4
mdm_miRNA107	ptc-miR396e	100.000	20	0	0	1	20	1	20	3.75e-06	37.4
mdm_miRNA107	ptc-miR396d	100.000	20	0	0	1	20	1	20	3.75e-06	37.4
mdm_miRNA107	ptc-miR396c	100.000	20	0	0	1	20	1	20	3.75e-06	37.4
mdm_miRNA107	ptc-miR396b	100.000	20	0	0	1	20	1	20	3.75e-06	37.4
mdm_miRNA107	ptc-miR396a	100.000	20	0	0	1	20	1	20	3.75e-06	37.4
mdm_miRNA107	pta-miR396	100.000	20	0	0	1	20	1	20	3.75e-06	37.4
mdm_miRNA107	pab-miR396a	100.000	20	0	0	1	20	1	20	3.75e-06	37.4
mdm_miRNA107	osa-miR396c	100.000	20	0	0	1	20	1	20	3.75e-06	37.4
mdm_miRNA107	osa-miR396b	100.000	20	0	0	1	20	1	20	3.75e-06	37.4
mdm_miRNA107	osa-miR396a	100.000	20	0	0	1	20	1	20	3.75e-06	37.4
mdm_miRNA107	mtr-miR396b	100.000	20	0	0	1	20	1	20	3.75e-06	37.4
mdm_miRNA107	mtr-miR396a	100.000	20	0	0	1	20	1	20	3.75e-06	37.4
mdm_miRNA107	lja-miR396	100.000	20	0	0	1	20	1	20	3.75e-06	37.4
mdm_miRNA107	gma-miR396e	100.000	20	0	0	1	20	1	20	3.75e-06	37.4
mdm_miRNA107	gma-miR396c	100.000	20	0	0	1	20	1	20	3.75e-06	37.4
mdm_miRNA107	gma-miR396b	100.000	20	0	0	1	20	1	20	3.75e-06	37.4
mdm_miRNA107	gma-miR396a	100.000	20	0	0	1	20	1	20	3.75e-06	37.4
mdm_miRNA107	ghr-miR396c	100.000	20	0	0	1	20	1	20	3.75e-06	37.4
mdm_miRNA107	ghr-miR396b	100.000	20	0	0	1	20	1	20	3.75e-06	37.4
mdm_miRNA107	csi-miR396b	100.000	20	0	0	1	20	1	20	3.75e-06	37.4
mdm_miRNA107	csi-miR396a	100.000	20	0	0	1	20	1	20	3.75e-06	37.4
mdm_miRNA107	ccl-miR396	100.000	20	0	0	1	20	1	20	3.75e-06	37.4
mdm_miRNA107	bna-miR396a	100.000	20	0	0	1	20	1	20	3.75e-06	37.4
# BLASTN 2.10.1+
# Query: mdm_miRNA108
# Database: /home/leclercqj/Apple/all_mature_PNRD.fadb
# 0 hits found
# BLASTN 2.10.1+
# Query: mdm_miRNA109
# Database: /home/leclercqj/Apple/all_mature_PNRD.fadb
# 0 hits found
# BLASTN 2.10.1+
# Query: mdm_miRNA110
# Database: /home/leclercqj/Apple/all_mature_PNRD.fadb
# 0 hits found
# BLASTN 2.10.1+
# Query: mdm_miRNA111
# Database: /home/leclercqj/Apple/all_mature_PNRD.fadb
# Fields: query acc.ver, subject acc.ver, % identity, alignment length, mismatches, gap opens, q. start, q. end, s. start, s. end, evalue, bit score
# 33 hits found
mdm_miRNA111	zma-miR393g	100.000	21	0	0	1	21	1	21	1.23e-06	39.2
mdm_miRNA111	zma-miR393f	100.000	21	0	0	1	21	1	21	1.23e-06	39.2
mdm_miRNA111	zma-miR393c	100.000	21	0	0	1	21	1	21	1.23e-06	39.2
mdm_miRNA111	zma-miR393b	100.000	21	0	0	1	21	1	21	1.23e-06	39.2
mdm_miRNA111	zma-miR393a	100.000	21	0	0	1	21	1	21	1.23e-06	39.2
mdm_miRNA111	zma-miR393	100.000	21	0	0	1	21	1	21	1.23e-06	39.2
mdm_miRNA111	vvi-miR393b	100.000	21	0	0	1	21	1	21	1.23e-06	39.2
mdm_miRNA111	vvi-miR393a	100.000	21	0	0	1	21	1	21	1.23e-06	39.2
mdm_miRNA111	vun-miR393b	100.000	21	0	0	1	21	2	22	1.23e-06	39.2
mdm_miRNA111	vun-miR393a.2	100.000	21	0	0	1	21	1	21	1.23e-06	39.2
mdm_miRNA111	vun-miR393a.1	100.000	21	0	0	1	21	1	21	1.23e-06	39.2
mdm_miRNA111	tcc-miR393b	100.000	21	0	0	1	21	1	21	1.23e-06	39.2
mdm_miRNA111	tcc-miR393a	100.000	21	0	0	1	21	1	21	1.23e-06	39.2
mdm_miRNA111	sbi-miR393	100.000	21	0	0	1	21	1	21	1.23e-06	39.2
mdm_miRNA111	rco-miR393	100.000	21	0	0	1	21	1	21	1.23e-06	39.2
mdm_miRNA111	ptc-miR393d	100.000	21	0	0	1	21	1	21	1.23e-06	39.2
mdm_miRNA111	ptc-miR393c	100.000	21	0	0	1	21	1	21	1.23e-06	39.2
mdm_miRNA111	ptc-miR393b	100.000	21	0	0	1	21	1	21	1.23e-06	39.2
mdm_miRNA111	ptc-miR393a	100.000	21	0	0	1	21	1	21	1.23e-06	39.2
mdm_miRNA111	osa-miR393b	100.000	21	0	0	1	21	1	21	1.23e-06	39.2
mdm_miRNA111	osa-miR393	100.000	21	0	0	1	21	1	21	1.23e-06	39.2
mdm_miRNA111	mtr-miR393b	100.000	21	0	0	1	21	1	21	1.23e-06	39.2
mdm_miRNA111	mtr-miR393	100.000	21	0	0	1	21	1	21	1.23e-06	39.2
mdm_miRNA111	gma-miR393	100.000	21	0	0	1	21	1	21	1.23e-06	39.2
mdm_miRNA111	ghr-miR393	100.000	21	0	0	1	21	1	21	1.23e-06	39.2
mdm_miRNA111	csi-miR393	100.000	21	0	0	1	21	2	22	1.23e-06	39.2
mdm_miRNA111	bna-miR393	100.000	21	0	0	1	21	1	21	1.23e-06	39.2
mdm_miRNA111	bdi-miR393b	100.000	21	0	0	1	21	1	21	1.23e-06	39.2
mdm_miRNA111	bdi-miR393a	100.000	21	0	0	1	21	1	21	1.23e-06	39.2
mdm_miRNA111	ath-miR393b	100.000	21	0	0	1	21	1	21	1.23e-06	39.2
mdm_miRNA111	ath-miR393a	100.000	21	0	0	1	21	1	21	1.23e-06	39.2
mdm_miRNA111	aly-miR393b	100.000	21	0	0	1	21	1	21	1.23e-06	39.2
mdm_miRNA111	aly-miR393a	100.000	21	0	0	1	21	1	21	1.23e-06	39.2
# BLASTN 2.10.1+
# Query: mdm_miRNA112
# Database: /home/leclercqj/Apple/all_mature_PNRD.fadb
# 0 hits found
# BLASTN 2.10.1+
# Query: mdm_miRNA113
# Database: /home/leclercqj/Apple/all_mature_PNRD.fadb
# 0 hits found
# BLASTN 2.10.1+
# Query: mdm_miRNA114
# Database: /home/leclercqj/Apple/all_mature_PNRD.fadb
# 0 hits found
# BLASTN 2.10.1+
# Query: mdm_miRNA115
# Database: /home/leclercqj/Apple/all_mature_PNRD.fadb
# Fields: query acc.ver, subject acc.ver, % identity, alignment length, mismatches, gap opens, q. start, q. end, s. start, s. end, evalue, bit score
# 50 hits found
mdm_miRNA115	zma-miR396l	100.000	21	0	0	1	21	1	21	1.23e-06	39.2
mdm_miRNA115	zma-miR396k	100.000	21	0	0	1	21	1	21	1.23e-06	39.2
mdm_miRNA115	zma-miR396j	100.000	21	0	0	1	21	1	21	1.23e-06	39.2
mdm_miRNA115	zma-miR396i	100.000	21	0	0	1	21	1	21	1.23e-06	39.2
mdm_miRNA115	zma-miR396h	100.000	21	0	0	1	21	1	21	1.23e-06	39.2
mdm_miRNA115	zma-miR396c	100.000	21	0	0	1	21	1	21	1.23e-06	39.2
mdm_miRNA115	zma-miR396b	100.000	21	0	0	1	21	1	21	1.23e-06	39.2
mdm_miRNA115	zma-miR396a	100.000	21	0	0	1	21	1	21	1.23e-06	39.2
mdm_miRNA115	vvi-miR396d	100.000	21	0	0	1	21	1	21	1.23e-06	39.2
mdm_miRNA115	vvi-miR396c	100.000	21	0	0	1	21	1	21	1.23e-06	39.2
mdm_miRNA115	vun-miR396a	100.000	21	0	0	1	21	1	21	1.23e-06	39.2
mdm_miRNA115	tcc-miR396b	100.000	21	0	0	1	21	1	21	1.23e-06	39.2
mdm_miRNA115	tcc-miR396a	100.000	21	0	0	1	21	1	21	1.23e-06	39.2
mdm_miRNA115	ssp-miR396	100.000	21	0	0	1	21	1	21	1.23e-06	39.2
mdm_miRNA115	sof-miR396	100.000	21	0	0	1	21	1	21	1.23e-06	39.2
mdm_miRNA115	sbi-miR396b	100.000	21	0	0	1	21	1	21	1.23e-06	39.2
mdm_miRNA115	sbi-miR396a	100.000	21	0	0	1	21	1	21	1.23e-06	39.2
mdm_miRNA115	ptc-miR396b	100.000	21	0	0	1	21	1	21	1.23e-06	39.2
mdm_miRNA115	ptc-miR396a	100.000	21	0	0	1	21	1	21	1.23e-06	39.2
mdm_miRNA115	osa-miR396b	100.000	21	0	0	1	21	1	21	1.23e-06	39.2
mdm_miRNA115	osa-miR396a	100.000	21	0	0	1	21	1	21	1.23e-06	39.2
mdm_miRNA115	mtr-miR396b	100.000	21	0	0	1	21	1	21	1.23e-06	39.2
mdm_miRNA115	lja-miR396	100.000	21	0	0	1	21	1	21	1.23e-06	39.2
mdm_miRNA115	gma-miR396e	100.000	21	0	0	1	21	1	21	1.23e-06	39.2
mdm_miRNA115	gma-miR396a	100.000	21	0	0	1	21	1	21	1.23e-06	39.2
mdm_miRNA115	ghr-miR396c	100.000	21	0	0	1	21	1	21	1.23e-06	39.2
mdm_miRNA115	ghr-miR396b	100.000	21	0	0	1	21	1	21	1.23e-06	39.2
mdm_miRNA115	csi-miR396b	100.000	21	0	0	1	21	1	21	1.23e-06	39.2
mdm_miRNA115	csi-miR396a	100.000	21	0	0	1	21	1	21	1.23e-06	39.2
mdm_miRNA115	bdi-miR396d	100.000	21	0	0	1	21	1	21	1.23e-06	39.2
mdm_miRNA115	bdi-miR396c	100.000	21	0	0	1	21	1	21	1.23e-06	39.2
mdm_miRNA115	ath-miR396a	100.000	21	0	0	1	21	1	21	1.23e-06	39.2
mdm_miRNA115	aqc-miR396a	100.000	21	0	0	1	21	1	21	1.23e-06	39.2
mdm_miRNA115	aly-miR396a	100.000	21	0	0	1	21	1	21	1.23e-06	39.2
mdm_miRNA115	zma-miR396g	100.000	20	0	0	1	20	1	20	4.29e-06	37.4
mdm_miRNA115	zma-miR396f	100.000	20	0	0	1	20	1	20	4.29e-06	37.4
mdm_miRNA115	vvi-miR396b	100.000	20	0	0	1	20	1	20	4.29e-06	37.4
mdm_miRNA115	vvi-miR396a	100.000	20	0	0	1	20	1	20	4.29e-06	37.4
mdm_miRNA115	tcc-miR396e	100.000	20	0	0	1	20	1	20	4.29e-06	37.4
mdm_miRNA115	tcc-miR396c	100.000	20	0	0	1	20	1	20	4.29e-06	37.4
mdm_miRNA115	sbi-miR396c	100.000	20	0	0	1	20	1	20	4.29e-06	37.4
mdm_miRNA115	rco-miR396	100.000	20	0	0	1	20	1	20	4.29e-06	37.4
mdm_miRNA115	ptc-miRf10482-akr	100.000	20	0	0	1	20	20	1	4.29e-06	37.4
mdm_miRNA115	ptc-miRf10258-akr	100.000	20	0	0	1	20	20	1	4.29e-06	37.4
mdm_miRNA115	ptc-miR396e	100.000	20	0	0	1	20	1	20	4.29e-06	37.4
mdm_miRNA115	ptc-miR396d	100.000	20	0	0	1	20	1	20	4.29e-06	37.4
mdm_miRNA115	ptc-miR396c	100.000	20	0	0	1	20	1	20	4.29e-06	37.4
mdm_miRNA115	pta-miR396	100.000	20	0	0	1	20	1	20	4.29e-06	37.4
mdm_miRNA115	pab-miR396a	100.000	20	0	0	1	20	1	20	4.29e-06	37.4
mdm_miRNA115	osa-miR396c	100.000	20	0	0	1	20	1	20	4.29e-06	37.4
# BLASTN 2.10.1+
# Query: mdm_miRNA116
# Database: /home/leclercqj/Apple/all_mature_PNRD.fadb
# 0 hits found
# BLASTN 2.10.1+
# Query: mdm_miRNA117
# Database: /home/leclercqj/Apple/all_mature_PNRD.fadb
# 0 hits found
# BLASTN 2.10.1+
# Query: mdm_miRNA118
# Database: /home/leclercqj/Apple/all_mature_PNRD.fadb
# Fields: query acc.ver, subject acc.ver, % identity, alignment length, mismatches, gap opens, q. start, q. end, s. start, s. end, evalue, bit score
# 22 hits found
mdm_miRNA118	osa-miR159f	100.000	21	0	0	1	21	1	21	1.23e-06	39.2
mdm_miRNA118	vvi-miR159c	100.000	20	0	0	2	21	2	21	4.29e-06	37.4
mdm_miRNA118	vun-miR159a	100.000	20	0	0	2	21	2	21	4.29e-06	37.4
mdm_miRNA118	sly-miR159	100.000	20	0	0	2	21	2	21	4.29e-06	37.4
mdm_miRNA118	rco-miR159	100.000	20	0	0	2	21	2	21	4.29e-06	37.4
mdm_miRNA118	pvu-miR159	100.000	20	0	0	2	21	2	21	4.29e-06	37.4
mdm_miRNA118	ptc-miRf10271-akr	100.000	20	0	0	2	21	1	20	4.29e-06	37.4
mdm_miRNA118	ptc-miR159c	100.000	20	0	0	2	21	2	21	4.29e-06	37.4
mdm_miRNA118	ptc-miR159b	100.000	20	0	0	2	21	2	21	4.29e-06	37.4
mdm_miRNA118	ptc-miR159a	100.000	20	0	0	2	21	2	21	4.29e-06	37.4
mdm_miRNA118	mtr-miR319b	100.000	20	0	0	2	21	1	20	4.29e-06	37.4
mdm_miRNA118	mtr-miR159c	100.000	20	0	0	2	21	2	21	4.29e-06	37.4
mdm_miRNA118	mtr-miR159a	100.000	20	0	0	2	21	2	21	4.29e-06	37.4
mdm_miRNA118	ltu-miR159	100.000	20	0	0	2	21	2	21	4.29e-06	37.4
mdm_miRNA118	gma-miR159a	100.000	20	0	0	2	21	2	21	4.29e-06	37.4
mdm_miRNA118	csi-miR159	100.000	20	0	0	2	21	2	21	4.29e-06	37.4
mdm_miRNA118	bra-miR159a	100.000	20	0	0	2	21	2	21	4.29e-06	37.4
mdm_miRNA118	bna-miR159	100.000	20	0	0	2	21	2	21	4.29e-06	37.4
mdm_miRNA118	bdi-miR159	100.000	20	0	0	1	20	1	20	4.29e-06	37.4
mdm_miRNA118	ath-miR159a	100.000	20	0	0	2	21	2	21	4.29e-06	37.4
mdm_miRNA118	aly-miR159a	100.000	20	0	0	2	21	2	21	4.29e-06	37.4
mdm_miRNA118	ahy-miR159	100.000	20	0	0	2	21	2	21	4.29e-06	37.4
# BLASTN 2.10.1+
# Query: mdm_miRNA119
# Database: /home/leclercqj/Apple/all_mature_PNRD.fadb
# Fields: query acc.ver, subject acc.ver, % identity, alignment length, mismatches, gap opens, q. start, q. end, s. start, s. end, evalue, bit score
# 8 hits found
mdm_miRNA119	vun-miR166b.3	100.000	21	0	0	1	21	1	21	1.23e-06	39.2
mdm_miRNA119	vun-miR166b.2	100.000	21	0	0	1	21	1	21	1.23e-06	39.2
mdm_miRNA119	sit-miR166b-3	100.000	21	0	0	1	21	1	21	1.23e-06	39.2
mdm_miRNA119	sit-miR166b-2	100.000	21	0	0	1	21	1	21	1.23e-06	39.2
mdm_miRNA119	sit-miR166b-1	100.000	21	0	0	1	21	1	21	1.23e-06	39.2
mdm_miRNA119	bdi-miR166f	100.000	21	0	0	1	21	1	21	1.23e-06	39.2
mdm_miRNA119	ptc-miRf10514-akr	100.000	20	0	0	2	21	1	20	4.29e-06	37.4
mdm_miRNA119	bdi-miR166e	100.000	20	0	0	2	21	1	20	4.29e-06	37.4
# BLASTN 2.10.1+
# Query: mdm_miRNA120
# Database: /home/leclercqj/Apple/all_mature_PNRD.fadb
# 0 hits found
# BLASTN 2.10.1+
# Query: mdm_miRNA121
# Database: /home/leclercqj/Apple/all_mature_PNRD.fadb
# 0 hits found
# BLASTN 2.10.1+
# Query: mdm_miRNA122
# Database: /home/leclercqj/Apple/all_mature_PNRD.fadb
# Fields: query acc.ver, subject acc.ver, % identity, alignment length, mismatches, gap opens, q. start, q. end, s. start, s. end, evalue, bit score
# 50 hits found
mdm_miRNA122	sit-miR60-npr	100.000	22	0	0	1	22	1	22	3.11e-07	41.0
mdm_miRNA122	zma-miR166t	100.000	21	0	0	1	21	1	21	1.09e-06	39.2
mdm_miRNA122	zma-miR166s	100.000	21	0	0	1	21	1	21	1.09e-06	39.2
mdm_miRNA122	zma-miR166r	100.000	21	0	0	1	21	1	21	1.09e-06	39.2
mdm_miRNA122	zma-miR166q	100.000	21	0	0	1	21	1	21	1.09e-06	39.2
mdm_miRNA122	zma-miR166p	100.000	21	0	0	1	21	1	21	1.09e-06	39.2
mdm_miRNA122	zma-miR166o	100.000	21	0	0	1	21	1	21	1.09e-06	39.2
mdm_miRNA122	zma-miR166n	100.000	21	0	0	1	21	1	21	1.09e-06	39.2
mdm_miRNA122	zma-miR166a	100.000	21	0	0	1	21	1	21	1.09e-06	39.2
mdm_miRNA122	vvi-miR166h	100.000	21	0	0	1	21	1	21	1.09e-06	39.2
mdm_miRNA122	vvi-miR166g	100.000	21	0	0	1	21	1	21	1.09e-06	39.2
mdm_miRNA122	vvi-miR166f	100.000	21	0	0	1	21	1	21	1.09e-06	39.2
mdm_miRNA122	vvi-miR166e	100.000	21	0	0	1	21	1	21	1.09e-06	39.2
mdm_miRNA122	vvi-miR166d	100.000	21	0	0	1	21	1	21	1.09e-06	39.2
mdm_miRNA122	vvi-miR166c	100.000	21	0	0	1	21	1	21	1.09e-06	39.2
mdm_miRNA122	vun-miR166d.3	100.000	21	0	0	1	21	1	21	1.09e-06	39.2
mdm_miRNA122	vun-miR166d.2	100.000	21	0	0	1	21	1	21	1.09e-06	39.2
mdm_miRNA122	vun-miR166d.1	100.000	21	0	0	1	21	1	21	1.09e-06	39.2
mdm_miRNA122	vun-miR166b.1	100.000	21	0	0	1	21	1	21	1.09e-06	39.2
mdm_miRNA122	tcc-miR166d	100.000	21	0	0	1	21	1	21	1.09e-06	39.2
mdm_miRNA122	tcc-miR166a	100.000	21	0	0	1	21	1	21	1.09e-06	39.2
mdm_miRNA122	sof-miR166	100.000	21	0	0	1	21	1	21	1.09e-06	39.2
mdm_miRNA122	smo-miR166c	100.000	21	0	0	1	21	1	21	1.09e-06	39.2
mdm_miRNA122	smo-miR166b	100.000	21	0	0	1	21	1	21	1.09e-06	39.2
mdm_miRNA122	smo-miR166a	100.000	21	0	0	1	21	1	21	1.09e-06	39.2
mdm_miRNA122	sly-miR166b	100.000	21	0	0	1	21	1	21	1.09e-06	39.2
mdm_miRNA122	sly-miR166a	100.000	21	0	0	1	21	1	21	1.09e-06	39.2
mdm_miRNA122	sit-miR59-npr	100.000	21	0	0	1	21	1	21	1.09e-06	39.2
mdm_miRNA122	sit-miR58-3-npr	100.000	21	0	0	1	21	1	21	1.09e-06	39.2
mdm_miRNA122	sit-miR58-2-npr	100.000	21	0	0	1	21	1	21	1.09e-06	39.2
mdm_miRNA122	sit-miR58-1-npr	100.000	21	0	0	1	21	1	21	1.09e-06	39.2
mdm_miRNA122	sit-miR21-2-npr	100.000	21	0	0	1	21	2	22	1.09e-06	39.2
mdm_miRNA122	sit-miR21-1-npr	100.000	21	0	0	1	21	2	22	1.09e-06	39.2
mdm_miRNA122	sit-miR166a-5	100.000	21	0	0	1	21	1	21	1.09e-06	39.2
mdm_miRNA122	sit-miR166a-4	100.000	21	0	0	1	21	1	21	1.09e-06	39.2
mdm_miRNA122	sit-miR166a-3	100.000	21	0	0	1	21	1	21	1.09e-06	39.2
mdm_miRNA122	sit-miR166a-2	100.000	21	0	0	1	21	1	21	1.09e-06	39.2
mdm_miRNA122	sit-miR166a-1	100.000	21	0	0	1	21	1	21	1.09e-06	39.2
mdm_miRNA122	rco-miR166e	100.000	21	0	0	1	21	1	21	1.09e-06	39.2
mdm_miRNA122	rco-miR166d	100.000	21	0	0	1	21	1	21	1.09e-06	39.2
mdm_miRNA122	rco-miR166c	100.000	21	0	0	1	21	1	21	1.09e-06	39.2
mdm_miRNA122	rco-miR166b	100.000	21	0	0	1	21	1	21	1.09e-06	39.2
mdm_miRNA122	rco-miR166a	100.000	21	0	0	1	21	1	21	1.09e-06	39.2
mdm_miRNA122	pvu-miR166	100.000	21	0	0	1	21	1	21	1.09e-06	39.2
mdm_miRNA122	ptc-miR166m	100.000	21	0	0	1	21	1	21	1.09e-06	39.2
mdm_miRNA122	ptc-miR166l	100.000	21	0	0	1	21	1	21	1.09e-06	39.2
mdm_miRNA122	ptc-miR166k	100.000	21	0	0	1	21	1	21	1.09e-06	39.2
mdm_miRNA122	ptc-miR166j	100.000	21	0	0	1	21	1	21	1.09e-06	39.2
mdm_miRNA122	ptc-miR166i	100.000	21	0	0	1	21	1	21	1.09e-06	39.2
mdm_miRNA122	ptc-miR166h	100.000	21	0	0	1	21	1	21	1.09e-06	39.2
# BLASTN 2.10.1+
# Query: mdm_miRNA123
# Database: /home/leclercqj/Apple/all_mature_PNRD.fadb
# 0 hits found
# BLASTN 2.10.1+
# Query: mdm_miRNA124
# Database: /home/leclercqj/Apple/all_mature_PNRD.fadb
# 0 hits found
# BLASTN 2.10.1+
# Query: mdm_miRNA125
# Database: /home/leclercqj/Apple/all_mature_PNRD.fadb
# 0 hits found
# BLASTN 2.10.1+
# Query: mdm_miRNA126
# Database: /home/leclercqj/Apple/all_mature_PNRD.fadb
# Fields: query acc.ver, subject acc.ver, % identity, alignment length, mismatches, gap opens, q. start, q. end, s. start, s. end, evalue, bit score
# 42 hits found
mdm_miRNA126	zma-miR159m	100.000	21	0	0	1	21	1	21	1.23e-06	39.2
mdm_miRNA126	zma-miR159k	100.000	21	0	0	1	21	1	21	1.23e-06	39.2
mdm_miRNA126	zma-miR159j	100.000	21	0	0	1	21	1	21	1.23e-06	39.2
mdm_miRNA126	zma-miR159b	100.000	21	0	0	1	21	1	21	1.23e-06	39.2
mdm_miRNA126	zma-miR159a	100.000	21	0	0	1	21	1	21	1.23e-06	39.2
mdm_miRNA126	tae-miR159b	100.000	21	0	0	1	21	1	21	1.23e-06	39.2
mdm_miRNA126	tae-miR159a	100.000	21	0	0	1	21	1	21	1.23e-06	39.2
mdm_miRNA126	ssp-miR159a	100.000	21	0	0	1	21	1	21	1.23e-06	39.2
mdm_miRNA126	spr-miR159	100.000	21	0	0	1	21	1	21	1.23e-06	39.2
mdm_miRNA126	sof-miR159d	100.000	21	0	0	1	21	1	21	1.23e-06	39.2
mdm_miRNA126	sof-miR159b	100.000	21	0	0	1	21	1	21	1.23e-06	39.2
mdm_miRNA126	sof-miR159a	100.000	21	0	0	1	21	1	21	1.23e-06	39.2
mdm_miRNA126	sbi-miR159	100.000	21	0	0	1	21	1	21	1.23e-06	39.2
mdm_miRNA126	sar-miR159	100.000	21	0	0	1	21	1	21	1.23e-06	39.2
mdm_miRNA126	pgl-miR159	100.000	21	0	0	1	21	1	21	1.23e-06	39.2
mdm_miRNA126	osa-miR159m	100.000	21	0	0	1	21	1	21	1.23e-06	39.2
mdm_miRNA126	osa-miR159b	100.000	21	0	0	1	21	1	21	1.23e-06	39.2
mdm_miRNA126	osa-miR159a	100.000	21	0	0	1	21	1	21	1.23e-06	39.2
mdm_miRNA126	oru-miR159	100.000	21	0	0	1	21	1	21	1.23e-06	39.2
mdm_miRNA126	hvu-miR159b	100.000	21	0	0	1	21	1	21	1.23e-06	39.2
mdm_miRNA126	hvu-miR159a	100.000	21	0	0	1	21	1	21	1.23e-06	39.2
mdm_miRNA126	far-miR159	100.000	21	0	0	1	21	1	21	1.23e-06	39.2
mdm_miRNA126	vvi-miR159c	100.000	20	0	0	1	20	1	20	4.29e-06	37.4
mdm_miRNA126	vun-miR159a	100.000	20	0	0	1	20	1	20	4.29e-06	37.4
mdm_miRNA126	sly-miR159	100.000	20	0	0	1	20	1	20	4.29e-06	37.4
mdm_miRNA126	rco-miR159	100.000	20	0	0	1	20	1	20	4.29e-06	37.4
mdm_miRNA126	pvu-miR159	100.000	20	0	0	1	20	1	20	4.29e-06	37.4
mdm_miRNA126	ptc-miR159c	100.000	20	0	0	1	20	1	20	4.29e-06	37.4
mdm_miRNA126	ptc-miR159b	100.000	20	0	0	1	20	1	20	4.29e-06	37.4
mdm_miRNA126	ptc-miR159a	100.000	20	0	0	1	20	1	20	4.29e-06	37.4
mdm_miRNA126	mtr-miR159c	100.000	20	0	0	1	20	1	20	4.29e-06	37.4
mdm_miRNA126	mtr-miR159a	100.000	20	0	0	1	20	1	20	4.29e-06	37.4
mdm_miRNA126	ltu-miR159	100.000	20	0	0	1	20	1	20	4.29e-06	37.4
mdm_miRNA126	gma-miR159a	100.000	20	0	0	1	20	1	20	4.29e-06	37.4
mdm_miRNA126	csi-miR159	100.000	20	0	0	1	20	1	20	4.29e-06	37.4
mdm_miRNA126	bra-miR159a	100.000	20	0	0	1	20	1	20	4.29e-06	37.4
mdm_miRNA126	bna-miR159	100.000	20	0	0	1	20	1	20	4.29e-06	37.4
mdm_miRNA126	ath-miR159b	100.000	20	0	0	1	20	1	20	4.29e-06	37.4
mdm_miRNA126	ath-miR159a	100.000	20	0	0	1	20	1	20	4.29e-06	37.4
mdm_miRNA126	aly-miR159b	100.000	20	0	0	1	20	1	20	4.29e-06	37.4
mdm_miRNA126	aly-miR159a	100.000	20	0	0	1	20	1	20	4.29e-06	37.4
mdm_miRNA126	ahy-miR159	100.000	20	0	0	1	20	1	20	4.29e-06	37.4
# BLASTN 2.10.1+
# Query: mdm_miRNA127
# Database: /home/leclercqj/Apple/all_mature_PNRD.fadb
# 0 hits found
# BLASTN 2.10.1+
# Query: mdm_miRNA128
# Database: /home/leclercqj/Apple/all_mature_PNRD.fadb
# 0 hits found
# BLASTN 2.10.1+
# Query: mdm_miRNA129
# Database: /home/leclercqj/Apple/all_mature_PNRD.fadb
[truncated: 3,386 more rows]

## Sheet: known_miRNA_expression
#NoX_mature_exp stands for the mature sequence raw reads count
#NoX_star_exp stands for the star sequence raw reads count
#NoX_mature_std stands for the mature sequence RPM
#NoX_star_std stands for the star sequence RPM.
#X corresponds to Library letter (A, B, C, D, E, F, G, H, I, J, K, L)
Mature_id	Mature_arm	Mature_seq	Star_id	Star_arm	Star_seq	LibA_mature_exp	LibA_star_exp	LibA_mature_std	LibA_star_std	LibB_mature_exp	LibB_star_exp	LibB_mature_std	LibB_star_std	LibC_mature_exp	LibC_star_exp	LibC_mature_std	LibC_star_std	LibD_mature_exp	LibD_star_exp	LibD_mature_std	LibD_star_std	LibE_mature_exp	LibE_star_exp	LibE_mature_std	LibE_star_std	LibF_mature_exp	LibF_star_exp	LibF_mature_std	LibF_star_std	LibG_mature_exp	LibG_star_exp	LibG_mature_std	LibG_star_std	LibH_mature_exp	LibH_star_exp	LibH_mature_std	LibH_star_std	LibI_mature_exp	LibI_star_exp	LibI_mature_std	LibI_star_std	LibJ_mature_exp	LibJ_star_exp	LibJ_mature_std	LibJ_star_std	LibK_mature_exp	LibK_star_exp	LibK_mature_std	LibK_star_std
mdm-miR166dMIMAT0025916,mdm-miR166bMIMAT0025914,mdm-miR166hMIMAT0025920,mdm-miR166eMIMAT0025917,mdm-miR166aMIMAT0025913,mdm-miR166iMIMAT0025921,mdm-miR166fMIMAT0025918,mdm-miR166gMIMAT0025919,mdm-miR166cMIMAT0025915,mdm-miR166jMIMAT0043545,aly-miR166a-3p,aly-miR166b-3p,aly-miR166c-3p,aly-miR166d-3p,aly-miR166e-3p,aly-miR166f-3p,aly-miR166g-3p,aly-miR166h-3p,aqc-miR166b,aqc-miR166e,ath-miR166a,ath…	TCGGACCAGGCTTCATTCCCC	1747791	92329.3	1218741	72078	1021288	71697.1	1545121	128974	802971	42658.5	981170	62758.4	1086168	57967.7	443716	31618.2	891166	50696.2	445694	25603.1	756349	37077.4	2096807	124626
mdm-miR159dMIMAT0043539,mdm-miR159eMIMAT0043540,mdm-miR159fMIMAT0043541,ahy-miR159,aly-miR159a-3p,ath-miR159a,bna-miR159,bra-miR159a,cme-miR159a,cpa-miR159a,csi-miR159,gma-miR159a-3p,gma-miR159e-3p,hbr-miR159a,htu-miR159a,ltu-miR159,mes-miR159a,mes-miR159b,mtr-miR159a,nta-miR159,ppe-miR159,ptc-miR159a,ptc-miR159b,pvu-miR159a.1,rco-miR159,sly-miR159,vun-miR159a,vvi-miR159c,ghr-miR159b,gba-miR159b,…	TTTGGATTGAAGGGAGCTCTA	149278	7885.8	95818	5666.81	74100	5202.01	74690	6234.49	73731	3917.02	58022	3711.25	166306	8875.59	42037	2995.46	194387	11058.2	35766	2054.6	70080	3435.43	86306	5129.69
mdm-miR1511MIMAT0026188,mdm-miR1511	ACCTAGCTCTGATACCATGAA	36555	1931.06	35340	2090.06	23276	1634.04	8144	679.79	23413	1243.83	20940	1339.38	40830	2179.06	16577	1181.24	50843	2892.33	20042	1151.32	29196	1431.23	12456	740.34
mdm-miR482bMIMAT0026022,mdm-miR482b	TCTTTCCTATCCCTCCCATTCC	17997	950.71	17863	1056.44	9450	663.41	10295	859.34	6298	334.59	6641	424.78	27725	1479.66	4279	304.91	32213	1832.52	5593	321.29	8637	423.4	4222	250.94
mdm-miR319aMIMAT0025967,mdm-miR319b-3pMIMAT0025968,aau-miR319,acb-miR159,aha-miR159,ahi-miR159,aly-miR319a-3p,aly-miR319b-3p,amg-miR319,ape-miR159,aqc-miR319,ath-miR319a,ath-miR319b,bra-miR319-3p,bvl-miR159,cca-miR319,cmi-miR159,cor-miR159,crb-miR159,dso-miR159,ech-miR159,fal-miR159,gma-miR319h,gma-miR319j,gma-miR319k,gma-miR319m,hbr-miR319,lus-miR319a,mdm-miR319a,mdm-miR319b,mes-miR319a,mes-miR3…	TTGGACTGAAGGGAGCTCCCT	16095	850.24	8992	531.8	6215	436.31	11823	986.88	8705	462.46	10212	653.19	13067	697.37	4492	320.09	12736	724.52	5444	312.73	6345	311.04	14185	843.1
mdm-miR482cMIMAT0026023,mdm-miR482c	TCTTTCCTAACCCTCCCATTCC	15867	838.19	18454	1091.39	8880	623.4	7812	652.08	6171	327.84	5714	365.48	20324	1084.67	3842	273.77	24190	1376.11	5489	315.32	8170	400.51	3568	212.07
cme-miR319c,cme-miR319d,ppl-miR319,ptc-miR319e,ptc-miR319f,ptc-miR319g,ptc-miR319h,stu-miR319b	TTGGACTGAAGGGAGCTCCT	8799	464.82	4395	259.93	3501	245.78	3601	300.58	5734	304.62	6149	393.31	9300	496.33	4680	333.49	10121	575.76	4315	247.88	5479	268.59	6102	362.68
mdm-miR159aMIMAT0025898,mdm-miR159bMIMAT0025899,cpa-miR159b,mdm-miR159a,mdm-miR159b,sit-miR110-npr	CTTGGATTGAAGGGAGCTCC	8700	459.59	2606	154.12	2034	142.79	11350	947.4	3864	205.28	2337	149.48	25534	1362.72	4972	354.29	22304	1268.82	7987	458.82	8867	434.67	21191	1259.51
cme-miR319a,cme-miR319b,ctr-miR319,gma-miR319a,gma-miR319b,gma-miR319e,ltu-miR319,lus-miR319b,mtr-miR319a-3p,mtr-miR319b-3p,ppe-miR319a,ptc-miR319a,ptc-miR319b,ptc-miR319c,ptc-miR319d,vun-miR319a.1,vun-miR319a.2	TTGGACTGAAGGGAGCTCCC	8608	454.73	5615	332.08	3726	261.57	7590	633.55	4119	218.83	4251	271.91	11904	635.3	2089	148.86	11514	655	3032	174.17	4200	205.89	4809	285.83
mdm-miR482dMIMAT0026039,mdm-miR482d	AATGGAAGGGTAGGAAAGAAG	6185	326.73	4331	256.14	3261	228.93	3144	262.43	3715	197.36	3037	194.26	6754	360.45	2834	201.94	7900	449.41	3210	184.4	5220	255.89	5835	346.81
mdm-miR396dMIMAT0025992,mdm-miR396eMIMAT0025993,mdm-miR396cMIMAT0025991,aly-miR396b-5p,aqc-miR396b,ath-miR396b,avm-miR396-5p,bcy-miR396b,bdi-miR396e-5p,bgy-miR396b,bna-miR396a,bra-miR396-5p,cca-miR396a-5p,ccl-miR396,cme-miR396a,cme-miR396c,cme-miR396d,gma-miR396b-5p,gma-miR396c,lus-miR396b,lus-miR396e,mdm-miR396c,mdm-miR396d,mdm-miR396e,mes-miR396c,mes-miR396d,mes-miR396e,mes-miR396f,mtr-miR396a-…	TTCCACAGCTTTCTTGAACTT	5114	270.15	4280	253.13	2870	201.48	945	78.88	2399	127.45	2252	144.04	3182	169.82	1176	83.8	2682	152.57	1480	85.02	2327	114.07	2077	123.45
mdm-miR171bMIMAT0025939,mdm-miR171aMIMAT0025938,mdm-miR171pMIMAT0043582,ctr-miR171,mdm-miR171a,mdm-miR171b,ppe-miR171h,sit-miR14-npr	TTGAGCCGCGTCAATATCTCC	5071	267.88	3051	180.44	2420	169.89	1808	150.92	1705	90.58	1519	97.16	8220	438.69	1426	101.61	10196	580.02	1652	94.9	2331	114.27	973	57.83
gma-miR166m,ptc-miRf10192-akr	CGGACCAGGCTTCATTCCCC	4764	251.66	3008	177.9	2698	189.41	2996	250.08	2556	135.79	2810	179.74	2988	159.47	1278	91.07	2257	128.4	1197	68.76	2032	99.61	4946	293.97
mdm-miR7120a-3pMIMAT0037472,mdm-miR7120b-3pMIMAT0037473	CAGTCTGACAATATAACGTGC	3802	200.85	2716	160.63	1897	133.17	2017	168.36	2106	111.88	1638	104.77	5383	287.29	1107	78.88	7134	405.84	1991	114.37	2282	111.87	1099	65.32
mdm-miR5225cMIMAT0026052,mdm-miR5225c	TCTGTCGTGGGTGAGATGGTGC	3174	167.67	1383	81.79	1615	113.38	1067	89.06	992	52.7	882	56.42	10286	548.95	1232	87.79	8893	505.9	3184	182.91	7324	359.03	5077	301.76
cme-miR166g,cpt-miR166,csi-miR166c,gma-miR166p,gma-miR166q,gma-miR166r,gma-miR166s,gma-miR166t,sbi-miR166a,sbi-miR166b,sbi-miR166c,sbi-miR166d,sbi-miR166h,sbi-miR166i,sbi-miR166j,tcc-miR166b,zma-miR166b-3p,zma-miR166c-3p,zma-miR166d-3p,zma-miR166e,zma-miR166f,zma-miR166g-3p,zma-miR166h-3p,zma-miR166i-3p,ghr-miR166h	TCGGACCAGGCTTCATTCCC	2540	134.18	1409	83.33	1698	119.2	3106	259.26	1343	71.35	1475	94.35	1370	73.12	685	48.81	1296	73.73	770	44.23	1240	60.79	3144	186.87
ath-miR858b	TTCGTTGTCTGTTCGACCTTG	1935	102.22	1055	62.39	755	53	733	61.18	718	38.14	484	30.96	3502	186.9	696	49.6	4812	273.74	1173	67.38	1143	56.03	602	35.78
mdm-miR319c-3pMIMAT0026058,mdm-miR319c	ATCCAACGAAGCAGGAGCTGA	1575	83.2	1120	66.24	803	56.37	862	71.95	1700	90.31	1216	77.78	1870	99.8	1056	75.25	2191	124.64	950	54.57	1019	49.95	1039	61.75
mdm-miR482a-3pMIMAT0011165,mdm-miR482a-3p	TTCCCAAGCCCGCCCATTCCTA	1544	81.56	2064	122.07	780	54.76	1553	129.63	731	38.83	482	30.83	1465	78.19	396	28.22	1642	93.41	374	21.48	614	30.1	769	45.71
mdm-miR394aMIMAT0025978,mdm-miR394bMIMAT0025979,ahy-miR394,aly-miR394a-5p,aly-miR394b-5p,ath-miR394a,ath-miR394b,bdi-miR394,bna-miR394a,bna-miR394b,cca-miR394,cme-miR394a,cme-miR394b,cpa-miR394a,cpa-miR394b,csi-miR394,gma-miR394a-5p,gma-miR394b-5p,gma-miR394c-5p,gma-miR394d,gma-miR394e,gma-miR394f,gma-miR394g,lus-miR394a,lus-miR394b,mdm-miR394a,mdm-miR394b,mes-miR394a,mes-miR394b,nta-miR394,osa-m…	TTGGCATTCTGTCCACCTCC	1169	61.75	1291	76.35	675	47.39	264	22.04	469	24.92	519	33.2	1270	67.78	196	13.97	1518	86.36	505	29.01	553	27.11	34	2.02
mdm-miR858MIMAT0026070,mdm-miR858	TTCGTTGTCTGTTCGACCTGA	1088	57.47	314	18.57	206	14.46	1431	119.45	335	17.8	149	9.53	3781	201.79	403	28.72	5555	316.01	309	17.75	533	26.13	304	18.07
mdm-miR167gMIMAT0025928,mdm-miR167cMIMAT0025924,mdm-miR167bMIMAT0025923,mdm-miR167fMIMAT0025927,mdm-miR167eMIMAT0025926,mdm-miR167dMIMAT0025925,aly-miR167a-5p,aly-miR167b-5p,ath-miR167a,ath-miR167b,bdi-miR167a,bdi-miR167b,bdi-miR167f,bna-miR167c,bra-miR167a,bra-miR167b,bra-miR167c,bra-miR167d,cme-miR167a,cme-miR167b,cpa-miR167a,cpa-miR167b,dpr-miR167a,dpr-miR167b,gma-miR167a,gma-miR167b,gma-miR16…	TGAAGCTGCCAGCATGATCTA	982	51.88	552	32.65	418	29.34	316	26.38	414	21.99	282	18.04	901	48.09	291	20.74	1246	70.88	382	21.94	497	24.36	224	13.31
mtr-miR4414a-5p	AGCTGCTGACTCGTTGGTTCA	953	50.34	596	35.25	409	28.71	1387	115.77	785	41.7	353	22.58	2786	148.69	743	52.94	4430	252.01	944	54.23	710	34.81	423	25.14
mdm-miR7121cMIMAT0026042,mdm-miR7121bMIMAT0026041,mdm-miR7121aMIMAT0026040,mdm-miR7121a,mdm-miR7121b,mdm-miR7121c	TCCTCTTGGTGATCGCCCTGT	944	49.87	668	39.51	276	19.38	537	44.82	411	21.83	322	20.6	1439	76.8	426	30.36	2001	113.83	367	21.08	321	15.74	453	26.92
mdm-miR7121eMIMAT0026044,mdm-miR7121dMIMAT0026043,mdm-miR7121hMIMAT0026047,mdm-miR7121gMIMAT0026046,mdm-miR7121fMIMAT0026045,mdm-miR7121d,mdm-miR7121e,mdm-miR7121f,mdm-miR7121g,mdm-miR7121h	TCCTCTTGGTGATCGCCCTGC	922	48.71	500	29.57	340	23.87	1107	92.4	387	20.56	314	20.08	2714	144.84	238	16.96	3067	174.47	306	17.58	391	19.17	267	15.87
sit-miR05-npr	TTTCGGACCAGGCTTCATTCC	915	48.34	619	36.61	466	32.71	1310	109.35	480	25.5	526	33.64	464	24.76	172	12.26	428	24.35	229	13.16	324	15.88	843	50.1
peu-miR2910	TAGTTGGTGGAGCGATTTGTC	861	45.48	525	31.05	254	17.83	429	35.81	391	20.77	507	32.43	1931	103.06	293	20.88	2291	130.33	396	22.75	645	31.62	662	39.35
mdm-miR396aMIMAT0025989,mdm-miR396a	TTCCACAGCTTTCTTGAACAG	784	41.42	580	34.3	422	29.63	619	51.67	254	13.49	405	25.9	517	27.59	175	12.47	479	27.25	149	8.56	267	13.09	510	30.31
mdm-miR393cMIMAT0025977,mdm-miR393bMIMAT0025976,mdm-miR393aMIMAT0025975,mdm-miR393a,mdm-miR393b,mdm-miR393c,mes-miR393c,mes-miR393d,osa-miR393b-5p,zma-miR393a-5p,zma-miR393c-5p,ghr-miR393f	TCCAAAGGGATCGCATTGATCT	779	41.15	591	34.95	382	26.82	394	32.89	423	22.47	371	23.73	725	38.69	134	9.55	779	44.32	179	10.28	272	13.33	347	20.62
cpa-miR166e	GGACCAGGCTTCATTCCCC	777	41.05	476	28.15	448	31.45	573	47.83	351	18.65	369	23.6	521	27.81	165	11.76	464	26.4	238	13.67	335	16.42	748	44.46
mdm-miR164cMIMAT0025909,mdm-miR164dMIMAT0025910,mdm-miR164eMIMAT0025911,mdm-miR164bMIMAT0025908,mdm-miR164fMIMAT0025912,aly-miR164a-5p,aly-miR164b-5p,ath-miR164a,ath-miR164b,bdi-miR164a-5p,bdi-miR164b,bdi-miR164e,bna-miR164a,bra-miR164a,cav-miR164,cme-miR164c,cme-miR164d,cpa-miR164a,cpa-miR164b,cpa-miR164c,csi-miR164,ctr-miR164,gma-miR164a,gma-miR164e,gma-miR164f,gma-miR164g,gma-miR164h,gma-miR16…	TGGAGAAGCAGGGCACGTGCA	739	39.04	793	46.9	403	28.29	159	13.27	459	24.38	293	18.74	706	37.68	179	12.76	995	56.6	90	5.17	190	9.31	207	12.3
mdm-miR2118bMIMAT0026035,mdm-miR2118cMIMAT0026036,mdm-miR2118aMIMAT0026034,mdm-miR2118a,mdm-miR2118b,mdm-miR2118c	CTACCGATGCCACTAAGTCCCA	662	34.97	750	44.36	332	23.31	206	17.2	255	13.55	270	17.27	441	23.54	159	11.33	952	54.16	341	19.59	562	27.55	162	9.63
mes-miR319h	CTTGGACTGAAGGGAGCTCCT	650	34.34	303	17.92	309	21.69	302	25.21	283	15.03	440	28.14	1065	56.84	457	32.56	1072	60.98	329	18.9	361	17.7	433	25.74
aly-miR159b-3p,ath-miR159b,lus-miR159c	TTTGGATTGAAGGGAGCTCTT	594	31.38	553	32.71	331	23.24	578	48.25	331	17.58	222	14.2	791	42.21	207	14.75	656	37.32	156	8.96	324	15.88	417	24.78
aqc-miR166a,aqc-miR166d,cme-miR166e,dpr-miR166a,ini-miR166,lus-miR166e,mes-miR166j,mtr-miR166c,mtr-miR166f,osa-miR166g-3p,osa-miR166h-3p,pab-miR166a,sbi-miR166f,sit-miR166c,sly-miR166c-3p,ssl-miR166a,stu-miR166b,tcc-miR166c,zma-miR166l-3p,zma-miR166m-3p	TCGGACCAGGCTTCATTCCTC	592	31.27	245	14.49	214	15.02	246	20.53	174	9.24	322	20.6	213	11.37	151	10.76	181	10.3	130	7.47	259	12.7	264	15.69
gma-miR396a-3p	TTCAATAAAGCTGTGGGAAG	557	29.42	295	17.45	242	16.99	524	43.74	283	15.03	279	17.85	1119	59.72	242	17.24	980	55.75	146	8.39	327	16.03	780	46.36
mdm-miR162aMIMAT0025905,mdm-miR162bMIMAT0025906,aau-miR162,aly-miR162a-3p,aly-miR162b-3p,ath-miR162a,ath-miR162b,bra-miR162-3p,cme-miR162,cpa-miR162a,csi-miR162,gma-miR162b,gma-miR162c,hpe-miR162a,htu-miR162a,llu-miR162,lsa-miR162,lus-miR162a,lus-miR162b,mdm-miR162a,mdm-miR162b,mes-miR162,mtr-miR162,nta-miR162a,nta-miR162b,osa-miR162a,pde-miR162,ppe-miR162,ptc-miR162a,ptc-miR162b,rco-miR162,sbi-m…	TCGATAAACCTCTGCATCCAG	551	29.11	365	21.59	267	18.74	186	15.53	348	18.49	297	19	203	10.83	138	9.83	239	13.6	112	6.43	300	14.71	390	23.18
csi-miR166d,osa-miR166m	TCGGACCAGGCTTCATTCCCT	550	29.05	254	15.02	222	15.58	275	22.95	210	11.16	288	18.42	246	13.13	145	10.33	214	12.17	112	6.43	229	11.23	337	20.03
cpa-miR166d,gma-miR166j-3p,ghr-miR166k	TCGGACCAGGCTTCATTCCCG	477	25.2	148	8.75	185	12.99	12	1	128	6.8	249	15.93	121	6.46	123	8.76	116	6.6	115	6.61	206	10.1	17	1.01
mdm-miR403aMIMAT0026011,mdm-miR403bMIMAT0026012,aly-miR403a-3p,aly-miR403b-3p,ath-miR403,bna-miR403,bra-miR403-3p,bst-miR403,csi-miR403,har-miR403a,hpe-miR403a,htu-miR403a,htu-miR403b,htu-miR403c,htu-miR403d,htu-miR403e,mdm-miR403a,mdm-miR403b,mes-miR403a,mes-miR403b,ppe-miR403,ppl-miR403,ptc-miR403a,ptc-miR403b,ptc-miR403c-3p,ptc-miR403d,rco-miR403a,rco-miR403b,tcc-miR403a,tcc-miR403b,vvi-miR403…	TTAGATTCACGCACAAACTCG	474	25.04	427	25.25	275	19.31	127	10.6	487	25.87	393	25.14	331	17.67	233	16.6	431	24.52	171	9.82	198	9.71	411	24.43
mes-miR166i,ghr-miR166i,gba-miR166aa,gba-miR166ab	TTGGACCAGGCTTCATTCCCC	455	24.04	289	17.09	213	14.95	357	29.8	194	10.31	218	13.94	258	13.77	130	9.26	190	10.81	125	7.18	173	8.48	592	35.19
ath-miR165a,ath-miR165b,bna-miR166f,flm-miR166,hce-miR165,lus-miR166b	TCGGACCAGGCTTCATCCCCC	392	20.71	226	13.37	246	17.27	355	29.63	171	9.08	187	11.96	243	12.97	104	7.41	188	10.69	87	5	127	6.23	417	24.78
sit-miR58-1-npr,sit-miR58-2-npr,sit-miR58-3-npr	TCGGACCAGGCTTCATTCCCCT	356	18.81	180	10.65	138	9.69	50	4.17	157	8.34	156	9.98	246	13.13	116	8.27	258	14.68	145	8.33	128	6.27	244	14.5
hbr-miR166a,pde-miR166a,pde-miR166b,vvi-miR166a,vvi-miR166b	TCGGACCAGGCTTCATTCC	343	18.12	291	17.21	303	21.27	291	24.29	197	10.47	166	10.62	437	23.32	128	9.12	342	19.46	242	13.9	436	21.37	903	53.67
mdm-miR396gMIMAT0025995,mdm-miR396fMIMAT0025994,cme-miR396e,mdm-miR396f,mdm-miR396g,ptc-miR396f	TTCCACGGCTTTCTTGAACTG	339	17.91	312	18.45	122	8.56	483	40.32	142	7.54	234	14.97	200	10.67	101	7.2	132	7.51	77	4.42	65	3.19	622	36.97
osa-miR166e-3p	TCGAACCAGGCTTCATTCCCC	316	16.69	210	12.42	190	13.34	317	26.46	131	6.96	178	11.39	194	10.35	70	4.99	175	9.96	97	5.57	131	6.42	415	24.67
mdm-miR390eMIMAT0025973,mdm-miR390aMIMAT0025969,mdm-miR390dMIMAT0025972,mdm-miR390cMIMAT0025971,mdm-miR390fMIMAT0025974,mdm-miR390bMIMAT0025970,aly-miR390a-5p,aly-miR390b-5p,ath-miR390a,ath-miR390b,bdi-miR390a-5p,bna-miR390a,bna-miR390b,bna-miR390c,bra-miR390-5p,cme-miR390a,cme-miR390b,cme-miR390c,cme-miR390d,cpa-miR390a,cpa-miR390b,csi-miR390,gma-miR390a-5p,gma-miR390f,gma-miR390g,hex-miR390a,he…	AAGCTCAGGAGGGATAGCGCC	297	15.69	191	11.3	161	11.3	79	6.59	85	4.52	216	13.82	215	11.47	171	12.19	294	16.72	480	27.57	710	34.81	560	33.28
bdi-miR167c-5p,bdi-miR167d-5p,bdi-miR167e-5p,bdi-miR167g,ccl-miR167a,ccl-miR167b,cpa-miR167d,ctr-miR167,gma-miR167g,mes-miR167d,mes-miR167e,mes-miR167f,ppe-miR167c,sit-miR167b-1,sit-miR167b-2,sit-miR167b-3,vun--miR167g	TGAAGCTGCCAGCATGATCTGA	273	14.42	175	10.35	169	11.86	82	6.84	163	8.66	94	6.01	187	9.98	56	3.99	227	12.91	59	3.39	105	5.15	32	1.9
mdm-miR535dMIMAT0026027,mdm-miR535d,ppe-miR535b	TGACGACGAGAGAGAGCACGC	273	14.42	159	9.4	126	8.85	38	3.17	138	7.33	202	12.92	279	14.89	80	5.7	430	24.46	82	4.71	174	8.53	0	0.01
pta-miR319	TTGGACTGAAGGGAGCTCC	223	11.78	77	4.55	81	5.69	269	22.45	111	5.9	149	9.53	249	13.29	78	5.56	463	26.34	73	4.19	129	6.32	117	6.95
aly-miR396a-3p,gma-miR396i-3p,mtr-miR396b-3p,sly-miR396a-3p,ghr-miR396a,ghr-miR396d,ghr-miR396e,ghr-miR396f,ghr-miR396j	GTTCAATAAAGCTGTGGGAAG	220	11.62	84	4.97	56	3.93	74	6.18	61	3.24	88	5.63	180	9.61	45	3.21	254	14.45	40	2.3	133	6.52	217	12.9
csi-miR166a,ctr-miR166,hbr-miR166b,lus-miR166i,lus-miR166k,sit-miR59-npr	TCGGACCAGGCTTCATTCCCCC	205	10.83	210	12.42	114	8	140	11.69	62	3.29	175	11.19	164	8.75	71	5.06	190	10.81	83	4.77	150	7.35	225	13.37
mdm-miR7126-5pMIMAT0026060,mdm-miR7126	AAAGTATCAAGGAGCGCAAAG	202	10.67	173	10.23	112	7.86	43	3.59	153	8.13	149	9.53	254	13.56	96	6.84	240	13.65	150	8.62	289	14.17	86	5.11
ptc-miR159d,sbi-miR159b,sof-miR159c,zma-miR159c-3p,zma-miR159d-3p	CTTGGATTGAAGGGAGCTCCT	202	10.67	80	4.73	102	7.16	112	9.35	100	5.31	90	5.76	230	12.27	152	10.83	230	13.08	261	14.99	509	24.95	653	38.81
mdm-miR7126-3pMIMAT0037475	TTGCGTTCCACTGATTCTTTCG	193	10.2	166	9.82	126	8.85	236	19.7	137	7.28	126	8.06	144	7.69	66	4.7	79	4.49	62	3.56	105	5.15	623	37.03
gma-miR156k,gma-miR156n,gma-miR156o,sit-miR156d-1,sit-miR156d-2	TTGACAGAAGAGAGTGAGCAC	188	9.93	77	4.55	132	9.27	52	4.34	65	3.45	84	5.37	169	9.02	73	5.2	203	11.55	54	3.1	127	6.23	25	1.49
mdm-miR171eMIMAT0025942,mdm-miR171cMIMAT0025940,mdm-miR171dMIMAT0025941,ace-miR170a,ace-miR170b,ace-miR170c,ace-miR170d,ace-miR171a,ace-miR171b,ace-miR171c,aly-miR171a-3p,ath-miR170m,ath-miR170n,ath-miR171a,ath-miR171m,ath-miR171n,ath-miR171o,bdi-miR171a,bna-miR171f,bra-miR171e,ccl-miR171,cme-miR171a,cme-miR171e,cme-miR171g,gcl-miR171,mdm-miR171c,mdm-miR171d,mdm-miR171e,osa-miR171a,ppd-miR170,sbi…	TGATTGAGCCGCGCCAATATC	159	8.4	63	3.73	72	5.05	15	1.25	31	1.65	63	4.03	251	13.4	68	4.85	448	25.49	93	5.34	165	8.09	50	2.97
mdm-miR159cMIMAT0026053,mdm-miR159c	GAATTCCTTCTCCTCTCCTTT	158	8.35	196	11.59	89	6.25	118	9.85	37	1.97	59	3.77	198	10.57	40	2.85	128	7.28	143	8.21	171	8.38	290	17.24
ptc-miR396e-3p	CTCAAGAAAGCTGTGGGAGA	154	8.14	77	4.55	46	3.23	29	2.42	45	2.39	16	1.02	254	13.56	22	1.57	524	29.81	109	6.26	113	5.54	2	0.12
cpa-miR319	ATTGGACTGAAGGGAGCTCC	153	8.08	46	2.72	87	6.11	188	15.69	99	5.26	87	5.56	301	16.06	194	13.82	301	17.12	170	9.77	130	6.37	259	15.39
aly-miR166a-5p,aly-miR166c-5p,aly-miR166d-5p,bdi-miR166e-5p,csi-miR166e*,gma-miR166a-5p,gma-miR166c-5p,gma-miR166l,mtr-miR166g-5p,osa-miR166d-5p,stu-miR166a-5p,vun-miR166c*.1,vun-miR166c*.2,vun-miR166c*.3,vun-miR166c*.4,zma-miR166c-5p	GGAATGTTGTCTGGCTCGAGG	133	7.03	214	12.66	178	12.5	90	7.51	69	3.67	92	5.88	89	4.75	126	8.98	122	6.94	47	2.7	125	6.13	294	17.47
vun-miR394a.1,vun-miR394a.3	TTTGGCATTCTGTCCACCTCC	133	7.03	152	8.99	83	5.83	39	3.26	33	1.75	97	6.2	189	10.09	21	1.5	236	13.43	50	2.87	102	5	0	0.01
mdm-miR168bMIMAT0025933,mdm-miR168aMIMAT0025932,aly-miR168a-5p,aly-miR168b-5p,ath-miR168a,ath-miR168b,ath-miR168m,bna-miR168a,bra-miR168a-5p,cca-miR168a,ccl-miR168,crt-miR168,gma-miR168a,hte-miR168,lus-miR168a,lus-miR168b,mdm-miR168a,mdm-miR168b,mes-miR168a,mtr-miR168b,mtr-miR168c-5p,nta-miR168d,nta-miR168e,ppe-miR168,ptc-miR168a-5p,ptc-miR168b-5p,ptr-miR168,pts-miR168a,pts-miR168b,rco-miR168,tcc…	TCGCTTGGTGCAGGTCGGGAA	128	6.76	63	3.73	38	2.67	83	6.93	16	0.85	75	4.8	27	1.44	33	2.35	84	4.78	10	0.57	34	1.67	153	9.09
mdm-miR171iMIMAT0025946,mdm-miR171i,sit-miR50-npr,stu-miR479	TGAGCCGAACCAATATCACTC	108	5.71	51	3.02	60	4.21	0	0.01	62	3.29	49	3.13	180	9.61	18	1.28	355	20.2	31	1.78	29	1.42	31	1.84
mdm-miR319dMIMAT0043552	AACTGCCGACTCATTCACTCA	105	5.55	70	4.14	59	4.14	32	2.67	69	3.67	89	5.69	204	10.89	121	8.62	141	8.02	35	2.01	116	5.69	64	3.8
lus-miR159b	TTTGGATTGAAGGGAGCTCTC	105	5.55	42	2.48	48	3.37	55	4.59	51	2.71	41	2.62	117	6.24	21	1.5	84	4.78	35	2.01	50	2.45	5	0.3
mdm-miR171jMIMAT0025947,mdm-miR171kMIMAT0025948,mdm-miR171lMIMAT0025949,gma-miR171k-3p,lja-miR171d-5p,mdm-miR171j,mdm-miR171k,mdm-miR171l,nta-miR171b,ppe-miR171b,ssl-miR171b,vun-miR171f,vvi-miR171f,ghr-miR171j,ghr-miR171k,gba-miR171d,gba-miR171e,gba-miR171f,gba-miR171g,gba-miR171h,gba-miR171i	TTGAGCCGCGCCAATATCACT	94	4.97	65	3.84	18	1.26	34	2.84	17	0.9	28	1.79	44	2.35	20	1.43	12	0.68	21	1.21	43	2.11	61	3.63
vvi-miR396b	TTCCACAGCTTTCTTGAACT	91	4.81	1	0.06	56	3.93	66	5.51	45	2.39	72	4.61	63	3.36	6	0.43	62	3.53	71	4.08	109	5.34	225	13.37
mdm-miR11011bMIMAT0043630	TAAGTTCATCCAAACACCATA	89	4.7	75	4.44	59	4.14	0	0.01	36	1.91	21	1.34	83	4.43	6	0.43	219	12.46	30	1.72	57	2.79	0	0.01
bdi-miR393a,bdi-miR393b-5p,bna-miR393,cme-miR393a,cme-miR393b,cme-miR393c,gma-miR393a,lus-miR393a,lus-miR393b,lus-miR393c,lus-miR393d,mtr-miR393a,mtr-miR393b-5p,osa-miR393a,ppe-miR393b,ptc-miR393a-5p,ptc-miR393b-5p,ptc-miR393c,rco-miR393,sbi-miR393a,sbi-miR393b,tcc-miR393b,vvi-miR393a,vvi-miR393b	TCCAAAGGGATCGCATTGATC	76	4.01	50	2.96	12	0.84	62	5.18	6	0.32	2	0.13	203	10.83	8	0.57	306	17.41	11	0.63	30	1.47	28	1.66
mdm-miR396bMIMAT0025990,aau-miR396,aly-miR396a-5p,amg-miR396,aqc-miR396a,ath-miR396a,bcy-miR396a,bdi-miR396c-5p,bdi-miR396d-5p,bgy-miR396a,cme-miR396b,cpa-miR396,csi-miR396a,csi-miR396b,dpr-miR396,gma-miR396a-5p,gma-miR396i-5p,hbr-miR396b,lja-miR396,lus-miR396a,lus-miR396c,mdm-miR396b,mes-miR396a,mes-miR396b,mtr-miR396b-5p,nta-miR396a,osa-miR396a-5p,osa-miR396b-5p,ptc-miR396a,ptc-miR396b,sbi-miR3…	TTCCACAGCTTTCTTGAACTG	72	3.8	40	2.37	59	4.14	153	12.77	17	0.9	17	1.09	40	2.13	13	0.93	42	2.39	42	2.41	30	1.47	278	16.52
osa-miR159f	CTTGGATTGAAGGGAGCTCTA	65	3.43	26	1.54	24	1.68	111	9.27	39	2.07	35	2.24	69	3.68	23	1.64	53	3.02	11	0.63	33	1.62	12	0.71
bdi-miR166f,gma-miR166h-3p,gma-miR166k,sit-miR166b-1,sit-miR166b-2,sit-miR166b-3,vun-miR166b.2,vun-miR166b.3,ghr-miR166f,ghr-miR166g,gba-miR166w,gba-miR166x,gba-miR166y,gba-miR166z	TCTCGGACCAGGCTTCATTCC	63	3.33	16	0.95	8	0.56	134	11.19	32	1.7	20	1.28	28	1.49	6	0.43	16	0.91	24	1.38	50	2.45	102	6.06
sit-miR60-npr	TCGGACCAGGCTTCATTCCCCA	62	3.28	24	1.42	21	1.47	40	3.34	51	2.71	7	0.45	68	3.63	29	2.07	37	2.1	8	0.46	37	1.81	27	1.6
bdi-miR159b-3p.1,far-miR159,hvu-miR159a,hvu-miR159b,oru-miR159,osa-miR159a.1,osa-miR159b,pgl-miR159,sar-miR159,sbi-miR159a,sof-miR159a,sof-miR159b,sof-miR159d,spr-miR159,ssp-miR159a,tae-miR159a,tae-miR159b,zma-miR159a-3p,zma-miR159b-3p,zma-miR159f-3p,zma-miR159j-3p,zma-miR159k-3p	TTTGGATTGAAGGGAGCTCTG	58	3.06	14	0.83	31	2.18	10	0.83	20	1.06	16	1.02	32	1.71	14	1	45	2.56	18	1.03	38	1.86	8	0.48
mdm-miR10984b-3pMIMAT0043610	CTCACGTACGCTGTCCCGAGAA	56	2.96	70	4.14	38	2.67	35	2.92	27	1.43	30	1.92	32	1.71	14	1	38	2.16	20	1.15	24	1.18	81	4.81
aqc-miR159	TTTGGACTGAAGGGAGCTCTA	52	2.75	16	0.95	15	1.05	4	0.33	15	0.8	19	1.22	33	1.76	15	1.07	28	1.59	17	0.98	21	1.03	2	0.12
ppt-miR319c,ppt-miR319d-3p,ppt-miR319e	CTTGGACTGAAGGGAGCTCCC	52	2.75	7	0.41	5	0.35	0	0.01	2	0.11	27	1.73	44	2.35	9	0.64	169	9.61	23	1.32	34	1.67	54	3.21
mdm-miR11005MIMAT0043604	CTACTATATGGTCGTACACATC	51	2.69	52	3.08	40	2.81	93	7.76	27	1.43	17	1.09	125	6.67	24	1.71	241	13.71	68	3.91	34	1.67	46	2.73
bna-miR167d,lja-miR167a,lja-miR167b,lja-miR167c,gba-miR167a,gba-miR167b,gba-miR167c	TGAAGCTGCCAGCATGATCT	51	2.69	44	2.6	42	2.95	0	0.01	81	4.3	18	1.15	24	1.28	23	1.64	0	0.01	32	1.84	50	2.45	41	2.44
mdm-miR11015MIMAT0043624	TGGGTAAAATGACCCAACCTG	47	2.48	9	0.53	51	3.58	32	2.67	51	2.71	16	1.02	13	0.69	10	0.71	41	2.33	12	0.69	38	1.86	0	0.01
mdm-miR11011aMIMAT0043613	AAGTTCATTCAAACACCATGT	46	2.43	0	0.01	2	0.14	0	0.01	11	0.58	5	0.32	24	1.28	10	0.71	8	0.46	9	0.52	12	0.59	49	2.91
mdm-miR10982cMIMAT0043537,mdm-miR10982aMIMAT0043535,mdm-miR10982bMIMAT0043536,mdm-miR10982dMIMAT0043538	CGGAATGAAGCTTACGAGAATG	42	2.22	20	1.18	28	1.97	32	2.67	34	1.81	44	2.81	15	0.8	22	1.57	13	0.74	24	1.38	11	0.54	27	1.6
mdm-miR399iMIMAT0026009,mdm-miR399jMIMAT0026010,aly-miR399b-3p,aly-miR399c-3p,ath-miR399b,ath-miR399c,csi-miR399d,gma-miR399a,gma-miR399b,gma-miR399c,gma-miR399h,mdm-miR399i,mdm-miR399j,mes-miR399f,mtr-miR399l,mtr-miR399p,osa-miR399d,pvu-miR399a,rco-miR399a,sbi-miR399d,sbi-miR399i,sit-miR399b-1,sit-miR399b-2,tcc-miR399i,vvi-miR399b,vvi-miR399c,zma-miR399e-3p,zma-miR399i-3p,zma-miR399j-3p,ghr-miR3…	TGCCAAAGGAGAGTTGCCCTG	42	2.22	28	1.66	24	1.68	29	2.42	52	2.76	20	1.28	78	4.16	3	0.21	53	3.02	17	0.98	23	1.13	0	0.01
mdm-miR156eMIMAT0025871,mdm-miR156mMIMAT0025879,mdm-miR156iMIMAT0025875,mdm-miR156bMIMAT0025868,mdm-miR156hMIMAT0025874,mdm-miR156lMIMAT0025878,mdm-miR156nMIMAT0025880,mdm-miR156fMIMAT0025872,mdm-miR156jMIMAT0025876,mdm-miR156cMIMAT0025869,mdm-miR156gMIMAT0025873,mdm-miR156aMIMAT0025867,mdm-miR156dMIMAT0025870,mdm-miR156oMIMAT0025881,mdm-miR156kMIMAT0025877,aly-miR156a-5p,aly-miR156b-5p,aly-miR15…	TGACAGAAGAGAGTGAGCAC	42	2.22	17	1.01	51	3.58	0	0.01	32	1.7	4	0.26	93	4.96	28	2	105	5.97	31	1.78	47	2.3	35	2.08
aly-miR319c-3p,aly-miR319d-3p,ath-miR319c,mes-miR319f,mes-miR319g,pvu-miR319c,rco-miR319d,sly-miR319c-3p,ghr-miR319c	TTGGACTGAAGGGAGCTCCTT	42	2.22	13	0.77	42	2.95	44	3.67	15	0.8	20	1.28	104	5.55	25	1.78	135	7.68	35	2.01	38	1.86	79	4.7
mdm-miR7124aMIMAT0026054,mdm-miR7124bMIMAT0026055,mdm-miR7124a,mdm-miR7124b	CACCAATATCAACTTTATTTG	39	2.06	22	1.3	19	1.33	0	0.01	28	1.49	10	0.64	83	4.43	12	0.86	43	2.45	38	2.18	14	0.69	73	4.34
mdm-miR7122aMIMAT0026048,mdm-miR7122bMIMAT0026049,mdm-miR7122a,mdm-miR7122b	TTATACAGAGAAATCACGGTCG	39	2.06	8	0.47	0	0.01	69	5.76	11	0.58	21	1.34	41	2.19	3	0.21	44	2.5	41	2.36	19	0.93	57	3.39
sit-miR21-1-npr,sit-miR21-2-npr	TTCGGACCAGGCTTCATTCCCC	38	2.01	33	1.95	41	2.88	1	0.08	2	0.11	40	2.56	28	1.49	4	0.29	17	0.97	8	0.46	11	0.54	80	4.75
mdm-miR477bMIMAT0026020,mdm-miR477b	ACTCTCCCTCAAGGGCTTCGAC	37	1.95	72	4.26	70	4.91	43	3.59	29	1.54	33	2.11	34	1.81	10	0.71	134	7.62	14	0.8	8	0.39	0	0.01
pab-miR396b,pab-miR396c,ptc-miR396g-5p,tcc-miR396d,ghr-miR396i	TTCCACGGCTTTCTTGAACTT	36	1.9	21	1.24	1	0.07	0	0.01	15	0.8	13	0.83	37	1.97	4	0.29	13	0.74	18	1.03	17	0.83	1	0.06
ppe-miR858	CTCGTTGTCTGTTCGACCTTG	31	1.64	0	0.01	16	1.12	0	0.01	21	1.12	4	0.26	71	3.79	12	0.86	156	8.87	97	5.57	81	3.97	74	4.4
mdm-miR156tMIMAT0025886,mdm-miR156uMIMAT0025887,mdm-miR156vMIMAT0025888,mdm-miR156wMIMAT0025889,ahy-miR156c,ahy-miR157k,ath-miR157m,can-miR157,far-miR156b,lsa-miR157,mdm-miR156t,mdm-miR156u,mdm-miR156v,mdm-miR156w,nbe-miR157a,nbe-miR157b,pam-miR157,par-miR157,pts-miR157,sin-miR157,vun-miR156f,zel-miR157,gba-miR156r,gba-miR156s	TTGACAGAAGAGAGAGAGCAC	31	1.64	34	2.01	14	0.98	0	0.01	14	0.74	2	0.13	25	1.33	12	0.86	46	2.62	25	1.44	7	0.34	10	0.59
mdm-miR482a-5pMIMAT0011164,mdm-miR482a-5p	AGGAATGGGCTGTTTGGGAAGA	31	1.64	39	2.31	8	0.56	50	4.17	67	3.56	26	1.66	45	2.4	67	4.77	66	3.75	35	2.01	15	0.74	0	0.01
ahy-miR167-5p,cme-miR167c,cpa-miR167c,csi-miR167b,gma-miR167e,gma-miR167f,lus-miR167b,mes-miR167g,mes-miR167h,pco-miR167,ptc-miR167f-5p,ptc-miR167g-5p,tcc-miR167c,ghr-miR167b,gba-miR167o,gba-miR167p,gba-miR167q	TGAAGCTGCCAGCATGATCTT	31	1.64	25	1.48	17	1.19	0	0.01	16	0.85	21	1.34	20	1.07	16	1.14	35	1.99	6	0.34	11	0.54	25	1.49
aqc-miR166c,sbi-miR166k	TCGGACCAGGCTTCATTCCT	28	1.48	1	0.06	0	0.01	3	0.25	0	0.01	9	0.58	25	1.33	12	0.86	30	1.71	5	0.29	34	1.67	66	3.92
mdm-miR827MIMAT0026028,mdm-miR827	TTAGATGACCATCAACGAACA	27	1.43	37	2.19	17	1.19	0	0.01	19	1.01	7	0.45	17	0.91	8	0.57	28	1.59	13	0.75	41	2.01	63	3.74
mdm-miR3627bMIMAT0026017,mdm-miR3627cMIMAT0026018,mdm-miR3627aMIMAT0026016,mdm-miR3627a,mdm-miR3627b,mdm-miR3627c	TCGCAGGAGAGATGGCACTA	26	1.37	0	0.01	20	1.4	35	2.92	0	0.01	14	0.9	0	0.01	0	0.01	0	0.01	1	0.06	9	0.44	0	0.01
mdm-miR391MIMAT0026019,mdm-miR391	TACGCAGGAGAGATGACGCCG	25	1.32	39	2.31	34	2.39	55	4.59	7	0.37	20	1.28	31	1.65	19	1.35	138	7.85	72	4.14	119	5.83	0	0.01
gba-miR403a,gba-miR403b	TTAGATTCACGCACAAACT	25	1.32	44	2.6	36	2.53	0	0.01	1	0.05	29	1.85	31	1.65	0	0.01	34	1.93	8	0.46	30	1.47	26	1.55
mdm-miR319hMIMAT0043595,mdm-miR319c-5pMIMAT0037474	GAGCTCTTCTTCAGTCCAGTCC	24	1.27	14	0.83	3	0.21	0	0.01	0	0.01	15	0.96	28	1.49	0	0.01	20	1.14	1	0.06	3	0.15	0	0.01
mdm-miR5225aMIMAT0026056,mdm-miR5225bMIMAT0026057,mdm-miR5225a,mdm-miR5225b	TCTGTCGAAGGTGAGATGGTGC	24	1.27	0	0.01	1	0.07	32	2.67	16	0.85	7	0.45	3	0.16	0	0.01	1	0.06	0	0.01	1	0.05	16	0.95
psi-miR159	CTTGGATTGAAGGGAGCTCCA	24	1.27	27	1.6	18	1.26	50	4.17	35	1.86	6	0.38	111	5.92	24	1.71	44	2.5	38	2.18	46	2.25	0	0.01
mdm-miR7120b-5pMIMAT0026038,mdm-miR7120a-5pMIMAT0026037,mdm-miR7120a,mdm-miR7120b	TGTTATATTGTCAGATTGTCA	22	1.16	20	1.18	6	0.42	39	3.26	39	2.07	26	1.66	134	7.15	24	1.71	146	8.31	52	2.99	34	1.67	27	1.6
mdm-miR535bMIMAT0026025,mdm-miR535cMIMAT0026026,mdm-miR535b,mdm-miR535c	TGACAAGGAGAGAGAGCACGC	21	1.11	61	3.61	20	1.4	0	0.01	19	1.01	30	1.92	43	2.29	43	3.06	81	4.61	15	0.86	21	1.03	0	0.01
mdm-miR11014MIMAT0043623	CGACCATTCATGAAAACTGCC	20	1.06	41	2.42	26	1.83	28	2.34	41	2.18	18	1.15	9	0.48	8	0.57	51	2.9	0	0.01	15	0.74	71	4.22
mdm-miR408cMIMAT0026032,mdm-miR408dMIMAT0026033,mdm-miR408bMIMAT0026031,mdm-miR408b,mdm-miR408c,mdm-miR408d	ACAGGGAAGAGGTAGAGCATG	19	1	7	0.41	13	0.91	28	2.34	1	0.05	0	0.01	5	0.27	5	0.36	0	0.01	27	1.55	16	0.78	0	0.01
ath-miR167m,cme-miR167d,cme-miR167f,csi-miR167a,csi-miR167c,dpr-miR167c,gma-miR167c,gma-miR167j,gso-miR167a,ini-miR167,lja-miR167,lus-miR167f,lus-miR167g,lus-miR167i,mes-miR167a,mtr-miR167b-5p,osa-miR167d-5p,osa-miR167e-5p,osa-miR167f,osa-miR167g,osa-miR167h-5p,osa-miR167i-5p,osa-miR167j,ppl-miR167b,ptc-miR167e,pts-miR167,sbi-miR167c,sbi-miR167d,sbi-miR167e,sbi-miR167f,sbi-miR167g,sbi-miR167h,sit…	TGAAGCTGCCAGCATGATCTG	19	1	31	1.83	18	1.26	24	2	0	0.01	23	1.47	8	0.43	13	0.93	13	0.74	37	2.13	37	1.81	1	0.06
mdm-miR7125MIMAT0026059,mdm-miR7125,ppe-miR7125-3p	CGAACTTATTGCAACTAGCTT	17	0.9	24	1.42	9	0.63	0	0.01	0	0.01	0	0.01	0	0.01	0	0.01	18	1.02	1	0.06	6	0.29	0	0.01
bdi-miR166h-3p,osa-miR166k-3p,osa-miR166l-3p,sbi-miR166e,sbi-miR166g,sit-miR166d,zma-miR166j-3p,zma-miR166k-3p,zma-miR166n-3p	TCGGACCAGGCTTCAATCCCT	17	0.9	6	0.35	5	0.35	0	0.01	3	0.16	8	0.51	7	0.37	5	0.36	3	0.17	2	0.11	5	0.25	0	0.01
gma-miR396b-3p,gma-miR396k,mtr-miR396a-3p,vun-miR396b*,ghr-miR396b,ghr-miR396c	GCTCAAGAAAGCTGTGGGAGA	14	0.74	0	0.01	0	0.01	0	0.01	0	0.01	6	0.38	8	0.43	0	0.01	15	0.85	1	0.06	3	0.15	0	0.01
mdm-miR172mMIMAT0025964,mdm-miR172oMIMAT0025966,mdm-miR172nMIMAT0025965,aly-miR172c-3p,aly-miR172d-3p,aly-miR172f-3p,ath-miR172c,ath-miR172d,bna-miR172d,bra-miR172c-3p,cme-miR172e,lja-miR172a,mdm-miR172m,mdm-miR172n,mdm-miR172o,nta-miR172a,ghr-miR172e,ghr-miR172h,gba-miR172e,gba-miR172f,gba-miR172g,gba-miR172h,gba-miR172i	AGAATCTTGATGATGCTGCAG	14	0.74	21	1.24	19	1.33	0	0.01	13	0.69	12	0.77	40	2.13	10	0.71	53	3.02	14	0.8	4	0.2	0	0.01
ghr-miR2911	GCCGGCCGGGGGACGGACTGGG	14	0.74	8	0.47	10	0.7	0	0.01	0	0.01	0	0.01	0	0.01	0	0.01	0	0.01	0	0.01	0	0.01	0	0.01
lus-miR167a,vvi-miR167c	TGAAGCTGCCAGCATGATCTC	13	0.69	12	0.71	21	1.47	0	0.01	0	0.01	1	0.06	10	0.53	5	0.36	39	2.22	22	1.26	10	0.49	0	0.01
mtr-miR319c-3p,vvi-miR319g	TTGGACTGAAGGGAGCTCCCA	12	0.63	1	0.06	4	0.28	3	0.25	7	0.37	8	0.51	2	0.11	5	0.36	5	0.28	0	0.01	2	0.1	1	0.06
mdm-miR156acMIMAT0025895,mdm-miR156abMIMAT0025894,ahy-miR156b-5p,ahy-miR157a-5p,aly-miR157a-5p,aly-miR157b-5p,aly-miR157c-5p,ath-miR157a,ath-miR157b,ath-miR157c,bna-miR156b,bna-miR156c,bna-miR156g,bol-miR157a,bra-miR157a,cca-miR156c,cme-miR156b,cpa-miR156e,cpa-miR156f,gma-miR156c,gma-miR156d,gma-miR156e,gma-miR156i,gma-miR156j,gma-miR156l,gma-miR156m,gra-miR157a,gra-miR157b,han-miR156c,lus-miR156…	TTGACAGAAGATAGAGAGCAC	12	0.63	11	0.65	0	0.01	0	0.01	26	1.38	7	0.45	37	1.97	9	0.64	18	1.02	6	0.34	14	0.69	26	1.55
bdi-miR159a-3p	CTTGGATTGAAGGGAGCTCT	11	0.58	19	1.12	25	1.76	1	0.08	1	0.05	4	0.26	66	3.52	25	1.78	73	4.15	32	1.84	52	2.55	1	0.06
mdm-miR395lMIMAT0043626	CTGAAGTGTTTGGGGGAACCC	11	0.58	15	0.89	8	0.56	1	0.08	0	0.01	0	0.01	50	2.67	0	0.01	28	1.59	22	1.26	22	1.08	67	3.98
mdm-miR10994-3pMIMAT0043573	TGCTTTTTTCTTGACCATAGC	10	0.53	0	0.01	8	0.56	0	0.01	0	0.01	9	0.58	11	0.59	4	0.29	25	1.42	7	0.4	11	0.54	0	0.01
osa-miRf10461-npr,zma-miR171b-3p	TTGAGCCGTGCCAATATCAC	10	0.53	0	0.01	6	0.42	0	0.01	14	0.74	8	0.51	0	0.01	1	0.07	0	0.01	0	0.01	2	0.1	0	0.01
mdm-miR11004MIMAT0043603	GTATTCTTTCATCTTCTACTA	10	0.53	0	0.01	0	0.01	0	0.01	0	0.01	11	0.7	30	1.6	2	0.14	13	0.74	3	0.17	0	0.01	0	0.01
pta-miR159c,smo-miR159	CTTGGATTGAAGGGAGCTCCC	9	0.48	0	0.01	1	0.07	29	2.42	0	0.01	1	0.06	9	0.48	8	0.57	23	1.31	1	0.06	9	0.44	0	0.01
sly-miR482e-5p	TGTGGGTGGGGTGGAAAGATT	8	0.42	9	0.53	0	0.01	0	0.01	0	0.01	0	0.01	0	0.01	0	0.01	20	1.14	0	0.01	0	0.01	0	0.01
gma-miR319c	TTGGACTGAAAGGAGCTCCT	7	0.37	0	0.01	0	0.01	0	0.01	0	0.01	2	0.13	1	0.05	2	0.14	0	0.01	2	0.11	0	0.01	0	0.01
mdm-miR398cMIMAT0026000,mdm-miR398bMIMAT0025999,aqc-miR398b,bdi-miR398a,cca-miR398,cme-miR398a,gma-miR398c,gma-miR398d,lus-miR398a,mdm-miR398b,mdm-miR398c,mtr-miR398b,mtr-miR398c,nta-miR398,osa-miR398b,ppe-miR398a-3p,ptc-miR398b,ptc-miR398c-3p,rco-miR398b,tcc-miR398a,vvi-miR398b,vvi-miR398c,ghr-miR398a	TGTGTTCTCAGGTCGCCCCTG	7	0.37	0	0.01	0	0.01	32	2.67	33	1.75	0	0.01	9	0.48	10	0.71	0	0.01	22	1.26	0	0.01	0	0.01
gma-miR396e	TTCCACAGCTTTCTTGAACTGT	6	0.32	0	0.01	0	0.01	0	0.01	0	0.01	0	0.01	0	0.01	0	0.01	0	0.01	0	0.01	0	0.01	0	0.01
osa-miR5083	AGACTACAATTATCTGATCA	6	0.32	0	0.01	0	0.01	0	0.01	0	0.01	0	0.01	0	0.01	0	0.01	0	0.01	0	0.01	0	0.01	0	0.01
gma-miR6300	GTCGTTGTAGTATAGTGG	6	0.32	0	0.01	0	0.01	0	0.01	17	0.9	0	0.01	0	0.01	0	0.01	0	0.01	0	0.01	7	0.34	0	0.01
aly-miR168a-3p,bra-miR168b-3p,bra-miR168c-3p,mtr-miR168c-3p,ptc-miR168a-3p,ptc-miR168b-3p,sly-miR168b-3p	CCCGCCTTGCATCAACTGAAT	6	0.32	0	0.01	0	0.01	0	0.01	0	0.01	0	0.01	0	0.01	0	0.01	0	0.01	0	0.01	0	0.01	0	0.01
mdm-miR160dMIMAT0025903,mdm-miR160aMIMAT0025900,mdm-miR160cMIMAT0025902,mdm-miR160eMIMAT0025904,mdm-miR160bMIMAT0025901,aly-miR160a-5p,aly-miR160b-5p,aly-miR160c-5p,aqc-miR160b,ath-miR160a,ath-miR160b,ath-miR160c,bdi-miR160a-5p,bdi-miR160b-5p,bdi-miR160c-5p,bdi-miR160d-5p,bna-miR160a,bna-miR160b,bna-miR160c,bna-miR160d,bra-miR160a-5p,cca-miR160b,cme-miR160a,cme-miR160b,cme-miR160c,cpa-miR160a,cpa…	TGCCTGGCTCCCTGTATGCCA	6	0.32	0	0.01	12	0.84	30	2.5	31	1.65	3	0.19	6	0.32	1	0.07	15	0.85	16	0.92	6	0.29	0	0.01
ghr-miR167c,gba-miR167k,gba-miR167l,gba-miR167m,gba-miR167n	TGAAGCTGCCAGCATGATCTAG	5	0.26	0	0.01	6	0.42	0	0.01	0	0.01	0	0.01	0	0.01	0	0.01	14	0.8	0	0.01	0	0.01	0	0.01
mdm-miR10998MIMAT0043585	CTTGGGATTCAGTCTAGGACTT	5	0.26	0	0.01	0	0.01	0	0.01	14	0.74	8	0.51	0	0.01	3	0.21	16	0.91	0	0.01	0	0.01	0	0.01
aly-miR167b-3p	GGTCATGCTCTGACAGCCTCACT	5	0.26	0	0.01	0	0.01	0	0.01	0	0.01	0	0.01	0	0.01	0	0.01	0	0.01	0	0.01	3	0.15	0	0.01
sly-miR166c-5p	GGGATGTTGTCTGGCTCGACA	5	0.26	0	0.01	0	0.01	0	0.01	0	0.01	0	0.01	0	0.01	0	0.01	0	0.01	0	0.01	0	0.01	0	0.01
mdm-miR169oMIMAT0043632	TAGCCAGGGATGACTTGCCT	5	0.26	0	0.01	0	0.01	0	0.01	0	0.01	0	0.01	0	0.01	0	0.01	0	0.01	0	0.01	0	0.01	0	0.01
aly-miR159c-3p,ath-miR159c	TTTGGATTGAAGGGAGCTCCT	5	0.26	0	0.01	0	0.01	0	0.01	0	0.01	0	0.01	0	0.01	0	0.01	0	0.01	0	0.01	0	0.01	0	0.01
mdm-miR169fMIMAT0026068,mdm-miR169eMIMAT0026067,mdm-miR169e,mdm-miR169f	TGAAGAGAAGAGCGTTGTTTGG	5	0.26	0	0.01	0	0.01	0	0.01	0	0.01	0	0.01	0	0.01	0	0.01	0	0.01	0	0.01	1	0.05	0	0.01
ptc-miR319i	TTGGGCTGAAGGGAGCTCCC	5	0.26	3	0.18	2	0.14	4	0.33	2	0.11	0	0.01	5	0.27	0	0.01	4	0.23	2	0.11	2	0.1	3	0.18
csi-miR162*	TGGAGGCAGCGGTTCATCGATC	5	0.26	37	2.19	4	0.28	0	0.01	0	0.01	8	0.51	0	0.01	8	0.57	16	0.91	10	0.57	16	0.78	0	0.01
pab-miR396a,vvi-miR396a	TTCCACAGCTTTCTTGAACTA	4	0.21	1	0.06	0	0.01	0	0.01	0	0.01	11	0.7	0	0.01	0	0.01	0	0.01	1	0.06	0	0.01	0	0.01
mdm-miR11001MIMAT0043599	TACAAAGATGGACTCCACCCTA	4	0.21	0	0.01	0	0.01	0	0.01	0	0.01	0	0.01	0	0.01	0	0.01	0	0.01	0	0.01	0	0.01	0	0.01
gma-miR168b	TCGCTTGGTGCAGGTCGGG	4	0.21	0	0.01	0	0.01	0	0.01	0	0.01	0	0.01	0	0.01	0	0.01	14	0.8	0	0.01	0	0.01	0	0.01
mdm-miR167jMIMAT0025931,mdm-miR167iMIMAT0025930,mdm-miR167hMIMAT0025929,mdm-miR167h,mdm-miR167i,mdm-miR167j,ppe-miR167d,vun-miR167f	TGAAGCTGCCAGCATGATCTTA	4	0.21	24	1.42	2	0.14	0	0.01	0	0.01	10	0.64	0	0.01	0	0.01	0	0.01	13	0.75	0	0.01	0	0.01
mdm-miR11010MIMAT0043612	AGTAACTATAGCTGTTTTCTA	4	0.21	0	0.01	0	0.01	0	0.01	0	0.01	0	0.01	0	0.01	0	0.01	18	1.02	0	0.01	0	0.01	0	0.01
aly-miR393a-5p,aly-miR393b-5p,ath-miR393a,ath-miR393b,cpa-miR393,gma-miR393c,gma-miR393d,gma-miR393e,gma-miR393f,gma-miR393g,htu-miR393a,htu-miR393b,htu-miR393c,mes-miR393a,mes-miR393b,stu-miR393-5p,tcc-miR393a,vun-miR393a.1,vun-miR393a.2,zma-miR393b-5p,ghr-miR393c	TCCAAAGGGATCGCATTGATCC	3	0.16	0	0.01	0	0.01	0	0.01	0	0.01	0	0.01	0	0.01	0	0.01	0	0.01	0	0.01	0	0.01	0	0.01
aly-miR165a-3p,aly-miR165b-3p	TCGGACCAGGCTTCATCCCC	3	0.16	1	0.06	0	0.01	2	0.17	1	0.05	3	0.19	0	0.01	7	0.5	0	0.01	5	0.29	9	0.44	4	0.24
gma-miR390b-5p,gma-miR390d,nta-miR390a,sly-miR390a-5p,stu-miR390-5p,vun-miR390a.2	AAGCTCAGGAGGGATAGCACC	3	0.16	0	0.01	0	0.01	0	0.01	0	0.01	1	0.06	0	0.01	0	0.01	0	0.01	1	0.06	3	0.15	0	0.01
mdm-miR535aMIMAT0026024,cpa-miR535,mdm-miR535a,osa-miR535-5p,pab-miR535,ppe-miR535a,ppt-miR535a,ppt-miR535b,ppt-miR535c,ppt-miR535d,rco-miR535,sit-miR535,vvi-miR535a,vvi-miR535b,vvi-miR535c	TGACAACGAGAGAGAGCACGC	3	0.16	0	0.01	0	0.01	0	0.01	0	0.01	0	0.01	0	0.01	0	0.01	0	0.01	13	0.75	3	0.15	0	0.01
aly-miR166g-5p,gma-miR166h-5p,gma-miR166j-5p,stu-miR166c-5p	GGAATGTTGTTTGGCTCGAGG	3	0.16	14	0.83	0	0.01	0	0.01	18	0.96	0	0.01	0	0.01	3	0.21	0	0.01	0	0.01	5	0.25	0	0.01
cme-miR166i	TCGGACCAGGCTTCATTCTC	3	0.16	0	0.01	0	0.01	1	0.08	2	0.11	0	0.01	0	0.01	0	0.01	0	0.01	1	0.06	3	0.15	1	0.06
bdi-miR166e-3p	CTCGGACCAGGCTTCATTCCC	3	0.16	9	0.53	3	0.21	2	0.17	1	0.05	1	0.06	0	0.01	4	0.29	3	0.17	2	0.11	5	0.25	1	0.06
cme-miR168	TCGCTTGGTGCAGGTCGGGA	2	0.11	0	0.01	0	0.01	0	0.01	0	0.01	0	0.01	0	0.01	2	0.14	0	0.01	0	0.01	0	0.01	0	0.01
bna-miR171g	TGATTGAGCCGCGCCAATATCT	2	0.11	0	0.01	0	0.01	0	0.01	0	0.01	0	0.01	12	0.64	0	0.01	0	0.01	3	0.17	6	0.29	0	0.01
ppe-miR396a	TTCCACAGCTTTCTTGAACGT	2	0.11	0	0.01	0	0.01	0	0.01	0	0.01	1	0.06	1	0.05	0	0.01	1	0.06	1	0.06	0	0.01	0	0.01
gma-miR171m,gma-miR171t,vun-miR171.2	TTGAGCCGCGTCAATATCTCA	2	0.11	1	0.06	0	0.01	0	0.01	1	0.05	2	0.13	2	0.11	0	0.01	4	0.23	0	0.01	0	0.01	0	0.01
mdm-miR171f-3pMIMAT0025943,aly-miR171b-3p,aly-miR171c-3p,ath-miR171b,ath-miR171c,bna-miR171a,bna-miR171b,bna-miR171c,bna-miR171d,bna-miR171e,bol-miR171a,bra-miR171a,bra-miR171b,bra-miR171c,bra-miR171d,cme-miR171b,cme-miR171d,gma-miR171i-3p,lus-miR171i,mdm-miR171f,mes-miR171b,mes-miR171c,mtr-miR171f,ptc-miR171a-3p,ptc-miR171b,rco-miR171a,rco-miR171b,sly-miR171b,ssl-miR171a,stu-miR171d-3p,tae-miR17…	TTGAGCCGTGCCAATATCACG	2	0.11	3	0.18	0	0.01	0	0.01	0	0.01	2	0.13	17	0.91	0	0.01	2	0.11	4	0.23	0	0.01	0	0.01
ppt-miR319a,ppt-miR319b,sly-miR319a	CTTGGACTGAAGGGAGCTCC	2	0.11	1	0.06	13	0.91	0	0.01	1	0.05	10	0.64	30	1.6	10	0.71	32	1.82	0	0.01	9	0.44	36	2.14
aly-miR167d-5p,ath-miR167d,cca-miR167,nta-miR167a,nta-miR167b,nta-miR167c,rco-miR167c,sit-miR167c,ghr-miR167a	TGAAGCTGCCAGCATGATCTGG	1	0.05	0	0.01	0	0.01	0	0.01	0	0.01	0	0.01	0	0.01	0	0.01	0	0.01	0	0.01	0	0.01	0	0.01
mdm-miR7127aMIMAT0026064,mdm-miR7127bMIMAT0026065,mdm-miR7127a,mdm-miR7127b	ATACTCATCGAATTTGTCATA	1	0.05	0	0.01	0	0.01	0	0.01	0	0.01	0	0.01	0	0.01	0	0.01	0	0.01	0	0.01	0	0.01	0	0.01
mdm-miR3627dMIMAT0043534	TCCATCCTCCTGTGACATGAA	1	0.05	0	0.01	0	0.01	0	0.01	0	0.01	0	0.01	0	0.01	0	0.01	0	0.01	0	0.01	0	0.01	0	0.01
peu-miR2911	GGCCGGGGGACGGGCTGGGA	1	0.05	0	0.01	0	0.01	0	0.01	0	0.01	0	0.01	0	0.01	0	0.01	0	0.01	0	0.01	0	0.01	0	0.01
sof-miR159e	TTTGGATTGAAAGGAGCTCTT	1	0.05	0	0.01	0	0.01	0	0.01	1	0.05	0	0.01	0	0.01	0	0.01	0	0.01	0	0.01	0	0.01	0	0.01
gma-miR403a,gma-miR403b,vun-miR403	TTAGATTCACGCACAAACTTG	1	0.05	0	0.01	0	0.01	0	0.01	0	0.01	0	0.01	0	0.01	0	0.01	0	0.01	0	0.01	0	0.01	0	0.01
sit-miR16-npr	TTGACAGAAGAGAGCGAGCAC	1	0.05	0	0.01	0	0.01	0	0.01	0	0.01	0	0.01	0	0.01	0	0.01	0	0.01	0	0.01	0	0.01	0	0.01
mdm-miR530aMIMAT0043542,mdm-miR530cMIMAT0043544,mdm-miR530bMIMAT0043543	TGCATTTGCACCTGCACTTGT	0	0.01	0	0.01	9	0.63	0	0.01	0	0.01	0	0.01	0	0.01	0	0.01	0	0.01	0	0.01	0	0.01	0	0.01
gma-miR319g,gma-miR319l	TTGGACTGAAGGGAGCTCCTTC	0	0.01	0	0.01	0	0.01	0	0.01	0	0.01	0	0.01	0	0.01	0	0.01	0	0.01	0	0.01	4	0.2	28	1.66
ghr-miR5139a,ghr-miR5139b,ghr-miR5139c,ghr-miR5139d,ghr-miR5139e,ghr-miR5139f	AACCTGGCTCTGATACCA	0	0.01	0	0.01	8	0.56	0	0.01	0	0.01	0	0.01	0	0.01	0	0.01	0	0.01	0	0.01	0	0.01	0	0.01
gma-miR408d	TGCACTGCCTCTTCCCTGGC	0	0.01	0	0.01	0	0.01	0	0.01	0	0.01	0	0.01	8	0.43	0	0.01	0	0.01	0	0.01	0	0.01	0	0.01
ptc-miR171k	GGATTGAGCCGCGCCAATATC	0	0.01	0	0.01	0	0.01	0	0.01	0	0.01	0	0.01	0	0.01	1	0.07	0	0.01	0	0.01	0	0.01	0	0.01
gma-miR159d	AGCTGCTTAGCTATGGATCCC	0	0.01	0	0.01	0	0.01	0	0.01	0	0.01	0	0.01	0	0.01	0	0.01	1	0.06	0	0.01	0	0.01	0	0.01
crt-miR166b	TCGGACCAGGCTTCATTCCCTT	0	0.01	0	0.01	0	0.01	0	0.01	0	0.01	0	0.01	0	0.01	0	0.01	0	0.01	0	0.01	4	0.2	0	0.01
bna-miR167a,bna-miR167b	TGAAGCTGCCAGCATGATCTAA	0	0.01	6	0.35	0	0.01	0	0.01	13	0.69	0	0.01	8	0.43	0	0.01	8	0.46	8	0.46	15	0.74	0	0.01
mdm-miR10983MIMAT0043546	CAGAGCAAAACAGTCGTGGAA	0	0.01	0	0.01	0	0.01	0	0.01	0	0.01	0	0.01	13	0.69	0	0.01	0	0.01	0	0.01	0	0.01	0	0.01
mdm-miR10996bMIMAT0043622	TCACCATTGCATCTCATGTTCC	0	0.01	0	0.01	0	0.01	0	0.01	0	0.01	0	0.01	0	0.01	0	0.01	0	0.01	0	0.01	3	0.15	0	0.01
bna-miR162a	TCGATAAACCTGTGCATCCAG	0	0.01	0	0.01	1	0.07	0	0.01	0	0.01	0	0.01	0	0.01	0	0.01	0	0.01	0	0.01	1	0.05	0	0.01
ptc-miRf10576-akr	CATTGGACTGAAGGGAGCTCC	0	0.01	11	0.65	0	0.01	0	0.01	0	0.01	0	0.01	0	0.01	1	0.07	0	0.01	10	0.57	3	0.15	0	0.01
bdi-miR166j,lus-miR166f,pab-miR166b,pga-miR166,ptc-miR166n,ptc-miR166o,ptc-miR166q	TCGGACCAGGCTTCATTCCTT	0	0.01	0	0.01	3	0.21	0	0.01	0	0.01	0	0.01	22	1.17	0	0.01	17	0.97	1	0.06	0	0.01	0	0.01
mdm-miR10997MIMAT0043581	TAACCTTATTTGATTTCACGA	0	0.01	0	0.01	0	0.01	0	0.01	0	0.01	0	0.01	0	0.01	3	0.21	0	0.01	0	0.01	0	0.01	0	0.01
ghr-miR5072b,ghr-miR5072c	TCCCCAGTGGAGTCGCCA	0	0.01	0	0.01	9	0.63	0	0.01	0	0.01	0	0.01	0	0.01	0	0.01	0	0.01	0	0.01	0	0.01	0	0.01
smo-miR396	TTCCACGGCTTTCTTGAACC	0	0.01	1	0.06	0	0.01	0	0.01	0	0.01	0	0.01	0	0.01	0	0.01	0	0.01	0	0.01	0	0.01	0	0.01
aly-miR858-5p,ath-miR858a	TTTCGTTGTCTGTTCGACCTT	0	0.01	0	0.01	0	0.01	0	0.01	31	1.65	0	0.01	14	0.75	4	0.29	48	2.73	0	0.01	6	0.29	0	0.01
mdm-miR10978bMIMAT0043528,mdm-miR10978aMIMAT0043527	GTTGGGAATCGAAGCATCACGA	0	0.01	0	0.01	0	0.01	0	0.01	0	0.01	10	0.64	0	0.01	0	0.01	0	0.01	0	0.01	5	0.25	0	0.01
aly-miR164c-5p,ath-miR164c,bna-miR164b,bna-miR164c,bna-miR164d,bra-miR164b-5p,bra-miR164c-5p,bra-miR164d-5p,cln-miR164	TGGAGAAGCAGGGCACGTGCG	0	0.01	0	0.01	0	0.01	0	0.01	1	0.05	0	0.01	0	0.01	0	0.01	0	0.01	0	0.01	0	0.01	0	0.01
ath-miR840	ACACTGAAGGACCTAAACTAAC	0	0.01	0	0.01	0	0.01	0	0.01	0	0.01	0	0.01	0	0.01	0	0.01	14	0.8	0	0.01	0	0.01	0	0.01
gma-miR319p	TTTTGGACTGAAGGGAGCTCC	0	0.01	0	0.01	0	0.01	0	0.01	0	0.01	0	0.01	13	0.69	3	0.21	0	0.01	0	0.01	0	0.01	0	0.01
gma-miR171k-5p,gma-miR171l,lja-miR171d-3p,mtr-miR171e-5p	CGATGTTGGTGAGGTTCAATC	0	0.01	0	0.01	0	0.01	0	0.01	0	0.01	0	0.01	0	0.01	0	0.01	0	0.01	8	0.46	7	0.34	0	0.01
mdm-miR10980bMIMAT0043531,mdm-miR10980aMIMAT0043530	CACCTGGGACTTGCAGCCATG	0	0.01	0	0.01	0	0.01	0	0.01	0	0.01	0	0.01	0	0.01	5	0.36	0	0.01	0	0.01	0	0.01	0	0.01
sly-miR6027-5p	ATGGGTAGCACAAGGATTAATG	0	0.01	8	0.47	0	0.01	0	0.01	0	0.01	0	0.01	0	0.01	0	0.01	0	0.01	0	0.01	0	0.01	0	0.01
mtr-miR166b	TCGGACCAGGCTTCATTCCTA	0	0.01	0	0.01	0	0.01	0	0.01	0	0.01	0	0.01	1	0.05	0	0.01	0	0.01	0	0.01	0	0.01	1	0.06
sly-miR171e,stu-miR171b-3p	TTGAGCCGCGTCAATATCTCT	0	0.01	0	0.01	0	0.01	0	0.01	0	0.01	2	0.13	0	0.01	0	0.01	4	0.23	1	0.06	3	0.15	0	0.01
bdi-miR160f,gma-miR160b,gma-miR160c,gma-miR160d,gma-miR160e,htu-miR160a	TGCCTGGCTCCCTGTATGCC	0	0.01	0	0.01	0	0.01	0	0.01	0	0.01	0	0.01	0	0.01	0	0.01	0	0.01	0	0.01	0	0.01	42	2.5
mdm-miR11017MIMAT0043627	CTCTAATCTGCCCAACAACTT	0	0.01	7	0.41	9	0.63	0	0.01	0	0.01	0	0.01	0	0.01	0	0.01	0	0.01	0	0.01	0	0.01	0	0.01
lus-miR171a,lus-miR171f,mes-miR171e,mes-miR171f,mtr-miR171e-3p,ptc-miR171c,ptc-miR171d,rco-miR171g,tcc-miR171b,tcc-miR171c	AGATTGAGCCGCGCCAATATC	0	0.01	0	0.01	0	0.01	0	0.01	0	0.01	0	0.01	0	0.01	0	0.01	0	0.01	0	0.01	1	0.05	0	0.01
ptc-miRf10514-akr	CTCGGACCAGGCTTCATTCC	0	0.01	0	0.01	1	0.07	0	0.01	0	0.01	0	0.01	0	0.01	0	0.01	0	0.01	0	0.01	0	0.01	0	0.01
mdm-miR393fMIMAT0026063,mdm-miR393dMIMAT0026061,mdm-miR393eMIMAT0026062,mdm-miR393d,mdm-miR393e,mdm-miR393f	ATCATGCGATCCCTTCGGACG	0	0.01	0	0.01	0	0.01	0	0.01	0	0.01	0	0.01	3	0.16	0	0.01	0	0.01	0	0.01	0	0.01	0	0.01
osa-miR162b	TCGATAAGCCTCTGCATCCAG	0	0.01	0	0.01	0	0.01	0	0.01	0	0.01	0	0.01	1	0.05	0	0.01	0	0.01	0	0.01	0	0.01	0	0.01
osa-miR319a-3p.2-3p,osa-miR319b,sbi-miR319a,sbi-miR319b,sof-miR319a,zma-miR319a-3p,zma-miR319b-3p,zma-miR319c-3p,zma-miR319d-3p	TTGGACTGAAGGGTGCTCCC	0	0.01	0	0.01	0	0.01	0	0.01	0	0.01	0	0.01	1	0.05	0	0.01	3	0.17	1	0.06	0	0.01	0	0.01
osa-miR1862d	ACTAGGTTTGTTTATTTTGGGACG	0	0.01	0	0.01	0	0.01	0	0.01	0	0.01	0	0.01	0	0.01	1	0.07	0	0.01	0	0.01	0	0.01	0	0.01
mdm-miR171gMIMAT0025944,mdm-miR171hMIMAT0025945,aqc-miR171a,aqc-miR171b,aqc-miR171d,bdi-miR171b,bdi-miR171c-3p,bdi-miR171d-3p,bdi-miR171e,cme-miR171c,cme-miR171f,cpa-miR171a,cpa-miR171b,cpa-miR171c,cpa-miR171d,crt-miR171,far-miR171,gma-miR171e,gma-miR171f,gma-miR171g,gma-miR171j-3p,gma-miR171u,hpa-miR171a,htu-miR171b,htu-miR171c,hvu-miR171-3p,lja-miR171a,lus-miR171b,lus-miR171c,lus-miR171e,mdm-mi…	TGATTGAGCCGTGCCAATATC	0	0.01	0	0.01	0	0.01	0	0.01	8	0.43	0	0.01	0	0.01	2	0.14	0	0.01	0	0.01	0	0.01	0	0.01
gcl-miR396b	TTCCATAGCTTTCTTGAACTG	0	0.01	1	0.06	0	0.01	0	0.01	0	0.01	0	0.01	0	0.01	0	0.01	0	0.01	0	0.01	0	0.01	0	0.01
bna-miR156a,hvu-miR156,rco-miR156a,rco-miR156b,rco-miR156c,rco-miR156d,sit-miR156a-1,sit-miR156a-2,sit-miR156a-3,sit-miR156a-4,sit-miR156a-5,ssl-miR156,ssp-miR156,tae-miR156	TGACAGAAGAGAGTGAGCACA	0	0.01	0	0.01	0	0.01	0	0.01	20	1.06	0	0.01	0	0.01	0	0.01	0	0.01	0	0.01	0	0.01	0	0.01
ptc-miRf10034-akr	GATTTCGGACCAGGCTTCATTCC	0	0.01	0	0.01	0	0.01	0	0.01	0	0.01	0	0.01	0	0.01	0	0.01	0	0.01	9	0.52	0	0.01	0	0.01
stu-miR172c-3p	AGAATCTTGATGATGCTGC	0	0.01	0	0.01	0	0.01	0	0.01	0	0.01	0	0.01	8	0.43	0	0.01	13	0.74	0	0.01	5	0.25	0	0.01
mdm-miR11002c-5pMIMAT0043596	CCCAGTCACCTCCGAAGCTCA	0	0.01	11	0.65	0	0.01	0	0.01	0	0.01	0	0.01	9	0.48	0	0.01	0	0.01	0	0.01	0	0.01	0	0.01
mdm-miR156sMIMAT0025885,mdm-miR156rMIMAT0025884,mdm-miR156pMIMAT0025882,mdm-miR156qMIMAT0025883,mdm-miR156p,mdm-miR156q,mdm-miR156r,mdm-miR156s,smo-miR156b	CTGACAGAAGATAGAGAGCAC	0	0.01	0	0.01	0	0.01	0	0.01	13	0.69	4	0.26	0	0.01	0	0.01	0	0.01	0	0.01	3	0.15	0	0.01
mdm-miR172gMIMAT0025958,mdm-miR172dMIMAT0025955,mdm-miR172pMIMAT0043620,mdm-miR172fMIMAT0025957,mdm-miR172hMIMAT0025959,mdm-miR172eMIMAT0025956,aly-miR172a-3p,aly-miR172b-3p,aqc-miR172a,ath-miR172a,ath-miR172b-3p,bdi-miR172a-3p,bna-miR172a,bol-miR172a,bol-miR172b,bra-miR172a,bra-miR172b-3p,cca-miR172,cme-miR172b,cme-miR172c,dpr-miR172a,dpr-miR172b,egu-miR172a,egu-miR172b,egu-miR172c,gma-miR172a,g…	AGAATCTTGATGATGCTGCAT	0	0.01	0	0.01	0	0.01	0	0.01	0	0.01	0	0.01	0	0.01	0	0.01	9	0.51	0	0.01	0	0.01	0	0.01
peu-miR2914	CATGGTGGTGACGGGTGACGGAG	0	0.01	0	0.01	0	0.01	0	0.01	16	0.85	0	0.01	0	0.01	0	0.01	0	0.01	0	0.01	0	0.01	0	0.01
gma-miR162a,zma-miR162-3p	TCGATAAACCTCTGCATCCA	0	0.01	0	0.01	0	0.01	0	0.01	0	0.01	14	0.9	0	0.01	0	0.01	0	0.01	4	0.23	2	0.1	35	2.08
ghr-miR482b,ghr-miR482e	TCTTCCCAACACCTCCCATACC	0	0.01	0	0.01	0	0.01	0	0.01	0	0.01	0	0.01	1	0.05	1	0.07	0	0.01	0	0.01	0	0.01	0	0.01
csi-miR171a,sly-miR171d	TTGAGCCGCGCCAATATCAC	0	0.01	0	0.01	0	0.01	0	0.01	0	0.01	0	0.01	5	0.27	3	0.21	0	0.01	0	0.01	0	0.01	0	0.01
cme-miR171h,lja-miR171b,lus-miR171g,lus-miR171j,mtr-miR171b,vvi-miR171b	TGATTGAGCCGCGTCAATATC	0	0.01	0	0.01	0	0.01	0	0.01	0	0.01	0	0.01	0	0.01	0	0.01	0	0.01	0	0.01	4	0.2	0	0.01
gma-miR164b,gma-miR164c,gma-miR164d	TGGAGAAGCAGGGCACGTGC	0	0.01	0	0.01	0	0.01	0	0.01	0	0.01	0	0.01	0	0.01	2	0.14	0	0.01	0	0.01	0	0.01	0	0.01
cln-miR162	TTGATAAACCTCTGCATCCAG	0	0.01	0	0.01	0	0.01	0	0.01	0	0.01	0	0.01	0	0.01	0	0.01	0	0.01	0	0.01	0	0.01	1	0.06
ppe-miR482c-5p	GGAATGGGCTGTTTGGGATG	0	0.01	0	0.01	1	0.07	0	0.01	0	0.01	0	0.01	0	0.01	0	0.01	0	0.01	0	0.01	0	0.01	0	0.01
avm-miR156,sit-miR113-1-npr,sit-miR113-2-npr	CTGACAGAAGAGAGTGAGCAC	0	0.01	0	0.01	0	0.01	0	0.01	0	0.01	0	0.01	1	0.05	0	0.01	0	0.01	0	0.01	0	0.01	0	0.01
aly-miR164a-3p	CACGTACTCCCCTTCTCCAAC	0	0.01	0	0.01	0	0.01	0	0.01	0	0.01	0	0.01	0	0.01	0	0.01	1	0.06	0	0.01	0	0.01	0	0.01
bdi-miR319b-3p,sit-miR319-1,sit-miR319-2	TTGGACTGAAGGGTGCTCCCT	0	0.01	0	0.01	0	0.01	0	0.01	0	0.01	0	0.01	0	0.01	0	0.01	1	0.06	0	0.01	0	0.01	1	0.06
gba-miR396c,gba-miR396d,gba-miR396e,gba-miR396f,gba-miR396g,gba-miR396h	TTCCACAGCTTTCTTGAA	0	0.01	0	0.01	0	0.01	0	0.01	0	0.01	0	0.01	0	0.01	0	0.01	0	0.01	6	0.34	6	0.29	0	0.01
cca-miR390	AAGCTCAGGAGGGATAGCGTC	0	0.01	0	0.01	0	0.01	0	0.01	0	0.01	0	0.01	1	0.05	0	0.01	0	0.01	1	0.06	0	0.01	0	0.01
mdm-miR10988MIMAT0043554	AGAGAAAATTCATTCCAACGC	0	0.01	0	0.01	0	0.01	0	0.01	0	0.01	0	0.01	0	0.01	0	0.01	0	0.01	0	0.01	2	0.1	0	0.01
mdm-miR398aMIMAT0025998,aly-miR398a-3p,aqc-miR398a,ath-miR398a,bol-miR398a,cme-miR398b,csi-miR398,gma-miR398a,gma-miR398b,gra-miR398,mdm-miR398a,mtr-miR398a-3p,osa-miR398a,ptc-miR398a,rco-miR398a,tcc-miR398b,vvi-miR398a,ghr-miR398b,ghr-miR398c	TGTGTTCTCAGGTCACCCCTT	0	0.01	0	0.01	0	0.01	0	0.01	0	0.01	13	0.83	0	0.01	0	0.01	0	0.01	0	0.01	1	0.05	0	0.01
bdi-miR5054	TCCCCACGGTCGGCGCCA	0	0.01	0	0.01	3	0.21	0	0.01	0	0.01	0	0.01	0	0.01	0	0.01	0	0.01	0	0.01	0	0.01	0	0.01
pde-miR159	TTTGGTTTGAAGGGAGCTCTA	0	0.01	0	0.01	0	0.01	24	2	0	0.01	1	0.06	2	0.11	5	0.36	4	0.23	1	0.06	2	0.1	3	0.18
gma-miR156q,gma-miR156s	TGACAGAAGAGAGTGAGCACT	0	0.01	0	0.01	0	0.01	0	0.01	11	0.58	0	0.01	0	0.01	0	0.01	0	0.01	0	0.01	4	0.2	0	0.01
mdm-miR399gMIMAT0026007,mdm-miR399eMIMAT0026005,mdm-miR399hMIMAT0026008,mdm-miR399fMIMAT0026006,mdm-miR399e,mdm-miR399f,mdm-miR399g,mdm-miR399h,mes-miR399e,ppe-miR399m,ppe-miR399n	TGCCAAAGGAGATTTGCTCGG	0	0.01	0	0.01	0	0.01	0	0.01	0	0.01	0	0.01	0	0.01	0	0.01	0	0.01	0	0.01	4	0.2	0	0.01
mdm-miR10987MIMAT0043553	CCATATGTCCCTCCATATACT	0	0.01	0	0.01	0	0.01	0	0.01	0	0.01	5	0.32	0	0.01	0	0.01	10	0.57	0	0.01	0	0.01	0	0.01
mdm-miR11002bMIMAT0043601,mdm-miR11002aMIMAT0043600,mdm-miR11002c-3pMIMAT0043597	GAGGATGAGCTTCGGCGGTGA	0	0.01	3	0.18	0	0.01	0	0.01	0	0.01	0	0.01	0	0.01	1	0.07	0	0.01	0	0.01	0	0.01	0	0.01
ppe-miR319b	TAGCTGCCGAGTCATTCATCCA	0	0.01	0	0.01	7	0.49	0	0.01	0	0.01	0	0.01	6	0.32	0	0.01	0	0.01	0	0.01	0	0.01	0	0.01
mdm-miR399cMIMAT0026003,mdm-miR399aMIMAT0026001,mdm-miR399bMIMAT0026002,bdi-miR399b,bdi-miR399c,csi-miR399c,csi-miR399e,gma-miR399i,lus-miR399b,lus-miR399d,mdm-miR399a,mdm-miR399b,mdm-miR399c,mes-miR399a,osa-miR399a,osa-miR399b,osa-miR399c,ptc-miR399f,ptc-miR399g,sbi-miR399a,sbi-miR399c,sbi-miR399h,sbi-miR399j,sit-miR399a-1,sit-miR399a-2,tcc-miR399g,vvi-miR399a,vvi-miR399h,zma-miR399a-3p,zma-miR3…	TGCCAAAGGAGAATTGCCCTG	0	0.01	0	0.01	0	0.01	0	0.01	0	0.01	0	0.01	1	0.05	0	0.01	0	0.01	0	0.01	0	0.01	0	0.01
mdm-miR156xMIMAT0025890,mdm-miR156yMIMAT0025891,mdm-miR156zMIMAT0025892,mdm-miR156aaMIMAT0025893,aly-miR157d-5p,aqc-miR156a,aqc-miR156b,ath-miR157d,cme-miR156f,mdm-miR156aa,mdm-miR156x,mdm-miR156y,mdm-miR156z,nta-miR156g,nta-miR156h,nta-miR156i,nta-miR156j,ppe-miR156f	TGACAGAAGATAGAGAGCAC	0	0.01	0	0.01	0	0.01	0	0.01	0	0.01	0	0.01	0	0.01	0	0.01	0	0.01	0	0.01	2	0.1	0	0.01
rgl-miR5141	AGACCCGACGCGACTGACAGATAA	0	0.01	0	0.01	0	0.01	0	0.01	0	0.01	0	0.01	0	0.01	0	0.01	0	0.01	0	0.01	3	0.15	0	0.01
mdm-miR10989cMIMAT0043557,mdm-miR10989dMIMAT0043558,mdm-miR10989aMIMAT0043555,mdm-miR10989eMIMAT0043559,mdm-miR10989bMIMAT0043556	CAAAGCTTTTAATATCAGTCGA	0	0.01	0	0.01	0	0.01	0	0.01	0	0.01	0	0.01	0	0.01	1	0.07	29	1.65	0	0.01	0	0.01	0	0.01
mdm-miR477aMIMAT0026021,mdm-miR477	ACTCTCCCTCAAGAGCTTCTC	0	0.01	0	0.01	0	0.01	0	0.01	0	0.01	1	0.06	0	0.01	0	0.01	0	0.01	0	0.01	0	0.01	0	0.01
aly-miR390a-3p,lja-miR390a-3p,lja-miR390b-3p,sly-miR390b-3p,gba-miR390j	CGCTATCCATCCTGAGTTTCA	0	0.01	0	0.01	0	0.01	0	0.01	0	0.01	0	0.01	3	0.16	0	0.01	0	0.01	0	0.01	5	0.25	0	0.01
cca-miR164,osa-miR164c	TGGAGAAGCAGGGTACGTGCA	0	0.01	0	0.01	1	0.07	0	0.01	0	0.01	0	0.01	0	0.01	0	0.01	0	0.01	0	0.01	0	0.01	0	0.01
cca-miR408,nta-miR408,ppt-miR408b,stu-miR408b-3p	TGCACTGCCTCTTCCCTGGCT	0	0.01	0	0.01	0	0.01	0	0.01	0	0.01	0	0.01	0	0.01	0	0.01	9	0.51	0	0.01	0	0.01	0	0.01
mdm-miR10990MIMAT0043560	CCAAGGAAAATTTTATGACGA	0	0.01	0	0.01	0	0.01	0	0.01	0	0.01	0	0.01	0	0.01	0	0.01	4	0.23	0	0.01	0	0.01	0	0.01
ppe-miR482c-3p	TTCCCAAGCCCGCCCATTCCAA	0	0.01	1	0.06	0	0.01	0	0.01	0	0.01	1	0.06	0	0.01	0	0.01	0	0.01	0	0.01	0	0.01	1	0.06
sof-miR319b	TTGGATTGAAGGGAGCTCCT	0	0.01	0	0.01	0	0.01	1	0.08	0	0.01	0	0.01	7	0.37	1	0.07	0	0.01	0	0.01	1	0.05	34	2.02
pta-miR159a	TTGGATTGAAGGGAGCTCCA	0	0.01	0	0.01	0	0.01	0	0.01	0	0.01	0	0.01	0	0.01	4	0.29	0	0.01	0	0.01	0	0.01	0	0.01
pde-miR947,pta-miR947	CATCGGAATCTGTTACTGTTTC	0	0.01	0	0.01	0	0.01	0	0.01	0	0.01	0	0.01	5	0.27	0	0.01	0	0.01	0	0.01	0	0.01	0	0.01
gma-miR390e	AGCTCAGGAGGGATAGCGCC	0	0.01	0	0.01	0	0.01	0	0.01	0	0.01	0	0.01	7	0.37	0	0.01	0	0.01	0	0.01	0	0.01	0	0.01
zma-miR171a-3p	TGATTGAGCCGCGCCAATAT	0	0.01	0	0.01	0	0.01	0	0.01	0	0.01	0	0.01	0	0.01	0	0.01	0	0.01	0	0.01	2	0.1	0	0.01
ath-miR161.1	TGAAAGTGACTACATCGGGGT	0	0.01	0	0.01	0	0.01	0	0.01	0	0.01	0	0.01	0	0.01	0	0.01	9	0.51	0	0.01	0	0.01	0	0.01
tae-miR166a_npr	CCGGACCAGGCTTCATTCCCA	0	0.01	0	0.01	0	0.01	1	0.08	0	0.01	0	0.01	0	0.01	0	0.01	0	0.01	0	0.01	0	0.01	0	0.01
mdm-miR167aMIMAT0025922,mdm-miR167a	AGATCATCTGGCAGTTTCACC	0	0.01	0	0.01	0	0.01	0	0.01	0	0.01	0	0.01	7	0.37	0	0.01	0	0.01	0	0.01	0	0.01	0	0.01
ppe-miR7122a-5p	TTATACAATGAAATCACGGCCG	0	0.01	0	0.01	0	0.01	0	0.01	0	0.01	0	0.01	0	0.01	0	0.01	20	1.14	0	0.01	0	0.01	0	0.01
hci-miR156a	TGACAGAAGAGAGTGAGTAC	0	0.01	0	0.01	0	0.01	0	0.01	0	0.01	0	0.01	0	0.01	0	0.01	1	0.06	0	0.01	0	0.01	0	0.01
mdm-miR172lMIMAT0025963,cme-miR172a,gma-miR172c,lus-miR172e,lus-miR172i,mdm-miR172l,mes-miR172e,mes-miR172f,ppe-miR172d,ptc-miR172g-3p,ptc-miR172h-3p,rco-miR172,stu-miR172d-3p,vun-miR172c.1,vun-miR172c.2,vvi-miR172c	GGAATCTTGATGATGCTGCAG	0	0.01	0	0.01	0	0.01	0	0.01	0	0.01	3	0.19	7	0.37	0	0.01	0	0.01	0	0.01	4	0.2	0	0.01
mdm-miR11012bMIMAT0043615,mdm-miR11012aMIMAT0043614	CCGCTGCCTATGCAATGCACCC	0	0.01	0	0.01	0	0.01	0	0.01	12	0.64	0	0.01	0	0.01	0	0.01	0	0.01	0	0.01	0	0.01	0	0.01
ppt-miR390c-5p	GAGCTCAGGAGGGATAGCGCC	0	0.01	0	0.01	0	0.01	0	0.01	0	0.01	0	0.01	0	0.01	0	0.01	0	0.01	1	0.06	0	0.01	0	0.01
mdm-miR10995MIMAT0043579	CAAGCTTCCTCTTCATACTCGT	0	0.01	0	0.01	9	0.63	0	0.01	0	0.01	0	0.01	0	0.01	0	0.01	0	0.01	0	0.01	12	0.59	0	0.01
mdm-miR393gMIMAT0043583,mdm-miR393hMIMAT0043584,ptc-miR393a-3p,ptc-miR393b-3p,gba-miR393h,gba-miR393i,gba-miR393j,gba-miR393k	ATCATGCTATCCCTTTGGATT	0	0.01	0	0.01	0	0.01	0	0.01	0	0.01	0	0.01	0	0.01	0	0.01	5	0.28	0	0.01	3	0.15	0	0.01
stu-miR482a-5p	GGAATTGGTGGATTGGAAAGC	0	0.01	8	0.47	0	0.01	0	0.01	0	0.01	0	0.01	0	0.01	0	0.01	0	0.01	0	0.01	0	0.01	0	0.01
[truncated: 6 more columns]

## Sheet: denovo_miRNA_expression
#NoX_mature_exp stands for the mature sequence raw reads count
#NoX_star_exp stands for the star sequence raw reads count
#NoX_mature_std stands for the mature sequence RPM
#NoX_star_std stands for the star sequence RPM.
#X corresponds to Library letter (A, B, C, D, E, F, G, H, I, J, K, L)
Mature_id	Mature_arm	Mature_seq	Star_id	Star_arm	Star_seq	LibA_mature_exp	LibA_star_exp	LibA_mature_std	LibA_star_std	LibB_mature_exp	LibB_star_exp	LibB_mature_std	LibB_star_std	LibC_mature_exp	LibC_star_exp	LibC_mature_std	LibC_star_std	LibD_mature_exp	LibD_star_exp	LibD_mature_std	LibD_star_std	LibE_mature_exp	LibE_star_exp	LibE_mature_std	LibE_star_std	LibF_mature_exp	LibF_star_exp	LibF_mature_std	LibF_star_std	LibG_mature_exp	LibG_star_exp	LibG_mature_std	LibG_star_std	LibH_mature_exp	LibH_star_exp	LibH_mature_std	LibH_star_std	LibI_mature_exp	LibI_star_exp	LibI_mature_std	LibI_star_std	LibJ_mature_exp	LibJ_star_exp	LibJ_mature_std	LibJ_star_std	LibK_mature_exp	LibK_star_exp	LibK_mature_std	LibK_star_std
bdi-miR393a,bdi-miR393b-5p,bna-miR393,cme-miR393a,cme-miR393b,cme-miR393c,gma-miR393a,lus-miR393a,lus-miR393b,lus-miR393c,lus-miR393d,mtr-miR393a,mtr-miR393b-5p,osa-miR393a,ppe-miR393b,ptc-miR393a-5p,ptc-miR393b-5p,ptc-miR393c,rco-miR393,sbi-miR393a,sbi-miR393b,tcc-miR393b,vvi-miR393a,vvi-miR393b	5p	TCCAAAGGGATCGCATTGATC	t02886324_x794*	3p	TCATGCTATCCCTTTGGATT	76	0	4.01	0.01	50	0	2.96	0.01	12	0	0.84	0.01	62	0	5.18	0.01	6	0	0.32	0.01	2	0	0.13	0.01	203	6	10.83	0.32	8	0	0.57	0.01	306	0	17.41	0.01	11	0	0.63	0.01	30	0	1.47	0.01
bdi-miR393a,bdi-miR393b-5p,bna-miR393,cme-miR393a,cme-miR393b,cme-miR393c,gma-miR393a,lus-miR393a,lus-miR393b,lus-miR393c,lus-miR393d,mtr-miR393a,mtr-miR393b-5p,osa-miR393a,ppe-miR393b,ptc-miR393a-5p,ptc-miR393b-5p,ptc-miR393c,rco-miR393,sbi-miR393a,sbi-miR393b,tcc-miR393b,vvi-miR393a,vvi-miR393b	5p	TCCAAAGGGATCGCATTGATC	t02886324_x794*	3p	TCATGCTATCCCTTTGGATT	76	0	4.01	0.01	50	0	2.96	0.01	12	0	0.84	0.01	62	0	5.18	0.01	6	0	0.32	0.01	2	0	0.13	0.01	203	6	10.83	0.32	8	0	0.57	0.01	306	0	17.41	0.01	11	0	0.63	0.01	30	0	1.47	0.01
bna-miR167d,lja-miR167a,lja-miR167b,lja-miR167c,gba-miR167a,gba-miR167b,gba-miR167c	5p	TGAAGCTGCCAGCATGATCT	t04370797_x406*	3p	ATCATCTGGCAGTTTCACC	51	0	2.69	0.01	44	0	2.6	0.01	42	0	2.95	0.01	0	0	0.01	0.01	81	0	4.3	0.01	18	0	1.15	0.01	24	0	1.28	0.01	23	0	1.64	0.01	0	0	0.01	0.01	32	0	1.84	0.01	50	0	2.45	0.01
bna-miR167d,lja-miR167a,lja-miR167b,lja-miR167c,gba-miR167a,gba-miR167b,gba-miR167c	5p	TGAAGCTGCCAGCATGATCT	t04370797_x406*	3p	ATCATCTGGCAGTTTCACC	51	0	2.69	0.01	44	0	2.6	0.01	42	0	2.95	0.01	0	0	0.01	0.01	81	0	4.3	0.01	18	0	1.15	0.01	24	0	1.28	0.01	23	0	1.64	0.01	0	0	0.01	0.01	32	0	1.84	0.01	50	0	2.45	0.01
cme-miR319a,cme-miR319b,ctr-miR319,gma-miR319a,gma-miR319b,gma-miR319e,ltu-miR319,lus-miR319b,mtr-miR319a-3p,mtr-miR319b-3p,ppe-miR319a,ptc-miR319a,ptc-miR319b,ptc-miR319c,ptc-miR319d,vun-miR319a.1,vun-miR319a.2	3p	TTGGACTGAAGGGAGCTCCC	t10261100_x71457*	5p	GAGCTCCTTTTAGTCCAATT	8608	0	454.73	0.01	5615	0	332.08	0.01	3726	0	261.57	0.01	7590	0	633.55	0.01	4119	0	218.83	0.01	4251	0	271.91	0.01	11904	0	635.3	0.01	2089	0	148.86	0.01	11514	0	655	0.01	3032	0	174.17	0.01	4200	0	205.89	0.01
cme-miR319c,cme-miR319d,ppl-miR319,ptc-miR319e,ptc-miR319f,ptc-miR319g,ptc-miR319h,stu-miR319b	3p	TTGGACTGAAGGGAGCTCCT	t07023542_x72176*	5p	GAGCTCTTCTTCAGTCCAGTC	8799	0	464.82	0.01	4395	0	259.93	0.01	3501	0	245.78	0.01	3601	0	300.58	0.01	5734	0	304.62	0.01	6149	0	393.31	0.01	9300	0	496.33	0.01	4680	1	333.49	0.07	10121	0	575.76	0.01	4315	0	247.88	0.01	5479	3	268.59	0.15
cme-miR319c,cme-miR319d,ppl-miR319,ptc-miR319e,ptc-miR319f,ptc-miR319g,ptc-miR319h,stu-miR319b	3p	TTGGACTGAAGGGAGCTCCT	t07023542_x72176*	5p	GAGCTCTTCTTCAGTCCAGTC	8799	0	464.82	0.01	4395	0	259.93	0.01	3501	0	245.78	0.01	3601	0	300.58	0.01	5734	0	304.62	0.01	6149	0	393.31	0.01	9300	0	496.33	0.01	4680	1	333.49	0.07	10121	0	575.76	0.01	4315	0	247.88	0.01	5479	3	268.59	0.15
gma-miR156k,gma-miR156n,gma-miR156o,sit-miR156d-1,sit-miR156d-2	5p	TTGACAGAAGAGAGTGAGCAC	t09086060_x1249*	3p	GCTCATGTCTCTTTCTGTCAGCT	188	0	9.93	0.01	77	0	4.55	0.01	132	0	9.27	0.01	52	0	4.34	0.01	65	0	3.45	0.01	84	0	5.37	0.01	169	0	9.02	0.01	73	0	5.2	0.01	203	0	11.55	0.01	54	0	3.1	0.01	127	0	6.23	0.01
gma-miR156k,gma-miR156n,gma-miR156o,sit-miR156d-1,sit-miR156d-2	5p	TTGACAGAAGAGAGTGAGCAC	t09086060_x1249*	3p	GCTCATGTCTCTTTCTGTCAGCT	188	0	9.93	0.01	77	0	4.55	0.01	132	0	9.27	0.01	52	0	4.34	0.01	65	0	3.45	0.01	84	0	5.37	0.01	169	0	9.02	0.01	73	0	5.2	0.01	203	0	11.55	0.01	54	0	3.1	0.01	127	0	6.23	0.01
gma-miR156k,gma-miR156n,gma-miR156o,sit-miR156d-1,sit-miR156d-2	5p	TTGACAGAAGAGAGTGAGCAC	t09086060_x1249*	3p	GCTCACCTCTCTCTCTGTCAGCT	188	0	9.93	0.01	77	0	4.55	0.01	132	0	9.27	0.01	52	0	4.34	0.01	65	0	3.45	0.01	84	0	5.37	0.01	169	0	9.02	0.01	73	0	5.2	0.01	203	0	11.55	0.01	54	0	3.1	0.01	127	0	6.23	0.01
gma-miR156k,gma-miR156n,gma-miR156o,sit-miR156d-1,sit-miR156d-2	5p	TTGACAGAAGAGAGTGAGCAC	t09086060_x1249*	3p	GCTCACCTCTCTCTCTGTCAGCT	188	0	9.93	0.01	77	0	4.55	0.01	132	0	9.27	0.01	52	0	4.34	0.01	65	0	3.45	0.01	84	0	5.37	0.01	169	0	9.02	0.01	73	0	5.2	0.01	203	0	11.55	0.01	54	0	3.1	0.01	127	0	6.23	0.01
gma-miR156k,gma-miR156n,gma-miR156o,sit-miR156d-1,sit-miR156d-2	5p	TTGACAGAAGAGAGTGAGCAC	t09086060_x1249*	3p	GCTCACTTCTCTCTCCGTCAGCT	188	0	9.93	0.01	77	0	4.55	0.01	132	0	9.27	0.01	52	0	4.34	0.01	65	0	3.45	0.01	84	0	5.37	0.01	169	0	9.02	0.01	73	0	5.2	0.01	203	0	11.55	0.01	54	0	3.1	0.01	127	0	6.23	0.01
gma-miR396a-3p	3p	TTCAATAAAGCTGTGGGAAG	vvi-miR396b	5p	TTCCACAGCTTTCTTGAACT	557	91	29.42	4.81	295	1	17.45	0.06	242	56	16.99	3.93	524	66	43.74	5.51	283	45	15.03	2.39	279	72	17.85	4.61	1119	63	59.72	3.36	242	6	17.24	0.43	980	62	55.75	3.53	146	71	8.39	4.08	327	109	16.03	5.34
gma-miR396a-3p	3p	TTCAATAAAGCTGTGGGAAG	t04830282_x5774*	5p	TTCCACAGCTTTCTTGAACA	557	13	29.42	0.69	295	22	17.45	1.3	242	0	16.99	0.01	524	35	43.74	2.92	283	20	15.03	1.06	279	22	17.85	1.41	1119	20	59.72	1.07	242	11	17.24	0.78	980	11	55.75	0.63	146	0	8.39	0.01	327	5	16.03	0.25
mdm-miR1511MIMAT0026188,mdm-miR1511	3p	ACCTAGCTCTGATACCATGAA	t00719148_x317612*	5p	TGTGGTATCAGGACTATGTTA	36555	20	1931.06	1.06	35340	0	2090.06	0.01	23276	2	1634.04	0.14	8144	28	679.79	2.34	23413	23	1243.83	1.22	20940	0	1339.38	0.01	40830	46	2179.06	2.45	16577	5	1181.24	0.36	50843	33	2892.33	1.88	20042	13	1151.32	0.75	29196	18	1431.23	0.88
mdm-miR156eMIMAT0025871,mdm-miR156mMIMAT0025879,mdm-miR156iMIMAT0025875,mdm-miR156bMIMAT0025868,mdm-miR156hMIMAT0025874,mdm-miR156lMIMAT0025878,mdm-miR156nMIMAT0025880,mdm-miR156fMIMAT0025872,mdm-miR156jMIMAT0025876,mdm-miR156cMIMAT0025869,mdm-miR156gMIMAT0025873,mdm-miR156aMIMAT0025867,mdm-miR156dMIMAT0025870,mdm-miR156oMIMAT0025881,mdm-miR156kMIMAT0025877,aly-miR156a-5p,aly-miR156b-5p,aly-miR15…	5p	TGACAGAAGAGAGTGAGCAC	sly-miR156e-3p,stu-miR156g-3p	3p	GCTTACTCTCTATCTGTCACC	42	0	2.22	0.01	17	0	1.01	0.01	51	0	3.58	0.01	0	0	0.01	0.01	32	0	1.7	0.01	4	0	0.26	0.01	93	0	4.96	0.01	28	0	2	0.01	105	0	5.97	0.01	31	0	1.78	0.01	47	0	2.3	0.01
mdm-miR156eMIMAT0025871,mdm-miR156mMIMAT0025879,mdm-miR156iMIMAT0025875,mdm-miR156bMIMAT0025868,mdm-miR156hMIMAT0025874,mdm-miR156lMIMAT0025878,mdm-miR156nMIMAT0025880,mdm-miR156fMIMAT0025872,mdm-miR156jMIMAT0025876,mdm-miR156cMIMAT0025869,mdm-miR156gMIMAT0025873,mdm-miR156aMIMAT0025867,mdm-miR156dMIMAT0025870,mdm-miR156oMIMAT0025881,mdm-miR156kMIMAT0025877,aly-miR156a-5p,aly-miR156b-5p,aly-miR15…	5p	TGACAGAAGAGAGTGAGCAC	sly-miR156e-3p,stu-miR156g-3p	3p	GCTTACTCTCTATCTGTCACC	42	0	2.22	0.01	17	0	1.01	0.01	51	0	3.58	0.01	0	0	0.01	0.01	32	0	1.7	0.01	4	0	0.26	0.01	93	0	4.96	0.01	28	0	2	0.01	105	0	5.97	0.01	31	0	1.78	0.01	47	0	2.3	0.01
mdm-miR156eMIMAT0025871,mdm-miR156mMIMAT0025879,mdm-miR156iMIMAT0025875,mdm-miR156bMIMAT0025868,mdm-miR156hMIMAT0025874,mdm-miR156lMIMAT0025878,mdm-miR156nMIMAT0025880,mdm-miR156fMIMAT0025872,mdm-miR156jMIMAT0025876,mdm-miR156cMIMAT0025869,mdm-miR156gMIMAT0025873,mdm-miR156aMIMAT0025867,mdm-miR156dMIMAT0025870,mdm-miR156oMIMAT0025881,mdm-miR156kMIMAT0025877,aly-miR156a-5p,aly-miR156b-5p,aly-miR15…	5p	TGACAGAAGAGAGTGAGCAC	osa-miR156f-3p,osa-miR156h-3p,osa-miR156l-3p,zma-miR156d-3p,zma-miR156f-3p,zma-miR156g-3p	3p	GCTCACTTCTCTTTCTGTCAGC	42	0	2.22	0.01	17	0	1.01	0.01	51	0	3.58	0.01	0	0	0.01	0.01	32	0	1.7	0.01	4	0	0.26	0.01	93	0	4.96	0.01	28	0	2	0.01	105	0	5.97	0.01	31	0	1.78	0.01	47	0	2.3	0.01
mdm-miR156tMIMAT0025886,mdm-miR156uMIMAT0025887,mdm-miR156vMIMAT0025888,mdm-miR156wMIMAT0025889,ahy-miR156c,ahy-miR157k,ath-miR157m,can-miR157,far-miR156b,lsa-miR157,mdm-miR156t,mdm-miR156u,mdm-miR156v,mdm-miR156w,nbe-miR157a,nbe-miR157b,pam-miR157,par-miR157,pts-miR157,sin-miR157,vun-miR156f,zel-miR157,gba-miR156r,gba-miR156s	5p	TTGACAGAAGAGAGAGAGCAC	t08963541_x220*	3p	GCTTTCTCTTCTTCTGTCATCA	31	0	1.64	0.01	34	0	2.01	0.01	14	0	0.98	0.01	0	0	0.01	0.01	14	0	0.74	0.01	2	0	0.13	0.01	25	0	1.33	0.01	12	0	0.86	0.01	46	0	2.62	0.01	25	0	1.44	0.01	7	0	0.34	0.01
mdm-miR159aMIMAT0025898,mdm-miR159bMIMAT0025899,cpa-miR159b,mdm-miR159a,mdm-miR159b,sit-miR110-npr	3p	CTTGGATTGAAGGGAGCTCC	t00049581_x121746*	5p	AGCTCCCTTTGATTCAAAAG	8700	0	459.59	0.01	2606	0	154.12	0.01	2034	0	142.79	0.01	11350	0	947.4	0.01	3864	0	205.28	0.01	2337	0	149.48	0.01	25534	0	1362.72	0.01	4972	0	354.29	0.01	22304	0	1268.82	0.01	7987	4	458.82	0.23	8867	0	434.67	0.01
mdm-miR159aMIMAT0025898,mdm-miR159bMIMAT0025899,cpa-miR159b,mdm-miR159a,mdm-miR159b,sit-miR110-npr	3p	CTTGGATTGAAGGGAGCTCC	t00049581_x121746*	5p	AGCTCCTTTTGATTCAAAAG	8700	0	459.59	0.01	2606	0	154.12	0.01	2034	0	142.79	0.01	11350	0	947.4	0.01	3864	0	205.28	0.01	2337	0	149.48	0.01	25534	0	1362.72	0.01	4972	0	354.29	0.01	22304	0	1268.82	0.01	7987	0	458.82	0.01	8867	0	434.67	0.01
mdm-miR159dMIMAT0043539,mdm-miR159eMIMAT0043540,mdm-miR159fMIMAT0043541,ahy-miR159,aly-miR159a-3p,ath-miR159a,bna-miR159,bra-miR159a,cme-miR159a,cpa-miR159a,csi-miR159,gma-miR159a-3p,gma-miR159e-3p,hbr-miR159a,htu-miR159a,ltu-miR159,mes-miR159a,mes-miR159b,mtr-miR159a,nta-miR159,ppe-miR159,ptc-miR159a,ptc-miR159b,pvu-miR159a.1,rco-miR159,sly-miR159,vun-miR159a,vvi-miR159c,ghr-miR159b,gba-miR159b,…	3p	TTTGGATTGAAGGGAGCTCTA	t00931835_x1120521*	5p	GAGCTCCTTGAAGTCCAAAAG	149278	5	7885.8	0.26	95818	4	5666.81	0.24	74100	0	5202.01	0.01	74690	0	6234.49	0.01	73731	18	3917.02	0.96	58022	4	3711.25	0.26	166306	15	8875.59	0.8	42037	0	2995.46	0.01	194387	0	11058.2	0.01	35766	2	2054.6	0.11	70080	2	3435.43	0.1
mdm-miR162aMIMAT0025905,mdm-miR162bMIMAT0025906,aau-miR162,aly-miR162a-3p,aly-miR162b-3p,ath-miR162a,ath-miR162b,bra-miR162-3p,cme-miR162,cpa-miR162a,csi-miR162,gma-miR162b,gma-miR162c,hpe-miR162a,htu-miR162a,llu-miR162,lsa-miR162,lus-miR162a,lus-miR162b,mdm-miR162a,mdm-miR162b,mes-miR162,mtr-miR162,nta-miR162a,nta-miR162b,osa-miR162a,pde-miR162,ppe-miR162,ptc-miR162a,ptc-miR162b,rco-miR162,sbi-m…	3p	TCGATAAACCTCTGCATCCAG	aly-miR162a-5p,aly-miR162b-5p,bra-miR162-5p,stu-miR162a-5p,stu-miR162b-5p	5p	GGAGGCAGCGGTTCATCGATC	551	0	29.11	0.01	365	0	21.59	0.01	267	0	18.74	0.01	186	0	15.53	0.01	348	0	18.49	0.01	297	0	19	0.01	203	0	10.83	0.01	138	0	9.83	0.01	239	0	13.6	0.01	112	0	6.43	0.01	300	0	14.71	0.01
mdm-miR162aMIMAT0025905,mdm-miR162bMIMAT0025906,aau-miR162,aly-miR162a-3p,aly-miR162b-3p,ath-miR162a,ath-miR162b,bra-miR162-3p,cme-miR162,cpa-miR162a,csi-miR162,gma-miR162b,gma-miR162c,hpe-miR162a,htu-miR162a,llu-miR162,lsa-miR162,lus-miR162a,lus-miR162b,mdm-miR162a,mdm-miR162b,mes-miR162,mtr-miR162,nta-miR162a,nta-miR162b,osa-miR162a,pde-miR162,ppe-miR162,ptc-miR162a,ptc-miR162b,rco-miR162,sbi-m…	3p	TCGATAAACCTCTGCATCCAG	aly-miR162a-5p,aly-miR162b-5p,bra-miR162-5p,stu-miR162a-5p,stu-miR162b-5p	5p	GGAGGCAGCGGTTCATCGATC	551	0	29.11	0.01	365	0	21.59	0.01	267	0	18.74	0.01	186	0	15.53	0.01	348	0	18.49	0.01	297	0	19	0.01	203	0	10.83	0.01	138	0	9.83	0.01	239	0	13.6	0.01	112	0	6.43	0.01	300	0	14.71	0.01
mdm-miR164cMIMAT0025909,mdm-miR164dMIMAT0025910,mdm-miR164eMIMAT0025911,mdm-miR164bMIMAT0025908,mdm-miR164fMIMAT0025912,aly-miR164a-5p,aly-miR164b-5p,ath-miR164a,ath-miR164b,bdi-miR164a-5p,bdi-miR164b,bdi-miR164e,bna-miR164a,bra-miR164a,cav-miR164,cme-miR164c,cme-miR164d,cpa-miR164a,cpa-miR164b,cpa-miR164c,csi-miR164,ctr-miR164,gma-miR164a,gma-miR164e,gma-miR164f,gma-miR164g,gma-miR164h,gma-miR16…	5p	TGGAGAAGCAGGGCACGTGCA	t02194656_x5213*	3p	CACGTGCTCCCCCTCTCCAAC	739	22	39.04	1.16	793	12	46.9	0.71	403	5	28.29	0.35	159	31	13.27	2.59	459	32	24.38	1.7	293	12	18.74	0.77	706	81	37.68	4.32	179	17	12.76	1.21	995	84	56.6	4.78	90	33	5.17	1.9	190	16	9.31	0.78
mdm-miR164cMIMAT0025909,mdm-miR164dMIMAT0025910,mdm-miR164eMIMAT0025911,mdm-miR164bMIMAT0025908,mdm-miR164fMIMAT0025912,aly-miR164a-5p,aly-miR164b-5p,ath-miR164a,ath-miR164b,bdi-miR164a-5p,bdi-miR164b,bdi-miR164e,bna-miR164a,bra-miR164a,cav-miR164,cme-miR164c,cme-miR164d,cpa-miR164a,cpa-miR164b,cpa-miR164c,csi-miR164,ctr-miR164,gma-miR164a,gma-miR164e,gma-miR164f,gma-miR164g,gma-miR164h,gma-miR16…	5p	TGGAGAAGCAGGGCACGTGCA	t02194656_x5213*	3p	CATGTGCCCCTCTTCCCCATC	739	6	39.04	0.32	793	0	46.9	0.01	403	9	28.29	0.63	159	0	13.27	0.01	459	6	24.38	0.32	293	0	18.74	0.01	706	11	37.68	0.59	179	0	12.76	0.01	995	9	56.6	0.51	90	5	5.17	0.29	190	0	9.31	0.01
mdm-miR164cMIMAT0025909,mdm-miR164dMIMAT0025910,mdm-miR164eMIMAT0025911,mdm-miR164bMIMAT0025908,mdm-miR164fMIMAT0025912,aly-miR164a-5p,aly-miR164b-5p,ath-miR164a,ath-miR164b,bdi-miR164a-5p,bdi-miR164b,bdi-miR164e,bna-miR164a,bra-miR164a,cav-miR164,cme-miR164c,cme-miR164d,cpa-miR164a,cpa-miR164b,cpa-miR164c,csi-miR164,ctr-miR164,gma-miR164a,gma-miR164e,gma-miR164f,gma-miR164g,gma-miR164h,gma-miR16…	5p	TGGAGAAGCAGGGCACGTGCA	t02194656_x5213*	3p	CACGTGCTCCCCTTCTCCAAC	739	64	39.04	3.38	793	196	46.9	11.59	403	40	28.29	2.81	159	24	13.27	2	459	43	24.38	2.28	293	32	18.74	2.05	706	66	37.68	3.52	179	13	12.76	0.93	995	111	56.6	6.31	90	0	5.17	0.01	190	19	9.31	0.93
mdm-miR164cMIMAT0025909,mdm-miR164dMIMAT0025910,mdm-miR164eMIMAT0025911,mdm-miR164bMIMAT0025908,mdm-miR164fMIMAT0025912,aly-miR164a-5p,aly-miR164b-5p,ath-miR164a,ath-miR164b,bdi-miR164a-5p,bdi-miR164b,bdi-miR164e,bna-miR164a,bra-miR164a,cav-miR164,cme-miR164c,cme-miR164d,cpa-miR164a,cpa-miR164b,cpa-miR164c,csi-miR164,ctr-miR164,gma-miR164a,gma-miR164e,gma-miR164f,gma-miR164g,gma-miR164h,gma-miR16…	5p	TGGAGAAGCAGGGCACGTGCA	t02194656_x5213*	3p	CATGTGCCCCTCTTCCCCATC	739	6	39.04	0.32	793	0	46.9	0.01	403	9	28.29	0.63	159	0	13.27	0.01	459	6	24.38	0.32	293	0	18.74	0.01	706	11	37.68	0.59	179	0	12.76	0.01	995	9	56.6	0.51	90	5	5.17	0.29	190	0	9.31	0.01
mdm-miR166dMIMAT0025916,mdm-miR166bMIMAT0025914,mdm-miR166hMIMAT0025920,mdm-miR166eMIMAT0025917,mdm-miR166aMIMAT0025913,mdm-miR166iMIMAT0025921,mdm-miR166fMIMAT0025918,mdm-miR166gMIMAT0025919,mdm-miR166cMIMAT0025915,mdm-miR166jMIMAT0043545,aly-miR166a-3p,aly-miR166b-3p,aly-miR166c-3p,aly-miR166d-3p,aly-miR166e-3p,aly-miR166f-3p,aly-miR166g-3p,aly-miR166h-3p,aqc-miR166b,aqc-miR166e,ath-miR166a,ath…	3p	TCGGACCAGGCTTCATTCCCC	aly-miR166a-5p,aly-miR166c-5p,aly-miR166d-5p,bdi-miR166e-5p,csi-miR166e*,gma-miR166a-5p,gma-miR166c-5p,gma-miR166l,mtr-miR166g-5p,osa-miR166d-5p,stu-miR166a-5p,vun-miR166c*.1,vun-miR166c*.2,vun-miR166c*.3,vun-miR166c*.4,zma-miR166c-5p	5p	GGAATGTTGTCTGGCTCGAGG	1747791	133	92329.3	7.03	1218741	214	72078	12.66	1021288	178	71697.1	12.5	1545121	90	128974	7.51	802971	69	42658.5	3.67	981170	92	62758.4	5.88	1086168	89	57967.7	4.75	443716	126	31618.2	8.98	891166	122	50696.2	6.94	445694	47	25603.1	2.7	756349	125	37077.4	6.13
mdm-miR166dMIMAT0025916,mdm-miR166bMIMAT0025914,mdm-miR166hMIMAT0025920,mdm-miR166eMIMAT0025917,mdm-miR166aMIMAT0025913,mdm-miR166iMIMAT0025921,mdm-miR166fMIMAT0025918,mdm-miR166gMIMAT0025919,mdm-miR166cMIMAT0025915,mdm-miR166jMIMAT0043545,aly-miR166a-3p,aly-miR166b-3p,aly-miR166c-3p,aly-miR166d-3p,aly-miR166e-3p,aly-miR166f-3p,aly-miR166g-3p,aly-miR166h-3p,aqc-miR166b,aqc-miR166e,ath-miR166a,ath…	3p	TCGGACCAGGCTTCATTCCCC	t03215363_x13036982*	5p	GGAATGTTGTCTGGTACGAGG	1747791	0	92329.3	0.01	1218741	0	72078	0.01	1021288	0	71697.1	0.01	1545121	0	128974	0.01	802971	0	42658.5	0.01	981170	0	62758.4	0.01	1086168	0	57967.7	0.01	443716	0	31618.2	0.01	891166	0	50696.2	0.01	445694	0	25603.1	0.01	756349	0	37077.4	0.01
mdm-miR166dMIMAT0025916,mdm-miR166bMIMAT0025914,mdm-miR166hMIMAT0025920,mdm-miR166eMIMAT0025917,mdm-miR166aMIMAT0025913,mdm-miR166iMIMAT0025921,mdm-miR166fMIMAT0025918,mdm-miR166gMIMAT0025919,mdm-miR166cMIMAT0025915,mdm-miR166jMIMAT0043545,aly-miR166a-3p,aly-miR166b-3p,aly-miR166c-3p,aly-miR166d-3p,aly-miR166e-3p,aly-miR166f-3p,aly-miR166g-3p,aly-miR166h-3p,aqc-miR166b,aqc-miR166e,ath-miR166a,ath…	3p	TCGGACCAGGCTTCATTCCCC	t03215363_x13036982*	5p	GAAATGTTGTCTGGTTCGAGA	1747791	0	92329.3	0.01	1218741	0	72078	0.01	1021288	0	71697.1	0.01	1545121	0	128974	0.01	802971	0	42658.5	0.01	981170	5	62758.4	0.32	1086168	0	57967.7	0.01	443716	4	31618.2	0.29	891166	0	50696.2	0.01	445694	4	25603.1	0.23	756349	1	37077.4	0.05
mdm-miR166dMIMAT0025916,mdm-miR166bMIMAT0025914,mdm-miR166hMIMAT0025920,mdm-miR166eMIMAT0025917,mdm-miR166aMIMAT0025913,mdm-miR166iMIMAT0025921,mdm-miR166fMIMAT0025918,mdm-miR166gMIMAT0025919,mdm-miR166cMIMAT0025915,mdm-miR166jMIMAT0043545,aly-miR166a-3p,aly-miR166b-3p,aly-miR166c-3p,aly-miR166d-3p,aly-miR166e-3p,aly-miR166f-3p,aly-miR166g-3p,aly-miR166h-3p,aqc-miR166b,aqc-miR166e,ath-miR166a,ath…	3p	TCGGACCAGGCTTCATTCCCC	aly-miR166a-5p,aly-miR166c-5p,aly-miR166d-5p,bdi-miR166e-5p,csi-miR166e*,gma-miR166a-5p,gma-miR166c-5p,gma-miR166l,mtr-miR166g-5p,osa-miR166d-5p,stu-miR166a-5p,vun-miR166c*.1,vun-miR166c*.2,vun-miR166c*.3,vun-miR166c*.4,zma-miR166c-5p	5p	GGAATGTTGTCTGGCTCGAGG	1747791	133	92329.3	7.03	1218741	214	72078	12.66	1021288	178	71697.1	12.5	1545121	90	128974	7.51	802971	69	42658.5	3.67	981170	92	62758.4	5.88	1086168	89	57967.7	4.75	443716	126	31618.2	8.98	891166	122	50696.2	6.94	445694	47	25603.1	2.7	756349	125	37077.4	6.13
mdm-miR166dMIMAT0025916,mdm-miR166bMIMAT0025914,mdm-miR166hMIMAT0025920,mdm-miR166eMIMAT0025917,mdm-miR166aMIMAT0025913,mdm-miR166iMIMAT0025921,mdm-miR166fMIMAT0025918,mdm-miR166gMIMAT0025919,mdm-miR166cMIMAT0025915,mdm-miR166jMIMAT0043545,aly-miR166a-3p,aly-miR166b-3p,aly-miR166c-3p,aly-miR166d-3p,aly-miR166e-3p,aly-miR166f-3p,aly-miR166g-3p,aly-miR166h-3p,aqc-miR166b,aqc-miR166e,ath-miR166a,ath…	3p	TCGGACCAGGCTTCATTCCCC	aly-miR166a-5p,aly-miR166c-5p,aly-miR166d-5p,bdi-miR166e-5p,csi-miR166e*,gma-miR166a-5p,gma-miR166c-5p,gma-miR166l,mtr-miR166g-5p,osa-miR166d-5p,stu-miR166a-5p,vun-miR166c*.1,vun-miR166c*.2,vun-miR166c*.3,vun-miR166c*.4,zma-miR166c-5p	5p	GGAATGTTGTCTGGCTCGAGG	1747791	133	92329.3	7.03	1218741	214	72078	12.66	1021288	178	71697.1	12.5	1545121	90	128974	7.51	802971	69	42658.5	3.67	981170	92	62758.4	5.88	1086168	89	57967.7	4.75	443716	126	31618.2	8.98	891166	122	50696.2	6.94	445694	47	25603.1	2.7	756349	125	37077.4	6.13
mdm-miR166dMIMAT0025916,mdm-miR166bMIMAT0025914,mdm-miR166hMIMAT0025920,mdm-miR166eMIMAT0025917,mdm-miR166aMIMAT0025913,mdm-miR166iMIMAT0025921,mdm-miR166fMIMAT0025918,mdm-miR166gMIMAT0025919,mdm-miR166cMIMAT0025915,mdm-miR166jMIMAT0043545,aly-miR166a-3p,aly-miR166b-3p,aly-miR166c-3p,aly-miR166d-3p,aly-miR166e-3p,aly-miR166f-3p,aly-miR166g-3p,aly-miR166h-3p,aqc-miR166b,aqc-miR166e,ath-miR166a,ath…	3p	TCGGACCAGGCTTCATTCCCC	aly-miR166g-5p,gma-miR166h-5p,gma-miR166j-5p,stu-miR166c-5p	5p	GGAATGTTGTTTGGCTCGAGG	1747791	3	92329.3	0.16	1218741	14	72078	0.83	1021288	0	71697.1	0.01	1545121	0	128974	0.01	802971	18	42658.5	0.96	981170	0	62758.4	0.01	1086168	0	57967.7	0.01	443716	3	31618.2	0.21	891166	0	50696.2	0.01	445694	0	25603.1	0.01	756349	5	37077.4	0.25
mdm-miR167gMIMAT0025928,mdm-miR167cMIMAT0025924,mdm-miR167bMIMAT0025923,mdm-miR167fMIMAT0025927,mdm-miR167eMIMAT0025926,mdm-miR167dMIMAT0025925,aly-miR167a-5p,aly-miR167b-5p,ath-miR167a,ath-miR167b,bdi-miR167a,bdi-miR167b,bdi-miR167f,bna-miR167c,bra-miR167a,bra-miR167b,bra-miR167c,bra-miR167d,cme-miR167a,cme-miR167b,cpa-miR167a,cpa-miR167b,dpr-miR167a,dpr-miR167b,gma-miR167a,gma-miR167b,gma-miR16…	5p	TGAAGCTGCCAGCATGATCTA	t10905864_x6505*	3p	GATCATGTGGTAGCTTCACC	982	0	51.88	0.01	552	0	32.65	0.01	418	0	29.34	0.01	316	0	26.38	0.01	414	0	21.99	0.01	282	0	18.04	0.01	901	0	48.09	0.01	291	0	20.74	0.01	1246	0	70.88	0.01	382	0	21.94	0.01	497	4	24.36	0.2
mdm-miR167gMIMAT0025928,mdm-miR167cMIMAT0025924,mdm-miR167bMIMAT0025923,mdm-miR167fMIMAT0025927,mdm-miR167eMIMAT0025926,mdm-miR167dMIMAT0025925,aly-miR167a-5p,aly-miR167b-5p,ath-miR167a,ath-miR167b,bdi-miR167a,bdi-miR167b,bdi-miR167f,bna-miR167c,bra-miR167a,bra-miR167b,bra-miR167c,bra-miR167d,cme-miR167a,cme-miR167b,cpa-miR167a,cpa-miR167b,dpr-miR167a,dpr-miR167b,gma-miR167a,gma-miR167b,gma-miR16…	5p	TGAAGCTGCCAGCATGATCTA	t10905864_x6505*	3p	GATCATGTGGTAGCTTCACC	982	0	51.88	0.01	552	0	32.65	0.01	418	0	29.34	0.01	316	0	26.38	0.01	414	0	21.99	0.01	282	0	18.04	0.01	901	0	48.09	0.01	291	0	20.74	0.01	1246	0	70.88	0.01	382	0	21.94	0.01	497	4	24.36	0.2
mdm-miR167gMIMAT0025928,mdm-miR167cMIMAT0025924,mdm-miR167bMIMAT0025923,mdm-miR167fMIMAT0025927,mdm-miR167eMIMAT0025926,mdm-miR167dMIMAT0025925,aly-miR167a-5p,aly-miR167b-5p,ath-miR167a,ath-miR167b,bdi-miR167a,bdi-miR167b,bdi-miR167f,bna-miR167c,bra-miR167a,bra-miR167b,bra-miR167c,bra-miR167d,cme-miR167a,cme-miR167b,cpa-miR167a,cpa-miR167b,dpr-miR167a,dpr-miR167b,gma-miR167a,gma-miR167b,gma-miR16…	5p	TGAAGCTGCCAGCATGATCTA	t10905864_x6505*	3p	GGTCATGCTCTGACAGCTTCACT	982	73	51.88	3.86	552	80	32.65	4.73	418	56	29.34	3.93	316	0	26.38	0.01	414	71	21.99	3.77	282	33	18.04	2.11	901	51	48.09	2.72	291	68	20.74	4.85	1246	18	70.88	1.02	382	33	21.94	1.9	497	48	24.36	2.35
mdm-miR167gMIMAT0025928,mdm-miR167cMIMAT0025924,mdm-miR167bMIMAT0025923,mdm-miR167fMIMAT0025927,mdm-miR167eMIMAT0025926,mdm-miR167dMIMAT0025925,aly-miR167a-5p,aly-miR167b-5p,ath-miR167a,ath-miR167b,bdi-miR167a,bdi-miR167b,bdi-miR167f,bna-miR167c,bra-miR167a,bra-miR167b,bra-miR167c,bra-miR167d,cme-miR167a,cme-miR167b,cpa-miR167a,cpa-miR167b,dpr-miR167a,dpr-miR167b,gma-miR167a,gma-miR167b,gma-miR16…	5p	TGAAGCTGCCAGCATGATCTA	t10905864_x6505*	3p	GATCATGTGGTAGCTTCACC	982	0	51.88	0.01	552	0	32.65	0.01	418	0	29.34	0.01	316	0	26.38	0.01	414	0	21.99	0.01	282	0	18.04	0.01	901	0	48.09	0.01	291	0	20.74	0.01	1246	0	70.88	0.01	382	0	21.94	0.01	497	4	24.36	0.2
mdm-miR171bMIMAT0025939,mdm-miR171aMIMAT0025938,mdm-miR171pMIMAT0043582,ctr-miR171,mdm-miR171a,mdm-miR171b,ppe-miR171h,sit-miR14-npr	3p	TTGAGCCGCGTCAATATCTCC	t00967353_x40372*	5p	AGGTATTGGCGCGCCTCAATT	5071	0	267.88	0.01	3051	0	180.44	0.01	2420	0	169.89	0.01	1808	0	150.92	0.01	1705	0	90.58	0.01	1519	0	97.16	0.01	8220	0	438.69	0.01	1426	0	101.61	0.01	10196	0	580.02	0.01	1652	0	94.9	0.01	2331	0	114.27	0.01
mdm-miR171iMIMAT0025946,mdm-miR171i,sit-miR50-npr,stu-miR479	3p	TGAGCCGAACCAATATCACTC	t05671378_x974*	5p	GTGATATTGGTTTTGGCTCATA	108	0	5.71	0.01	51	0	3.02	0.01	60	0	4.21	0.01	0	0	0.01	0.01	62	0	3.29	0.01	49	0	3.13	0.01	180	0	9.61	0.01	18	0	1.28	0.01	355	0	20.2	0.01	31	0	1.78	0.01	29	0	1.42	0.01
mdm-miR171jMIMAT0025947,mdm-miR171kMIMAT0025948,mdm-miR171lMIMAT0025949,gma-miR171k-3p,lja-miR171d-5p,mdm-miR171j,mdm-miR171k,mdm-miR171l,nta-miR171b,ppe-miR171b,ssl-miR171b,vun-miR171f,vvi-miR171f,ghr-miR171j,ghr-miR171k,gba-miR171d,gba-miR171e,gba-miR171f,gba-miR171g,gba-miR171h,gba-miR171i	3p	TTGAGCCGCGCCAATATCACT	gma-miR171k-5p,gma-miR171l,lja-miR171d-3p,mtr-miR171e-5p	5p	CGATGTTGGTGAGGTTCAATC	94	0	4.97	0.01	65	0	3.84	0.01	18	0	1.26	0.01	34	0	2.84	0.01	17	0	0.9	0.01	28	0	1.79	0.01	44	0	2.35	0.01	20	0	1.43	0.01	12	0	0.68	0.01	21	8	1.21	0.46	43	7	2.11	0.34
mdm-miR171jMIMAT0025947,mdm-miR171kMIMAT0025948,mdm-miR171lMIMAT0025949,gma-miR171k-3p,lja-miR171d-5p,mdm-miR171j,mdm-miR171k,mdm-miR171l,nta-miR171b,ppe-miR171b,ssl-miR171b,vun-miR171f,vvi-miR171f,ghr-miR171j,ghr-miR171k,gba-miR171d,gba-miR171e,gba-miR171f,gba-miR171g,gba-miR171h,gba-miR171i	3p	TTGAGCCGCGCCAATATCACT	gma-miR171k-5p,gma-miR171l,lja-miR171d-3p,mtr-miR171e-5p	5p	CGATGTTGGTGAGGTTCAATC	94	0	4.97	0.01	65	0	3.84	0.01	18	0	1.26	0.01	34	0	2.84	0.01	17	0	0.9	0.01	28	0	1.79	0.01	44	0	2.35	0.01	20	0	1.43	0.01	12	0	0.68	0.01	21	8	1.21	0.46	43	7	2.11	0.34
mdm-miR319aMIMAT0025967,mdm-miR319b-3pMIMAT0025968,aau-miR319,acb-miR159,aha-miR159,ahi-miR159,aly-miR319a-3p,aly-miR319b-3p,amg-miR319,ape-miR159,aqc-miR319,ath-miR319a,ath-miR319b,bra-miR319-3p,bvl-miR159,cca-miR319,cmi-miR159,cor-miR159,crb-miR159,dso-miR159,ech-miR159,fal-miR159,gma-miR319h,gma-miR319j,gma-miR319k,gma-miR319m,hbr-miR319,lus-miR319a,mdm-miR319a,mdm-miR319b,mes-miR319a,mes-miR3…	3p	TTGGACTGAAGGGAGCTCCCT	t07404798_x118311*	5p	TGAGCTTTCTTCAGTCCACTC	16095	3	850.24	0.16	8992	9	531.8	0.53	6215	0	436.31	0.01	11823	0	986.88	0.01	8705	0	462.46	0.01	10212	0	653.19	0.01	13067	17	697.37	0.91	4492	3	320.09	0.21	12736	9	724.52	0.51	5444	0	312.73	0.01	6345	0	311.04	0.01
mdm-miR319aMIMAT0025967,mdm-miR319b-3pMIMAT0025968,aau-miR319,acb-miR159,aha-miR159,ahi-miR159,aly-miR319a-3p,aly-miR319b-3p,amg-miR319,ape-miR159,aqc-miR319,ath-miR319a,ath-miR319b,bra-miR319-3p,bvl-miR159,cca-miR319,cmi-miR159,cor-miR159,crb-miR159,dso-miR159,ech-miR159,fal-miR159,gma-miR319h,gma-miR319j,gma-miR319k,gma-miR319m,hbr-miR319,lus-miR319a,mdm-miR319a,mdm-miR319b,mes-miR319a,mes-miR3…	3p	TTGGACTGAAGGGAGCTCCCT	t07404798_x118311*	5p	AGAGCTTTCTTTAGTCCATTC	16095	3	850.24	0.16	8992	0	531.8	0.01	6215	0	436.31	0.01	11823	0	986.88	0.01	8705	0	462.46	0.01	10212	6	653.19	0.38	13067	10	697.37	0.53	4492	0	320.09	0.01	12736	0	724.52	0.01	5444	0	312.73	0.01	6345	7	311.04	0.34
mdm-miR319aMIMAT0025967,mdm-miR319b-3pMIMAT0025968,aau-miR319,acb-miR159,aha-miR159,ahi-miR159,aly-miR319a-3p,aly-miR319b-3p,amg-miR319,ape-miR159,aqc-miR319,ath-miR319a,ath-miR319b,bra-miR319-3p,bvl-miR159,cca-miR319,cmi-miR159,cor-miR159,crb-miR159,dso-miR159,ech-miR159,fal-miR159,gma-miR319h,gma-miR319j,gma-miR319k,gma-miR319m,hbr-miR319,lus-miR319a,mdm-miR319a,mdm-miR319b,mes-miR319a,mes-miR3…	3p	TTGGACTGAAGGGAGCTCCCT	t07404798_x118311*	5p	TGAGCTTTCTTCAGTCCACTC	16095	3	850.24	0.16	8992	9	531.8	0.53	6215	0	436.31	0.01	11823	0	986.88	0.01	8705	0	462.46	0.01	10212	0	653.19	0.01	13067	17	697.37	0.91	4492	3	320.09	0.21	12736	9	724.52	0.51	5444	0	312.73	0.01	6345	0	311.04	0.01
mdm-miR319aMIMAT0025967,mdm-miR319b-3pMIMAT0025968,aau-miR319,acb-miR159,aha-miR159,ahi-miR159,aly-miR319a-3p,aly-miR319b-3p,amg-miR319,ape-miR159,aqc-miR319,ath-miR319a,ath-miR319b,bra-miR319-3p,bvl-miR159,cca-miR319,cmi-miR159,cor-miR159,crb-miR159,dso-miR159,ech-miR159,fal-miR159,gma-miR319h,gma-miR319j,gma-miR319k,gma-miR319m,hbr-miR319,lus-miR319a,mdm-miR319a,mdm-miR319b,mes-miR319a,mes-miR3…	3p	TTGGACTGAAGGGAGCTCCCT	t07404798_x118311*	5p	AGAGCTTTCTTCAGTCCACTC	16095	68	850.24	3.59	8992	53	531.8	3.13	6215	14	436.31	0.98	11823	0	986.88	0.01	8705	16	462.46	0.85	10212	19	653.19	1.22	13067	76	697.37	4.06	4492	24	320.09	1.71	12736	106	724.52	6.03	5444	19	312.73	1.09	6345	27	311.04	1.32
mdm-miR319c-3pMIMAT0026058,mdm-miR319c	3p	ATCCAACGAAGCAGGAGCTGA	mtr-miR4414a-5p	5p	AGCTGCTGACTCGTTGGTTCA	1575	953	83.2	50.34	1120	596	66.24	35.25	803	409	56.37	28.71	862	1387	71.95	115.77	1700	785	90.31	41.7	1216	353	77.78	22.58	1870	2786	99.8	148.69	1056	743	75.25	52.94	2191	4430	124.64	252.01	950	944	54.57	54.23	1019	710	49.95	34.81
mdm-miR319dMIMAT0043552	5p	AACTGCCGACTCATTCACTCA	t11282223_x1105*	3p	TGTGAATGAAGCGGGAGATAT	105	1	5.55	0.05	70	0	4.14	0.01	59	0	4.14	0.01	32	0	2.67	0.01	69	0	3.67	0.01	89	0	5.69	0.01	204	12	10.89	0.64	121	1	8.62	0.07	141	0	8.02	0.01	35	0	2.01	0.01	116	0	5.69	0.01
mdm-miR3627bMIMAT0026017,mdm-miR3627cMIMAT0026018,mdm-miR3627aMIMAT0026016,mdm-miR3627a,mdm-miR3627b,mdm-miR3627c	5p	TCGCAGGAGAGATGGCACTA	t01201592_x105*	3p	TTGCCATCTCTCCTGTGACC	26	10	1.37	0.53	0	5	0.01	0.3	20	14	1.4	0.98	35	0	2.92	0.01	0	0	0.01	0.01	14	12	0.9	0.77	0	8	0.01	0.43	0	3	0.01	0.21	0	33	0.01	1.88	1	0	0.06	0.01	9	5	0.44	0.25
mdm-miR390eMIMAT0025973,mdm-miR390aMIMAT0025969,mdm-miR390dMIMAT0025972,mdm-miR390cMIMAT0025971,mdm-miR390fMIMAT0025974,mdm-miR390bMIMAT0025970,aly-miR390a-5p,aly-miR390b-5p,ath-miR390a,ath-miR390b,bdi-miR390a-5p,bna-miR390a,bna-miR390b,bna-miR390c,bra-miR390-5p,cme-miR390a,cme-miR390b,cme-miR390c,cme-miR390d,cpa-miR390a,cpa-miR390b,csi-miR390,gma-miR390a-5p,gma-miR390f,gma-miR390g,hex-miR390a,he…	5p	AAGCTCAGGAGGGATAGCGCC	aly-miR390a-3p,lja-miR390a-3p,lja-miR390b-3p,sly-miR390b-3p,gba-miR390j	3p	CGCTATCCATCCTGAGTTTCA	297	0	15.69	0.01	191	0	11.3	0.01	161	0	11.3	0.01	79	0	6.59	0.01	85	0	4.52	0.01	216	0	13.82	0.01	215	3	11.47	0.16	171	0	12.19	0.01	294	0	16.72	0.01	480	0	27.57	0.01	710	5	34.81	0.25
mdm-miR390eMIMAT0025973,mdm-miR390aMIMAT0025969,mdm-miR390dMIMAT0025972,mdm-miR390cMIMAT0025971,mdm-miR390fMIMAT0025974,mdm-miR390bMIMAT0025970,aly-miR390a-5p,aly-miR390b-5p,ath-miR390a,ath-miR390b,bdi-miR390a-5p,bna-miR390a,bna-miR390b,bna-miR390c,bra-miR390-5p,cme-miR390a,cme-miR390b,cme-miR390c,cme-miR390d,cpa-miR390a,cpa-miR390b,csi-miR390,gma-miR390a-5p,gma-miR390f,gma-miR390g,hex-miR390a,he…	5p	AAGCTCAGGAGGGATAGCGCC	t01972447_x3459*	3p	CGCTATCCATCTTGGGCTTCA	297	17	15.69	0.9	191	14	11.3	0.83	161	11	11.3	0.77	79	0	6.59	0.01	85	0	4.52	0.01	216	12	13.82	0.77	215	89	11.47	4.75	171	4	12.19	0.29	294	114	16.72	6.49	480	3	27.57	0.17	710	7	34.81	0.34
mdm-miR390eMIMAT0025973,mdm-miR390aMIMAT0025969,mdm-miR390dMIMAT0025972,mdm-miR390cMIMAT0025971,mdm-miR390fMIMAT0025974,mdm-miR390bMIMAT0025970,aly-miR390a-5p,aly-miR390b-5p,ath-miR390a,ath-miR390b,bdi-miR390a-5p,bna-miR390a,bna-miR390b,bna-miR390c,bra-miR390-5p,cme-miR390a,cme-miR390b,cme-miR390c,cme-miR390d,cpa-miR390a,cpa-miR390b,csi-miR390,gma-miR390a-5p,gma-miR390f,gma-miR390g,hex-miR390a,he…	5p	AAGCTCAGGAGGGATAGCGCC	aly-miR390a-3p,lja-miR390a-3p,lja-miR390b-3p,sly-miR390b-3p,gba-miR390j	3p	CGCTATCCATCCTGAGTTTCA	297	0	15.69	0.01	191	0	11.3	0.01	161	0	11.3	0.01	79	0	6.59	0.01	85	0	4.52	0.01	216	0	13.82	0.01	215	3	11.47	0.16	171	0	12.19	0.01	294	0	16.72	0.01	480	0	27.57	0.01	710	5	34.81	0.25
mdm-miR390eMIMAT0025973,mdm-miR390aMIMAT0025969,mdm-miR390dMIMAT0025972,mdm-miR390cMIMAT0025971,mdm-miR390fMIMAT0025974,mdm-miR390bMIMAT0025970,aly-miR390a-5p,aly-miR390b-5p,ath-miR390a,ath-miR390b,bdi-miR390a-5p,bna-miR390a,bna-miR390b,bna-miR390c,bra-miR390-5p,cme-miR390a,cme-miR390b,cme-miR390c,cme-miR390d,cpa-miR390a,cpa-miR390b,csi-miR390,gma-miR390a-5p,gma-miR390f,gma-miR390g,hex-miR390a,he…	5p	AAGCTCAGGAGGGATAGCGCC	aly-miR390a-3p,lja-miR390a-3p,lja-miR390b-3p,sly-miR390b-3p,gba-miR390j	3p	CGCTATCCATCCTGAGTTTCA	297	0	15.69	0.01	191	0	11.3	0.01	161	0	11.3	0.01	79	0	6.59	0.01	85	0	4.52	0.01	216	0	13.82	0.01	215	3	11.47	0.16	171	0	12.19	0.01	294	0	16.72	0.01	480	0	27.57	0.01	710	5	34.81	0.25
mdm-miR393cMIMAT0025977,mdm-miR393bMIMAT0025976,mdm-miR393aMIMAT0025975,mdm-miR393a,mdm-miR393b,mdm-miR393c,mes-miR393c,mes-miR393d,osa-miR393b-5p,zma-miR393a-5p,zma-miR393c-5p,ghr-miR393f	5p	TCCAAAGGGATCGCATTGATCT	mdm-miR393fMIMAT0026063,mdm-miR393dMIMAT0026061,mdm-miR393eMIMAT0026062,mdm-miR393d,mdm-miR393e,mdm-miR393f	3p	ATCATGCGATCCCTTCGGACG	779	0	41.15	0.01	591	0	34.95	0.01	382	0	26.82	0.01	394	0	32.89	0.01	423	0	22.47	0.01	371	0	23.73	0.01	725	3	38.69	0.16	134	0	9.55	0.01	779	0	44.32	0.01	179	0	10.28	0.01	272	0	13.33	0.01
mdm-miR393cMIMAT0025977,mdm-miR393bMIMAT0025976,mdm-miR393aMIMAT0025975,mdm-miR393a,mdm-miR393b,mdm-miR393c,mes-miR393c,mes-miR393d,osa-miR393b-5p,zma-miR393a-5p,zma-miR393c-5p,ghr-miR393f	5p	TCCAAAGGGATCGCATTGATCT	mdm-miR393fMIMAT0026063,mdm-miR393dMIMAT0026061,mdm-miR393eMIMAT0026062,mdm-miR393d,mdm-miR393e,mdm-miR393f	3p	ATCATGCGATCCCTTCGGACG	779	0	41.15	0.01	591	0	34.95	0.01	382	0	26.82	0.01	394	0	32.89	0.01	423	0	22.47	0.01	371	0	23.73	0.01	725	3	38.69	0.16	134	0	9.55	0.01	779	0	44.32	0.01	179	0	10.28	0.01	272	0	13.33	0.01
mdm-miR394aMIMAT0025978,mdm-miR394bMIMAT0025979,ahy-miR394,aly-miR394a-5p,aly-miR394b-5p,ath-miR394a,ath-miR394b,bdi-miR394,bna-miR394a,bna-miR394b,cca-miR394,cme-miR394a,cme-miR394b,cpa-miR394a,cpa-miR394b,csi-miR394,gma-miR394a-5p,gma-miR394b-5p,gma-miR394c-5p,gma-miR394d,gma-miR394e,gma-miR394f,gma-miR394g,lus-miR394a,lus-miR394b,mdm-miR394a,mdm-miR394b,mes-miR394a,mes-miR394b,nta-miR394,osa-m…	5p	TTGGCATTCTGTCCACCTCC	t02013350_x8463*	3p	AGGTGGGCATACTGCCAACA	1169	0	61.75	0.01	1291	0	76.35	0.01	675	0	47.39	0.01	264	0	22.04	0.01	469	0	24.92	0.01	519	0	33.2	0.01	1270	0	67.78	0.01	196	0	13.97	0.01	1518	0	86.36	0.01	505	0	29.01	0.01	553	0	27.11	0.01
mdm-miR394aMIMAT0025978,mdm-miR394bMIMAT0025979,ahy-miR394,aly-miR394a-5p,aly-miR394b-5p,ath-miR394a,ath-miR394b,bdi-miR394,bna-miR394a,bna-miR394b,cca-miR394,cme-miR394a,cme-miR394b,cpa-miR394a,cpa-miR394b,csi-miR394,gma-miR394a-5p,gma-miR394b-5p,gma-miR394c-5p,gma-miR394d,gma-miR394e,gma-miR394f,gma-miR394g,lus-miR394a,lus-miR394b,mdm-miR394a,mdm-miR394b,mes-miR394a,mes-miR394b,nta-miR394,osa-m…	5p	TTGGCATTCTGTCCACCTCC	t02013350_x8463*	3p	AGGTGGGCATACTGCCAACA	1169	0	61.75	0.01	1291	0	76.35	0.01	675	0	47.39	0.01	264	0	22.04	0.01	469	0	24.92	0.01	519	0	33.2	0.01	1270	0	67.78	0.01	196	0	13.97	0.01	1518	0	86.36	0.01	505	0	29.01	0.01	553	0	27.11	0.01
mdm-miR396dMIMAT0025992,mdm-miR396eMIMAT0025993,mdm-miR396cMIMAT0025991,aly-miR396b-5p,aqc-miR396b,ath-miR396b,avm-miR396-5p,bcy-miR396b,bdi-miR396e-5p,bgy-miR396b,bna-miR396a,bra-miR396-5p,cca-miR396a-5p,ccl-miR396,cme-miR396a,cme-miR396c,cme-miR396d,gma-miR396b-5p,gma-miR396c,lus-miR396b,lus-miR396e,mdm-miR396c,mdm-miR396d,mdm-miR396e,mes-miR396c,mes-miR396d,mes-miR396e,mes-miR396f,mtr-miR396a-…	5p	TTCCACAGCTTTCTTGAACTT	gma-miR396b-3p,gma-miR396k,mtr-miR396a-3p,vun-miR396b*,ghr-miR396b,ghr-miR396c	3p	GCTCAAGAAAGCTGTGGGAGA	5114	14	270.15	0.74	4280	0	253.13	0.01	2870	0	201.48	0.01	945	0	78.88	0.01	2399	0	127.45	0.01	2252	6	144.04	0.38	3182	8	169.82	0.43	1176	0	83.8	0.01	2682	15	152.57	0.85	1480	1	85.02	0.06	2327	3	114.07	0.15
mdm-miR396dMIMAT0025992,mdm-miR396eMIMAT0025993,mdm-miR396cMIMAT0025991,aly-miR396b-5p,aqc-miR396b,ath-miR396b,avm-miR396-5p,bcy-miR396b,bdi-miR396e-5p,bgy-miR396b,bna-miR396a,bra-miR396-5p,cca-miR396a-5p,ccl-miR396,cme-miR396a,cme-miR396c,cme-miR396d,gma-miR396b-5p,gma-miR396c,lus-miR396b,lus-miR396e,mdm-miR396c,mdm-miR396d,mdm-miR396e,mes-miR396c,mes-miR396d,mes-miR396e,mes-miR396f,mtr-miR396a-…	5p	TTCCACAGCTTTCTTGAACTT	gma-miR396b-3p,gma-miR396k,mtr-miR396a-3p,vun-miR396b*,ghr-miR396b,ghr-miR396c	3p	GCTCAAGAAAGCTGTGGGAGA	5114	14	270.15	0.74	4280	0	253.13	0.01	2870	0	201.48	0.01	945	0	78.88	0.01	2399	0	127.45	0.01	2252	6	144.04	0.38	3182	8	169.82	0.43	1176	0	83.8	0.01	2682	15	152.57	0.85	1480	1	85.02	0.06	2327	3	114.07	0.15
mdm-miR396gMIMAT0025995,mdm-miR396fMIMAT0025994,cme-miR396e,mdm-miR396f,mdm-miR396g,ptc-miR396f	5p	TTCCACGGCTTTCTTGAACTG	t03238606_x2829*	3p	GTTCAAGAAAGCTGTGAAAA	339	0	17.91	0.01	312	0	18.45	0.01	122	0	8.56	0.01	483	0	40.32	0.01	142	0	7.54	0.01	234	0	14.97	0.01	200	0	10.67	0.01	101	0	7.2	0.01	132	0	7.51	0.01	77	0	4.42	0.01	65	0	3.19	0.01
mdm-miR396gMIMAT0025995,mdm-miR396fMIMAT0025994,cme-miR396e,mdm-miR396f,mdm-miR396g,ptc-miR396f	5p	TTCCACGGCTTTCTTGAACTG	t03238606_x2829*	3p	GTTCAAGAAAGCTGTGAAAAA	339	0	17.91	0.01	312	0	18.45	0.01	122	0	8.56	0.01	483	0	40.32	0.01	142	0	7.54	0.01	234	0	14.97	0.01	200	0	10.67	0.01	101	0	7.2	0.01	132	0	7.51	0.01	77	0	4.42	0.01	65	0	3.19	0.01
mdm-miR403aMIMAT0026011,mdm-miR403bMIMAT0026012,aly-miR403a-3p,aly-miR403b-3p,ath-miR403,bna-miR403,bra-miR403-3p,bst-miR403,csi-miR403,har-miR403a,hpe-miR403a,htu-miR403a,htu-miR403b,htu-miR403c,htu-miR403d,htu-miR403e,mdm-miR403a,mdm-miR403b,mes-miR403a,mes-miR403b,ppe-miR403,ppl-miR403,ptc-miR403a,ptc-miR403b,ptc-miR403c-3p,ptc-miR403d,rco-miR403a,rco-miR403b,tcc-miR403a,tcc-miR403b,vvi-miR403…	3p	TTAGATTCACGCACAAACTCG	t07475792_x3958*	5p	AGTTTGTGCGTGAATCGAACC	474	0	25.04	0.01	427	0	25.25	0.01	275	0	19.31	0.01	127	0	10.6	0.01	487	0	25.87	0.01	393	4	25.14	0.26	331	0	17.67	0.01	233	0	16.6	0.01	431	0	24.52	0.01	171	0	9.82	0.01	198	0	9.71	0.01
mdm-miR403aMIMAT0026011,mdm-miR403bMIMAT0026012,aly-miR403a-3p,aly-miR403b-3p,ath-miR403,bna-miR403,bra-miR403-3p,bst-miR403,csi-miR403,har-miR403a,hpe-miR403a,htu-miR403a,htu-miR403b,htu-miR403c,htu-miR403d,htu-miR403e,mdm-miR403a,mdm-miR403b,mes-miR403a,mes-miR403b,ppe-miR403,ppl-miR403,ptc-miR403a,ptc-miR403b,ptc-miR403c-3p,ptc-miR403d,rco-miR403a,rco-miR403b,tcc-miR403a,tcc-miR403b,vvi-miR403…	3p	TTAGATTCACGCACAAACTCG	t07475792_x3958*	5p	AGTTTGTGCCTGAATCAAACC	474	0	25.04	0.01	427	0	25.25	0.01	275	0	19.31	0.01	127	0	10.6	0.01	487	0	25.87	0.01	393	0	25.14	0.01	331	0	17.67	0.01	233	0	16.6	0.01	431	0	24.52	0.01	171	6	9.82	0.34	198	4	9.71	0.2
mdm-miR477bMIMAT0026020,mdm-miR477b	3p	ACTCTCCCTCAAGGGCTTCGAC	t05345520_x484*	5p	TGGAGCTCGTGGGGGAGAACGA	37	0	1.95	0.01	72	0	4.26	0.01	70	0	4.91	0.01	43	0	3.59	0.01	29	0	1.54	0.01	33	0	2.11	0.01	34	0	1.81	0.01	10	0	0.71	0.01	134	0	7.62	0.01	14	0	0.8	0.01	8	0	0.39	0.01
mdm-miR482bMIMAT0026022,mdm-miR482b	3p	TCTTTCCTATCCCTCCCATTCC	mdm-miR482dMIMAT0026039,mdm-miR482d	5p	AATGGAAGGGTAGGAAAGAAG	17997	6185	950.71	326.73	17863	4331	1056.44	256.14	9450	3261	663.41	228.93	10295	3144	859.34	262.43	6298	3715	334.59	197.36	6641	3037	424.78	194.26	27725	6754	1479.66	360.45	4279	2834	304.91	201.94	32213	7900	1832.52	449.41	5593	3210	321.29	184.4	8637	5220	423.4	255.89
mdm-miR482cMIMAT0026023,mdm-miR482c	3p	TCTTTCCTAACCCTCCCATTCC	t01133612_x128481*	5p	AGTGGAAGGGTAGGAAAGAAG	15867	871	838.19	46.01	18454	747	1091.39	44.18	8880	566	623.4	39.73	7812	285	652.08	23.79	6171	318	327.84	16.89	5714	309	365.48	19.76	20324	1075	1084.67	57.37	3842	599	273.77	42.68	24190	917	1376.11	52.17	5489	731	315.32	41.99	8170	993	400.51	48.68
mdm-miR5225cMIMAT0026052,mdm-miR5225c	5p	TCTGTCGTGGGTGAGATGGTGC	t02453564_x45109*	3p	TTCATCTCTCCTCGACAGAAG	3174	927	167.67	48.97	1383	785	81.79	46.43	1615	436	113.38	30.61	1067	101	89.06	8.43	992	387	52.7	20.56	882	369	56.42	23.6	10286	925	548.95	49.37	1232	274	87.79	19.52	8893	1099	505.9	62.52	3184	259	182.91	14.88	7324	393	359.03	19.27
mdm-miR535dMIMAT0026027,mdm-miR535d,ppe-miR535b	5p	TGACGACGAGAGAGAGCACGC	t08616746_x1981*	3p	GTGCTCTTTCTTGTTGTCATA	273	0	14.42	0.01	159	0	9.4	0.01	126	0	8.85	0.01	38	0	3.17	0.01	138	0	7.33	0.01	202	0	12.92	0.01	279	0	14.89	0.01	80	0	5.7	0.01	430	0	24.46	0.01	82	0	4.71	0.01	174	0	8.53	0.01
mdm-miR7121cMIMAT0026042,mdm-miR7121bMIMAT0026041,mdm-miR7121aMIMAT0026040,mdm-miR7121a,mdm-miR7121b,mdm-miR7121c	5p	TCCTCTTGGTGATCGCCCTGT	t08548178_x8165*	3p	AGGGTGATTAACAAAGGGATG	944	18	49.87	0.95	668	36	39.51	2.13	276	19	19.38	1.33	537	0	44.82	0.01	411	70	21.83	3.72	322	13	20.6	0.83	1439	79	76.8	4.22	426	55	30.36	3.92	2001	44	113.83	2.5	367	8	21.08	0.46	321	31	15.74	1.52
mdm-miR7121eMIMAT0026044,mdm-miR7121dMIMAT0026043,mdm-miR7121hMIMAT0026047,mdm-miR7121gMIMAT0026046,mdm-miR7121fMIMAT0026045,mdm-miR7121d,mdm-miR7121e,mdm-miR7121f,mdm-miR7121g,mdm-miR7121h	5p	TCCTCTTGGTGATCGCCCTGC	t03877397_x10553*	3p	AGGGTGGTTACCAATGGGATG	922	16	48.71	0.85	500	19	29.57	1.12	340	0	23.87	0.01	1107	24	92.4	2	387	0	20.56	0.01	314	6	20.08	0.38	2714	38	144.84	2.03	238	16	16.96	1.14	3067	55	174.47	3.13	306	5	17.58	0.29	391	18	19.17	0.88
mdm-miR7121eMIMAT0026044,mdm-miR7121dMIMAT0026043,mdm-miR7121hMIMAT0026047,mdm-miR7121gMIMAT0026046,mdm-miR7121fMIMAT0026045,mdm-miR7121d,mdm-miR7121e,mdm-miR7121f,mdm-miR7121g,mdm-miR7121h	5p	TCCTCTTGGTGATCGCCCTGC	t03877397_x10553*	3p	AGGGTGGTTACCAATGGGATG	922	16	48.71	0.85	500	19	29.57	1.12	340	0	23.87	0.01	1107	24	92.4	2	387	0	20.56	0.01	314	6	20.08	0.38	2714	38	144.84	2.03	238	16	16.96	1.14	3067	55	174.47	3.13	306	5	17.58	0.29	391	18	19.17	0.88
mdm-miR7122aMIMAT0026048,mdm-miR7122bMIMAT0026049,mdm-miR7122a,mdm-miR7122b	5p	TTATACAGAGAAATCACGGTCG	t00367229_x353*	3p	ACCGTGTTTTTCTGTATAAA	39	0	2.06	0.01	8	0	0.47	0.01	0	0	0.01	0.01	69	0	5.76	0.01	11	0	0.58	0.01	21	0	1.34	0.01	41	0	2.19	0.01	3	0	0.21	0.01	44	0	2.5	0.01	41	0	2.36	0.01	19	0	0.93	0.01
mdm-miR7122aMIMAT0026048,mdm-miR7122bMIMAT0026049,mdm-miR7122a,mdm-miR7122b	5p	TTATACAGAGAAATCACGGTCG	t00367229_x353*	3p	ACCGTGTTTCTCTGTATAAAGA	39	0	2.06	0.01	8	0	0.47	0.01	0	0	0.01	0.01	69	0	5.76	0.01	11	0	0.58	0.01	21	0	1.34	0.01	41	0	2.19	0.01	3	0	0.21	0.01	44	0	2.5	0.01	41	0	2.36	0.01	19	0	0.93	0.01
mdm-miR7126-3pMIMAT0037475	3p	TTGCGTTCCACTGATTCTTTCG	mdm-miR7126-5pMIMAT0026060,mdm-miR7126	5p	AAAGTATCAAGGAGCGCAAAG	193	202	10.2	10.67	166	173	9.82	10.23	126	112	8.85	7.86	236	43	19.7	3.59	137	153	7.28	8.13	126	149	8.06	9.53	144	254	7.69	13.56	66	96	4.7	6.84	79	240	4.49	13.65	62	150	3.56	8.62	105	289	5.15	14.17
mtr-miR4414a-5p	5p	AGCTGCTGACTCGTTGGTTCA	t09159324_x14519*	3p	ATCCAACGAAGCAGGAGCCGA	953	25	50.34	1.32	596	7	35.25	0.41	409	10	28.71	0.7	1387	0	115.77	0.01	785	19	41.7	1.01	353	33	22.58	2.11	2786	6	148.69	0.32	743	11	52.94	0.78	4430	35	252.01	1.99	944	18	54.23	1.03	710	0	34.81	0.01
t00123765_x612	3p	ATAGAATGAGATTTTTGGAGTGCC	t00123765_x612*	5p	CACTCCAAAAATCTCATTCTACAC	62	0	3.28	0.01	59	0	3.49	0.01	12	0	0.84	0.01	41	0	3.42	0.01	69	0	3.67	0.01	54	0	3.45	0.01	39	0	2.08	0.01	72	0	5.13	0.01	18	0	1.02	0.01	27	0	1.55	0.01	79	0	3.87	0.01
t00205877_x43290	3p	ACGGTGATAAATAGGGTAGTGAGC	t00205877_x43290*	5p	TCATCACCCTATTTATCACCGTTG	4542	0	239.94	0.01	4228	0	250.05	0.01	2452	0	172.14	0.01	3395	0	283.39	0.01	6078	0	322.9	0.01	3965	0	253.61	0.01	5462	0	291.5	0.01	4213	0	300.21	0.01	3514	0	199.9	0.01	1333	0	76.57	0.01	2023	0	99.17	0.01
t00370463_x599	5p	ATCCCGTGATCGTGACCGTTCATC	t00370463_x599*	3p	TGAACGGTCACGATCACGGAATCC	72	0	3.8	0.01	13	0	0.77	0.01	32	0	2.25	0.01	34	0	2.84	0.01	95	0	5.05	0.01	34	0	2.17	0.01	7	0	0.37	0.01	21	0	1.5	0.01	9	0	0.51	0.01	55	0	3.16	0.01	87	0	4.26	0.01
t00403975_x734	5p	ATCCTCAAATCGTGTCTGTTCATC	t00403975_x734*	3p	TGAACGAACATAATTTGAGGATCC	43	0	2.27	0.01	44	0	2.6	0.01	1	0	0.07	0.01	67	0	5.59	0.01	36	0	1.91	0.01	20	0	1.28	0.01	41	0	2.19	0.01	92	0	6.56	0.01	41	0	2.33	0.01	125	0	7.18	0.01	129	0	6.32	0.01
t00557558_x407	3p	AGGACTCGTTTTAGCCCTCTGGCC	t00557558_x407*	5p	CTAGAGGGCTCAAACGAGCCCTCT	25	0	1.32	0.01	29	0	1.72	0.01	10	0	0.7	0.01	0	0	0.01	0.01	66	0	3.51	0.01	51	0	3.26	0.01	10	0	0.53	0.01	24	0	1.71	0.01	37	0	2.1	0.01	80	0	4.6	0.01	47	0	2.3	0.01
t00614980_x824	5p	TCAGATGGTAGAAAGGATGCAA	t00614980_x824*	3p	GCATGCTCGCTACTATCTGAAG	120	0	6.34	0.01	60	0	3.55	0.01	24	0	1.68	0.01	104	0	8.68	0.01	36	0	1.91	0.01	51	0	3.26	0.01	153	0	8.17	0.01	16	0	1.14	0.01	130	0	7.4	0.01	16	0	0.92	0.01	40	0	1.96	0.01
t00682504_x188	5p	ATGTCATTTCGGGCTATTTTCGGC	t00682504_x188*	3p	TGAAAATAGCCTAAAATGACACGA	25	0	1.32	0.01	0	0	0.01	0.01	0	0	0.01	0.01	47	0	3.92	0.01	13	0	0.69	0.01	22	0	1.41	0.01	29	0	1.55	0.01	9	0	0.64	0.01	0	0	0.01	0.01	5	0	0.29	0.01	38	0	1.86	0.01
t00969484_x10829	3p	GTGTCTGAGAGGTAAAAAGGGGTG	t00969484_x10829*	5p	TCCATTTTTACTTCTCACACATCC	922	0	48.71	0.01	854	0	50.51	0.01	542	0	38.05	0.01	624	0	52.09	0.01	1543	0	81.97	0.01	1159	0	74.13	0.01	1435	0	76.58	0.01	1327	0	94.56	0.01	996	0	56.66	0.01	394	0	22.63	0.01	687	0	33.68	0.01
t01047916_x221	3p	ATCAAATTTCAACAGTCCGGATCC	t01047916_x221*	5p	ATTCGGATCATTGAAATTTGATCT	11	0	0.58	0.01	12	0	0.71	0.01	3	0	0.21	0.01	31	0	2.59	0.01	46	0	2.44	0.01	12	0	0.77	0.01	31	0	1.65	0.01	11	0	0.78	0.01	19	0	1.08	0.01	29	0	1.67	0.01	16	0	0.78	0.01
t01106153_x1640	5p	TGCCTCCATTTAATTGTCACGACC	t01106153_x1640*	3p	TTGTGACAATTAAATGAAGGCAGA	210	0	11.09	0.01	145	0	8.58	0.01	126	0	8.85	0.01	74	0	6.18	0.01	189	0	10.04	0.01	82	0	5.24	0.01	143	0	7.63	0.01	72	0	5.13	0.01	339	0	19.28	0.01	143	0	8.21	0.01	117	0	5.74	0.01
t01163329_x11463	3p	GTTTTTGAATGAAAGGCTCATGTG	t01163329_x11463*	5p	CATGGGTCTTTCATTCAAAAATAT	975	10	51.51	0.53	534	0	31.58	0.01	402	0	28.22	0.01	603	0	50.33	0.01	1358	0	72.14	0.01	1025	0	65.56	0.01	1621	0	86.51	0.01	963	0	68.62	0.01	1244	0	70.77	0.01	1060	0	60.89	0.01	1114	0	54.61	0.01
t01282844_x8805	3p	AGGAGTGTGTGAGAAGTAAAAAGG	t01282844_x8805*	5p	TTTTTACTTCTCTCACACCTTTT	558	0	29.48	0.01	879	0	51.99	0.01	456	0	32.01	0.01	405	0	33.81	0.01	830	0	44.09	0.01	784	0	50.15	0.01	772	0	41.2	0.01	725	0	51.66	0.01	288	0	16.38	0.01	612	0	35.16	0.01	1613	0	79.07	0.01
t01354282_x300	3p	ATCCGTGGACTTTGGTGGAAGAGA	t01354282_x300*	5p	TCTTCCACCAAATCACACGGATCA	17	0	0.9	0.01	72	0	4.26	0.01	27	0	1.9	0.01	36	0	3	0.01	0	0	0.01	0.01	41	0	2.62	0.01	41	0	2.19	0.01	4	0	0.29	0.01	6	0	0.34	0.01	10	0	0.57	0.01	46	0	2.25	0.01
t01416056_x386	3p	AGTGTAGAATGAGATGTTTGGAGT	t01416056_x386*	5p	TCCAAAAATCTCATTCTACACTCC	33	5	1.74	0.26	56	20	3.31	1.18	46	34	3.23	2.39	0	0	0.01	0.01	36	23	1.91	1.22	34	15	2.17	0.96	17	13	0.91	0.69	24	4	1.71	0.29	2	0	0.11	0.01	73	5	4.19	0.29	27	9	1.32	0.44
t01565772_x621	5p	ATATTCGTTCATCGTACATCGTGC	t01565772_x621*	3p	ACAATGTACGATGAATGAACACTA	37	0	1.95	0.01	33	0	1.95	0.01	0	0	0.01	0.01	0	0	0.01	0.01	73	0	3.88	0.01	45	0	2.88	0.01	86	0	4.59	0.01	23	0	1.64	0.01	56	0	3.19	0.01	103	0	5.92	0.01	96	0	4.71	0.01
t01579770_x124	5p	CATCGGGCCGTTCAAATTTTATC	t01579770_x124*	3p	TAAAATTTGAACGGTCCGATAAA	17	0	0.9	0.01	42	0	2.48	0.01	8	0	0.56	0.01	0	0	0.01	0.01	0	0	0.01	0.01	7	0	0.45	0.01	18	0	0.96	0.01	4	0	0.29	0.01	0	0	0.01	0.01	19	0	1.09	0.01	9	0	0.44	0.01
t01640484_x552	3p	AGTAAAATGGGGTATGTGGATATC	t01640484_x552*	5p	TATCCACACACCCCAAATTACTTC	50	0	2.64	0.01	23	0	1.36	0.01	12	0	0.84	0.01	33	0	2.75	0.01	24	0	1.28	0.01	44	0	2.81	0.01	33	0	1.76	0.01	52	0	3.71	0.01	48	0	2.73	0.01	37	0	2.13	0.01	85	0	4.17	0.01
t01670841_x1399	3p	AGCGTAGAATGAGATTTTTGGAGT	t01670841_x1399*	5p	TCCAAAAATCTCATTCTACACTCC	102	5	5.39	0.26	130	20	7.69	1.18	128	34	8.99	2.39	158	0	13.19	0.01	136	23	7.23	1.22	186	15	11.9	0.96	97	13	5.18	0.69	124	4	8.84	0.29	94	0	5.35	0.01	78	5	4.48	0.29	133	9	6.52	0.44
t01796028_x211	5p	GATGAACGGACACAATTTGAGGAT	t01796028_x211*	3p	CTTTAAATTGTGTTCGTTCATTGT	7	0	0.37	0.01	0	0	0.01	0.01	9	0	0.63	0.01	0	0	0.01	0.01	42	0	2.23	0.01	14	0	0.9	0.01	16	0	0.85	0.01	17	0	1.21	0.01	14	0	0.8	0.01	4	0	0.23	0.01	8	0	0.39	0.01
t01818456_x151	5p	ACCCTCTTGACCGTTAGATTTGGC	t01818456_x151*	3p	TAAATCTAATAGTCAAGAGGATGT	4	0	0.21	0.01	2	0	0.12	0.01	0	0	0.01	0.01	0	0	0.01	0.01	8	0	0.43	0.01	8	0	0.51	0.01	45	0	2.4	0.01	6	0	0.43	0.01	16	0	0.91	0.01	38	0	2.18	0.01	24	0	1.18	0.01
t01842693_x170	5p	ACTCCAAAAATCTCGTTGTGCACT	t01842693_x170*	3p	TGCACACAGAGATTTTTGGAGTGC	26	0	1.37	0.01	10	0	0.59	0.01	17	0	1.19	0.01	0	0	0.01	0.01	29	0	1.54	0.01	15	0	0.96	0.01	20	0	1.07	0.01	17	0	1.21	0.01	17	0	0.97	0.01	6	0	0.34	0.01	13	0	0.64	0.01
t01874561_x357	5p	ACGTGAACCATTGAATTTTGATCC	t01874561_x357*	3p	ATCAAAATTCAATAGTCCACGTGT	33	2	1.74	0.11	14	0	0.83	0.01	15	0	1.05	0.01	30	0	2.5	0.01	37	0	1.97	0.01	16	0	1.02	0.01	14	0	0.75	0.01	15	0	1.07	0.01	0	0	0.01	0.01	81	0	4.65	0.01	57	0	2.79	0.01
t01876328_x736	3p	AGTGTAGAATGAAATTTTTAGAGT	t01876328_x736*	5p	TCTAAAAATCTCATTCTACACTCC	114	14	6.02	0.74	106	0	6.27	0.01	63	0	4.42	0.01	40	0	3.34	0.01	62	0	3.29	0.01	41	2	2.62	0.13	56	0	2.99	0.01	46	16	3.28	1.14	11	13	0.63	0.74	65	23	3.73	1.32	74	4	3.63	0.2
t01903391_x2585	5p	AAAATTTGATTCAACGGCTAAAGT	t01903391_x2585*	3p	TTTAGCTATTTGATCAAATTTCAA	220	0	11.62	0.01	154	0	9.11	0.01	159	0	11.16	0.01	252	0	21.03	0.01	309	0	16.42	0.01	306	0	19.57	0.01	94	0	5.02	0.01	248	0	17.67	0.01	97	0	5.52	0.01	189	0	10.86	0.01	221	0	10.83	0.01
t01962011_x583	3p	TTAATTAGGTGTATGGTGAGC	t01962011_x583*	5p	TTACCATATACATAATCATTT	84	0	4.44	0.01	48	0	2.84	0.01	24	0	1.68	0.01	42	0	3.51	0.01	39	0	2.07	0.01	36	0	2.3	0.01	196	0	10.46	0.01	14	0	1	0.01	23	0	1.31	0.01	18	0	1.03	0.01	59	0	2.89	0.01
t02032016_x131	5p	ATGAGATGGGGAGGGTAGACAATC	t02032016_x131*	3p	TTGTCTGCCATTCCCATTTCATAC	8	0	0.42	0.01	0	0	0.01	0.01	9	0	0.63	0.01	0	0	0.01	0.01	20	0	1.06	0.01	15	0	0.96	0.01	7	0	0.37	0.01	32	0	2.28	0.01	10	0	0.57	0.01	3	0	0.17	0.01	26	0	1.27	0.01
t02106445_x448	3p	AAGTGTAGAATGAAATTTTTGGAG	t02106445_x448*	5p	TCAAAAATTACATTCTACACTCCA	37	0	1.95	0.01	16	0	0.95	0.01	39	0	2.74	0.01	0	0	0.01	0.01	35	0	1.86	0.01	63	0	4.03	0.01	25	0	1.33	0.01	58	0	4.13	0.01	27	0	1.54	0.01	40	0	2.3	0.01	72	0	3.53	0.01
t02367433_x954	5p	AAGAGATTCGAGCTGTTGAAATTT	t02367433_x954*	3p	ATTTCAACGGTCTGAATCATTTAC	72	1	3.8	0.05	70	0	4.14	0.01	31	0	2.18	0.01	72	0	6.01	0.01	126	0	6.69	0.01	98	0	6.27	0.01	48	0	2.56	0.01	70	0	4.99	0.01	81	4	4.61	0.23	101	3	5.8	0.17	162	0	7.94	0.01
t02471057_x202	5p	ATCCTCACATCTTAATCGTTCATC	t02471057_x202*	3p	TAAATAGTTAGGATATGAGGATCC	24	0	1.27	0.01	18	0	1.06	0.01	9	0	0.63	0.01	0	0	0.01	0.01	55	0	2.92	0.01	11	0	0.7	0.01	5	0	0.27	0.01	19	0	1.35	0.01	0	0	0.01	0.01	29	0	1.67	0.01	32	0	1.57	0.01
t02485382_x1275	3p	AGTAATTTGGGGTGTGTAGATAGC	t02485382_x1275*	5p	TATCCACACATCCCATTTTACTTC	102	0	5.39	0.01	99	26	5.85	1.54	51	0	3.58	0.01	51	0	4.26	0.01	120	0	6.38	0.01	58	0	3.71	0.01	196	0	10.46	0.01	73	0	5.2	0.01	105	0	5.97	0.01	82	0	4.71	0.01	212	0	10.39	0.01
t02485382_x1275	3p	AGTAATTTGGGGTGTGTAGATAGC	t02485382_x1275*	5p	TATCCACACACCCCATTTTACTTC	102	5	5.39	0.26	99	0	5.85	0.01	51	0	3.58	0.01	51	0	4.26	0.01	120	0	6.38	0.01	58	0	3.71	0.01	196	0	10.46	0.01	73	0	5.2	0.01	105	0	5.97	0.01	82	10	4.71	0.57	212	0	10.39	0.01
t02485382_x1275	3p	AGTAATTTGGGGTGTGTAGATAGC	t02485382_x1275*	5p	TATCCACACACCTCATTTTACTTC	102	0	5.39	0.01	99	0	5.85	0.01	51	0	3.58	0.01	51	0	4.26	0.01	120	0	6.38	0.01	58	0	3.71	0.01	196	0	10.46	0.01	73	0	5.2	0.01	105	0	5.97	0.01	82	0	4.71	0.01	212	0	10.39	0.01
t02547976_x244	5p	ATCTGAGCCCTTGAAATTTGATCC	t02547976_x244*	3p	ATGAAATTCTAAGGGTCCGGATCC	30	0	1.58	0.01	14	0	0.83	0.01	11	0	0.77	0.01	0	0	0.01	0.01	33	0	1.75	0.01	36	0	2.3	0.01	25	0	1.33	0.01	21	0	1.5	0.01	20	0	1.14	0.01	42	8	2.41	0.46	12	0	0.59	0.01
t02685408_x293	5p	ACCTTTCTCGACTGCTAATTCACC	t02685408_x293*	3p	TGAGTTAGCCATCAAGAAAGATAC	20	0	1.06	0.01	27	0	1.6	0.01	0	0	0.01	0.01	46	0	3.84	0.01	46	0	2.44	0.01	16	0	1.02	0.01	14	0	0.75	0.01	30	0	2.14	0.01	46	0	2.62	0.01	28	0	1.61	0.01	20	0	0.98	0.01
t02782125_x1861	3p	TGGTATCGTTTCTGTAGGTTT	t02782125_x1861*	5p	ACCTACAGAAACACTACCACA	184	0	9.72	0.01	106	0	6.27	0.01	121	0	8.49	0.01	187	0	15.61	0.01	196	0	10.41	0.01	126	0	8.06	0.01	332	0	17.72	0.01	85	0	6.06	0.01	334	0	19	0.01	97	0	5.57	0.01	93	0	4.56	0.01
t02898270_x354	5p	AGGGATCAATGAAGCTAGACCATT	t02898270_x354*	3p	TGATCTAGATTTATTGATCCCTAG	42	0	2.22	0.01	37	0	2.19	0.01	40	0	2.81	0.01	1	0	0.08	0.01	17	0	0.9	0.01	27	0	1.73	0.01	0	0	0.01	0.01	19	0	1.35	0.01	16	0	0.91	0.01	28	0	1.61	0.01	28	0	1.37	0.01
t03040179_x446	3p	ATTTGGTGGATTAGGAGAAAGGGA	t03040179_x446*	5p	CCTTCCTCTTAATCCACCAAATCA	25	0	1.32	0.01	19	0	1.12	0.01	18	0	1.26	0.01	0	0	0.01	0.01	20	0	1.06	0.01	17	0	1.09	0.01	33	0	1.76	0.01	56	0	3.99	0.01	52	0	2.96	0.01	64	0	3.68	0.01	79	0	3.87	0.01
t03063567_x79	5p	AGCTGCCGACTCATTCATTCA	t03063567_x79*	3p	TGTGAATGATGCGGGAGATAA	5	7	0.26	0.37	6	0	0.35	0.01	10	12	0.7	0.84	0	0	0.01	0.01	14	0	0.74	0.01	5	7	0.32	0.45	18	5	0.96	0.27	2	3	0.14	0.21	19	15	1.08	0.85	0	0	0.01	0.01	0	2	0.01	0.1
t03063567_x79	5p	AGCTGCCGACTCATTCATTCA	t03063567_x79*	3p	TGTGAATGATGCGGGAGATAA	5	7	0.26	0.37	6	0	0.35	0.01	10	12	0.7	0.84	0	0	0.01	0.01	14	0	0.74	0.01	5	7	0.32	0.45	18	5	0.96	0.27	2	3	0.14	0.21	19	15	1.08	0.85	0	0	0.01	0.01	0	2	0.01	0.1
t03152981_x166	3p	ATGAGATTTTTGGAGTGCTAATAT	t03152981_x166*	5p	ATTAGCACTCAAAAAATCTCATTT	7	0	0.37	0.01	12	0	0.71	0.01	17	0	1.19	0.01	0	0	0.01	0.01	32	0	1.7	0.01	22	0	1.41	0.01	23	0	1.23	0.01	4	0	0.29	0.01	18	0	1.02	0.01	26	0	1.49	0.01	5	0	0.25	0.01
t03187209_x304	5p	AGCTGCCGACTCATTCACTC	t03187209_x304*	3p	GTGAATGATGCGGGAGATAT	12	0	0.63	0.01	112	0	6.62	0.01	29	0	2.04	0.01	0	0	0.01	0.01	39	0	2.07	0.01	12	0	0.77	0.01	21	0	1.12	0.01	44	0	3.14	0.01	13	0	0.74	0.01	6	0	0.34	0.01	16	0	0.78	0.01
t03271250_x5800	3p	TTCCTTCGTGACTAATCCATCTTC	t03271250_x5800*	5p	AGATGGATTATTGATGAAGAAAAC	749	161	39.57	8.51	852	114	50.39	6.74	713	106	50.05	7.44	80	75	6.68	6.26	313	148	16.63	7.86	464	138	29.68	8.83	849	187	45.31	9.98	256	136	18.24	9.69	724	151	41.19	8.59	320	84	18.38	4.83	327	61	16.03	2.99
t03370487_x77	5p	CATTTGGCATCTCTTTTTCGT	t03370487_x77*	3p	GAAAAAAGGATGCCAAAATGC	12	0	0.63	0.01	0	0	0.01	0.01	9	0	0.63	0.01	0	0	0.01	0.01	11	0	0.58	0.01	5	0	0.32	0.01	0	0	0.01	0.01	1	0	0.07	0.01	25	0	1.42	0.01	2	0	0.11	0.01	12	0	0.59	0.01
t03534717_x131	3p	AATGACTAAACGATCTTTGATTTG	t03534717_x131*	5p	AATTGGAGAACGTGTAATCATCCA	7	0	0.37	0.01	22	0	1.3	0.01	5	0	0.35	0.01	0	0	0.01	0.01	38	0	2.02	0.01	12	3	0.77	0.19	13	0	0.69	0.01	0	0	0.01	0.01	32	0	1.82	0.01	1	0	0.06	0.01	1	0	0.05	0.01
t03612591_x1494	3p	AGTAAAATGGGATGTGTGGATAAC	t03612591_x1494*	5p	TATCCACACACCTTATTTTACTTC	187	0	9.88	0.01	81	0	4.79	0.01	55	0	3.86	0.01	60	0	5.01	0.01	122	0	6.48	0.01	140	0	8.95	0.01	172	0	9.18	0.01	122	0	8.69	0.01	161	0	9.16	0.01	79	0	4.54	0.01	210	0	10.29	0.01
t03815957_x697	3p	ATTGATTGTGGACAAACTCGGGGA	t03815957_x697*	5p	CCTGAGATTGTCCATCATCAATCA	47	0	2.48	0.01	66	0	3.9	0.01	35	0	2.46	0.01	113	0	9.43	0.01	64	0	3.4	0.01	26	0	1.66	0.01	21	0	1.12	0.01	33	0	2.35	0.01	0	0	0.01	0.01	23	0	1.32	0.01	28	0	1.37	0.01
t04233781_x84	5p	ATTTTGTCCAAGTTGAAGGTTACT	t04233781_x84*	3p	TAACCTTCAACGTGGACAAAACAA	1	0	0.05	0.01	0	0	0.01	0.01	0	0	0.01	0.01	31	0	2.59	0.01	0	0	0.01	0.01	7	0	0.45	0.01	0	0	0.01	0.01	0	0	0.01	0.01	0	0	0.01	0.01	0	0	0.01	0.01	0	0	0.01	0.01
t04263949_x1210	3p	ATGAGATGAGGAGGGTAGACAATC	t04263949_x1210*	5p	TTGTCTGCCCTCCCCATCCCATGC	121	0	6.39	0.01	145	0	8.58	0.01	76	4	5.34	0.28	134	0	11.19	0.01	106	0	5.63	0.01	97	0	6.2	0.01	105	0	5.6	0.01	73	0	5.2	0.01	39	0	2.22	0.01	95	0	5.46	0.01	127	0	6.23	0.01
t04296158_x1721	3p	AGTGTAGAATAAGAATTTTGGAGT	t04296158_x1721*	5p	TCTAAAAATCTCATTCTACACTCC	170	14	8.98	0.74	111	0	6.56	0.01	83	0	5.83	0.01	91	0	7.6	0.01	230	0	12.22	0.01	166	2	10.62	0.13	177	0	9.45	0.01	172	16	12.26	1.14	40	13	2.28	0.74	153	23	8.79	1.32	191	4	9.36	0.2
t04441452_x81	3p	AGTATTTGAAGGTAAAGTGGATGA	t04441452_x81*	5p	ATCAACTTTGTCGTCAAATACTGG	11	0	0.58	0.01	0	0	0.01	0.01	0	0	0.01	0.01	1	28	0.08	2.34	0	0	0.01	0.01	2	0	0.13	0.01	18	0	0.96	0.01	1	0	0.07	0.01	0	0	0.01	0.01	0	0	0.01	0.01	2	0	0.1	0.01
t04687649_x448	5p	ACTCTCTTGACCGTTAGATTTGGC	t04687649_x448*	3p	CAATCAAACAGTCAAGAGAGTGT	28	0	1.48	0.01	18	0	1.06	0.01	35	0	2.46	0.01	0	0	0.01	0.01	21	0	1.12	0.01	56	0	3.58	0.01	47	0	2.51	0.01	44	0	3.14	0.01	17	0	0.97	0.01	42	0	2.41	0.01	96	0	4.71	0.01
t04716517_x1427	5p	ATGGGTCGTTGGATGAAAATTCAA	t04716517_x1427*	3p	AAATTTTCATCTAATGGTCCATAC	146	0	7.71	0.01	212	0	12.54	0.01	75	0	5.27	0.01	61	0	5.09	0.01	116	0	6.16	0.01	107	4	6.84	0.26	110	0	5.87	0.01	120	6	8.55	0.43	138	0	7.85	0.01	49	0	2.81	0.01	75	11	3.68	0.54
t04788679_x173	5p	ACTCTCTTGACTGTTGGATTTGGC	t04788679_x173*	3p	ATAATCCAACGGTCAAGAGGGTGT	8	0	0.42	0.01	12	0	0.71	0.01	4	0	0.28	0.01	0	0	0.01	0.01	11	15	0.58	0.8	16	0	1.02	0.01	16	0	0.85	0.01	16	0	1.14	0.01	0	0	0.01	0.01	16	0	0.92	0.01	23	0	1.13	0.01
t04866336_x5364	3p	ATCGTCGTCTTGGCTGTCCAC	t04866336_x5364*	5p	GGGGAGCAAAGACGACGATTA	521	0	27.52	0.01	448	0	26.5	0.01	397	0	27.87	0.01	237	0	19.78	0.01	386	0	20.51	0.01	382	0	24.43	0.01	776	0	41.41	0.01	245	0	17.46	0.01	738	0	41.98	0.01	387	3	22.23	0.17	479	0	23.48	0.01
t04875777_x605	5p	AGCGAGAATTGAACCTAAGACCTC	t04875777_x605*	3p	TATCTTAGGTTCGATTCTCGCTAA	50	0	2.64	0.01	19	0	1.12	0.01	32	0	2.25	0.01	44	0	3.67	0.01	37	0	1.97	0.01	58	0	3.71	0.01	25	0	1.33	0.01	35	0	2.49	0.01	0	0	0.01	0.01	31	0	1.78	0.01	53	0	2.6	0.01
t04954913_x13904	3p	CGGATCCCGCCTTGCATCAAC	t04954913_x13904*	5p	TGGTGCAGGTCGGGAACCGCT	1660	337	87.69	17.8	1108	270	65.53	15.97	860	122	60.37	8.56	1331	33	111.1	2.75	1113	142	59.13	7.54	1026	281	65.63	17.97	1410	268	75.25	14.3	645	134	45.96	9.55	1277	299	72.65	17.01	642	240	36.88	13.79	972	406	47.65	19.9
t05068025_x1057	3p	ATGTGACTGTCCACATCAAATGCC	t05068025_x1057*	5p	CATCTGATGTAGACAACCACATCA	117	0	6.18	0.01	57	0	3.37	0.01	66	0	4.63	0.01	0	0	0.01	0.01	148	0	7.86	0.01	117	0	7.48	0.01	70	0	3.74	0.01	62	0	4.42	0.01	114	0	6.49	0.01	110	0	6.32	0.01	113	0	5.54	0.01
t05186586_x137	5p	ATACGATGTGGTGGTTGATGG	t05186586_x137*	3p	ATCAACCTCCACATCATATGG	9	0	0.48	0.01	0	0	0.01	0.01	5	0	0.35	0.01	0	0	0.01	0.01	5	0	0.27	0.01	2	0	0.13	0.01	33	0	1.76	0.01	7	0	0.5	0.01	0	0	0.01	0.01	20	0	1.15	0.01	14	0	0.69	0.01
t05218660_x3185	5p	ATCCGTACCGTTGAAATTTGATCC	t05218660_x3185*	3p	ATCAAATTTGAACGGTCGGGATAG	368	0	19.44	0.01	213	0	12.6	0.01	247	0	17.34	0.01	24	0	2	0.01	401	0	21.3	0.01	275	0	17.59	0.01	183	0	9.77	0.01	268	0	19.1	0.01	115	0	6.54	0.01	461	0	26.48	0.01	441	2	21.62	0.1
t05229383_x4081	3p	CTTGCATATCTCAGGAGCTGC	t05229383_x4081*	5p	AGCTGCTGAGCTATGGATCCC	417	320	22.03	16.9	341	478	20.17	28.27	136	269	9.55	18.88	140	251	11.69	20.95	207	360	11	19.13	160	309	10.23	19.76	1002	569	53.48	30.37	144	233	10.26	16.6	1009	357	57.4	20.31	178	263	10.23	15.11	196	356	9.61	17.45
t05283376_x89	3p	AACCAACAGAGAGGGGGTGATGTG	t05283376_x89*	5p	GATCTCCCCCTTTCCGTTGGTCGA	4	0	0.21	0.01	6	0	0.35	0.01	0	0	0.01	0.01	0	0	0.01	0.01	0	0	0.01	0.01	0	0	0.01	0.01	11	0	0.59	0.01	12	0	0.86	0.01	0	0	0.01	0.01	0	0	0.01	0.01	56	0	2.75	0.01
t05317198_x857	3p	AGTAATTTGGGGTGTGTGGATATC	t05317198_x857*	5p	TATCCACACACCCCATTTTACTTC	58	5	3.06	0.26	52	0	3.08	0.01	45	0	3.16	0.01	39	0	3.26	0.01	145	0	7.7	0.01	55	0	3.52	0.01	122	0	6.51	0.01	64	0	4.56	0.01	107	0	6.09	0.01	58	10	3.33	0.57	77	0	3.77	0.01
t05533652_x933	3p	TTGGATAAAAAATGAACGGTC	t05533652_x933*	5p	CCGTTCATTTTTTATCCAACG	61	0	3.22	0.01	69	0	4.08	0.01	55	0	3.86	0.01	0	0	0.01	0.01	62	0	3.29	0.01	55	0	3.52	0.01	138	0	7.36	0.01	45	0	3.21	0.01	102	0	5.8	0.01	112	0	6.43	0.01	123	0	6.03	0.01
t05533652_x933	3p	TTGGATAAAAAATGAACGGTC	t05533652_x933*	5p	CCGTTCATTTTTTATCCAACG	61	0	3.22	0.01	69	0	4.08	0.01	55	0	3.86	0.01	0	0	0.01	0.01	62	0	3.29	0.01	55	0	3.52	0.01	138	0	7.36	0.01	45	0	3.21	0.01	102	0	5.8	0.01	112	0	6.43	0.01	123	0	6.03	0.01
t05550832_x116	3p	AATCGTGATCGCACAAATAAGAGG	t05550832_x116*	5p	TCCTATTTGTGCGGTCACGGTTAA	11	0	0.58	0.01	0	0	0.01	0.01	0	0	0.01	0.01	0	0	0.01	0.01	12	0	0.64	0.01	3	0	0.19	0.01	11	0	0.59	0.01	3	0	0.21	0.01	19	0	1.08	0.01	21	0	1.21	0.01	12	0	0.59	0.01
t05565673_x5938	5p	ATCCGTGCCGTTGAAATTTGATCC	t05565673_x5938*	3p	ATCAACTTTCAATGGCATGGATTC	643	0	33.97	0.01	578	0	34.18	0.01	378	0	26.54	0.01	194	0	16.19	0.01	592	0	31.45	0.01	597	0	38.19	0.01	427	0	22.79	0.01	551	0	39.26	0.01	294	0	16.72	0.01	849	0	48.77	0.01	590	0	28.92	0.01
t05614578_x77	5p	AGTGATCTAGATTTTTGAAATTTG	t05614578_x77*	3p	AATTTCAAAGATCCGAATTATTTG	2	0	0.11	0.01	0	13	0.01	0.77	0	0	0.01	0.01	0	0	0.01	0.01	18	0	0.96	0.01	17	0	1.09	0.01	0	0	0.01	0.01	6	0	0.43	0.01	0	0	0.01	0.01	0	0	0.01	0.01	7	0	0.34	0.01
[truncated: 61 more rows]
[truncated: 7 more columns]
