# Supplementary material for: The Identification of Small RNAs Differentially Expressed in Apple Buds Reveals a Potential Role of the Mir159-MYB Regulatory Module during Dormancy
Source: Plants (Basel). 2021 Dec 3;10(12):2665. doi: 10.3390/plants10122665 (PMC8703471; doi:10.3390/plants10122665)
Supplement: Supplementary file 1 [file plants-10-02665-s001.zip › Sup Table 2.xlsx]

## Sheet: DESEQ2 stage1 vs stage 2
miRBASE ID	log2FC.stages2endo_to_eco	log2FC.stages3endo_to_eco	log2FC.stages4eco	pvalue	padj
t11329296_x5768	-0,467275249	3,081996719	5,549132005	3,56E-39	2,85E-37
mdm-miR5225cMIMAT0026052	-0,704455009	1,558187053	1,596560737	0,0000000476	0,0000019
ptc-miR159d	0,02162073	0,772736546	2,15887901	0,000000178	0,00000476
mdm-miR390eMIMAT0025973	-0,440458239	0,156292214	1,70485897	0,00000399	0,0000797
mdm-miR171bMIMAT0025939	-0,70333948	0,776452325	-0,780237506	0,000627785	0,010044566
ath-miR858b	-0,555910413	1,17354533	-0,522471534	0,001036007	0,010360074
mdm-miR7121eMIMAT0026044	0,441183557	1,621496007	0,013620404	0,001023549	0,010360074
mtr-miR4414a-5p	0,748466995	1,940841421	0,465069684	0,000998204	0,010360074
mdm-miR159aMIMAT0025898	0,888407048	1,992329498	1,925369362	0,001237693	0,011001713
t05229383_x4081	-0,426010789	1,147043521	-0,418968168	0,001985176	0,015881411
mdm-miR858MIMAT0026070	0,771073871	2,573439795	-0,053931916	0,003115578	0,022658749
mdm-miR164cMIMAT0025909	-0,758931965	-0,174675023	-1,766344922	0,003713195	0,02285043
t00205877_x43290	0,594218486	0,377115465	-0,789901383	0,003476874	0,02285043
mdm-miR7121cMIMAT0026042	-0,158971765	1,006913274	-0,353449029	0,004831137	0,027606496
mes-miR319h	0,066578823	1,053202337	0,150689649	0,005923202	0,031590412
peu-miR2910	0,110467129	1,370096139	0,39146835	0,006482689	0,032413446
t08515395_x8579	0,311914625	0,028147062	-1,428820956	0,007518203	0,03537978
t00969484_x10829	0,843120716	0,872475338	-0,456199526	0,008255245	0,03668998
mdm-miR482bMIMAT0026022	-0,631503057	0,325526306	-1,029474167	0,01188352	0,050035873
t10212079_x3461	1,324127043	1,583907032	0,586637729	0,020944138	0,083776552
mdm-miR482cMIMAT0026023	-0,813259551	-0,007696485	-1,067480675	0,02469151	0,094062894
sit-miR05-npr	0,56259538	-0,941254073	-0,26030766	0,026714169	0,097142433
cpa-miR319	0,744053981	1,560461224	1,28305695	0,029165045	0,101443637
hbr-miR166a	-0,249114061	-0,193153977	0,921783015	0,035854908	0,119516361
mdm-miR396dMIMAT0025992	-0,803528296	-0,847739335	-0,806479237	0,042732142	0,136742854
t01163329_x11463	1,030952042	1,120216074	0,877506499	0,045996064	0,141526352
t03271250_x5800	-1,186887543	-0,499041528	-1,301143848	0,054125817	0,158048326
t06292294_x2452	0,926552676	0,482239468	1,530566392	0,055316914	0,158048326
cme-miR166g	0,385245723	-0,760144051	0,085275189	0,110272341	0,304199562
pta-miR319	0,893052295	1,031248819	0,078428804	0,141257377	0,376686337
mdm-miR167gMIMAT0025928	-0,564320241	0,276611958	-0,49044082	0,151763464	0,379408661
mdm-miR7120a-3pMIMAT0037472	-0,194164259	0,563549353	-0,331963508	0,148884257	0,379408661
t07733140_x2002	1,225749848	0,917182119	1,230762004	0,160633063	0,389413486
mdm-miR482a-3pMIMAT0011165	-0,337169453	-0,442693347	-1,082406796	0,166447239	0,391640563
mdm-miR162aMIMAT0025905	-0,15246489	-0,946553527	-0,320494616	0,212464073	0,485632168
mdm-miR394aMIMAT0025978	-1,009791299	-0,262838356	-1,21444919	0,219472023	0,487715607
mdm-miR159dMIMAT0043539	-0,271613675	-0,233511687	-0,864753471	0,232232747	0,500948022
mdm-miR393cMIMAT0025977	-0,209472356	0,236796426	-0,475768495	0,237950311	0,500948022
mdm-miR166dMIMAT0025916	0,06881714	-0,74558824	-0,046454933	0,258969791	0,506181946
gma-miR396a-3p	0,370570231	0,065843642	0,084096436	0,26582055	0,506181946
mdm-miR319c-3pMIMAT0026058	0,46099133	0,101868955	0,462743071	0,260031201	0,506181946
t07356962_x2229	0,549940259	0,583165648	0,720350568	0,269789233	0,506181946
t01903391_x2585	1,00100447	1,012400101	1,013865714	0,272072796	0,506181946
mdm-miR396aMIMAT0025989	-0,145880828	-0,686467622	-0,788359791	0,302551051	0,529108555
gma-miR166m	0,011798317	-0,666488163	-0,706999587	0,304237419	0,529108555
t02782125_x1861	0,629868959	0,74177898	-0,120155433	0,291400904	0,529108555
aqc-miR166a	-0,093728533	-0,770076681	-0,368158027	0,33526644	0,536426304
cme-miR319c	0,283867646	-0,757869392	0,259328516	0,325645539	0,536426304
t01282844_x8805	0,361723045	0,08903649	0,260762168	0,329860198	0,536426304
mdm-miR396gMIMAT0025995	0,525811493	0,592848014	0,872789673	0,332944817	0,536426304
mdm-miR482dMIMAT0026039	-0,132109876	0,315599626	0,310567409	0,347633971	0,54530819
mdm-miR2118bMIMAT0026035	-0,924340675	-0,268807176	-0,445578479	0,359494222	0,549093367
mdm-miR1511MIMAT0026188	-0,549782682	0,112606933	-0,373562247	0,363774355	0,549093367
osa-miR166e-3p	0,132845915	-0,761506484	0,079669516	0,375397363	0,554529886
t05833725_x3129	0,932685841	0,337755123	0,668327981	0,381239297	0,554529886
cme-miR319a	0,203559613	0,385197158	-0,274912755	0,406478044	0,58068292
t05783125_x3045	0,502507155	0,411848744	0,846844909	0,418276807	0,587055168
csi-miR166d	-0,016392774	-0,669011592	-0,304750568	0,43469618	0,591259233
mes-miR166i	0,047391989	-0,648701229	0,16246489	0,436053684	0,591259233
cpa-miR166e	-0,059813845	-0,635322276	-0,116581323	0,481975027	0,64263337
aly-miR166a-5p	-0,856326827	-0,709286138	-0,226044288	0,532325427	0,686871518
ath-miR165a	0,048102848	-0,541197972	-0,080348654	0,527564177	0,686871518
t07028129_x2201	0,209191129	-0,171585146	-0,610995952	0,555721437	0,705678016
t05218660_x3185	0,073544351	-0,249088338	0,698556037	0,59247831	0,740597887
cpa-miR166d	-0,65390074	-0,907424069	-0,911754336	0,63364826	0,75927715
aly-miR159b-3p	-0,054798816	0,054460211	-0,495305868	0,635894613	0,75927715
t04296158_x1721	0,778079976	0,384885002	0,70656449	0,624069675	0,75927715
mdm-miR319aMIMAT0025967	0,366197163	-0,051383589	0,049091769	0,667382457	0,785155832
t04954913_x13904	0,284375139	-0,113331639	0,196353548	0,699805309	0,811368475
sit-miR58-1-npr	-0,49848934	-0,066114788	-0,838756936	0,770299612	0,861595541
mdm-miR535dMIMAT0026027	-0,201101379	0,139467039	-0,035155916	0,786077438	0,861595541
t04866336_x5364	-0,155310386	0,24374965	0,089629709	0,765386195	0,861595541
t07792803_x3305	-0,153435676	0,42148872	0,34235518	0,786205931	0,861595541
mdm-miR7126-5pMIMAT0026060	-0,168780237	0,229652941	0,357837484	0,800662677	0,865581272
mdm-miR403aMIMAT0026011	0,099690019	-0,193074503	-0,341549306	0,83083893	0,886228192
t05565673_x5938	0,109848916	-0,063673189	0,418410931	0,846952389	0,891528831
csi-miR166a	-0,172846642	-0,356161968	-0,534416889	0,886037913	0,915601421
t01106153_x1640	-0,145628393	0,087518036	0,021394995	0,904156403	0,915601421
t11423816_x2591	0,329035064	0,138468752	0,381362724	0,901910209	0,915601421
t09488478_x2305	0,192465468	-0,259352419	-0,021320323	0,947413716	0,947413716

## Sheet: Edger all comparisons
miRBASE ID	log2FC.stages2endo_to_eco	log2FC.stages3endo_to_eco	log2FC.stages4eco	logCPM	LR	PValue	FDR
t10036822_x303	4,07289077244755	4,21722841400806	7,37427408734616	4,40572536846136	21,4087700636654	8,65774998377417e-05	0,0068396224871816
t06991240_x100	6,35294768059592	6,27840220552099	6,6393973063607	3,01542381218009	9,09485269017897	0,0280559922391044	0,236053726216133
t07833554_x78	-1,28329284965737	-0,278808624916663	-6,52442298666309	2,75101693774893	9,17992547966271	0,0269919027552397	0,236053726216133
t03063567_x79	-0,115297163174859	0,541155730503917	-5,91538092391435	2,74327293666583	10,8073407001194	0,0128146055062251	0,157369384717473
t11329296_x5768	-0,592226548977715	3,05855417390787	5,29543520702267	8,53314418450202	129,186340388764	8,09868584568061e-28	1,91938854542631e-25
t05614578_x77	4,26901611454653	2,10564462610479	3,87615795481181	2,7877357822761	5,38371095077926	0,145761816936392	0,606062291472365
t03534717_x131	0,653643472517697	0,0750251833423129	-3,77270723753501	3,33304105468435	6,194100732961	0,102539345525753	0,523894244234733
t01818456_x151	1,69932740805566	3,36490484530562	3,67548982511797	3,5628923477184	6,09103381982127	0,107264259374287	0,523894244234733
mdm-miR319hMIMAT0043595	-0,994004770125364	0,0766401258566252	-3,01972204119386	3,03439603420375	3,52100612421884	0,31804789912073	0,860166636916025
mdm-miR477bMIMAT0026020	-0,683229144850804	-0,356297148452529	-2,89155003357824	5,07945357414449	6,4977198388862	0,0897524712915831	0,499770066272504
t03187209_x304	-1,53795067901911	-0,787244169634852	-2,76714679075625	4,5672055657378	4,10519247116799	0,250326991839683	0,793871748472289
mdm-miR7125MIMAT0026059	-7,02993551225695	-1,7268930005244	-2,7107397528625	2,6692548789843	11,3475737262003	0,00998749675035539	0,139237454696131
t05550832_x116	0,854598673710426	1,66156573627445	2,69735846955082	3,18674568606334	3,7088764134707	0,294664730399721	0,835970741889157
ppe-miR858	-0,705076709632829	2,16831636542907	2,59158891597806	5,22281982807835	10,1710689776735	0,0171665815708487	0,169639881925483
t05186586_x137	-0,755572221541556	1,46605060278374	2,47266388122715	3,39185210699488	5,42015638950585	0,143492911174408	0,606062291472365
t08517492_x488	-1,24888963236156	0,417380134923205	-2,45877680529548	5,03952539216537	7,60335761987705	0,0549613871905506	0,361829132337791
t01796028_x211	1,85031204288272	1,55352754280529	2,26493554378355	3,95108989348264	2,40521752613161	0,492664120873355	0,932941693314884
mdm-miR398cMIMAT0026000	3,5666335454714	1,91736733069922	2,25561323492485	3,3093421136773	3,24376072201563	0,355547118126212	0,871955394225359
t00403975_x734	0,776683472978781	1,34669785311369	2,19985837435497	5,75530092518922	5,88529259557665	0,117326327710598	0,523894244234733
t01565772_x621	1,06094545909404	1,24275049029834	2,18293223468225	5,43613105536549	3,51062452103807	0,319386768137596	0,860166636916025
mdm-miR3627bMIMAT0026017	0,317560176434184	-6,90966043155684	-2,11258837131023	3,1696381918754	11,5805964318929	0,00896706382738274	0,132824632943107
aqc-miR166c	-0,667818342000528	1,42573729729027	2,05275587325634	3,87303666983295	4,48377482772337	0,213742109640058	0,744891405340842
mdm-miR164cMIMAT0025909	-0,899792167030046	-0,217062553572518	-1,98178340495077	8,38650745830094	13,7568298709698	0,00325554805958036	0,0740841367111482
bna-miR167a	1,09485680990508	1,03516974303204	1,95341393798044	2,44840092100356	1,11211586158803	0,774150100915271	0,946087325375963
ptc-miR159d	-0,108167091827433	0,704324943047687	1,92455648290278	7,49703130166003	19,1615229390008	0,000253158783332839	0,0149996579124707
t11067480_x144	1,32143140060632	0,416247063103097	1,89067541722179	3,62585768458405	1,4878512748092	0,685077075018634	0,941116989359888
t04788679_x173	0,38906017193308	0,629303571852059	1,86165522214861	3,74753118629304	2,27267491197512	0,517775870521024	0,932941693314884
t08287422_x116	-0,539494862634794	-0,724388067103209	-1,85265667108391	3,16757592214765	1,21217926433821	0,750084727653522	0,945316154552146
t03040179_x446	-0,558687030584656	1,3012177669192	1,79082955772429	5,03260924783728	6,47445039065462	0,0906755816443783	0,499770066272504
t01874561_x357	0,640150683750765	-0,814289525558789	1,7493474404964	4,75467123501831	5,84560520168011	0,119368308812977	0,523894244234733
t08515395_x8579	0,196543420784377	-0,0140137718494841	-1,66711452925273	9,15084077761033	12,3857010428123	0,00617220671619118	0,0975208661158207
mdm-miR395lMIMAT0043626	-4,51419833607173	0,883649291130931	1,64411848227782	3,93612596381727	13,4358998355844	0,00378279434029064	0,0740841367111482
mdm-miR159aMIMAT0025898	0,719867917556884	1,94155857558094	1,63562492126968	12,89033437837	13,1281673764113	0,00436747686542579	0,0740841367111482
t09078889_x1129	-0,678665614819216	-1,04358898106465	-1,6290531065025	6,24036862422718	5,90341632067097	0,1164049583046	0,523894244234733
mdm-miR7122aMIMAT0026048	1,56199862478188	0,912556387242801	1,62692437841309	4,61873244604547	2,12266271401811	0,547341565629202	0,933664661545704
t07750091_x210	2,02510718547013	1,82955820885025	1,57403501939403	3,97412706576126	2,30667448978654	0,511243457995066	0,932941693314884
t10504083_x340	-0,513053619508178	0,0149316389628508	1,5712228310105	4,7318623697371	2,65985042005641	0,44709346951836	0,913305482478184
bdi-miR167c-5p	-0,678864757282429	-0,53576500149834	-1,54758941689847	6,75499717788979	5,53589853960575	0,1365071839941	0,588221865574575
t01640484_x552	0,576767653020569	0,876221307306225	1,5379792577423	5,28248590784268	3,22025119867766	0,358897308626435	0,871955394225359
mdm-miR390eMIMAT0025973	-0,508950335549652	0,0813299114854033	1,51224536349516	7,88192402179432	16,4132343099448	0,000932887822986696	0,0368490690079745
t04875777_x605	0,689534740129528	-0,444177643240791	1,50633529401455	5,39736484743771	4,04659529572305	0,256476438619869	0,793871748472289
t06353578_x159	-0,357149558036981	0,927575324878068	1,4887228554375	3,63931125706871	2,24675535700786	0,522797831117451	0,932941693314884
t00557558_x407	1,08134382448024	0,247369876825495	1,4791337548227	4,94193214448024	2,19006556355772	0,53390779529254	0,932941693314884
vvi-miR396b	0,560727132643889	-0,366995029292242	1,45942190473425	5,85965169809382	4,49946179871683	0,212338298710002	0,744891405340842
t03271250_x5800	-1,25919586105554	-0,516741603863155	-1,44715002138821	8,6073637543802	7,67087232476548	0,0533267946004193	0,361829132337791
mdm-miR7120b-5pMIMAT0026038	1,35277977194805	2,5151752106785	1,43442598350366	5,24153292396753	7,41681934245255	0,0597346819813429	0,372555779725744
mdm-miR5225cMIMAT0026052	-0,833813319959225	1,54309303159302	1,40465178975465	11,4471498691462	27,1027648539054	5,60241092135884e-06	0,000663885694181022
mdm-miR535bMIMAT0026025	-0,880726684739106	0,650181288467704	-1,38187737461129	4,68929692606985	3,05039179559774	0,383920820204642	0,871955394225359
mdm-miR172mMIMAT0025964	-0,988153010613407	0,666149090326769	-1,36882069291595	3,87299161519895	2,83519280355782	0,417739274100812	0,891929801458491
t07940529_x426	-0,245494245989686	1,15391335844423	1,34288807198026	4,86095450165376	3,12567812138995	0,372651042588134	0,871955394225359
t06292294_x2452	0,793634361908447	0,403687453853848	1,33316690282187	7,43248146372202	5,00240788380202	0,171620912101634	0,677902602801453
t00370463_x599	0,708842699240309	-1,32434674375482	1,33267713348139	5,39098485525119	8,00634334677831	0,0458807895852699	0,339804597865905
mdm-miR394aMIMAT0025978	-1,11720636466711	-0,288398885258701	-1,332107045529	9,10130905370184	4,19801874349078	0,240860321410005	0,781971180468099
t01842693_x170	-0,0904091073485895	0,0915342169388209	-1,32629150045326	3,73052974085056	1,21992210118694	0,748230241465359	0,945316154552146
mdm-miR482a-3pMIMAT0011165	-0,474035626742501	-0,479860848214441	-1,30462037273782	9,6662023612128	5,92559518239733	0,11528683074513	0,523894244234733
mdm-miR482cMIMAT0026023	-0,934898411579715	-0,0370961916688154	-1,22514533055698	13,0087154086246	9,03079717763501	0,0288842112247589	0,236053726216133
mdm-miR11011bMIMAT0043630	-1,79475540102623	0,181660668472382	-1,21578561020917	5,43860909976346	3,24184184691184	0,355819546034024	0,871955394225359
mdm-miR482bMIMAT0026022	-0,750694841816874	0,298627991972005	-1,19458497348034	13,2234374585264	10,4987070822884	0,0147696703147691	0,166686279266679
t10979650_x916	0,0900043008074503	0,0826775012015464	1,18395148105537	6,05072018195223	3,69536781874503	0,296293427505018	0,835970741889157
t10123212_x367	1,2248351806532	0,239100121192241	1,1829324169086	4,78691909984731	1,86561873775574	0,600760704629426	0,941116989359888
t05771720_x1275	0,0180680089741591	-0,556100404456883	1,16694104779631	6,49053700685716	5,98932972440861	0,112130512784196	0,523894244234733
t00682504_x188	2,23846972875159	0,913307489549332	1,1563529096157	3,85112029441777	1,92253920031959	0,588638584065213	0,941116989359888
mdm-miR171iMIMAT0025946	-0,761045087041597	1,10225949686155	-1,15453190032306	5,91697883297101	6,41110781240819	0,093234891070808	0,501082745124375
bdi-miR166f	1,46298589099872	-0,748297316439691	1,145642580022	5,10675051238019	5,8716210440602	0,118025959266132	0,523894244234733
vun-miR394a.1	-0,884013027719446	0,0307203250415504	-1,14196080356454	6,2185789842866	1,89055004625826	0,595431150634301	0,941116989359888
t04687649_x448	0,101749725585417	0,480061518393604	1,14028590262644	5,05923187501488	1,38519944761171	0,709007701042784	0,941116989359888
t10560101_x554	0,254317253311298	0,952056177350124	1,09843563430464	5,37688035477327	1,92170518659628	0,588815021293711	0,941116989359888
mdm-miR393cMIMAT0025977	-0,337766820826987	-0,265125994108527	-1,09017816065312	8,44486380530701	4,46987329959647	0,214993313480066	0,744891405340842
t07028158_x271	-0,430634048387602	-0,319438354871528	1,08540365608399	4,42732258407893	1,27689321900475	0,734627185787254	0,941116989359888
t01047916_x221	1,96338877607791	1,18871905733353	1,08268189695251	4,08467061078268	2,39316224466024	0,494908737950294	0,932941693314884
ppt-miR319a	-0,495691105149044	1,77026542003154	1,06931539105938	3,42307112833297	2,69663899975024	0,440798763349106	0,908428755771635
mdm-miR156acMIMAT0025895	0,773174722516242	1,46428356789406	1,06375681343512	3,60047992735351	1,14665175860268	0,765825745459966	0,945316154552146
t07733140_x2002	1,04216019400874	0,836574242932316	1,06099271221354	7,1184797116344	3,23988573230539	0,356097447044426	0,871955394225359
t01354282_x300	-0,4208550827835	-1,4520835855319	-1,05798247795328	4,48889458770658	1,27827450683816	0,734298360551588	0,941116989359888
t08011676_x176	1,019031262614	1,26991011232841	1,05776003196706	3,84870703492329	0,86504641819047	0,833853649725261	0,95626299905138
mdm-miR11015MIMAT0043624	-0,0146771106595529	-0,909733590771152	-1,05110033313451	4,55254057309408	1,30276213808984	0,728477283919144	0,941116989359888
cpa-miR319	0,613431597305707	1,49382788754041	1,04394087841562	7,09678195122603	6,36497735280886	0,0951422933780458	0,501082745124375
cpa-miR166d	-0,734968279715924	-1,00186238129327	-1,0416757356097	7,03033449039062	1,86757552310157	0,600341281740764	0,941116989359888
mdm-miR399iMIMAT0026009	0,281160221800598	0,265259454933653	-1,03973785705934	4,66320908179171	1,48209146431269	0,686409736192653	0,941116989359888
mdm-miR391MIMAT0026019	-0,128956057255109	0,673166865798253	1,03281535662802	5,2994753540783	1,39636973968005	0,706385904697354	0,941116989359888
t05988915_x1147	0,480916177301194	-0,205319963116352	-1,01979894268007	6,35082101003572	4,35769300624078	0,22534043404468	0,752192716459001
ppt-miR319c	-0,613160699770358	1,76412119575771	1,01693090294436	4,75482658718269	4,22981160109061	0,237694075682921	0,781971180468099
mdm-miR396dMIMAT0025992	-0,921595895014064	-0,886434645628227	-1,00469488296761	10,9948465695138	6,73300438514663	0,0809126878308944	0,467714805266389
t00205877_x43290	0,454070192268296	0,31080723299551	-0,997539580537842	11,5451807897364	10,7298429906218	0,0132801168537952	0,157369384717473
t01579770_x124	-2,91923536092383	-1,67117040694863	-0,997421227906499	3,34392650837856	3,14399801235843	0,369951939547512	0,871955394225359
mdm-miR396aMIMAT0025989	-0,251580548102847	-0,706102226476525	-0,962874853815009	8,42091786755313	4,00007901368796	0,261455598024752	0,793871748472289
t08559171_x429	2,08641756514227	1,12401448362185	0,960209475089399	4,96660560543229	3,02969671054729	0,387069151782913	0,871955394225359
mdm-miR535dMIMAT0026027	-0,295888290535513	0,366903235412628	-0,943617611251098	7,01976154533753	1,68284311819254	0,640754875587301	0,941116989359888
mdm-miR171bMIMAT0025939	-0,833127977302774	0,740075388483355	-0,942855669558875	11,2965719712303	14,7726851312798	0,0020215787006396	0,0584395209618095
t05533652_x933	-0,506078767155315	0,473989583611371	0,938754340353428	5,99967013180578	2,79449104190358	0,42440759274284	0,898076781071903
t05823672_x511	0,0695750536259105	0,529252408105048	0,92137929469543	5,21596008370372	1,06135591689218	0,786410139658501	0,946087325375963
osa-miR159f	0,955030953751516	0,307311693912298	-0,909711258372821	5,13347749776562	4,04934420951026	0,256184907872061	0,793871748472289
lus-miR159b	-0,161132303891958	0,0658772491729878	-0,908058485352675	5,46548781306843	1,35859400005093	0,715268569631172	0,941116989359888
mdm-miR396bMIMAT0025990	0,297867942805394	-0,99659482419444	0,903818220740479	5,75152566060079	3,97089708321686	0,26462391615743	0,793871748472289
t02782125_x1861	0,493685399202589	0,712385430742373	-0,899770987219571	6,95875326637883	3,2235898649447	0,358419879019597	0,871955394225359
t06850069_x720	-0,158344845906465	-0,119201786488351	0,892460861959738	5,67537747817704	1,79512572134668	0,615996207526594	0,941116989359888
t02367433_x954	0,992301086076697	0,319898786778876	0,887829167881843	6,10958888171387	2,07628672073596	0,556724997947263	0,935771805060293
bdi-miR393a	-0,673455600788963	1,73884353176341	-0,884524197406352	5,5702089970055	8,69134873575047	0,0336889123316787	0,266142407420262
mdm-miR167jMIMAT0025931	-1,29349417859272	-6,34034241456036	-0,866261011271895	2,45694208383753	7,49775029225582	0,0576162847698809	0,369055661904373
gma-miR156k	-0,769901581261168	0,0630799829367926	-0,855772846961088	6,39475817797745	2,75224548485754	0,431421609719264	0,904840013305004
t07356962_x2229	0,448429816475461	-0,0204351399441568	0,841649871122947	7,320061228914	2,55193824808162	0,465977757810836	0,92803973614427
t01962011_x583	-0,130327565432261	0,454788592735077	-0,827712221945127	5,2672602964682	1,317528294085	0,724975077637112	0,941116989359888
ahy-miR167-5p	-0,742678706459303	-0,062354718999124	-0,82361101682201	4,02831809927911	0,797207674443392	0,850134803669965	0,962292264806358
gba-miR403a	-1,58537112921361	-1,06529364630828	-0,823255487051571	4,24391930581507	1,43402263144092	0,697579372523788	0,941116989359888
t07028129_x2201	0,045402226352089	-0,239872797746701	-0,821848298141465	7,23247786013915	2,31843485589988	0,508998480389297	0,932941693314884
t03815957_x697	0,601820652388633	-1,16515668136293	0,821060857649317	5,59308789525228	3,61508470463947	0,306139887746932	0,85359003995321
t06556507_x395	1,0799471853846	1,01623999188378	0,814930499819889	4,90416091595071	0,996729534490672	0,802043313103493	0,954020232963666
t02032016_x131	1,1523967583239	1,79844065110188	0,786843023617969	3,5081274236924	1,39840195496949	0,705909364597393	0,941116989359888
t02485382_x1275	0,0485182258016373	0,522581387706635	0,782450538993965	6,42651329673276	1,90759164323227	0,591806113074081	0,941116989359888
aqc-miR159	-0,79566460859291	-0,076988041794048	-0,773143014874997	4,10349915099615	0,848015625448199	0,837951155643612	0,95626299905138
mdm-miR11011aMIMAT0043613	-1,09729861356784	0,097335641724718	0,769189319093267	3,6324553700336	1,58077477104752	0,663756825051698	0,941116989359888
aly-miR159b-3p	-0,190856614261423	0,0272439726154558	-0,723261536019587	8,39749137699199	2,41974871499167	0,489968993465906	0,932941693314884
mdm-miR7121eMIMAT0026044	0,297409594746111	1,59082696327242	-0,715618580973507	9,32923886768983	15,5955686952322	0,00137235381979121	0,0464639793272168
csi-miR162*	-2,23588270963796	-0,922392319429843	-0,71437893077136	3,15320212706276	1,66287048814198	0,645219834531682	0,941116989359888
t01282844_x8805	0,253516919818924	0,02743031755115	0,709648480594085	9,26865499116858	2,10175813589556	0,551557162368786	0,933707482010016
mdm-miR159dMIMAT0043539	-0,405924094388184	0,196142139625932	-0,704195793753839	16,1277934505653	5,01386546438926	0,170784657838942	0,677902602801453
t01163329_x11463	0,888987757064513	1,05421143203615	0,703342545865331	9,62206457842778	4,59245940079649	0,204189907600128	0,744891405340842
mdm-miR7124aMIMAT0026054	-0,880556707586914	0,638369562013591	0,700485084394024	4,68407239939905	2,25966283580279	0,52029244866309	0,932941693314884
t02106445_x448	0,269799970120254	0,450229722144972	0,698567313747591	5,09038053841337	0,418205489912367	0,936456514890819	0,980218333306032
t09667785_x135	-1,66844984680026	0,341766784394955	0,691605672623072	3,47629806108292	2,32934450533943	0,506922599847562	0,932941693314884
mdm-miR156tMIMAT0025886	-2,13395928374479	-0,0310091581269817	-0,69077941833377	3,99730285152714	3,25868504816187	0,353434434911087	0,871955394225359
t07284661_x745	0,427478184885976	0,214156053959025	0,690542607813305	5,73953209882038	0,849628556947106	0,83756334929128	0,95626299905138
t05783125_x3045	0,364416248321865	0,325341678698056	0,681133836100951	7,72154252133286	1,4228140155012	0,700195820817984	0,941116989359888
hbr-miR166a	-0,364287171003284	-0,210161371631244	0,672891912293144	8,06431696972704	4,62911605972468	0,201058541607614	0,744891405340842
mdm-miR167gMIMAT0025928	-0,710132247076694	0,219673408787313	-0,659711134718032	8,71540464434194	4,80887682312716	0,186339131999696	0,723973348916851
t01106153_x1640	-0,305569558413353	0,069234630871141	-0,651374149873591	6,78984836905936	0,636012838085627	0,888140798381183	0,973499608702851
bdi-miR159a-3p	-3,02674067124172	1,32069540982958	0,643163897093873	4,46782719605875	10,1812693899808	0,0170864888101186	0,169639881925483
t00969484_x10829	0,712678851052768	0,799387801018493	-0,62127881013781	9,57120306227124	9,22386267676345	0,026457926616606	0,236053726216133
t05229383_x4081	-0,568579017002919	1,1142777892918	-0,615906425035692	7,98355750011136	13,1238537259894	0,00437627811795812	0,0740841367111482
t10640946_x109	-0,619796882578644	0,43669391250824	0,611502271055348	3,16785952959432	0,713387170108975	0,870050725576169	0,966058868755769
aly-miR319c-3p	-0,138592106885084	1,21448352665373	0,601902543840588	5,29583293771273	2,9867819969751	0,393667625240985	0,871955394225359
aqc-miR166a	-0,198245664785032	-0,846789912991075	-0,594478818757071	7,65862031278931	2,83616175798543	0,417581592027325	0,891929801458491
t11029067_x213	0,361823084713647	-1,06262807246924	-0,593958365430275	4,04528349361595	0,857627691406332	0,835639267000079	0,95626299905138
t10644006_x200	1,33807030510651	0,767585969547938	0,591589373141277	3,95466086184522	0,769597014005033	0,856724337021695	0,962292264806358
mdm-miR403aMIMAT0026011	-0,0264530033158888	-0,260946861646826	-0,590118764143506	8,06447890270605	1,41426897672304	0,702193438872069	0,941116989359888
mdm-miR2118bMIMAT0026035	-1,03932642038035	-0,331898934057597	-0,590018162850779	8,38435132327766	3,35147442383845	0,340542379706594	0,871955394225359
mdm-miR7121cMIMAT0026042	-0,305503927099786	0,944941343179645	-0,585392938686471	9,01153936124355	10,9957912945201	0,0117486554235605	0,154690629743547
t00614980_x824	0,231676616072157	0,445758941890484	-0,580380203724009	5,73047405473613	1,53261849044398	0,674762718374109	0,941116989359888
mdm-miR7126-3pMIMAT0037475	0,231512085207924	-0,779870908729858	0,575963271677754	7,09308992929768	3,98983128345417	0,2625642632443	0,793871748472289
t11405782_x495	0,791163810785829	0,755106185771552	-0,570291721162092	5,20306982888552	2,16288705076559	0,539295409215777	0,932941693314884
t11389257_x121	-1,50483842409415	-1,13681235303815	0,561327723980809	3,42089478713971	1,78382590882314	0,618460908497793	0,941116989359888
mdm-miR162aMIMAT0025905	-0,281935144939771	-1,01626570980719	-0,558391253760656	7,83044215888362	3,81098237478794	0,282611278095353	0,826899665538255
csi-miR166d	-0,132021818772218	-0,715457195539729	-0,554238343412885	7,69080513518141	2,35366229998953	0,502318650383806	0,932941693314884
t05218660_x3185	-0,0602181684832448	-0,338903257323733	0,545444503482185	7,84056381667524	1,40719787310872	0,70384838044583	0,941116989359888
t00123765_x612	0,570536566704919	0,310506666870757	0,54492963099541	5,46725122269812	0,501913716508861	0,918470775772456	0,980218333306032
bdi-miR159b-3p.1	-0,92158327363462	-0,243625416926506	-0,542630086397058	4,42863330517533	0,842603897879187	0,83925191477927	0,95626299905138
sit-miR05-npr	0,438700748591089	-0,985283402255386	-0,53527191812782	8,83360137459296	7,91839627317754	0,0477286605645823	0,342778562236546
t05833725_x3129	0,789253312250085	0,307196456101175	0,53498354459495	7,77715066529514	1,8147278490409	0,611735247285845	0,941116989359888
t01670841_x1399	0,54739263424996	-0,14012597845017	-0,528975591368978	6,68003868968943	2,57819874792437	0,461324413335453	0,926558355597478
mdm-miR1511MIMAT0026188	-0,66689449783129	0,0655509001263036	-0,52755957274929	14,3591465860167	3,43871431560899	0,328798086266231	0,871955394225359
t04296158_x1721	0,638439433258309	0,309246660194032	0,518558824050504	6,94406994991438	0,99349721632566	0,802825434615473	0,954020232963666
ath-miR165a	-0,0684442692234866	-0,748806056115248	-0,511998128582066	7,52211650840051	2,16776445707481	0,538325645134861	0,932941693314884
t03370487_x77	-0,220269169189392	0,066849451608313	-0,504255489678506	2,71310213013292	0,133835717536106	0,987488585033311	0,987488585033311
t10632002_x109	1,52726146723304	-0,0151482617067125	0,504186763140188	3,24485984671032	1,48103821197994	0,686653565051301	0,941116989359888
t02471057_x202	0,54437292518861	-0,581469267254686	0,502635200197968	4,01674223129882	0,644561574426891	0,886159447958129	0,973499608702851
sit-miR60-npr	0,107172441421159	0,370069473813692	-0,50030469084031	4,82776904185952	0,776000234209135	0,855198423297805	0,962292264806358
t08065896_x105	0,444032395511102	1,16348755427339	-0,498622964692642	3,02817617953374	0,984177883578978	0,805080365370183	0,954020232963666
t01903391_x2585	0,889223144762705	-0,00727576772781367	0,498177489364406	7,54172125242397	3,02470099176566	0,387832426139057	0,871955394225359
mdm-miR7120a-3pMIMAT0037472	-0,328323367066469	0,523637717051275	-0,497790276466936	11,0533297586559	5,01065604036444	0,171018517559306	0,677902602801453
cme-miR319a	0,0755945011217047	0,355604484165462	-0,495402960395582	12,1643079624961	3,13639248331142	0,371070432251552	0,871955394225359
t05068025_x1057	0,357409556016584	0,052044180867798	0,478501095840377	6,21293007797574	0,353830162091729	0,94960591726718	0,980218333306032
t07666879_x274	0,658646430514167	0,778280547707983	-0,472517678938292	4,32175410858956	1,10794202856742	0,775157200549532	0,946087325375963
mdm-miR827MIMAT0026028	-1,48685066764944	-0,733715346792844	0,462308980085476	4,27930389581774	3,08025374825243	0,379416378567267	0,871955394225359
mdm-miR10984b-3pMIMAT0043610	-0,646242709480282	-1,07404116990789	-0,459534367094799	5,01586968185912	1,45095325447144	0,693635655906433	0,941116989359888
mdm-miR159cMIMAT0026053	-0,840680617979361	-0,43393099828576	0,458822010083229	6,75298311731992	4,39014640553767	0,222300785282782	0,752192716459001
mdm-miR10982cMIMAT0043537	0,502893104285222	-0,677671586874105	-0,448331757015473	4,56790375224599	1,63440944699189	0,651613118746751	0,941116989359888
psi-miR159	0,532784331821924	1,21776505716951	0,44379220307828	4,89543192867302	1,19521407489031	0,754152401641072	0,945316154552146
t01876328_x736	-0,790287860003597	-1,17007184454385	-0,425656775674075	5,71162267068134	2,23186649171863	0,52569897042988	0,932941693314884
t03612591_x1494	0,300952480974945	0,60170583222666	0,421890408439554	6,67114685910141	0,88497195134735	0,829052825149203	0,95626299905138
mdm-miR5225aMIMAT0026056	1,59737178240902	-2,41608930257206	-0,417114268366323	3,03494939484025	5,85543330346755	0,118859501811344	0,523894244234733
mdm-miR171jMIMAT0025947	-0,84387174124913	-1,10603013562935	-0,415304585853438	4,97348422799144	1,59767295507307	0,659917576602641	0,941116989359888
mdm-miR160dMIMAT0025903	1,81041817190916	-0,0787468858334446	0,413678566644488	3,38984096648087	2,38901649095841	0,495682474312405	0,932941693314884
t10212079_x3461	1,16315274437847	1,51139093295157	0,412370355607761	7,86850658921596	7,62505514292225	0,0544308324833621	0,361829132337791
t10206945_x214	0,432923568116037	0,471645596842759	-0,40375657060274	3,97198301027998	0,526680045335008	0,912992019407085	0,980218333306032
t04716517_x1427	-0,409477348105118	-0,166693884393233	-0,397908284516007	6,61056263705425	0,513612097935651	0,915890876238732	0,980218333306032
mdm-miR408cMIMAT0026032	-0,231654778499346	-1,72581950066718	0,393682304832019	3,37290210381466	1,63652167514043	0,651137416998892	0,941116989359888
gma-miR166m	-0,102908517951416	-0,728995358573987	-0,392431546984756	11,1204637756003	2,83855706082583	0,417192006416376	0,891929801458491
cpa-miR166e	-0,178637451860729	-0,670708232227605	-0,377322723081382	8,4985699601224	1,83880614170569	0,606526912584892	0,941116989359888
lus-miR167a	-4,99502336174503	-0,0608078004142624	-0,36231324470539	3,40009253573419	8,510345816234	0,0365618601921871	0,279521318243495
sit-miR21-1-npr	-1,1379823525862	-1,43020972793975	-0,361319315576105	4,42388973664456	1,69684749643006	0,637634896715232	0,941116989359888
t02685408_x293	1,45132982341401	1,09431059020137	0,353554418821171	4,47347946185453	1,54635992639948	0,671612547887781	0,941116989359888
t02547976_x244	0,605253161385341	0,392776406609406	0,348435735556594	4,25031615744882	0,199096043726215	0,977735095159869	0,981878040478343
aly-miR166a-5p	-0,939229802657534	-0,612439715302757	-0,335106278373993	6,77581319960206	2,12141585884596	0,547592354239885	0,933664661545704
mdm-miR166dMIMAT0025916	-0,0435968629565327	-0,786853034793341	-0,327017513361121	19,720769532632	3,54187781187875	0,31537118810356	0,860166636916025
mdm-miR482a-5pMIMAT0011164	1,08396813615875	1,34926704800027	-0,321021408797206	5,06667480888083	3,20937752318721	0,360456058622335	0,871955394225359
pab-miR396b	-0,678884075397042	-0,124623181791266	-0,319076398783237	3,68718911966894	0,257512905534316	0,967810506302158	0,980218333306032
t10652667_x948	-0,246009093794986	-0,144717462373685	0,297216711434947	6,15442751955098	0,26681927320276	0,96614309942347	0,980218333306032
t02898270_x354	-1,21636658376093	-1,55891352413864	0,290042201948172	4,68042850386548	3,20691115176599	0,360810427694232	0,871955394225359
ath-miR167m	-0,329253817462638	-0,932150568391085	0,28902279699785	4,15831261234784	0,907169040854393	0,823697418789955	0,95626299905138
mtr-miR4414a-5p	0,591509937100251	1,88498116219287	0,288514026664471	9,84430897895309	14,5741462077248	0,00221922231500542	0,0584395209618095
t06573334_x1024	0,535891810057399	0,15069837797916	0,284658874472961	6,27000873226154	0,275890557634636	0,964497150712496	0,980218333306032
sit-miR58-1-npr	-0,624709658908809	-0,129891479539718	-0,283312026358995	7,16837144986561	1,16640175905112	0,761073314489771	0,945316154552146
pta-miR159c	1,96384242487583	2,11636501844209	0,267270314238241	2,92080217205565	2,63796676262994	0,450872326793027	0,913305482478184
t05565673_x5938	-0,00187447145093647	-0,151521577984827	0,264590410561603	8,74265282025195	0,480242212446328	0,923210169371588	0,980218333306032
mdm-miR858MIMAT0026070	0,593031357088836	2,50661491777999	-0,262780124617379	9,73267452088347	18,3041592694021	0,000380670141375268	0,0180437647011877
mdm-miR11014MIMAT0043623	0,0885811937454684	-0,588542980950664	-0,258659946760581	4,52369957682943	0,372525869897549	0,9458576587876	0,980218333306032
mdm-miR168bMIMAT0025933	-0,0671452207059071	-0,611007969882392	-0,255327326696114	5,6422026920147	0,513672948780338	0,91587741853059	0,980218333306032
t06508800_x1328	0,498156996228525	-0,0518225812022231	-0,237855164474395	6,56713114292264	1,3622066979992	0,714417102586611	0,941116989359888
mdm-miR171eMIMAT0025942	-1,13872688988918	1,24796439820528	0,222436172338683	6,55298950103927	10,1695268613275	0,017178722220302	0,169639881925483
mdm-miR319aMIMAT0025967	0,242335415900768	-0,103157998747078	-0,218754574523627	12,9240555350669	1,15286178181066	0,7643307512681	0,945316154552146
t07990011_x1485	0,659390588408341	-0,146965183053416	0,218367241673228	6,66575428345842	1,91907908145627	0,58937080942917	0,941116989359888
t05317198_x857	0,757272808769629	0,852531737054996	0,215736225537951	5,90312319975805	1,7214320453748	0,632179520404278	0,941116989359888
csi-miR166a	-0,248515933522054	-0,406496112001846	-0,215042506378914	6,91259219472578	0,442537323812598	0,931321657128224	0,980218333306032
mdm-miR7126-5pMIMAT0026060	-0,284299793403126	0,186919359408658	0,21280159489761	7,03871304817857	0,729480247404588	0,86624895669642	0,966058868755769
osa-miR166e-3p	0,0227531869257663	-0,799360245388869	-0,203107188653067	7,34077284852738	2,24911312108867	0,522339510394724	0,932941693314884
t11423816_x2591	0,200782551956014	-0,0127037521420876	0,186781281593423	7,52905704064128	0,208362429282416	0,976228158201587	0,981878040478343
cme-miR166g	0,270289575357722	-0,808042847600656	-0,18393038337564	10,397566516738	4,67422291951848	0,197266573198612	0,744891405340842
gma-miR396a-3p	0,239414461741378	0,979636715049451	0,178036562924803	8,51335160605094	3,85529862235768	0,277519163420467	0,822150521633133
aly-miR396a-3p	-0,359782275186504	0,347261085554191	0,170598302971309	6,52476922030572	1,08243192218794	0,781316690537894	0,946087325375963
t06472806_x220	-1,42919868772954	-0,650928647812886	-0,170077484170957	4,12798762007018	0,703814734286876	0,872306320311116	0,966058868755769
peu-miR2910	-0,0120759644204918	1,32540335517626	0,165757591733649	9,15356763304103	9,77979717528818	0,0205337382065704	0,194659838198288
t09488478_x2305	0,0537769336836517	-0,330582751672998	-0,163247090640168	7,36461019383931	0,281407542492186	0,963486432376027	0,980218333306032
ath-miR858b	-0,704619160904597	1,12478024674719	-0,163181061883518	10,1014135147139	13,6357880134246	0,00344525707334241	0,0740841367111482
mdm-miR11005MIMAT0043604	0,0982655201554699	1,19621505030448	0,157516336749128	5,74884709860053	2,84481125866466	0,416176212190706	0,891929801458491
t10939657_x114	1,71351730674729	1,09042615697597	0,14939588061446	3,29534577524317	1,363545484425	0,714101671304337	0,941116989359888
mdm-miR10994-3pMIMAT0043573	-0,684252100558852	0,960351863915323	0,149215885752661	2,84100618984357	1,06480963854652	0,78557523794333	0,946087325375963
t07792803_x3305	-0,271329099618289	0,0818580258843448	0,141128847120789	7,84708777772306	0,62213133301029	0,891347742989531	0,973499608702851
pta-miR319	0,764431373259826	0,958587460371581	-0,13937703550941	7,04095087798561	4,44919361446068	0,216867118010625	0,744891405340842
bna-miR167d	-0,370015553422289	-1,35188786235427	-0,134866837413248	4,89209501664249	1,24675729838231	0,741813186895419	0,945213576850615
mes-miR166i	-0,0751411424388947	-0,722042086816099	-0,133526656244725	7,73107936896472	1,85799461640252	0,602396695513605	0,941116989359888
mdm-miR319c-3pMIMAT0026058	0,323132663097874	0,519761704595918	-0,119167976385021	10,0146109485847	2,43825380269811	0,486553415737927	0,932941693314884
t01416056_x386	-0,833060183940169	-1,46391435562148	0,112978104218969	4,89455156162116	2,18800597724284	0,534314681915707	0,932941693314884
mdm-miR482dMIMAT0026039	-0,26222835518719	0,262801658387552	0,0943513580575385	11,826274966369	1,5315685559758	0,675003722796794	0,941116989359888
t04866336_x5364	-0,263927986879125	0,214379367169936	-0,088475498630005	8,4827288014316	0,939424547910457	0,81590482136377	0,95626299905138
mdm-miR319dMIMAT0043552	-0,0694212175506613	1,01298146627719	-0,0883146017252207	6,24361876025163	3,77623104731273	0,286662990304496	0,828525959782508
mdm-miR396gMIMAT0025995	0,408380721846788	-0,813052248538297	-0,0875517869961841	7,5626493036961	2,99028583907944	0,393125334980184	0,871955394225359
t08618829_x1482	-0,00700643096495458	-0,354640172261407	-0,0809914749745463	6,72003065764111	0,402335490388598	0,939759615712054	0,980218333306032
t06370387_x812	-0,476975892316806	-1,03006012776272	0,0804575108144629	5,87466599044076	1,48648849330476	0,685392271778043	0,941116989359888
mes-miR319h	-0,0353772688856014	0,998101041221407	-0,0669675511540683	8,62479169880855	7,303987277051	0,0628146273906947	0,381719658758837
t11305484_x494	-1,48469854059758	-0,877403416061983	0,0659929106589744	5,18840797628457	2,72602930683031	0,435821994444133	0,906050988449644
t04954913_x13904	0,158464107338456	-0,164244162856065	-0,0578609583240952	9,85260458824377	0,506528182769608	0,917454875373062	0,980218333306032
t04263949_x1210	0,16536623828256	-0,586401784369898	-0,056535648537739	6,42428879859938	1,28708451033698	0,732202248480576	0,941116989359888
t07508544_x212	-0,150937323559654	0,649759349219051	0,0546464360417671	3,97394576869469	0,406460096384222	0,938904780734948	0,980218333306032
cme-miR319c	0,160281261146395	0,525959839000048	0,0399083426730716	12,2230062900479	1,83939044340869	0,606400876597568	0,941116989359888
t03152981_x166	0,618754717724244	-0,000512916415310743	-0,0387379625896924	3,73380298271207	0,30894503794932	0,958337474825779	0,980218333306032
mdm-miR156eMIMAT0025871	-1,56266581444006	0,813536913111713	0,0224543461627061	5,03518347993202	4,45494836295832	0,216344165084285	0,744891405340842
ptc-miR396e-3p	-1,36477245138102	1,35248644807258	-0,0150014791886769	6,41667248722084	7,05567099162808	0,0701443584734377	0,415605323955118
