# Supplementary material for: The Identification of Small RNAs Differentially Expressed in Apple Buds Reveals a Potential Role of the Mir159-MYB Regulatory Module during Dormancy
Source: Plants (Basel). 2021 Dec 3;10(12):2665. doi: 10.3390/plants10122665 (PMC8703471; doi:10.3390/plants10122665)
Supplement: Supplementary file 1 [file plants-10-02665-s001.zip › Sup Table 3.xlsx]

## Sheet: psRNAtarget E-value<3
miRNA_Acc.	Target_Acc.	Expectation	miRNA_start	miRNA_end	Target_start	Target_end	miRNA_aligned_fragment	alignment	Target_aligned_fragment	Inhibition
mdm-miR171eMIMAT0025942	MD07G1115800	0	1	21	1218	1238	UGAUUGAGCCGCGCCAAUAUC	:::::::::::::::::::::	GAUAUUGGCGCGGCUCAAUCA	Cleavage
mdm-miR171eMIMAT0025942	MD02G1210200	0	1	21	1233	1253	UGAUUGAGCCGCGCCAAUAUC	:::::::::::::::::::::	GAUAUUGGCGCGGCUCAAUCA	Cleavage
mdm-miR171eMIMAT0025942	MD04G1088100	0	1	21	1391	1411	UGAUUGAGCCGCGCCAAUAUC	:::::::::::::::::::::	GAUAUUGGCGCGGCUCAAUCA	Cleavage
mdm-miR171eMIMAT0025942	MD00G1043300	0	1	21	1925	1945	UGAUUGAGCCGCGCCAAUAUC	:::::::::::::::::::::	GAUAUUGGCGCGGCUCAAUCA	Cleavage
mdm-miR7121cMIMAT0026042	MD02G1023700	0	1	21	124	144	UCCUCUUGGUGAUCGCCCUGU	:::::::::::::::::::::	ACAGGGCGAUCACCAAGAGGA	Cleavage
mdm-miR7121eMIMAT0026044	MD02G1023700	0	1	21	124	144	UCCUCUUGGUGAUCGCCCUGC	::::::::::::::::::::	ACAGGGCGAUCACCAAGAGGA	Cleavage
hbr-miR166a	MD17G1185400	0,5	1	19	1000	1018	UCGGACCAGGCUUCAUUCC	::::::::::::::::::.	GGAAUGAAGCCUGGUCCGG	Cleavage
hbr-miR166a	MD09G1205400	0,5	1	19	1341	1359	UCGGACCAGGCUUCAUUCC	::::::::::::::::::.	GGAAUGAAGCCUGGUCCGG	Cleavage
mdm-miR164cMIMAT0025909	MD14G1203000	0,5	1	21	1015	1035	UGGAGAAGCAGGGCACGUGCA	.::::::::::::::::::	AUUACGUGCCCUGCUUCUCCA	Cleavage
mdm-miR164cMIMAT0025909	MD06G1196100	0,5	1	21	1043	1063	UGGAGAAGCAGGGCACGUGCA	.::::::::::::::::::	AUUACGUGCCCUGCUUCUCCA	Cleavage
t00205877_x43290	MD17G1245800	0,5	1	24	2587	2610	ACGGUGAUAAAUAGGGUAGUGAGC	:::.:::::.::::::::::::::	GCUUACUACUCUAUUUAUCACCGU	Cleavage
t00370463_x599	MD05G1274700	0,5	1	24	2439	2462	AUCCCGUGAUCGUGACCGUUCAUC	::::::::::::.:::::::::::	GAUGAACGGUCAUGAUCACGGGAU	Cleavage
bdi-miR393a	MD09G1005000	1	1	21	2160	2180	UCCAAAGGGAUCGCAUUGAUC	: ::::::::::::::::::	AAGCAAUGCGAUCCCUUUGGA	Cleavage
bdi-miR393a	MD17G1009000	1	1	21	2353	2373	UCCAAAGGGAUCGCAUUGAUC	: ::::::::::::::::::	AAACAAUGCGAUCCCUUUGGA	Cleavage
bdi-miR393a	MD03G1276700	1	1	21	1768	1788	UCCAAAGGGAUCGCAUUGAUC	::::::::::::::::::	AGACAAUGCGAUCCCUUUGGA	Cleavage
bdi-miR393a	MD11G1299000	1	1	21	1750	1770	UCCAAAGGGAUCGCAUUGAUC	::::::::::::::::::	AGACAAUGCGAUCCCUUUGGA	Cleavage
hbr-miR166a	MD15G1092200	1	1	19	684	702	UCGGACCAGGCUUCAUUCC	::.:::::::::::::::.	GGGAUGAAGCCUGGUCCGG	Cleavage
hbr-miR166a	MD05G1273700	1	1	19	1014	1032	UCGGACCAGGCUUCAUUCC	::.:::::::::::::::.	GGGAUGAAGCCUGGUCCGG	Cleavage
hbr-miR166a	MD08G1112900	1	1	19	991	1009	UCGGACCAGGCUUCAUUCC	::.:::::::::::::::.	GGGAUGAAGCCUGGUCCGG	Cleavage
hbr-miR166a	MD10G1253500	1	1	19	1062	1080	UCGGACCAGGCUUCAUUCC	::.:::::::::::::::.	GGGAUGAAGCCUGGUCCGG	Cleavage
hbr-miR166a	MD11G1136800	1	1	19	1343	1361	UCGGACCAGGCUUCAUUCC	::.:::::::::::::::.	GGGAUGAAGCCUGGUCCGG	Cleavage
hbr-miR166a	MD03G1118500	1	1	19	1515	1533	UCGGACCAGGCUUCAUUCC	::.:::::::::::::::.	GGGAUGAAGCCUGGUCCGG	Cleavage
mdm-miR164cMIMAT0025909	MD11G1253500	1	1	21	873	893	UGGAGAAGCAGGGCACGUGCA	:::::::.::::.:::::::	AGCACGUGUCCUGUUUCUCCA	Cleavage
mdm-miR164cMIMAT0025909	MD10G1198400	1	1	21	669	689	UGGAGAAGCAGGGCACGUGCA	::: ::::::::::::::::	AGCAAGUGCCCUGCUUCUCCA	Cleavage
mdm-miR171bMIMAT0025939	MD07G1115800	1	1	21	1215	1235	UUGAGCCGCGUCAAUAUCUCC	:.:::::::.::::::::::	AGGGAUAUUGGCGCGGCUCAA	Cleavage
mdm-miR171bMIMAT0025939	MD02G1210200	1	1	21	1230	1250	UUGAGCCGCGUCAAUAUCUCC	:.:::::::.::::::::::	AGGGAUAUUGGCGCGGCUCAA	Cleavage
mdm-miR171bMIMAT0025939	MD04G1088100	1	1	21	1388	1408	UUGAGCCGCGUCAAUAUCUCC	:.:::::::.::::::::::	AGGGAUAUUGGCGCGGCUCAA	Cleavage
mdm-miR171bMIMAT0025939	MD00G1043300	1	1	21	1922	1942	UUGAGCCGCGUCAAUAUCUCC	:.:::::::.::::::::::	AGGGAUAUUGGCGCGGCUCAA	Cleavage
mdm-miR3627bMIMAT0026017	MD16G1246100	1	1	20	1146	1165	UCGCAGGAGAGAUGGCACUA	:: ::::::::::::::::	CAGCGCCAUCUCUCCUGCGA	Cleavage
mdm-miR482bMIMAT0026022	MD03G1034100	1	1	22	185	206	UCUUUCCUAUCCCUCCCAUUCC	::::::: ::::::::::::::	GGAAUGGAAGGGAUAGGAAAGA	Cleavage
mdm-miR7125MIMAT0026059	MD05G1247200	1	1	21	271	291	CGAACUUAUUGCAACUAGCUU	::::::::::::::::::::	AAGCUAGUUGCAAUAAGUUCA	Cleavage
t00969484_x10829	MD04G1044900	1	1	24	1767	1790	GUGUCUGAGAGGUAAAAAGGGGUG	..:::::::.::::::::::	GUAAUUUUUUUACUUCUCAGACAC	Cleavage
ath-miR858b	MD09G1183800	1,5	1	21	596	616	UUCGUUGUCUGUUCGACCUUG	: .:::::::::::.::.:::	CCGGGUCGAACAGAUAAUGAA	Cleavage
ath-miR858b	MD04G1060200	1,5	1	21	358	378	UUCGUUGUCUGUUCGACCUUG	: ::: :::::::::::.:::	CCAGGCCGAACAGACAAUGAA	Cleavage
ath-miR858b	MD06G1053100	1,5	1	21	343	363	UUCGUUGUCUGUUCGACCUUG	: ::: :::::::::::.:::	CCAGGCCGAACAGACAAUGAA	Cleavage
ath-miR858b	MD15G1051000	1,5	1	21	331	351	UUCGUUGUCUGUUCGACCUUG	: ::: :::::::::::.:::	CCAGGACGAACAGACAAUGAA	Cleavage
ath-miR858b	MD15G1215500	1,5	1	21	379	399	UUCGUUGUCUGUUCGACCUUG	: ::: :::::::::::.:::	CCAGGGCGAACAGACAAUGAA	Cleavage
ath-miR858b	MD09G1184000	1,5	1	21	403	423	UUCGUUGUCUGUUCGACCUUG	: ::: :::::::::::.:::	CCAGGCCGAACAGACAAUGAA	Cleavage
ath-miR858b	MD02G1087900	1,5	1	21	393	413	UUCGUUGUCUGUUCGACCUUG	: ::: :::::::::::.:::	CCAGGGCGAACAGACAAUGAA	Cleavage
bdi-miR159a-3p	MD11G1215600	1,5	1	20	1101	1120	CUUGGAUUGAAGGGAGCUCU	.::::::::::::: :::::	GGAGCUCCCUUCAAACCAAG	Cleavage
cpa-miR319	MD07G1085000	1,5	1	20	1662	1681	AUUGGACUGAAGGGAGCUCC	::::::::::::: ::::::	GGAGCUCCCUUCACUCCAAU	Cleavage
cpa-miR319	MD02G1269700	1,5	1	20	1760	1779	AUUGGACUGAAGGGAGCUCC	::::::::::::: ::::::	GGAGCUCCCUUCACUCCAAU	Cleavage
mdm-miR159aMIMAT0025898	MD11G1215600	1,5	1	20	1101	1120	CUUGGAUUGAAGGGAGCUCC	:::::::::::::: :::::	GGAGCUCCCUUCAAACCAAG	Cleavage
mdm-miR3627bMIMAT0026017	MD13G1241000	1,5	1	20	333	352	UCGCAGGAGAGAUGGCACUA	.: ::::::::::::::::	CGGCGCCAUCUCUCCUGCGA	Cleavage
mdm-miR3627bMIMAT0026017	MD16G1245600	1,5	1	20	135	154	UCGCAGGAGAGAUGGCACUA	:: :.::::::::::::::	CAGCGUCAUCUCUCCUGCGA	Cleavage
mdm-miR396dMIMAT0025992	MD08G1156100	1,5	1	21	130	150	UUCCACAGCUUUCUUGAACUU	::::::::::::::::: ::	CAGUUCAAGAAAGCUGUGAAA	Cleavage
mdm-miR396dMIMAT0025992	MD15G1126600	1,5	1	21	167	187	UUCCACAGCUUUCUUGAACUU	::::::::::::::::: ::	CAGUUCAAGAAAGCUGUGAAA	Cleavage
mdm-miR482bMIMAT0026022	MD07G1269600	1,5	1	22	151	172	UCUUUCCUAUCCCUCCCAUUCC	::::::::::::::: ::::::	GGAAUGGGAGGGAUAAGAAAGA	Cleavage
mdm-miR482bMIMAT0026022	MD03G1034300	1,5	1	22	2539	2560	UCUUUCCUAUCCCUCCCAUUCC	::::::: ::::.:::::::::	GGAAUGGAAGGGGUAGGAAAGA	Cleavage
mdm-miR7121cMIMAT0026042	MD02G1024300	1,5	1	21	231	251	UCCUCUUGGUGAUCGCCCUGU	::::::.:::.::::::.:::	ACAGGGUGAUUACCAAGGGGA	Cleavage
mdm-miR7121eMIMAT0026044	MD02G1024300	1,5	1	21	231	251	UCCUCUUGGUGAUCGCCCUGC	:::::.:::.::::::.:::	ACAGGGUGAUUACCAAGGGGA	Cleavage
mdm-miR858MIMAT0026070	MD09G1183800	1,5	1	21	596	616	UUCGUUGUCUGUUCGACCUGA	:.:::::::::::.::.:::	CCGGGUCGAACAGAUAAUGAA	Cleavage
mdm-miR858MIMAT0026070	MD04G1060200	1,5	1	21	358	378	UUCGUUGUCUGUUCGACCUGA	:::: :::::::::::.:::	CCAGGCCGAACAGACAAUGAA	Cleavage
mdm-miR858MIMAT0026070	MD06G1053100	1,5	1	21	343	363	UUCGUUGUCUGUUCGACCUGA	:::: :::::::::::.:::	CCAGGCCGAACAGACAAUGAA	Cleavage
mdm-miR858MIMAT0026070	MD15G1051000	1,5	1	21	331	351	UUCGUUGUCUGUUCGACCUGA	:::: :::::::::::.:::	CCAGGACGAACAGACAAUGAA	Cleavage
mdm-miR858MIMAT0026070	MD15G1215500	1,5	1	21	379	399	UUCGUUGUCUGUUCGACCUGA	:::: :::::::::::.:::	CCAGGGCGAACAGACAAUGAA	Cleavage
mdm-miR858MIMAT0026070	MD09G1184000	1,5	1	21	403	423	UUCGUUGUCUGUUCGACCUGA	:::: :::::::::::.:::	CCAGGCCGAACAGACAAUGAA	Cleavage
mdm-miR858MIMAT0026070	MD02G1087900	1,5	1	21	393	413	UUCGUUGUCUGUUCGACCUGA	:::: :::::::::::.:::	CCAGGGCGAACAGACAAUGAA	Cleavage
peu-miR2910	MD10G1068600	1,5	1	21	800	820	UAGUUGGUGGAGCGAUUUGUC	:::::::: ::::::::::	CCCAAAUCGCACCACCAACUA	Translation
ppe-miR858	MD14G1134900	1,5	1	21	115	135	CUCGUUGUCUGUUCGACCUUG	::::::::::::::.:::	CCCGGUCGAACAGACAAUGAG	Cleavage
ppe-miR858	MD01G1084400	1,5	1	21	289	309	CUCGUUGUCUGUUCGACCUUG	: ::::::::: :::::::::	CCAGGUCGAACUGACAACGAG	Translation
ppe-miR858	MD15G1050300	1,5	1	21	394	414	CUCGUUGUCUGUUCGACCUUG	:::::::::::.::::::	CCUGGUCGAACAGAUAACGAG	Cleavage
ppe-miR858	MD05G1243900	1,5	1	21	347	367	CUCGUUGUCUGUUCGACCUUG	: :::: ::::::::::.:::	CCAGGUAGAACAGACAAUGAG	Cleavage
ppe-miR858	MD10G1225800	1,5	1	21	316	336	CUCGUUGUCUGUUCGACCUUG	: :::: ::::::::::.:::	CCAGGUAGAACAGACAAUGAG	Cleavage
ptc-miR159d	MD11G1215600	1,5	1	21	1100	1120	CUUGGAUUGAAGGGAGCUCCU	:::::::::::::: :::::	CGGAGCUCCCUUCAAACCAAG	Cleavage
sit-miR05-npr	MD17G1185400	1,5	1	21	1000	1020	UUUCGGACCAGGCUUCAUUCC	::::::::::::::::::.:	GGAAUGAAGCCUGGUCCGGAU	Cleavage
sit-miR05-npr	MD09G1205400	1,5	1	21	1341	1361	UUUCGGACCAGGCUUCAUUCC	::::::::::::::::::.:	GGAAUGAAGCCUGGUCCGGAU	Cleavage
t00205877_x43290	MD06G1241200	1,5	1	24	1171	1194	ACGGUGAUAAAUAGGGUAGUGAGC	.::::::.:::::::::::..::	AUUCACUAUCCUAUUUAUCAUUGU	Cleavage
t00205877_x43290	MD03G1222900	1,5	1	24	1122	1145	ACGGUGAUAAAUAGGGUAGUGAGC	::. : :::::::::.:::::::	UCUUCCAACCCUAUUUGUCACCGU	Cleavage
t10036822_x303	MD03G1129800	1,5	1	21	1544	1564	AAAUGAGCGGAGUGGAAAGAA	.::::::::..::::::::	GGUUUUCCACUUUGCUCAUUU	Cleavage
t10036822_x303	MD11G1151700	1,5	1	21	1524	1544	AAAUGAGCGGAGUGGAAAGAA	.::::::::..::::::::	GGUUUUCCACUUUGCUCAUUU	Cleavage
t10036822_x303	MD12G1009000	1,5	1	21	2299	2319	AAAUGAGCGGAGUGGAAAGAA	::: :::.:::::::::::	AACUUCCCAUUCCGCUCAUUU	Cleavage
ath-miR858b	MD14G1134900	2	1	21	115	135	UUCGUUGUCUGUUCGACCUUG	::::::::::::::.::.	CCCGGUCGAACAGACAAUGAG	Cleavage
ath-miR858b	MD01G1084400	2	1	21	289	309	UUCGUUGUCUGUUCGACCUUG	: ::::::::: ::::::::.	CCAGGUCGAACUGACAACGAG	Translation
ath-miR858b	MD15G1050300	2	1	21	394	414	UUCGUUGUCUGUUCGACCUUG	:::::::::::.:::::.	CCUGGUCGAACAGAUAACGAG	Cleavage
ath-miR858b	MD00G1092300	2	1	21	488	508	UUCGUUGUCUGUUCGACCUUG	:::::::::::.::.:::	CCUGGUCGAACAGAUAAUGAA	Cleavage
ath-miR858b	MD02G1087500	2	1	21	337	357	UUCGUUGUCUGUUCGACCUUG	:::::::::::.::.:::	CCUGGUCGAACAGAUAAUGAA	Cleavage
ath-miR858b	MD15G1051400	2	1	21	334	354	UUCGUUGUCUGUUCGACCUUG	: .:: :::::::::::.:::	CCGGGGCGAACAGACAAUGAA	Cleavage
ath-miR858b	MD05G1243900	2	1	21	347	367	UUCGUUGUCUGUUCGACCUUG	: :::: ::::::::::.::.	CCAGGUAGAACAGACAAUGAG	Cleavage
ath-miR858b	MD10G1225800	2	1	21	316	336	UUCGUUGUCUGUUCGACCUUG	: :::: ::::::::::.::.	CCAGGUAGAACAGACAAUGAG	Cleavage
ath-miR858b	MD02G1312700	2	1	21	359	379	UUCGUUGUCUGUUCGACCUUG	: ::: :::::.:::::.:::	CCAGGACGAACGGACAAUGAA	Cleavage
ath-miR858b	MD08G1070700	2	1	21	344	364	UUCGUUGUCUGUUCGACCUUG	: .:: :::::::::::.:::	CCGGGGCGAACAGACAAUGAA	Cleavage
ath-miR858b	MD07G1010500	2	1	21	337	357	UUCGUUGUCUGUUCGACCUUG	: ::: :::::.:::::.:::	CCAGGACGAACGGACAAUGAA	Cleavage
ath-miR858b	MD01G1144700	2	1	21	412	432	UUCGUUGUCUGUUCGACCUUG	: :::: :::::::.::::.:	CCAGGUAGAACAGAUAACGGA	Cleavage
bdi-miR159a-3p	MD00G1058800	2	1	20	101	120	CUUGGAUUGAAGGGAGCUCU	.::::::: :::.:::::::	GGAGCUCCAUUCGAUCCAAG	Cleavage
bdi-miR159a-3p	MD07G1101000	2	1	20	101	120	CUUGGAUUGAAGGGAGCUCU	.::::::: :::.:::::::	GGAGCUCCAUUCGAUCCAAG	Cleavage
bdi-miR159a-3p	MD11G1216000	2	1	20	1083	1102	CUUGGAUUGAAGGGAGCUCU	.::::::::::.:: :::::	GGAGCUCCCUUUAAACCAAG	Cleavage
cpa-miR319	MD17G1233500	2	1	20	1271	1290	AUUGGACUGAAGGGAGCUCC	::::. ::::::::::::.:	GGAGUACCCUUCAGUCCAGU	Cleavage
mdm-miR159aMIMAT0025898	MD00G1058800	2	1	20	101	120	CUUGGAUUGAAGGGAGCUCC	:::::::: :::.:::::::	GGAGCUCCAUUCGAUCCAAG	Cleavage
mdm-miR159aMIMAT0025898	MD07G1101000	2	1	20	101	120	CUUGGAUUGAAGGGAGCUCC	:::::::: :::.:::::::	GGAGCUCCAUUCGAUCCAAG	Cleavage
mdm-miR159aMIMAT0025898	MD11G1216000	2	1	20	1083	1102	CUUGGAUUGAAGGGAGCUCC	:::::::::::.:: :::::	GGAGCUCCCUUUAAACCAAG	Cleavage
mdm-miR164cMIMAT0025909	MD03G1190400	2	1	21	192	212	UGGAGAAGCAGGGCACGUGCA	::::: :::.::::::::.::	UGCACUUGCUCUGCUUCUUCA	Cleavage
mdm-miR164cMIMAT0025909	MD17G1051600	2	1	21	900	920	UGGAGAAGCAGGGCACGUGCA	::::::.:::::::.::..	CUCACGUGUCCUGCUUUUCUG	Cleavage
mdm-miR164cMIMAT0025909	MD11G1316400	2	1	21	279	299	UGGAGAAGCAGGGCACGUGCA	::. :::.:::::::::::	CUCAUCUGCUCUGCUUCUCCA	Cleavage
mdm-miR171bMIMAT0025939	MD05G1032800	2	1	21	1205	1225	UUGAGCCGCGUCAAUAUCUCC	::::.::::.:.::::.::	CAAGAUGUUGAUGUGGCUUAA	Cleavage
mdm-miR171bMIMAT0025939	MD16G1126200	2	1	21	2428	2448	UUGAGCCGCGUCAAUAUCUCC	: :::::::::.::::.::	UAAAAUAUUGACGUGGCUUAA	Cleavage
mdm-miR171bMIMAT0025939	MD05G1139800	2	1	21	27	47	UUGAGCCGCGUCAAUAUCUCC	: :::::::::.::::.::	UAAAAUAUUGACGUGGCUUAA	Cleavage
mdm-miR390eMIMAT0025973	MD13G1074300	2	1	21	152	172	AAGCUCAGGAGGGAUAGCGCC	.:.:::.:::.::::::::	ACUGUUAUUCCUUCUGAGCUU	Cleavage
mdm-miR390eMIMAT0025973	MD03G1267800	2	1	21	31	51	AAGCUCAGGAGGGAUAGCGCC	::::: :.::::::.::::	UCCGCUACCUCUCCUGGGCUU	Cleavage
mdm-miR395lMIMAT0043626	MD08G1124700	2	1	21	203	223	CUGAAGUGUUUGGGGGAACCC	:::::.:.::::::::::::	GGGUUUCUCCAAACACUUCAU	Cleavage
mdm-miR395lMIMAT0043626	MD01G1024600	2	1	21	171	191	CUGAAGUGUUUGGGGGAACCC	:::::: ::::::::::::	AGGUUCCACCAAACACUUCAA	Cleavage
mdm-miR395lMIMAT0043626	MD11G1059400	2	1	21	486	506	CUGAAGUGUUUGGGGGAACCC	::::.::.::::::::::	CCGUUCUCCUAAACACUUCAA	Cleavage
mdm-miR396dMIMAT0025992	MD09G1020500	2	1	21	382	402	UUCCACAGCUUUCUUGAACUU	.::: ::::::::.:::::.:	GAGUACAAGAAAGUUGUGGGA	Cleavage
mdm-miR482bMIMAT0026022	MD15G1046900	2	1	22	100	121	UCUUUCCUAUCCCUCCCAUUCC	::.:::::::: ::.:::::::	GGGAUGGGAGGAAUGGGAAAGA	Translation
mdm-miR482bMIMAT0026022	MD08G1098600	2	1	22	646	667	UCUUUCCUAUCCCUCCCAUUCC	::.:::::::: ::.:::::::	GGGAUGGGAGGAAUGGGAAAGA	Translation
mdm-miR482bMIMAT0026022	MD11G1063900	2	1	22	622	643	UCUUUCCUAUCCCUCCCAUUCC	::.:::::::: ::.:::::::	GGGAUGGGAGGUAUGGGAAAGA	Translation
mdm-miR482bMIMAT0026022	MD11G1064900	2	1	22	622	643	UCUUUCCUAUCCCUCCCAUUCC	::.:::::::: ::.:::::::	GGGAUGGGAGGUAUGGGAAAGA	Translation
mdm-miR482bMIMAT0026022	MD08G1043000	2	1	22	637	658	UCUUUCCUAUCCCUCCCAUUCC	::.:::::::: :::::.::::	GGGAUGGGAGGAAUAGGGAAGA	Translation
mdm-miR482bMIMAT0026022	MD11G1063800	2	1	22	622	643	UCUUUCCUAUCCCUCCCAUUCC	::.:::::::: ::.:::::::	GGGAUGGGAGGCAUGGGAAAGA	Translation
mdm-miR482bMIMAT0026022	MD15G1042600	2	1	22	695	716	UCUUUCCUAUCCCUCCCAUUCC	::.:::::::: ::.:::::::	GGGAUGGGAGGAAUGGGAAAGA	Translation
mdm-miR482bMIMAT0026022	MD07G1025200	2	1	22	996	1017	UCUUUCCUAUCCCUCCCAUUCC	:: :::::::: ::.:::::::	GGCAUGGGAGGCAUGGGAAAGA	Translation
mdm-miR482bMIMAT0026022	MD00G1161500	2	1	19	1	19	UCUUUCCUAUCCCUCCCAU	:::::::::: :::.::::	AUGGGAGGGAGAGGGAAGA	Cleavage
mdm-miR482bMIMAT0026022	MD09G1258800	2	1	22	5625	5646	UCUUUCCUAUCCCUCCCAUUCC	.:::: :::::::::..:::	AUGAUGGAAGGGAUAGGGGAGA	Cleavage
mdm-miR858MIMAT0026070	MD01G1084400	2	1	21	289	309	UUCGUUGUCUGUUCGACCUGA	:::::::::: ::::::::.	CCAGGUCGAACUGACAACGAG	Translation
mdm-miR858MIMAT0026070	MD14G1134900	2	1	21	115	135	UUCGUUGUCUGUUCGACCUGA	: ::::::::::::::.::.	CCCGGUCGAACAGACAAUGAG	Cleavage
mdm-miR858MIMAT0026070	MD15G1051400	2	1	21	334	354	UUCGUUGUCUGUUCGACCUGA	:.:: :::::::::::.:::	CCGGGGCGAACAGACAAUGAA	Cleavage
mdm-miR858MIMAT0026070	MD15G1050300	2	1	21	394	414	UUCGUUGUCUGUUCGACCUGA	: :::::::::::.:::::.	CCUGGUCGAACAGAUAACGAG	Cleavage
mdm-miR858MIMAT0026070	MD00G1092300	2	1	21	488	508	UUCGUUGUCUGUUCGACCUGA	: :::::::::::.::.:::	CCUGGUCGAACAGAUAAUGAA	Cleavage
mdm-miR858MIMAT0026070	MD02G1087500	2	1	21	337	357	UUCGUUGUCUGUUCGACCUGA	: :::::::::::.::.:::	CCUGGUCGAACAGAUAAUGAA	Cleavage
mdm-miR858MIMAT0026070	MD05G1243900	2	1	21	347	367	UUCGUUGUCUGUUCGACCUGA	::::: ::::::::::.::.	CCAGGUAGAACAGACAAUGAG	Cleavage
mdm-miR858MIMAT0026070	MD10G1225800	2	1	21	316	336	UUCGUUGUCUGUUCGACCUGA	::::: ::::::::::.::.	CCAGGUAGAACAGACAAUGAG	Cleavage
mdm-miR858MIMAT0026070	MD02G1312700	2	1	21	359	379	UUCGUUGUCUGUUCGACCUGA	:::: :::::.:::::.:::	CCAGGACGAACGGACAAUGAA	Cleavage
mdm-miR858MIMAT0026070	MD08G1070700	2	1	21	344	364	UUCGUUGUCUGUUCGACCUGA	:.:: :::::::::::.:::	CCGGGGCGAACAGACAAUGAA	Cleavage
mdm-miR858MIMAT0026070	MD07G1010500	2	1	21	337	357	UUCGUUGUCUGUUCGACCUGA	:::: :::::.:::::.:::	CCAGGACGAACGGACAAUGAA	Cleavage
mdm-miR858MIMAT0026070	MD01G1144700	2	1	21	412	432	UUCGUUGUCUGUUCGACCUGA	::::: :::::::.::::.:	CCAGGUAGAACAGAUAACGGA	Cleavage
mes-miR319h	MD02G1242500	2	1	21	1643	1663	CUUGGACUGAAGGGAGCUCCU	:::: ::.:.:::::::::::	AGGAACUUCUUUCAGUCCAAG	Cleavage
mes-miR319h	MD07G1074000	2	1	21	1737	1757	CUUGGACUGAAGGGAGCUCCU	:::: ::.:.:::::::::::	AGGAACUUCUUUCAGUCCAAG	Cleavage
peu-miR2910	MD05G1060800	2	1	21	878	898	UAGUUGGUGGAGCGAUUUGUC	:::::.:: ::::::::::	CCCAAAUUGCGCCACCAACUA	Translation
ppe-miR858	MD08G1070900	2	1	21	289	309	CUCGUUGUCUGUUCGACCUUG	: :::::: ::::::::.:::	CCAGGUCGUACAGACAAUGAG	Cleavage
ppe-miR858	MD16G1028800	2	1	21	954	974	CUCGUUGUCUGUUCGACCUUG	:::::::: :::::.::::	AUAGGUCGAAGAGACAGCGAG	Translation
ppe-miR858	MD15G1215400	2	1	21	289	309	CUCGUUGUCUGUUCGACCUUG	: .:: :::::::::::.:::	CCGGGGCGAACAGACAAUGAG	Cleavage
ppe-miR858	MD11G1216000	2	1	21	379	399	CUCGUUGUCUGUUCGACCUUG	:: :::::::::::::::	CCUGGACGAACAGACAACGAG	Cleavage
ptc-miR159d	MD00G1058800	2	1	21	100	120	CUUGGAUUGAAGGGAGCUCCU	:::::::: :::.:::::::	UGGAGCUCCAUUCGAUCCAAG	Cleavage
ptc-miR159d	MD07G1101000	2	1	21	100	120	CUUGGAUUGAAGGGAGCUCCU	:::::::: :::.:::::::	UGGAGCUCCAUUCGAUCCAAG	Cleavage
ptc-miR159d	MD11G1216000	2	1	21	1082	1102	CUUGGAUUGAAGGGAGCUCCU	:::::::::::.:: :::::	CGGAGCUCCCUUUAAACCAAG	Cleavage
sit-miR05-npr	MD15G1092200	2	1	21	684	704	UUUCGGACCAGGCUUCAUUCC	::.:::::::::::::::.:	GGGAUGAAGCCUGGUCCGGAU	Cleavage
sit-miR05-npr	MD05G1273700	2	1	21	1014	1034	UUUCGGACCAGGCUUCAUUCC	::.:::::::::::::::.:	GGGAUGAAGCCUGGUCCGGAU	Cleavage
sit-miR05-npr	MD08G1112900	2	1	21	991	1011	UUUCGGACCAGGCUUCAUUCC	::.:::::::::::::::.:	GGGAUGAAGCCUGGUCCGGAU	Cleavage
sit-miR05-npr	MD10G1253500	2	1	21	1062	1082	UUUCGGACCAGGCUUCAUUCC	::.:::::::::::::::.:	GGGAUGAAGCCUGGUCCGGAU	Cleavage
sit-miR05-npr	MD11G1136800	2	1	21	1343	1363	UUUCGGACCAGGCUUCAUUCC	::.:::::::::::::::.:	GGGAUGAAGCCUGGUCCGGAU	Cleavage
sit-miR05-npr	MD03G1118500	2	1	21	1515	1535	UUUCGGACCAGGCUUCAUUCC	::.:::::::::::::::.:	GGGAUGAAGCCUGGUCCGGAU	Cleavage
sit-miR05-npr	MD15G1443800	2	1	21	3314	3334	UUUCGGACCAGGCUUCAUUCC	:.::.:::::::::.:.::	ACAGUGGAGCCUGGUCUGGAA	Cleavage
sit-miR05-npr	MD01G1173800	2	1	21	547	567	UUUCGGACCAGGCUUCAUUCC	:.:: :::::::::.::::	CAAGUGUAGCCUGGUCUGAAA	Cleavage
t00205877_x43290	MD09G1032400	2	1	24	1632	1655	ACGGUGAUAAAUAGGGUAGUGAGC	:::.:: :.:.:::::::::::::	GCUUACCAUCUUAUUUAUCACCGU	Cleavage
t00370463_x599	MD15G1109700	2	1	24	1738	1761	AUCCCGUGAUCGUGACCGUUCAUC	::::::::::.:: ::::::::::	GAUGAACGGUUACCAUCACGGGAU	Translation
t00370463_x599	MD16G1156700	2	1	24	661	684	AUCCCGUGAUCGUGACCGUUCAUC	::::::::::::.:::::: ::::	GAUGAACGGUCAUGAUCACAGGAU	Cleavage
t00969484_x10829	MD05G1122500	2	1	24	1868	1891	GUGUCUGAGAGGUAAAAAGGGGUG	:::::::::::::.::::: ::::	CACCCCUUUUUACUUCUCACACAC	Cleavage
t00969484_x10829	MD11G1315700	2	1	24	1048	1071	GUGUCUGAGAGGUAAAAAGGGGUG	:::.:::::::::.::::: ::::	CACUCCUUUUUACUUCUCACACAC	Cleavage
t00969484_x10829	MD03G1102100	2	1	24	905	928	GUGUCUGAGAGGUAAAAAGGGGUG	.:::.::::::::::::.: ::::	UACCUCUUUUUACCUCUUACACAC	Cleavage
t00969484_x10829	MD05G1024500	2	1	24	1935	1958	GUGUCUGAGAGGUAAAAAGGGGUG	::.:.::::::::.::::: ::::	CAUCUCUUUUUACUUCUCACACAC	Cleavage
t00969484_x10829	MD13G1056900	2	1	24	2435	2458	GUGUCUGAGAGGUAAAAAGGGGUG	:::.:.:::: :.:::::::::::	CACUCUUUUUAAUCUCUCAGACAC	Cleavage
t00969484_x10829	MD05G1301000	2	1	24	699	722	GUGUCUGAGAGGUAAAAAGGGGUG	::: :::::::::::.::: ::::	CACGCCUUUUUACCUUUCACACAC	Cleavage
t00969484_x10829	MD15G1413000	2	1	24	1835	1858	GUGUCUGAGAGGUAAAAAGGGGUG	::.: ::::::::.::::: ::::	CAUCACUUUUUACUUCUCACACAC	Cleavage
t00969484_x10829	MD02G1277900	2	1	24	3926	3949	GUGUCUGAGAGGUAAAAAGGGGUG	::::::: :::::::::.::.	AUGCCCUUUUGACCUCUCAGGCAU	Cleavage
t01163329_x11463	MD12G1257300	2	1	24	5048	5071	GUUUUUGAAUGAAAGGCUCAUGUG	::::::::::::: :::.::	AUAUUGAGCCUUUCAUUGAAAGAC	Cleavage
t01163329_x11463	MD04G1240400	2	1	24	5019	5042	GUUUUUGAAUGAAAGGCUCAUGUG	::::::::::::: :::.::	AUAUUGAGCCUUUCAUUGAAAGAC	Cleavage
t01163329_x11463	MD08G1186900	2	1	24	1030	1053	GUUUUUGAAUGAAAGGCUCAUGUG	::::.:::.::::::.:.:	UUUUGGAGCUUUUUAUUCAAGAGC	Cleavage
t05229383_x4081	MD12G1178300	2	1	21	1035	1055	CUUGCAUAUCUCAGGAGCUGC	.::.::.::::.:.::::::	CUAGUUCUUGAGGUGUGCAAG	Cleavage
t05229383_x4081	MD08G1134700	2	1	21	951	971	CUUGCAUAUCUCAGGAGCUGC	:: : ::::::::::::::	UGAGAUACUGAGAUAUGCAAG	Cleavage
t06991240_x100	MD13G1195400	2	1	24	806	829	AAGUGAGUUUUGUGUGGAUGUUUC	::.: : ::::::::::::::::	GAGAAAAACACACAAAACUCACUU	Cleavage
t07833554_x78	MD10G1044900	2	1	22	1042	1063	UCCUCAUUCUUCGUCUUCCUUC	.:::::::.::::: ::::::	AGAGGAAGAUGAAGACUGAGGA	Cleavage
t07833554_x78	MD06G1072000	2	1	22	29	50	UCCUCAUUCUUCGUCUUCCUUC	..::::::.:::::: :::::	UGGGGAAGAUGAAGAACGAGGA	Cleavage
t07833554_x78	MD04G1068500	2	1	22	63	84	UCCUCAUUCUUCGUCUUCCUUC	..::::::.:::::: :::::	UGGGGAAGAUGAAGAACGAGGA	Cleavage
t07833554_x78	MD17G1141700	2	1	22	864	885	UCCUCAUUCUUCGUCUUCCUUC	: :::::.:::::::::::.	UUAAGAAGAUGAAGAAUGAGGG	Cleavage
t07833554_x78	MD02G1004800	2	1	22	1674	1695	UCCUCAUUCUUCGUCUUCCUUC	: ::::.::::.:::::::	CUCGCAAGAUGAAGGAUGAGGA	Cleavage
t10212079_x3461	MD17G1244000	2	1	24	154	177	GUUUUUGAAUGGAAGACUCAUGUG	:::::.:::..::::.::::	UCGUUGAGUUUUCUGUUCAGAAAC	Cleavage
t10212079_x3461	MD15G1147000	2	1	24	465	488	GUUUUUGAAUGGAAGACUCAUGUG	:. ::::::::::.:::::	AUGCCGGCUCUUCCAUUCGAAAAC	Cleavage
t11329296_x5768	MD01G1196600	2	1	21	68	88	UAUAUGGAGGGAAAUAUGGUG	: ::::::::.:::::: :::	CUCCAUAUUUUCCUCCAAAUA	Cleavage
t11329296_x5768	MD07G1219300	2	1	21	36	56	UAUAUGGAGGGAAAUAUGGUG	.::::: :::::::::::::	UACCAUCCUUCCCUCCAUAUA	Cleavage
t11329296_x5768	MD01G1151900	2	1	21	519	539	UAUAUGGAGGGAAAUAUGGUG	.::::: :::::::::::::	UACCAUCCUUCCCUCCAUAUA	Cleavage
ath-miR858b	MD16G1119800	2,5	1	21	323	343	UUCGUUGUCUGUUCGACCUUG	:.:::.:..:::::.:::::	GAGGGUUGGGCAGACGACGAA	Cleavage
ath-miR858b	MD14G1012300	2,5	1	21	1808	1828	UUCGUUGUCUGUUCGACCUUG	...::::::::: :.::::::	UGGGGUCGAACAAAUAACGAA	Cleavage
ath-miR858b	MD07G1277000	2,5	1	21	1493	1513	UUCGUUGUCUGUUCGACCUUG	.::::.::::: ::::::.:	GGAGGUUGAACAAACAACGGA	Cleavage
ath-miR858b	MD08G1070900	2,5	1	21	289	309	UUCGUUGUCUGUUCGACCUUG	: :::::: ::::::::.::.	CCAGGUCGUACAGACAAUGAG	Cleavage
ath-miR858b	MD01G1031700	2,5	1	21	237	257	UUCGUUGUCUGUUCGACCUUG	:::::.::.:::::.:::	CCCGGUCGGACGGACAAUGAA	Cleavage
ath-miR858b	MD15G1323500	2,5	1	21	328	348	UUCGUUGUCUGUUCGACCUUG	:::::.::.:::::.:::	CCCGGUCGGACGGACAAUGAA	Cleavage
ath-miR858b	MD16G1028800	2,5	1	21	954	974	UUCGUUGUCUGUUCGACCUUG	:::::::: :::::.:::.	AUAGGUCGAAGAGACAGCGAG	Translation
ath-miR858b	MD15G1302300	2,5	1	21	292	312	UUCGUUGUCUGUUCGACCUUG	: ::: :::::.::::::::	CCAGGGCGAACGGACAACGAU	Cleavage
ath-miR858b	MD02G1191000	2,5	1	21	312	332	UUCGUUGUCUGUUCGACCUUG	: ::: :::::.::::::::	CCAGGGCGAACGGACAACGAU	Cleavage
ath-miR858b	MD15G1215100	2,5	1	21	375	395	UUCGUUGUCUGUUCGACCUUG	:::: :::::::::.:::	CCCGGUCAAACAGACAAUGAA	Cleavage
ath-miR858b	MD15G1215400	2,5	1	21	289	309	UUCGUUGUCUGUUCGACCUUG	: .:: :::::::::::.::.	CCGGGGCGAACAGACAAUGAG	Cleavage
ath-miR858b	MD11G1216000	2,5	1	21	379	399	UUCGUUGUCUGUUCGACCUUG	:: ::::::::::::::.	CCUGGACGAACAGACAACGAG	Cleavage
ath-miR858b	MD04G1229400	2,5	1	21	103	123	UUCGUUGUCUGUUCGACCUUG	: ::: :.::::::::::::	CCAGGCAGGACAGACAACGAA	Cleavage
bdi-miR159a-3p	MD07G1085000	2,5	1	20	1662	1681	CUUGGAUUGAAGGGAGCUCU	.:::::::::::: :::::	GGAGCUCCCUUCACUCCAAU	Cleavage
bdi-miR159a-3p	MD02G1269700	2,5	1	20	1760	1779	CUUGGAUUGAAGGGAGCUCU	.:::::::::::: :::::	GGAGCUCCCUUCACUCCAAU	Cleavage
bdi-miR159a-3p	MD02G1259600	2,5	1	20	1305	1324	CUUGGAUUGAAGGGAGCUCU	::.:: :::::::::..:::	AGGGCACCCUUCAAUUUAAG	Cleavage
bdi-miR159a-3p	MD02G1242500	2,5	1	20	1644	1663	CUUGGAUUGAAGGGAGCUCU	.:: ::.:.::::.::::::	GGAACUUCUUUCAGUCCAAG	Cleavage
bdi-miR159a-3p	MD07G1074000	2,5	1	20	1738	1757	CUUGGAUUGAAGGGAGCUCU	.:: ::.:.::::.::::::	GGAACUUCUUUCAGUCCAAG	Cleavage
bdi-miR159a-3p	MD04G1177800	2,5	1	20	1295	1314	CUUGGAUUGAAGGGAGCUCU	: :::::::::::.::::	GUAUCUCCCUUCAAUUCAAG	Cleavage
bdi-miR159a-3p	MD17G1084700	2,5	1	20	1955	1974	CUUGGAUUGAAGGGAGCUCU	: :.:.::::::::.::::	UGCGUUUCCUUCAAUUCAAG	Cleavage
bdi-miR393a	MD13G1168100	2,5	1	21	621	641	UCCAAAGGGAUCGCAUUGAUC	:. :::::.:::..:::::::	GGGCAAUGUGAUUUCUUUGGA	Cleavage
cpa-miR319	MD09G1232700	2,5	1	20	1046	1065	AUUGGACUGAAGGGAGCUCC	::.:. ::::::::::::.:	GGGGUACCCUUCAGUCCAGU	Cleavage
cpa-miR319	MD15G1151800	2,5	1	20	562	581	AUUGGACUGAAGGGAGCUCC	:.:::.::::::::.:::	CGGGCUUCCUUCAGUUCAAA	Cleavage
cpa-miR319	MD15G1290500	2,5	1	20	1114	1133	AUUGGACUGAAGGGAGCUCC	:.:::...::::::.::::	CGGGCUUUUUUCAGUUCAAU	Cleavage
cpa-miR319	MD10G1259500	2,5	1	20	2073	2092	AUUGGACUGAAGGGAGCUCC	::.: ::::::::::::::	GGGGGACCCUUCAGUCCAAU	Cleavage
cpa-miR319	MD05G1281100	2,5	1	20	2107	2126	AUUGGACUGAAGGGAGCUCC	::.: ::::::::::::::	GGGGGACCCUUCAGUCCAAU	Cleavage
hbr-miR166a	MD13G1036400	2,5	1	19	814	832	UCGGACCAGGCUUCAUUCC	:::::::.::::::: .::	GGAAUGAGGCCUGGUGUGA	Cleavage
hbr-miR166a	MD16G1039000	2,5	1	19	881	899	UCGGACCAGGCUUCAUUCC	:::::::.::::::: .::	GGAAUGAGGCCUGGUGUGA	Cleavage
hbr-miR166a	MD06G1010000	2,5	1	19	1424	1442	UCGGACCAGGCUUCAUUCC	::::: :::..:::::::.	GGAAUCAAGUUUGGUCCGG	Cleavage
lus-miR167a	MD15G1204800	2,5	1	21	527	547	UGAAGCUGCCAGCAUGAUCUC	:: ::::::::.::::::	CCGAGGAUGCUGGCGGCUUCA	Cleavage
lus-miR167a	MD10G1173700	2,5	1	21	445	465	UGAAGCUGCCAGCAUGAUCUC	:.: : :::::::::::::	AUGGUAAAGCUGGCAGCUUCA	Cleavage
mdm-miR159aMIMAT0025898	MD07G1085000	2,5	1	20	1662	1681	CUUGGAUUGAAGGGAGCUCC	::::::::::::: :::::	GGAGCUCCCUUCACUCCAAU	Cleavage
mdm-miR159aMIMAT0025898	MD02G1269700	2,5	1	20	1760	1779	CUUGGAUUGAAGGGAGCUCC	::::::::::::: :::::	GGAGCUCCCUUCACUCCAAU	Cleavage
mdm-miR159aMIMAT0025898	MD02G1242500	2,5	1	20	1644	1663	CUUGGAUUGAAGGGAGCUCC	::: ::.:.::::.::::::	GGAACUUCUUUCAGUCCAAG	Cleavage
mdm-miR159aMIMAT0025898	MD07G1074000	2,5	1	20	1738	1757	CUUGGAUUGAAGGGAGCUCC	::: ::.:.::::.::::::	GGAACUUCUUUCAGUCCAAG	Cleavage
mdm-miR159aMIMAT0025898	MD04G1177800	2,5	1	20	1295	1314	CUUGGAUUGAAGGGAGCUCC	: : :::::::::::.::::	GUAUCUCCCUUCAAUUCAAG	Cleavage
mdm-miR159aMIMAT0025898	MD02G1259600	2,5	1	20	1305	1324	CUUGGAUUGAAGGGAGCUCC	:.:: :::::::::..:::	AGGGCACCCUUCAAUUUAAG	Cleavage
mdm-miR159aMIMAT0025898	MD17G1084700	2,5	1	20	1955	1974	CUUGGAUUGAAGGGAGCUCC	: :.:.::::::::.::::	UGCGUUUCCUUCAAUUCAAG	Cleavage
mdm-miR164cMIMAT0025909	MD09G1053700	2,5	1	21	916	936	UGGAGAAGCAGGGCACGUGCA	::::::.: :::::::::.	CUCACGUGUCGUGCUUCUCCG	Translation
mdm-miR164cMIMAT0025909	MD04G1022200	2,5	1	21	164	184	UGGAGAAGCAGGGCACGUGCA	: ..: :::.:::::::::::	UCUGCUUGCUCUGCUUCUCCA	Cleavage
mdm-miR164cMIMAT0025909	MD01G1125200	2,5	1	21	676	696	UGGAGAAGCAGGGCACGUGCA	..: ::.::::::::::::	CUUGCCUGUCCUGCUUCUCCA	Cleavage
mdm-miR164cMIMAT0025909	MD15G1216000	2,5	1	21	543	563	UGGAGAAGCAGGGCACGUGCA	:.: ::..:::::::::::	AACGCUUGUUCUGCUUCUCCA	Cleavage
mdm-miR164cMIMAT0025909	MD16G1277100	2,5	1	21	698	718	UGGAGAAGCAGGGCACGUGCA	::. :::.:::.:::::::	CACAUCUGCUCUGUUUCUCCA	Cleavage
mdm-miR164cMIMAT0025909	MD03G1296800	2,5	1	21	411	431	UGGAGAAGCAGGGCACGUGCA	::. :::.:::.:::::::	CACAUCUGCUCUGUUUCUCCA	Cleavage
mdm-miR164cMIMAT0025909	MD04G1089900	2,5	1	21	287	307	UGGAGAAGCAGGGCACGUGCA	::. :::.:::.:::::::	CACAUCUGCUCUGUUUCUCCA	Cleavage
mdm-miR171bMIMAT0025939	MD14G1102200	2,5	1	21	954	974	UUGAGCCGCGUCAAUAUCUCC	:::::::.:::::::..:	GUCGAUAUUGGCGCGGCUUGA	Cleavage
mdm-miR171bMIMAT0025939	MD12G1179300	2,5	1	21	452	472	UUGAGCCGCGUCAAUAUCUCC	: ::.::::::.::::.::	UAAAAUGUUGACGUGGCUUAA	Cleavage
mdm-miR390eMIMAT0025973	MD16G1148700	2,5	1	21	231	251	AAGCUCAGGAGGGAUAGCGCC	::.:::::::. :::::::::	GGUGCUAUCCUACCUGAGCUU	Translation
mdm-miR390eMIMAT0025973	MD04G1039800	2,5	1	21	535	555	AAGCUCAGGAGGGAUAGCGCC	::::::::.::::::::	UCUUCUAUCCCUUCUGAGCUU	Cleavage
mdm-miR390eMIMAT0025973	MD05G1190800	2,5	1	21	562	582	AAGCUCAGGAGGGAUAGCGCC	::::::::.::::::::	UCUUCUAUCCCUUCUGAGCUU	Cleavage
mdm-miR390eMIMAT0025973	MD00G1124100	2,5	1	21	409	429	AAGCUCAGGAGGGAUAGCGCC	::::::::.::::::::	UCUUCUAUCCCUUCUGAGCUU	Cleavage
mdm-miR390eMIMAT0025973	MD00G1124500	2,5	1	21	676	696	AAGCUCAGGAGGGAUAGCGCC	::::::::.::::::::	UCUUCUAUCCCUUCUGAGCUU	Cleavage
mdm-miR390eMIMAT0025973	MD04G1006600	2,5	1	21	870	890	AAGCUCAGGAGGGAUAGCGCC	::::::::.::::::::	UCUUCUAUCCCUUCUGAGCUU	Cleavage
mdm-miR390eMIMAT0025973	MD00G1170400	2,5	1	21	18	38	AAGCUCAGGAGGGAUAGCGCC	::::::::.::::::::	UCUUCUAUCCCUUCUGAGCUU	Cleavage
mdm-miR390eMIMAT0025973	MD00G1170700	2,5	1	21	784	804	AAGCUCAGGAGGGAUAGCGCC	::::::::.::::::::	UCUUCUAUCCCUUCUGAGCUU	Cleavage
mdm-miR390eMIMAT0025973	MD00G1009600	2,5	1	21	436	456	AAGCUCAGGAGGGAUAGCGCC	::::::::.::::::::	UCUUCUAUCCCUUCUGAGCUU	Cleavage
mdm-miR390eMIMAT0025973	MD05G1190400	2,5	1	21	223	243	AAGCUCAGGAGGGAUAGCGCC	::::::::.::::::::	UCUUCUAUCCCUUCUGAGCUU	Cleavage
mdm-miR390eMIMAT0025973	MD00G1124700	2,5	1	21	781	801	AAGCUCAGGAGGGAUAGCGCC	::::::::.::::::::	UCUUCUAUCCCUUCUGAGCUU	Cleavage
mdm-miR390eMIMAT0025973	MD00G1124700	2,5	1	21	1357	1377	AAGCUCAGGAGGGAUAGCGCC	::::::::.::::::::	UCUUCUAUCCCUUCUGAGCUU	Cleavage
mdm-miR390eMIMAT0025973	MD14G1017600	2,5	1	21	452	472	AAGCUCAGGAGGGAUAGCGCC	:::.:.:::.::::::::	GCGGCUGUUCCUUCUGAGCUU	Cleavage
mdm-miR390eMIMAT0025973	MD00G1066800	2,5	1	21	406	426	AAGCUCAGGAGGGAUAGCGCC	::::::.:.::::::: ::	UACGCUAUUCUUCCUGAGGUU	Cleavage
mdm-miR390eMIMAT0025973	MD08G1159600	2,5	1	21	6122	6142	AAGCUCAGGAGGGAUAGCGCC	: :: :::.:::::::.:.::	GACGAUAUUCCUCCUGGGUUU	Cleavage
mdm-miR390eMIMAT0025973	MD16G1063500	2,5	1	21	758	778	AAGCUCAGGAGGGAUAGCGCC	.:::: .:.::::::::::	CUUGCUAAUCUUCCUGAGCUU	Cleavage
mdm-miR390eMIMAT0025973	MD13G1065200	2,5	1	21	775	795	AAGCUCAGGAGGGAUAGCGCC	.:::: .:.::::::::::	CUUGCUAAUCUUCCUGAGCUU	Cleavage
mdm-miR395lMIMAT0043626	MD03G1096700	2,5	1	21	979	999	CUGAAGUGUUUGGGGGAACCC	: ::::.::::::::::::	AGUUUCCUCCAAACACUUCAA	Cleavage
mdm-miR395lMIMAT0043626	MD06G1161400	2,5	1	21	684	704	CUGAAGUGUUUGGGGGAACCC	: : :::::::..::::::.:	GAGCUCCCCCAGGCACUUCGG	Cleavage
mdm-miR396dMIMAT0025992	MD14G1135600	2,5	1	21	1135	1155	UUCCACAGCUUUCUUGAACUU	::::::.::::::::::	CUAUUCAAGGAAGCUGUGGAU	Cleavage
mdm-miR396dMIMAT0025992	MD10G1169400	2,5	1	21	391	411	UUCCACAGCUUUCUUGAACUU	::.:::.:.:::::::::	CUUUUUAAGGAGGCUGUGGAA	Cleavage
mdm-miR396dMIMAT0025992	MD13G1048200	2,5	1	21	475	495	UUCCACAGCUUUCUUGAACUU	.::::: :.:::::::::::	GAGUUCCCGGAAGCUGUGGAA	Cleavage
mdm-miR396dMIMAT0025992	MD13G1048300	2,5	1	21	502	522	UUCCACAGCUUUCUUGAACUU	.::::: :.:::::::::::	GAGUUCCCGGAAGCUGUGGAA	Cleavage
mdm-miR396dMIMAT0025992	MD14G1135300	2,5	1	21	951	971	UUCCACAGCUUUCUUGAACUU	: ::::::::.::: ::::.:	AUGUUCAAGAGAGCAGUGGGA	Cleavage
mdm-miR396dMIMAT0025992	MD06G1114000	2,5	1	21	1015	1035	UUCCACAGCUUUCUUGAACUU	: ::::::::.::: ::::.:	AUGUUCAAGAGAGCAGUGGGA	Cleavage
mdm-miR396dMIMAT0025992	MD05G1179700	2,5	1	21	808	828	UUCCACAGCUUUCUUGAACUU	::.:::.:.:::::::::	UUUUUUAAGGAGGCUGUGGAA	Cleavage
mdm-miR396dMIMAT0025992	MD16G1285900	2,5	1	21	1178	1198	UUCCACAGCUUUCUUGAACUU	::::.:.::::::::::.	ACUUUCAGGGAAGCUGUGGAG	Cleavage
mdm-miR396dMIMAT0025992	MD06G1010900	2,5	1	21	1165	1185	UUCCACAGCUUUCUUGAACUU	::::.:.::::::::::.	ACUUUCAGGGAAGCUGUGGAG	Cleavage
mdm-miR396dMIMAT0025992	MD14G1197700	2,5	1	21	103	123	UUCCACAGCUUUCUUGAACUU	.:: :::::.::.::::::.	CGGUCCAAGAGAGUUGUGGAG	Cleavage
mdm-miR396dMIMAT0025992	MD12G1229100	2,5	1	21	537	557	UUCCACAGCUUUCUUGAACUU	.:: ..::.:::::::::::	UGGUAUGAGGAAGCUGUGGAA	Cleavage
mdm-miR482bMIMAT0026022	MD17G1205000	2,5	1	22	181	202	UCUUUCCUAUCCCUCCCAUUCC	::::::::::::.:.:: ::::	GGAAUGGGAGGGGUGGGCAAGA	Cleavage
mdm-miR482bMIMAT0026022	MD17G1205300	2,5	1	22	553	574	UCUUUCCUAUCCCUCCCAUUCC	::::::::::::.:.:: ::::	GGAAUGGGAGGGGUGGGUAAGA	Cleavage
mdm-miR482bMIMAT0026022	MD17G1204800	2,5	1	22	550	571	UCUUUCCUAUCCCUCCCAUUCC	::::::::::::.:.:: ::::	GGAAUGGGAGGGGUGGGCAAGA	Cleavage
mdm-miR482bMIMAT0026022	MD06G1024500	2,5	1	22	580	601	UCUUUCCUAUCCCUCCCAUUCC	::::::::::: ::.::.::::	GGAAUGGGAGGAAUGGGGAAGA	Translation
mdm-miR482bMIMAT0026022	MD08G1104200	2,5	1	22	646	667	UCUUUCCUAUCCCUCCCAUUCC	::.:::::::: ::.::.::::	GGGAUGGGAGGAAUGGGGAAGA	Translation
mdm-miR482bMIMAT0026022	MD05G1138500	2,5	1	22	965	986	UCUUUCCUAUCCCUCCCAUUCC	:::::::: ::::: :::::::	GGAAUGGGUGGGAUUGGAAAGA	Cleavage
mdm-miR482bMIMAT0026022	MD08G1096800	2,5	1	22	646	667	UCUUUCCUAUCCCUCCCAUUCC	::.:::::::: ::.::.::::	GGGAUGGGAGGAAUGGGGAAGA	Translation
mdm-miR482bMIMAT0026022	MD08G1094300	2,5	1	22	646	667	UCUUUCCUAUCCCUCCCAUUCC	::.:::::::: ::.::.::::	GGGAUGGGAGGAAUGGGGAAGA	Translation
mdm-miR482bMIMAT0026022	MD09G1055800	2,5	1	22	550	571	UCUUUCCUAUCCCUCCCAUUCC	::.:::::::::.:.:: ::::	GGGAUGGGAGGGGUGGGUAAGA	Cleavage
mdm-miR482bMIMAT0026022	MD08G1097100	2,5	1	22	649	670	UCUUUCCUAUCCCUCCCAUUCC	::.:::::::: ::.::.::::	GGGAUGGGAGGAAUGGGGAAGA	Translation
mdm-miR482bMIMAT0026022	MD08G1093300	2,5	1	22	646	667	UCUUUCCUAUCCCUCCCAUUCC	::.:::::::: ::.::.::::	GGGAUGGGAGGAAUGGGGAAGA	Translation
mdm-miR482bMIMAT0026022	MD08G1099900	2,5	1	22	680	701	UCUUUCCUAUCCCUCCCAUUCC	::.:::::::: ::.::.::::	GGGAUGGGAGGAAUGGGGAAGA	Translation
mdm-miR482bMIMAT0026022	MD03G1045400	2,5	1	22	700	721	UCUUUCCUAUCCCUCCCAUUCC	::.:::::::: ::.::.::::	GGGAUGGGAGGAAUGGGGAAGA	Translation
mdm-miR482bMIMAT0026022	MD10G1006800	2,5	1	22	761	782	UCUUUCCUAUCCCUCCCAUUCC	:::::::: :::::::: ::::	GGAAUGGGUGGGAUAGGCAAGA	Cleavage
mdm-miR482bMIMAT0026022	MD10G1006400	2,5	1	22	1230	1251	UCUUUCCUAUCCCUCCCAUUCC	::.::::: :::::::: ::::	GGGAUGGGUGGGAUAGGCAAGA	Cleavage
mdm-miR482bMIMAT0026022	MD08G1129500	2,5	1	22	631	652	UCUUUCCUAUCCCUCCCAUUCC	:: ::::::::::: ::::::	GGCAUGGGAGGGAUCGGAAAGU	Cleavage
mdm-miR482bMIMAT0026022	MD06G1024300	2,5	1	22	583	604	UCUUUCCUAUCCCUCCCAUUCC	:: :::::::: ::.::.::::	GGCAUGGGAGGUAUGGGGAAGA	Translation
mdm-miR482bMIMAT0026022	MD00G1072900	2,5	1	22	418	439	UCUUUCCUAUCCCUCCCAUUCC	:: ::::: ::::: :::::::	GGUAUGGGCGGGAUCGGAAAGA	Cleavage
mdm-miR482bMIMAT0026022	MD00G1120900	2,5	1	22	601	622	UCUUUCCUAUCCCUCCCAUUCC	:: ::::: ::::: :::::::	GGCAUGGGUGGGAUCGGAAAGA	Cleavage
mdm-miR482bMIMAT0026022	MD03G1072200	2,5	1	22	610	631	UCUUUCCUAUCCCUCCCAUUCC	:: ::::: ::::: :::::::	GGCAUGGGUGGGAUCGGAAAGA	Cleavage
mdm-miR482bMIMAT0026022	MD11G1078500	2,5	1	22	601	622	UCUUUCCUAUCCCUCCCAUUCC	:: ::::: ::::: :::::::	GGCAUGGGUGGGAUCGGAAAGA	Cleavage
mdm-miR482bMIMAT0026022	MD11G1078300	2,5	1	22	601	622	UCUUUCCUAUCCCUCCCAUUCC	:: ::::: ::::: :::::::	GGCAUGGGUGGGAUCGGAAAGA	Cleavage
mdm-miR482bMIMAT0026022	MD00G1121200	2,5	1	22	956	977	UCUUUCCUAUCCCUCCCAUUCC	:: ::::: ::::: :::::::	GGCAUGGGUGGGAUCGGAAAGA	Cleavage
mdm-miR482bMIMAT0026022	MD00G1120600	2,5	1	22	601	622	UCUUUCCUAUCCCUCCCAUUCC	:: ::::: ::::: :::::::	GGCAUGGGUGGGAUCGGAAAGA	Cleavage
mdm-miR482bMIMAT0026022	MD11G1078100	2,5	1	22	601	622	UCUUUCCUAUCCCUCCCAUUCC	:: ::::: ::::: :::::::	GGCAUGGGUGGGAUCGGAAAGA	Cleavage
mdm-miR482bMIMAT0026022	MD11G1077700	2,5	1	22	931	952	UCUUUCCUAUCCCUCCCAUUCC	:: ::::: ::::: :::::::	GGCAUGGGUGGGAUCGGAAAGA	Cleavage
mdm-miR482bMIMAT0026022	MD11G1077200	2,5	1	22	591	612	UCUUUCCUAUCCCUCCCAUUCC	:: ::::: ::::: :::::::	GGCAUGGGUGGGAUCGGAAAGA	Cleavage
mdm-miR482bMIMAT0026022	MD07G1150400	2,5	1	22	1055	1076	UCUUUCCUAUCCCUCCCAUUCC	::: .:::::::::::::	UCUCUGGUGGGGAUAGGAAAGA	Cleavage
mdm-miR482bMIMAT0026022	MD01G1082000	2,5	1	22	1190	1211	UCUUUCCUAUCCCUCCCAUUCC	::: .:::::::::::::	UCUCUGGCGGGGAUAGGAAAGA	Cleavage
mdm-miR482bMIMAT0026022	MD11G1077900	2,5	1	19	1	19	UCUUUCCUAUCCCUCCCAU	::::: ::::: :::::::	AUGGGUGGGAUCGGAAAGA	Cleavage
mdm-miR482cMIMAT0026023	MD03G1034100	2,5	1	22	185	206	UCUUUCCUAACCCUCCCAUUCC	::::::: :::: :::::::::	GGAAUGGAAGGGAUAGGAAAGA	Translation
mdm-miR482cMIMAT0026023	MD03G1034300	2,5	1	22	2539	2560	UCUUUCCUAACCCUCCCAUUCC	::::::: :::: :::::::::	GGAAUGGAAGGGGUAGGAAAGA	Translation
mdm-miR482cMIMAT0026023	MD04G1238000	2,5	1	22	791	812	UCUUUCCUAACCCUCCCAUUCC	::.:::::::: ::.::.::::	GGGAUGGGAGGUUUGGGGAAGA	Translation
mdm-miR482cMIMAT0026023	MD01G1197400	2,5	1	22	1178	1199	UCUUUCCUAACCCUCCCAUUCC	: ::: ::::::.:::::::	AUAUUGGAAGGGUUGGGAAAGA	Cleavage
mdm-miR5225cMIMAT0026052	MD05G1230100	2,5	1	22	290	311	UCUGUCGUGGGUGAGAUGGUGC	:.:::::::.:::..:::::	CCGCCAUCUCGCCCGUGACAGC	Cleavage
mdm-miR5225cMIMAT0026052	MD06G1002400	2,5	1	22	1460	1481	UCUGUCGUGGGUGAGAUGGUGC	::.::::::.::: :::::	AUCCCGUCUCACUCACAACAGA	Cleavage
mdm-miR7121eMIMAT0026044	MD09G1223600	2,5	1	21	1251	1271	UCCUCUUGGUGAUCGCCCUGC	.: :: :::::::::::::	AAGGUGCCAUCACCAAGAGGA	Cleavage
mdm-miR7125MIMAT0026059	MD10G1227800	2,5	1	21	139	159	CGAACUUAUUGCAACUAGCUU	:::::: ::::.::::::::	AAGCUACUUGCGAUAAGUUCA	Cleavage
mdm-miR858MIMAT0026070	MD08G1070900	2,5	1	21	289	309	UUCGUUGUCUGUUCGACCUGA	::::::: ::::::::.::.	CCAGGUCGUACAGACAAUGAG	Cleavage
mdm-miR858MIMAT0026070	MD15G1302300	2,5	1	21	292	312	UUCGUUGUCUGUUCGACCUGA	:::: :::::.::::::::	CCAGGGCGAACGGACAACGAU	Cleavage
mdm-miR858MIMAT0026070	MD02G1191000	2,5	1	21	312	332	UUCGUUGUCUGUUCGACCUGA	:::: :::::.::::::::	CCAGGGCGAACGGACAACGAU	Cleavage
mdm-miR858MIMAT0026070	MD15G1215400	2,5	1	21	289	309	UUCGUUGUCUGUUCGACCUGA	:.:: :::::::::::.::.	CCGGGGCGAACAGACAAUGAG	Cleavage
mdm-miR858MIMAT0026070	MD01G1031700	2,5	1	21	237	257	UUCGUUGUCUGUUCGACCUGA	: :::::.::.:::::.:::	CCCGGUCGGACGGACAAUGAA	Cleavage
mdm-miR858MIMAT0026070	MD16G1028800	2,5	1	21	954	974	UUCGUUGUCUGUUCGACCUGA	.:::::::: :::::.:::.	AUAGGUCGAAGAGACAGCGAG	Translation
mdm-miR858MIMAT0026070	MD15G1323500	2,5	1	21	328	348	UUCGUUGUCUGUUCGACCUGA	: :::::.::.:::::.:::	CCCGGUCGGACGGACAAUGAA	Cleavage
mdm-miR858MIMAT0026070	MD14G1012300	2,5	1	21	1808	1828	UUCGUUGUCUGUUCGACCUGA	: .::::::::: :.::::::	UGGGGUCGAACAAAUAACGAA	Cleavage
mdm-miR858MIMAT0026070	MD16G1119800	2,5	1	21	323	343	UUCGUUGUCUGUUCGACCUGA	.:::.:..:::::.:::::	GAGGGUUGGGCAGACGACGAA	Cleavage
mdm-miR858MIMAT0026070	MD07G1277000	2,5	1	21	1493	1513	UUCGUUGUCUGUUCGACCUGA	::::.::::: ::::::.:	GGAGGUUGAACAAACAACGGA	Cleavage
mdm-miR858MIMAT0026070	MD04G1229400	2,5	1	21	103	123	UUCGUUGUCUGUUCGACCUGA	:::: :.::::::::::::	CCAGGCAGGACAGACAACGAA	Cleavage
mdm-miR858MIMAT0026070	MD15G1215100	2,5	1	21	375	395	UUCGUUGUCUGUUCGACCUGA	: :::: :::::::::.:::	CCCGGUCAAACAGACAAUGAA	Cleavage
mdm-miR858MIMAT0026070	MD11G1216000	2,5	1	21	379	399	UUCGUUGUCUGUUCGACCUGA	: :: ::::::::::::::.	CCUGGACGAACAGACAACGAG	Cleavage
mes-miR319h	MD07G1085000	2,5	1	21	1661	1681	CUUGGACUGAAGGGAGCUCCU	::::::::::::: :::::	CGGAGCUCCCUUCACUCCAAU	Cleavage
mes-miR319h	MD02G1269700	2,5	1	21	1759	1779	CUUGGACUGAAGGGAGCUCCU	::::::::::::: :::::	UGGAGCUCCCUUCACUCCAAU	Cleavage
mes-miR319h	MD15G1151800	2,5	1	21	561	581	CUUGGACUGAAGGGAGCUCCU	:.:::.::::::::.:::	UCGGGCUUCCUUCAGUUCAAA	Cleavage
mes-miR319h	MD04G1069600	2,5	1	21	1166	1186	CUUGGACUGAAGGGAGCUCCU	::: :.::::::::::::	UCAAGCACUCUUCAGUCCAAG	Cleavage
mtr-miR4414a-5p	MD12G1100900	2,5	1	21	175	195	AGCUGCUGACUCGUUGGUUCA	::::::::::::: ..:::	ACAACCAACGAGUCAAUGGCU	Cleavage
mtr-miR4414a-5p	MD04G1207400	2,5	1	21	314	334	AGCUGCUGACUCGUUGGUUCA	:::::::::::::::. .:	GAAACCAACGAGUCAGCGAUU	Cleavage
peu-miR2910	MD13G1103700	2,5	1	21	175	195	UAGUUGGUGGAGCGAUUUGUC	::::::: :::::::::::	CACAAAUCUCUCCACCAACUC	Cleavage
peu-miR2910	MD13G1104100	2,5	1	21	175	195	UAGUUGGUGGAGCGAUUUGUC	::::::: :::::::::::	CACAAAUCUCUCCACCAACUC	Cleavage
peu-miR2910	MD09G1069300	2,5	1	21	881	901	UAGUUGGUGGAGCGAUUUGUC	:..: :::::::.:::::.::	GGUACAUCGCUCUACCAAUUA	Cleavage
peu-miR2910	MD10G1216700	2,5	1	21	903	923	UAGUUGGUGGAGCGAUUUGUC	:::::.:::::.::: :::	UUCAAAUUGCUCCGCCAUCUA	Cleavage
peu-miR2910	MD05G1238400	2,5	1	21	973	993	UAGUUGGUGGAGCGAUUUGUC	:::::.:::::.::: :::	UUCAAAUUGCUCCGCCAUCUA	Cleavage
peu-miR2910	MD02G1109000	2,5	1	21	2008	2028	UAGUUGGUGGAGCGAUUUGUC	.::::::.::::...::::	UCUAAAUCGUUCCAUUGACUA	Cleavage
ppe-miR858	MD09G1183800	2,5	1	21	596	616	CUCGUUGUCUGUUCGACCUUG	: .:::::::::::.::.::	CCGGGUCGAACAGAUAAUGAA	Cleavage
ppe-miR858	MD04G1060200	2,5	1	21	358	378	CUCGUUGUCUGUUCGACCUUG	: ::: :::::::::::.::	CCAGGCCGAACAGACAAUGAA	Cleavage
ppe-miR858	MD06G1053100	2,5	1	21	343	363	CUCGUUGUCUGUUCGACCUUG	: ::: :::::::::::.::	CCAGGCCGAACAGACAAUGAA	Cleavage
ppe-miR858	MD15G1051000	2,5	1	21	331	351	CUCGUUGUCUGUUCGACCUUG	: ::: :::::::::::.::	CCAGGACGAACAGACAAUGAA	Cleavage
ppe-miR858	MD15G1302300	2,5	1	21	292	312	CUCGUUGUCUGUUCGACCUUG	: ::: :::::.::::::::	CCAGGGCGAACGGACAACGAU	Cleavage
ppe-miR858	MD02G1191000	2,5	1	21	312	332	CUCGUUGUCUGUUCGACCUUG	: ::: :::::.::::::::	CCAGGGCGAACGGACAACGAU	Cleavage
ppe-miR858	MD15G1215500	2,5	1	21	379	399	CUCGUUGUCUGUUCGACCUUG	: ::: :::::::::::.::	CCAGGGCGAACAGACAAUGAA	Cleavage
ppe-miR858	MD09G1184000	2,5	1	21	403	423	CUCGUUGUCUGUUCGACCUUG	: ::: :::::::::::.::	CCAGGCCGAACAGACAAUGAA	Cleavage
ppe-miR858	MD02G1087900	2,5	1	21	393	413	CUCGUUGUCUGUUCGACCUUG	: ::: :::::::::::.::	CCAGGGCGAACAGACAAUGAA	Cleavage
ppe-miR858	MD17G1279200	2,5	1	21	362	382	CUCGUUGUCUGUUCGACCUUG	::: ::::::::::.:::	CCUGGUAGAACAGACAAUGAG	Cleavage
ppe-miR858	MD09G1286900	2,5	1	21	355	375	CUCGUUGUCUGUUCGACCUUG	::: ::::::::::.:::	CCCGGUAGAACAGACAAUGAG	Cleavage
ppe-miR858	MD10G1205400	2,5	1	21	298	318	CUCGUUGUCUGUUCGACCUUG	: .:: :::::.:::::.:::	CCGGGACGAACGGACAAUGAG	Cleavage
ppe-miR858	MD11G1215600	2,5	1	21	379	399	CUCGUUGUCUGUUCGACCUUG	:: :::::.:::::::::	CCUGGACGAACGGACAACGAG	Cleavage
ppe-miR858	MD09G1073600	2,5	1	21	298	318	CUCGUUGUCUGUUCGACCUUG	: ::: ::::::::::.:::	CCAGGGAGAACAGACAAUGAG	Cleavage
ppe-miR858	MD06G1089700	2,5	1	21	240	260	CUCGUUGUCUGUUCGACCUUG	: .:: ::::::::::::::	CCGGGAAGAACAGACAACGAG	Cleavage
ppe-miR858	MD16G1158800	2,5	1	21	361	381	CUCGUUGUCUGUUCGACCUUG	: ::: ::::::::::.:::	CCAGGAAGAACAGACAAUGAG	Cleavage
ppe-miR858	MD14G1172900	2,5	1	21	536	556	CUCGUUGUCUGUUCGACCUUG	: ::: ::::::::::.:::	CCAGGAAGAACAGACAAUGAG	Cleavage
ppe-miR858	MD12G1198600	2,5	1	21	480	500	CUCGUUGUCUGUUCGACCUUG	: ::: ::::::::::.:::	CCAGGAAGAACAGACAAUGAG	Cleavage
ppe-miR858	MD04G1184900	2,5	1	21	726	746	CUCGUUGUCUGUUCGACCUUG	: ::: ::::::::::.:::	CCAGGAAGAACAGACAAUGAG	Cleavage
ptc-miR159d	MD02G1242500	2,5	1	21	1643	1663	CUUGGAUUGAAGGGAGCUCCU	:::: ::.:.::::.::::::	AGGAACUUCUUUCAGUCCAAG	Cleavage
ptc-miR159d	MD07G1074000	2,5	1	21	1737	1757	CUUGGAUUGAAGGGAGCUCCU	:::: ::.:.::::.::::::	AGGAACUUCUUUCAGUCCAAG	Cleavage
ptc-miR159d	MD07G1085000	2,5	1	21	1661	1681	CUUGGAUUGAAGGGAGCUCCU	::::::::::::: :::::	CGGAGCUCCCUUCACUCCAAU	Cleavage
ptc-miR159d	MD02G1269700	2,5	1	21	1759	1779	CUUGGAUUGAAGGGAGCUCCU	::::::::::::: :::::	UGGAGCUCCCUUCACUCCAAU	Cleavage
ptc-miR159d	MD04G1177800	2,5	1	21	1294	1314	CUUGGAUUGAAGGGAGCUCCU	: : :::::::::::.::::	UGUAUCUCCCUUCAAUUCAAG	Cleavage
ptc-miR159d	MD02G1259600	2,5	1	21	1304	1324	CUUGGAUUGAAGGGAGCUCCU	: :.:: :::::::::..:::	AAGGGCACCCUUCAAUUUAAG	Cleavage
ptc-miR159d	MD17G1084700	2,5	1	21	1954	1974	CUUGGAUUGAAGGGAGCUCCU	: :.:.::::::::.::::	UUGCGUUUCCUUCAAUUCAAG	Cleavage
sit-miR05-npr	MD14G1021600	2,5	1	21	425	445	UUUCGGACCAGGCUUCAUUCC	:.::::::..:::::.::.:	UGGAUGAAGUUUGGUCUGAGA	Cleavage
sit-miR05-npr	MD14G1017300	2,5	1	21	864	884	UUUCGGACCAGGCUUCAUUCC	: :.:: .:.:::::::::::	GCAGUGCGGUCUGGUCCGAAA	Cleavage
sit-miR05-npr	MD04G1172900	2,5	1	21	960	979	UUUCGGACCAGGCUUCAUUCC	::::: :::::::::::.:	UAAAUGA-GCCUGGUCCGAGA	Cleavage
t00205877_x43290	MD05G1137900	2,5	1	24	2540	2563	ACGGUGAUAAAUAGGGUAGUGAGC	::::: :.:.:::::::::.:::	ACUCACCAUCUUAUUUAUCAUCGU	Cleavage
t00370463_x599	MD17G1026100	2,5	1	24	881	904	AUCCCGUGAUCGUGACCGUUCAUC	::::: :.::::..:::::	UGAUCACGGUGAUGAUCGUGGGAU	Cleavage
t00969484_x10829	MD15G1380100	2,5	1	24	212	235	GUGUCUGAGAGGUAAAAAGGGGUG	::.::::::::::.::::: :::.	CAUCCCUUUUUACUUCUCACACAU	Cleavage
t00969484_x10829	MD12G1217000	2,5	1	24	254	277	GUGUCUGAGAGGUAAAAAGGGGUG	:: .:.::::::.::.:::::.:.	CAAUCUUUUUUAUCUUUCAGAUAU	Cleavage
t00969484_x10829	MD05G1294000	2,5	1	24	2009	2032	GUGUCUGAGAGGUAAAAAGGGGUG	:..::::::...:::.:::::.	UUCUUCUUUUUGUUUCUUAGACAU	Cleavage
t00969484_x10829	MD07G1112800	2,5	1	24	771	794	GUGUCUGAGAGGUAAAAAGGGGUG	:. :.:::: ::::::::::::.	CGACUCUUUCAACCUCUCAGACAU	Cleavage
t00969484_x10829	MD13G1157700	2,5	1	24	1786	1809	GUGUCUGAGAGGUAAAAAGGGGUG	::::::::::::.: :::.	UUUGACUUUUUACCUCUUAAACAU	Cleavage
t01163329_x11463	MD11G1259900	2,5	1	24	2386	2409	GUUUUUGAAUGAAAGGCUCAUGUG	.:::. .::::::::.::::::	GUUAUGGUUCUUUCAUUUAAAAAC	Cleavage
t01163329_x11463	MD01G1121700	2,5	1	24	428	450	GUUUUUGAAUGAAAGGCUCAUGUG	:::: ::::.::::.: :::::::	CACA-GAGCUUUUCGUCCAAAAAC	Cleavage
t01163329_x11463	MD14G1235300	2,5	1	24	151	173	GUUUUUGAAUGAAAGGCUCAUGUG	::.: ::::.:::..::::.::.:	CAUA-GAGCUUUUUGUUCAGAAGC	Cleavage
t01163329_x11463	MD06G1230700	2,5	1	24	167	189	GUUUUUGAAUGAAAGGCUCAUGUG	::.: ::::.:::.:::::..:.:	CAUA-GAGCUUUUUAUUCAGGAGC	Cleavage
t01163329_x11463	MD08G1249500	2,5	1	24	4867	4890	GUUUUUGAAUGAAAGGCUCAUGUG	:::: ::::::::::::.	CCCGACAGCCGUUCAUUCAAAAAU	Cleavage
t01163329_x11463	MD05G1201000	2,5	1	24	1285	1308	GUUUUUGAAUGAAAGGCUCAUGUG	:::. :::::::::::.:.	AGCUGGAGUAUUUCAUUCAAAGAU	Cleavage
t01163329_x11463	MD11G1221900	2,5	1	24	2866	2889	GUUUUUGAAUGAAAGGCUCAUGUG	::: .::::::::::..::	UGGUGGAGAUUUUCAUUCAAGGAC	Cleavage
t03063567_x79	MD13G1241100	2,5	1	21	665	685	AGCUGCCGACUCAUUCAUUCA	::::::::. :.:::::::	AAAAUGAAUGGCUUGGCAGCU	Translation
t05229383_x4081	MD07G1160100	2,5	1	21	463	483	CUUGCAUAUCUCAGGAGCUGC	:.::.:::::.:::::::.:	GUAGUUCCUGGGAUAUGCGAA	Cleavage
t05229383_x4081	MD08G1145200	2,5	1	21	422	442	CUUGCAUAUCUCAGGAGCUGC	:::::::: .:::::::.::	UCAGCUCCUCGGAUAUGCGAG	Cleavage
t06991240_x100	MD04G1021200	2,5	1	24	1128	1151	AAGUGAGUUUUGUGUGGAUGUUUC	::.. :::: ::::::.::::::	UAAGUCUCCAGACAAAAUUCACUU	Cleavage
t06991240_x100	MD10G1005500	2,5	1	24	1574	1597	AAGUGAGUUUUGUGUGGAUGUUUC	::.. :::: ::::::.::::::	CAAGUCUCCAGACAAAAUUCACUU	Cleavage
t06991240_x100	MD10G1301100	2,5	1	24	8	31	AAGUGAGUUUUGUGUGGAUGUUUC	: ::::::::::::: ::::	UCCAAAUCCACACAAAACACACUC	Cleavage
t06991240_x100	MD05G1358600	2,5	1	24	918	941	AAGUGAGUUUUGUGUGGAUGUUUC	.:::.. :::::.:::::::	UGCUUAUCUGGACAAAGCUCACUU	Cleavage
t07833554_x78	MD05G1228900	2,5	1	22	188	209	UCCUCAUUCUUCGUCUUCCUUC	.: ::::: ::::::::::::	AGAAGAAGAAGAAGAAUGAGGA	Cleavage
t07833554_x78	MD10G1067800	2,5	1	22	83	104	UCCUCAUUCUUCGUCUUCCUUC	: .:::::: ::::::::.::.	GUGGGAAGAAGAAGAAUGGGGG	Cleavage
t07833554_x78	MD15G1423900	2,5	1	22	847	868	UCCUCAUUCUUCGUCUUCCUUC	: :::::.::::.::::::.	UUAAGAAGAUGAAGGAUGAGGG	Cleavage
t07833554_x78	MD05G1255100	2,5	1	22	554	575	UCCUCAUUCUUCGUCUUCCUUC	.:::::: ::.:::::.:::	UUGGGAAGAGGAGGAAUGGGGA	Cleavage
t07833554_x78	MD17G1067300	2,5	1	22	1760	1781	UCCUCAUUCUUCGUCUUCCUUC	: ::::::.::::.:::: ::	CACGGAAGAUGAAGGAUGAAGA	Cleavage
t08515395_x8579	MD13G1139300	2,5	1	21	409	429	CACUUGCUCCCCUUCUCCAAC	:::::::::::: :::::::	GUUGGAGAAGGGAAGCAAGUC	Cleavage
t08515395_x8579	MD15G1152700	2,5	1	21	272	292	CACUUGCUCCCCUUCUCCAAC	::: :::::::::::::: :	CUUGCAGAAGGGGAGCAAGCG	Cleavage
t08515395_x8579	MD11G1247100	2,5	1	21	1007	1027	CACUUGCUCCCCUUCUCCAAC	: :: ::::::::::::.::	GCUGCAGAAGGGGAGCAGGUU	Cleavage
t10036822_x303	MD01G1106200	2,5	1	21	654	674	AAAUGAGCGGAGUGGAAAGAA	:::::::.:::: .::::::	AUCUUUCCGCUCCUUUCAUUU	Cleavage
t10036822_x303	MD07G1172600	2,5	1	21	707	727	AAAUGAGCGGAGUGGAAAGAA	:::::::.:::: .::::::	AUCUUUCCGCUCCUUUCAUUU	Cleavage
t10036822_x303	MD15G1437700	2,5	1	21	1379	1399	AAAUGAGCGGAGUGGAAAGAA	::::: :::::.:::::::	AUCUUUGCACUCUGCUCAUUA	Cleavage
t10036822_x303	MD15G1261200	2,5	1	21	16	36	AAAUGAGCGGAGUGGAAAGAA	:::::..::: ::::::::	ACCUUUCUGCUCAGCUCAUUU	Cleavage
t10212079_x3461	MD13G1064200	2,5	1	24	1318	1341	GUUUUUGAAUGGAAGACUCAUGUG	::: : :::::::::::::.::	GCCAUUACUCUUCCAUUCAAAGAC	Cleavage
t10212079_x3461	MD13G1064300	2,5	1	24	1420	1443	GUUUUUGAAUGGAAGACUCAUGUG	::: : :::::::::::::.::	GCCAUUACUCUUCCAUUCAAAGAC	Cleavage
t10212079_x3461	MD11G1259900	2,5	1	24	2386	2409	GUUUUUGAAUGGAAGACUCAUGUG	.:::. ::::.::::.::::::	GUUAUGGUUCUUUCAUUUAAAAAC	Cleavage
t10212079_x3461	MD05G1341800	2,5	1	24	1397	1419	GUUUUUGAAUGGAAGACUCAUGUG	::: ::.: ::::.:::::::::.	CAC-UGGGACUUCUAUUCAAAAAU	Cleavage
t10212079_x3461	MD02G1003700	2,5	1	24	582	605	GUUUUUGAAUGGAAGACUCAUGUG	:. :::::.::::.:::::	AUGCAGGCUCUUCUAUUCGAAAAC	Cleavage
t10212079_x3461	MD05G1201000	2,5	1	24	1285	1308	GUUUUUGAAUGGAAGACUCAUGUG	:::: ::.::::::::.:.	AGCUGGAGUAUUUCAUUCAAAGAU	Cleavage
t11329296_x5768	MD02G1038300	2,5	1	21	714	734	UAUAUGGAGGGAAAUAUGGUG	:::::::.:::.:::::.	AUGCAUAUUUUCCUUCAUAUG	Cleavage
t11329296_x5768	MD05G1081400	2,5	1	20	1	20	UAUAUGGAGGGAAAUAUGGU	:::: :::..::.::::::	UCCAUCUUUUUCUUCAUAUA	Cleavage
ath-miR858b	MD06G1098100	3	1	21	2090	2110	UUCGUUGUCUGUUCGACCUUG	:::::::::. .:::::::.:	CAAGGUCGAGGGGACAACGGA	Translation
ath-miR858b	MD05G1318100	3	1	21	369	389	UUCGUUGUCUGUUCGACCUUG	:.::::::.: :::::.::.:	CGAGGUCGGAGAGACAGCGGA	Translation
ath-miR858b	MD01G1174900	3	1	21	460	480	UUCGUUGUCUGUUCGACCUUG	.:: :::::::::...:.:::	UAAUGUCGAACAGGUGAUGAA	Cleavage
ath-miR858b	MD08G1206600	3	1	21	804	824	UUCGUUGUCUGUUCGACCUUG	...:::.::.:::.:.:.:::	UGGGGUUGAGCAGGCGAUGAA	Cleavage
ath-miR858b	MD15G1390100	3	1	21	804	824	UUCGUUGUCUGUUCGACCUUG	...:::.::.:::.:.:.:::	UGGGGUUGAGCAGGCGAUGAA	Cleavage
ath-miR858b	MD10G1184100	3	1	21	468	488	UUCGUUGUCUGUUCGACCUUG	::::: ::::::::.:::	CCUGGUCGCACAGACAAUGAA	Cleavage
ath-miR858b	MD05G1197600	3	1	21	467	487	UUCGUUGUCUGUUCGACCUUG	::::: ::::::::.:::	CCUGGUCGCACAGACAAUGAA	Cleavage
ath-miR858b	MD15G1369700	3	1	21	310	330	UUCGUUGUCUGUUCGACCUUG	: :: :::::.:::::.:::	GACGGCCGAACGGACAAUGAA	Cleavage
ath-miR858b	MD08G1183100	3	1	21	326	346	UUCGUUGUCUGUUCGACCUUG	: :: :::::.:::::.:::	GACGGCCGAACGGACAAUGAA	Cleavage
ath-miR858b	MD05G1105600	3	1	21	2969	2989	UUCGUUGUCUGUUCGACCUUG	::: : ::.:::::::.:::	AAAGAUGGAGCAGACAAUGAA	Cleavage
ath-miR858b	MD17G1279200	3	1	21	362	382	UUCGUUGUCUGUUCGACCUUG	::: ::::::::::.::.	CCUGGUAGAACAGACAAUGAG	Cleavage
ath-miR858b	MD09G1286900	3	1	21	355	375	UUCGUUGUCUGUUCGACCUUG	::: ::::::::::.::.	CCCGGUAGAACAGACAAUGAG	Cleavage
ath-miR858b	MD13G1026400	3	1	21	382	402	UUCGUUGUCUGUUCGACCUUG	: ::: :: ::::::::.:::	CCAGGACGUACAGACAAUGAA	Cleavage
ath-miR858b	MD10G1205400	3	1	21	298	318	UUCGUUGUCUGUUCGACCUUG	: .:: :::::.:::::.::.	CCGGGACGAACGGACAAUGAG	Cleavage
ath-miR858b	MD16G1029400	3	1	21	418	438	UUCGUUGUCUGUUCGACCUUG	: ::: :: ::::::::.:::	CCAGGACGUACAGACAAUGAA	Cleavage
ath-miR858b	MD07G1211300	3	1	21	414	434	UUCGUUGUCUGUUCGACCUUG	: :::: :::::::.:::: :	CCAGGUAGAACAGAUAACGCA	Cleavage
ath-miR858b	MD11G1215600	3	1	21	379	399	UUCGUUGUCUGUUCGACCUUG	:: :::::.::::::::.	CCUGGACGAACGGACAACGAG	Cleavage
ath-miR858b	MD00G1065700	3	1	21	383	403	UUCGUUGUCUGUUCGACCUUG	: ::: :.::::::::.:::	CCAGGAAGGACAGACAAUGAA	Cleavage
ath-miR858b	MD16G1271400	3	1	21	379	399	UUCGUUGUCUGUUCGACCUUG	: ::: ::::.::.::::::	CCAGGGAGAACGGAUAACGAA	Cleavage
ath-miR858b	MD09G1073600	3	1	21	298	318	UUCGUUGUCUGUUCGACCUUG	: ::: ::::::::::.::.	CCAGGGAGAACAGACAAUGAG	Cleavage
ath-miR858b	MD06G1089700	3	1	21	240	260	UUCGUUGUCUGUUCGACCUUG	: .:: :::::::::::::.	CCGGGAAGAACAGACAACGAG	Cleavage
ath-miR858b	MD09G1191100	3	1	21	367	387	UUCGUUGUCUGUUCGACCUUG	: ::: :::::::.::.:::	CCAGGAAGAACAGAUAAUGAA	Cleavage
ath-miR858b	MD14G1227500	3	1	21	363	383	UUCGUUGUCUGUUCGACCUUG	: .:: ::::::::::.:::	CCGGGAAGAACAGACAAUGAA	Cleavage
ath-miR858b	MD16G1158800	3	1	21	361	381	UUCGUUGUCUGUUCGACCUUG	: ::: ::::::::::.::.	CCAGGAAGAACAGACAAUGAG	Cleavage
ath-miR858b	MD17G1173700	3	1	21	373	393	UUCGUUGUCUGUUCGACCUUG	: ::: :::::::.::.:::	CCAGGAAGAACAGAUAAUGAA	Cleavage
ath-miR858b	MD17G1086000	3	1	21	382	402	UUCGUUGUCUGUUCGACCUUG	: ::: :.::::::::.:::	CCAGGAAGGACAGACAAUGAA	Cleavage
ath-miR858b	MD14G1172900	3	1	21	536	556	UUCGUUGUCUGUUCGACCUUG	: ::: ::::::::::.::.	CCAGGAAGAACAGACAAUGAG	Cleavage
ath-miR858b	MD06G1217200	3	1	21	600	620	UUCGUUGUCUGUUCGACCUUG	: .:: ::::::::::.:::	CCGGGAAGAACAGACAAUGAA	Cleavage
ath-miR858b	MD12G1198600	3	1	21	480	500	UUCGUUGUCUGUUCGACCUUG	: ::: ::::::::::.::.	CCAGGAAGAACAGACAAUGAG	Cleavage
ath-miR858b	MD04G1184900	3	1	21	726	746	UUCGUUGUCUGUUCGACCUUG	: ::: ::::::::::.::.	CCAGGAAGAACAGACAAUGAG	Cleavage
bdi-miR159a-3p	MD01G1178100	3	1	20	110	129	CUUGGAUUGAAGGGAGCUCU	.::::::: :::.::::::	GGAGCUCCAUUCGAUCCAAA	Cleavage
bdi-miR159a-3p	MD14G1210400	3	1	20	400	419	CUUGGAUUGAAGGGAGCUCU	.:::::::. :.:::.::::	GGAGCUCCUGUUAAUUCAAG	Translation
bdi-miR159a-3p	MD06G1200700	3	1	20	531	550	CUUGGAUUGAAGGGAGCUCU	.:::::::. :.:::.::::	GGAGCUCCUGUUAAUUCAAG	Translation
bdi-miR159a-3p	MD15G1151800	3	1	20	562	581	CUUGGAUUGAAGGGAGCUCU	:.:::.::::::.:.:::	CGGGCUUCCUUCAGUUCAAA	Cleavage
bdi-miR159a-3p	MD05G1018900	3	1	20	3682	3701	CUUGGAUUGAAGGGAGCUCU	:::::.:.:::::: .:::	UGAGCUUCUUUCAAUGUAAG	Cleavage
bdi-miR159a-3p	MD00G1007700	3	1	20	470	489	CUUGGAUUGAAGGGAGCUCU	.:::: .::: :::::::::	GGAGCAUCCUACAAUCCAAG	Translation
bdi-miR159a-3p	MD12G1193400	3	1	20	1235	1254	CUUGGAUUGAAGGGAGCUCU	: ::::.::::::.::::	GUAUCUCCUUUCAAUUCAAG	Cleavage
bdi-miR159a-3p	MD04G1069600	3	1	20	1167	1186	CUUGGAUUGAAGGGAGCUCU	::: :.:::::.::::::	CAAGCACUCUUCAGUCCAAG	Cleavage
bdi-miR159a-3p	MD11G1267200	3	1	20	658	677	CUUGGAUUGAAGGGAGCUCU	: :::.::: :::::::::	UGUGCUUCCUACAAUCCAAG	Translation
bdi-miR159a-3p	MD02G1084600	3	1	20	266	285	CUUGGAUUGAAGGGAGCUCU	:::.: ::::..:::::.:	UGAGUUGCCUUUGAUCCAGG	Cleavage
bdi-miR393a	MD04G1008100	3	1	21	556	576	UCCAAAGGGAUCGCAUUGAUC	:::.:::.:.:..::::::.	UAUCGAUGUGGUUUCUUUGGG	Cleavage
bdi-miR393a	MD12G1198800	3	1	21	1626	1646	UCCAAAGGGAUCGCAUUGAUC	:: :::: .:::.::::::::	GAGCAAUAUGAUUCCUUUGGA	Cleavage
bdi-miR393a	MD00G1001900	3	1	21	722	742	UCCAAAGGGAUCGCAUUGAUC	:::.: ::::::::::: ::	AAUCGAGGCGAUCCCUUUAGA	Cleavage
bdi-miR393a	MD08G1248600	3	1	21	2987	3007	UCCAAAGGGAUCGCAUUGAUC	: :.:: :.::::.::::::.	GCUUAAGGUGAUCUCUUUGGG	Cleavage
cpa-miR319	MD02G1242500	3	1	20	1644	1663	AUUGGACUGAAGGGAGCUCC	::: ::.:.::::::::::	GGAACUUCUUUCAGUCCAAG	Cleavage
cpa-miR319	MD07G1074000	3	1	20	1738	1757	AUUGGACUGAAGGGAGCUCC	::: ::.:.::::::::::	GGAACUUCUUUCAGUCCAAG	Cleavage
cpa-miR319	MD00G1058000	3	1	20	1533	1552	AUUGGACUGAAGGGAGCUCC	:::.:.:::: :::.::::	CGAGUUUCCUUGAGUUCAAU	Cleavage
cpa-miR319	MD03G1239100	3	1	20	1345	1364	AUUGGACUGAAGGGAGCUCC	::.: ::::::::::::.:	GGGGACCCCUUCAGUCCAGU	Cleavage
cpa-miR319	MD11G1258900	3	1	20	1913	1932	AUUGGACUGAAGGGAGCUCC	::.: ::::::::::::.:	GGGGACCCCUUCAGUCCAGU	Cleavage
cpa-miR319	MD16G1007600	3	1	20	724	743	AUUGGACUGAAGGGAGCUCC	:: .: :::::::::::.:	CGAUUUGCCUUCAGUCCAGU	Cleavage
hbr-miR166a	MD14G1021600	3	1	19	425	443	UCGGACCAGGCUUCAUUCC	:.::::::..:::::.::	UGGAUGAAGUUUGGUCUGA	Cleavage
hbr-miR166a	MD02G1212500	3	1	19	1984	2002	UCGGACCAGGCUUCAUUCC	::::::::::::: : :::	GGAAUGAAGCCUGAUGCGA	Cleavage
hbr-miR166a	MD17G1275500	3	1	19	115	133	UCGGACCAGGCUUCAUUCC	: ::: ::::.:::::::.	GAAAUCAAGCUUGGUCCGG	Cleavage
lus-miR167a	MD15G1082200	3	1	21	271	291	UGAAGCUGCCAGCAUGAUCUC	.::::. :.::::.:::::.	CGGAUCGGGUUGGCGGCUUCG	Cleavage
lus-miR167a	MD16G1139300	3	1	21	4289	4309	UGAAGCUGCCAGCAUGAUCUC	: :::. ::::::.::::::	GUGAUUUUGCUGGUAGCUUCU	Cleavage
lus-miR167a	MD12G1235500	3	1	21	1062	1082	UGAAGCUGCCAGCAUGAUCUC	::: ::.:::.:::::::	GCCAUCUUGUUGGUAGCUUCA	Cleavage
mdm-miR159aMIMAT0025898	MD01G1178100	3	1	20	110	129	CUUGGAUUGAAGGGAGCUCC	:::::::: :::.::::::	GGAGCUCCAUUCGAUCCAAA	Cleavage
mdm-miR159aMIMAT0025898	MD14G1210400	3	1	20	400	419	CUUGGAUUGAAGGGAGCUCC	::::::::. :.:::.::::	GGAGCUCCUGUUAAUUCAAG	Translation
mdm-miR159aMIMAT0025898	MD06G1200700	3	1	20	531	550	CUUGGAUUGAAGGGAGCUCC	::::::::. :.:::.::::	GGAGCUCCUGUUAAUUCAAG	Translation
mdm-miR159aMIMAT0025898	MD00G1007700	3	1	20	470	489	CUUGGAUUGAAGGGAGCUCC	::::: .::: :::::::::	GGAGCAUCCUACAAUCCAAG	Translation
mdm-miR159aMIMAT0025898	MD15G1151800	3	1	20	562	581	CUUGGAUUGAAGGGAGCUCC	:.:::.::::::.:.:::	CGGGCUUCCUUCAGUUCAAA	Cleavage
mdm-miR159aMIMAT0025898	MD05G1018900	3	1	20	3682	3701	CUUGGAUUGAAGGGAGCUCC	:::::.:.:::::: .:::	UGAGCUUCUUUCAAUGUAAG	Cleavage
mdm-miR159aMIMAT0025898	MD12G1193400	3	1	20	1235	1254	CUUGGAUUGAAGGGAGCUCC	: : ::::.::::::.::::	GUAUCUCCUUUCAAUUCAAG	Cleavage
mdm-miR159aMIMAT0025898	MD04G1069600	3	1	20	1167	1186	CUUGGAUUGAAGGGAGCUCC	::: :.:::::.::::::	CAAGCACUCUUCAGUCCAAG	Cleavage
mdm-miR159aMIMAT0025898	MD11G1267200	3	1	20	658	677	CUUGGAUUGAAGGGAGCUCC	: :::.::: :::::::::	UGUGCUUCCUACAAUCCAAG	Translation
mdm-miR159aMIMAT0025898	MD02G1084600	3	1	20	266	285	CUUGGAUUGAAGGGAGCUCC	:::.: ::::..:::::.:	UGAGUUGCCUUUGAUCCAGG	Cleavage
mdm-miR164cMIMAT0025909	MD00G1093600	3	1	21	195	215	UGGAGAAGCAGGGCACGUGCA	::: :::::::::: ::.::	CGCAAGUGCCCUGCUACUUCA	Cleavage
mdm-miR164cMIMAT0025909	MD10G1197800	3	1	21	82	102	UGGAGAAGCAGGGCACGUGCA	: :.. :::.::::::::.::	UCCGUUUGCUCUGCUUCUUCA	Cleavage
mdm-miR164cMIMAT0025909	MD10G1270900	3	1	21	290	310	UGGAGAAGCAGGGCACGUGCA	: ::::::::.::::.::	CAAAGGUGCCCUGUUUCUUCA	Cleavage
mdm-miR164cMIMAT0025909	MD10G1270700	3	1	21	468	488	UGGAGAAGCAGGGCACGUGCA	:: :::::.::.::.:.::	CACAAGUGCCUUGUUUUUUCA	Cleavage
mdm-miR164cMIMAT0025909	MD05G1085700	3	1	21	121	141	UGGAGAAGCAGGGCACGUGCA	.:. :::::::.:::::.:	CAUAUUUGCCCUGUUUCUCUA	Cleavage
mdm-miR164cMIMAT0025909	MD11G1080800	3	1	21	747	767	UGGAGAAGCAGGGCACGUGCA	: : : :::.:::.:::::::	UUCUCUUGCUCUGUUUCUCCA	Cleavage
mdm-miR164cMIMAT0025909	MD08G1182700	3	1	21	880	900	UGGAGAAGCAGGGCACGUGCA	:: :::.::::::::::.	AACAAUUGCUCUGCUUCUCCG	Cleavage
mdm-miR164cMIMAT0025909	MD00G1142400	3	1	21	785	805	UGGAGAAGCAGGGCACGUGCA	::: : ..:::::::::::	AACACUUCUUCUGCUUCUCCA	Cleavage
mdm-miR164cMIMAT0025909	MD17G1235600	3	1	21	94	114	UGGAGAAGCAGGGCACGUGCA	::: : ::.:::::::::.	ACCACAUCCCUUGCUUCUCCG	Cleavage
mdm-miR164cMIMAT0025909	MD02G1088800	3	1	21	602	622	UGGAGAAGCAGGGCACGUGCA	::: : ..:::::::::::	AACACUUCUUCUGCUUCUCCA	Cleavage
mdm-miR171bMIMAT0025939	MD14G1197800	3	1	21	51	71	UUGAGCCGCGUCAAUAUCUCC	::::: ::::::.:: ::::	UGAGAUUUUGACGUGGAUCAA	Cleavage
mdm-miR171bMIMAT0025939	MD00G1186200	3	1	21	362	382	UUGAGCCGCGUCAAUAUCUCC	::::: ::::::.:: ::::	UGAGAUUUUGACGUGGAUCAA	Cleavage
mdm-miR171bMIMAT0025939	MD06G1191400	3	1	21	324	344	UUGAGCCGCGUCAAUAUCUCC	::::: ::::::.:: ::::	UGAGAUUUUGACGUGGAUCAA	Cleavage
mdm-miR171bMIMAT0025939	MD10G1221600	3	1	21	1452	1472	UUGAGCCGCGUCAAUAUCUCC	: :::::::: ::: ::::::	GAAGAUAUUGUCGCAGCUCAA	Translation
mdm-miR171bMIMAT0025939	MD10G1223100	3	1	21	1725	1745	UUGAGCCGCGUCAAUAUCUCC	: :::::::: ::: ::::::	GAAGAUAUUGUCGCAGCUCAA	Translation
mdm-miR171bMIMAT0025939	MD14G1067400	3	1	21	3001	3021	UUGAGCCGCGUCAAUAUCUCC	::::.::::.:.:::: ::	UAAGAUGUUGAUGUGGCUAAA	Cleavage
mdm-miR171bMIMAT0025939	MD01G1214500	3	1	21	703	723	UUGAGCCGCGUCAAUAUCUCC	: ::: .:::::: :::::::	GAAGAAGUUGACGAGGCUCAA	Cleavage
mdm-miR171bMIMAT0025939	MD09G1139300	3	1	21	517	537	UUGAGCCGCGUCAAUAUCUCC	: :: :.:::: :::::::::	GAAGCUGUUGAAGCGGCUCAA	Translation
mdm-miR171bMIMAT0025939	MD16G1175200	3	1	21	912	932	UUGAGCCGCGUCAAUAUCUCC	: ::.::::::.::.:.::	UAAAAUGUUGACGUGGUUUAA	Cleavage
mdm-miR171bMIMAT0025939	MD17G1236400	3	1	21	70	90	UUGAGCCGCGUCAAUAUCUCC	: ::.::::::.::.:.::	UAAAAUGUUGACGUGGUUUAA	Cleavage
mdm-miR171bMIMAT0025939	MD10G1100300	3	1	21	611	630	UUGAGCCGCGUCAAUAUCUCC	::: .::::::.:::::::	CUAGA-GUUGACGUGGCUCAA	Cleavage
mdm-miR3627bMIMAT0026017	MD01G1056200	3	1	20	1235	1254	UCGCAGGAGAGAUGGCACUA	:.:::::.::::: :::.::	UGGUGCCGUCUCUACUGUGA	Cleavage
mdm-miR3627bMIMAT0026017	MD15G1115200	3	1	20	288	307	UCGCAGGAGAGAUGGCACUA	:::::::: :::.:::.:.	AAGUGCCAUAUCUUCUGUGG	Translation
mdm-miR3627bMIMAT0026017	MD15G1046200	3	1	20	609	628	UCGCAGGAGAGAUGGCACUA	::::.:::.::::: :::.	GAGUGUCAUUUCUCCGGCGG	Cleavage
mdm-miR3627bMIMAT0026017	MD02G1212500	3	1	20	637	656	UCGCAGGAGAGAUGGCACUA	:: :::::::.:::::: :	CAGGGCCAUCUUUCCUGCCA	Cleavage
mdm-miR3627bMIMAT0026017	MD17G1138600	3	1	20	1880	1899	UCGCAGGAGAGAUGGCACUA	::::: .:.:::.:::.::	CAGUGCAGUUUCUUCUGUGA	Cleavage
mdm-miR3627bMIMAT0026017	MD08G1136000	3	1	20	203	222	UCGCAGGAGAGAUGGCACUA	: :: .:::::::.:::::	CAUUGGUAUCUCUCUUGCGA	Cleavage
mdm-miR390eMIMAT0025973	MD16G1148700	3	1	21	481	501	AAGCUCAGGAGGGAUAGCGCC	::::::::::::::::	UUGUCUAUCCCUCCUGAGCUG	Cleavage
mdm-miR390eMIMAT0025973	MD11G1251700	3	1	21	3338	3358	AAGCUCAGGAGGGAUAGCGCC	::.:.:.:.:.::.:::::::	GGUGUUGUUCUUCUUGAGCUU	Cleavage
mdm-miR390eMIMAT0025973	MD03G1044500	3	1	21	2234	2254	AAGCUCAGGAGGGAUAGCGCC	::. :::::::::: ::::::	GGUUCUAUCCCUCCGGAGCUU	Cleavage
mdm-miR390eMIMAT0025973	MD00G1170400	3	1	21	811	831	AAGCUCAGGAGGGAUAGCGCC	::::::::..:::::::	UCUUCUAUCCCUUUUGAGCUU	Cleavage
mdm-miR390eMIMAT0025973	MD13G1148600	3	1	21	439	459	AAGCUCAGGAGGGAUAGCGCC	::::::::::::::::	UUGUCUAUCCCUCCUGAGCUG	Cleavage
mdm-miR390eMIMAT0025973	MD00G1006500	3	1	21	514	534	AAGCUCAGGAGGGAUAGCGCC	:: ::.:.::::::::::::	GGAACUGUUCCUCCUGAGCUU	Cleavage
mdm-miR390eMIMAT0025973	MD10G1273200	3	1	21	595	615	AAGCUCAGGAGGGAUAGCGCC	:: ::.:.::::::::::::	GGAACUGUUCCUCCUGAGCUU	Cleavage
mdm-miR390eMIMAT0025973	MD10G1322900	3	1	21	45	65	AAGCUCAGGAGGGAUAGCGCC	:.::: :::.:::::::::	UGUGCUCUCCUUCCUGAGCUA	Cleavage
mdm-miR390eMIMAT0025973	MD07G1165400	3	1	21	165	185	AAGCUCAGGAGGGAUAGCGCC	:: .:::::::::::: :::	AGCCUUAUCCCUCCUGAUCUU	Cleavage
mdm-miR390eMIMAT0025973	MD11G1269700	3	1	21	829	849	AAGCUCAGGAGGGAUAGCGCC	: ::::::::.::.:: :.::	GCCGCUAUCCUUCUUGCGUUU	Cleavage
mdm-miR390eMIMAT0025973	MD00G1030600	3	1	21	1640	1660	AAGCUCAGGAGGGAUAGCGCC	.:::::.:::.:::.:::	AUUGCUAUUCCUUCUGGGCUC	Cleavage
mdm-miR390eMIMAT0025973	MD10G1061600	3	1	21	108	128	AAGCUCAGGAGGGAUAGCGCC	::.:::.:.::::::: ::	UACGUUAUUCUUCCUGAGGUU	Cleavage
mdm-miR390eMIMAT0025973	MD08G1047600	3	1	21	1562	1582	AAGCUCAGGAGGGAUAGCGCC	::::.:.:::. :::::::	UACGCUGUUCCUUAUGAGCUU	Cleavage
mdm-miR390eMIMAT0025973	MD09G1171000	3	1	21	2245	2265	AAGCUCAGGAGGGAUAGCGCC	.:::.:. :::::::::::	ACUGCUGUUGCUCCUGAGCUU	Cleavage
mdm-miR390eMIMAT0025973	MD17G1155900	3	1	21	2251	2271	AAGCUCAGGAGGGAUAGCGCC	.:::.:. :::::::::::	ACUGCUGUUGCUCCUGAGCUU	Cleavage
mdm-miR390eMIMAT0025973	MD09G1232100	3	1	21	109	129	AAGCUCAGGAGGGAUAGCGCC	: :: ::::::.:::.::::	AGGGCCAUCCCUUCUGGGCUU	Cleavage
mdm-miR390eMIMAT0025973	MD17G1209500	3	1	21	217	237	AAGCUCAGGAGGGAUAGCGCC	: :: ::::::.:::.::::	AGGGCCAUCCCUUCUGGGCUU	Cleavage
mdm-miR390eMIMAT0025973	MD16G1222000	3	1	21	545	565	AAGCUCAGGAGGGAUAGCGCC	:: ::: ::::.:::::.::	AGCUCUAGCCCUUCUGAGUUU	Cleavage
mdm-miR390eMIMAT0025973	MD12G1263300	3	1	21	861	881	AAGCUCAGGAGGGAUAGCGCC	::: :::::::.::.:::	UACGCGAUCCCUCUUGGGCUC	Cleavage
mdm-miR390eMIMAT0025973	MD15G1228300	3	1	21	188	208	AAGCUCAGGAGGGAUAGCGCC	: .:: ::::::.:::.:.::	GUUGCAAUCCCUUCUGGGUUU	Cleavage
mdm-miR395lMIMAT0043626	MD15G1104100	3	1	21	327	347	CUGAAGUGUUUGGGGGAACCC	:::::.:..:::::.:::::	GGGUUUCUUCAAACGCUUCAU	Cleavage
mdm-miR395lMIMAT0043626	MD09G1172400	3	1	21	256	276	CUGAAGUGUUUGGGGGAACCC	:: ::::.::::.:::::::	GGAUUCCUCCAAGCACUUCAA	Cleavage
mdm-miR395lMIMAT0043626	MD16G1124000	3	1	21	1586	1606	CUGAAGUGUUUGGGGGAACCC	:: ::..:.::::::.:::::	GGAUUUUCUCAAACAUUUCAG	Cleavage
mdm-miR395lMIMAT0043626	MD11G1142900	3	1	21	1044	1064	CUGAAGUGUUUGGGGGAACCC	: ::::.:::.::::::::	AGUUUCCUCCAGACACUUCAA	Cleavage
mdm-miR395lMIMAT0043626	MD06G1134100	3	1	21	326	346	CUGAAGUGUUUGGGGGAACCC	:::: ::::::: :.:::::	AGGUUACCCCAAAGAUUUCAG	Cleavage
mdm-miR395lMIMAT0043626	MD13G1201500	3	1	21	373	393	CUGAAGUGUUUGGGGGAACCC	: :::::.:::::: :::::	GAGUUCCUCCAAACUCUUCAU	Cleavage
mdm-miR395lMIMAT0043626	MD16G1201400	3	1	21	523	543	CUGAAGUGUUUGGGGGAACCC	: :::::.:::::: :::::	GAGUUCCUCCAAACUCUUCAU	Cleavage
mdm-miR395lMIMAT0043626	MD15G1246100	3	1	21	318	338	CUGAAGUGUUUGGGGGAACCC	: :::::.:::..:::::: :	GUGUUCCUCCAGGCACUUCUG	Cleavage
mdm-miR395lMIMAT0043626	MD02G1132300	3	1	21	275	295	CUGAAGUGUUUGGGGGAACCC	: :::::.:::..:::::: :	GUGUUCCUCCAGGCACUUCUG	Cleavage
mdm-miR395lMIMAT0043626	MD15G1418600	3	1	21	802	822	CUGAAGUGUUUGGGGGAACCC	::.::.::.:::.:::::	CCUUUUCCUCAGACAUUUCAG	Cleavage
mdm-miR395lMIMAT0043626	MD13G1015100	3	1	21	418	438	CUGAAGUGUUUGGGGGAACCC	::::..:::.: :::::::	CUGUUCUUCCAGAAACUUCAG	Cleavage
mdm-miR395lMIMAT0043626	MD01G1158900	3	1	21	1207	1227	CUGAAGUGUUUGGGGGAACCC	:: :::.:::::.:::::	CAAUUGCCCUAAACAUUUCAG	Cleavage
mdm-miR395lMIMAT0043626	MD05G1346600	3	1	21	1923	1943	CUGAAGUGUUUGGGGGAACCC	: ::::: .:.::::.::.::	GAGUUCCAUCGAACAUUUUAG	Cleavage
mdm-miR395lMIMAT0043626	MD01G1019600	3	1	21	3010	3030	CUGAAGUGUUUGGGGGAACCC	: : ::::.::.:..::::::	GAGAUCCCUCAGAUGCUUCAG	Cleavage
mdm-miR395lMIMAT0043626	MD00G1032500	3	1	21	1028	1048	CUGAAGUGUUUGGGGGAACCC	:: ::.:::::: ::::::	AUGUACCUCCAAACUCUUCAG	Cleavage
mdm-miR396dMIMAT0025992	MD08G1075700	3	1	21	2104	2124	UUCCACAGCUUUCUUGAACUU	:::::::. :::::::::::	AAGUUCAGUAAAGCUGUGGAC	Cleavage
mdm-miR396dMIMAT0025992	MD04G1191700	3	1	21	514	534	UUCCACAGCUUUCUUGAACUU	.:: :::::..::.::::::.	GAGGUCAAGGGAGUUGUGGAG	Cleavage
mdm-miR396dMIMAT0025992	MD02G1088800	3	1	21	514	535	UUCCACA-GCUUUCUUGAACUU	:::::::::::: :::::::	CCGUUCAAGAAAGCCUGUGGAA	Cleavage
mdm-miR396dMIMAT0025992	MD15G1216000	3	1	21	455	476	UUCCACA-GCUUUCUUGAACUU	:::::::::::: :::::::	CCGUUCAAGAAAGCCUGUGGAA	Cleavage
mdm-miR396dMIMAT0025992	MD00G1001000	3	1	21	409	430	UUCCAC-AGCUUUCUUGAACUU	::::::::::::: ::::::	UCGUUCAAGAAAGCUUGUGGAA	Cleavage
mdm-miR396dMIMAT0025992	MD06G1014700	3	1	21	480	501	UUCCAC-AGCUUUCUUGAACUU	::::::::::::: ::::::	UCGUUCAAGAAAGCUUGUGGAA	Cleavage
mdm-miR396dMIMAT0025992	MD04G1215900	3	1	21	462	483	UUCCACA-GCUUUCUUGAACUU	:::::::::::: :::::::	CCGUUCAAGAAAGCCUGUGGAA	Cleavage
mdm-miR396dMIMAT0025992	MD06G1121000	3	1	21	678	699	UUCCACA-GCUUUCUUGAACUU	:::::::::::: :::::::	CCGUUCAAGAAAGCCUGUGGAA	Cleavage
mdm-miR396dMIMAT0025992	MD13G1163500	3	1	21	862	882	UUCCACAGCUUUCUUGAACUU	.::: .::::::::::::: :	GAGUAUAAGAAAGCUGUGGCA	Cleavage
mdm-miR396dMIMAT0025992	MD00G1142400	3	1	21	697	718	UUCCACA-GCUUUCUUGAACUU	:::::::::::: :::::::	CCGUUCAAGAAAGCCUGUGGAA	Cleavage
mdm-miR396dMIMAT0025992	MD09G1183300	3	1	21	706	727	UUCCACA-GCUUUCUUGAACUU	:::::::::::: :::::::	CCGUUCAAGAAAGCCUGUGGAA	Cleavage
mdm-miR396dMIMAT0025992	MD12G1020500	3	1	21	1100	1121	UUCCACA-GCUUUCUUGAACUU	:::::::::::: :::::::	CCGUUCAAGAAAGCCUGUGGAA	Cleavage
mdm-miR396dMIMAT0025992	MD14G1017600	3	1	21	706	727	UUCCACA-GCUUUCUUGAACUU	:::::::::::: :::::::	CCGUUCAAGAAAGCCUGUGGAA	Cleavage
mdm-miR396dMIMAT0025992	MD02G1201000	3	1	21	588	609	UUCCACA-GCUUUCUUGAACUU	:::::::::::: :::::::	GCGUUCAAGAAAGCAUGUGGAA	Cleavage
mdm-miR396dMIMAT0025992	MD15G1300900	3	1	21	871	892	UUCCACA-GCUUUCUUGAACUU	:::::::::::: :::::::	UCGUUCAAGAAAGCCUGUGGAA	Cleavage
mdm-miR396dMIMAT0025992	MD07G1297800	3	1	21	963	984	UUCCACA-GCUUUCUUGAACUU	:::::::::::: :::::::	CCGUUCAAGAAAGCAUGUGGAA	Cleavage
mdm-miR396dMIMAT0025992	MD15G1065000	3	1	21	901	922	UUCCACA-GCUUUCUUGAACUU	:::::::::::: :::::::	CCGUUCAAGAAAGCCUGUGGAA	Cleavage
mdm-miR396dMIMAT0025992	MD02G1189500	3	1	21	998	1019	UUCCACA-GCUUUCUUGAACUU	:::::::::::: :::::::	UCGUUCAAGAAAGCCUGUGGAA	Cleavage
mdm-miR396dMIMAT0025992	MD08G1235200	3	1	21	1165	1184	UUCCACAGCUUUCUUGAACUU	::::: :::.:.:::::::::	AAGUU-AAGGAGGCUGUGGAA	Cleavage
mdm-miR396dMIMAT0025992	MD14G1039500	3	1	21	1288	1308	UUCCACAGCUUUCUUGAACUU	: ::::: :::::::::::.	CACUUCAAAAAAGCUGUGGAG	Cleavage
mdm-miR396dMIMAT0025992	MD12G1040500	3	1	21	1285	1305	UUCCACAGCUUUCUUGAACUU	: ::::: :::::::::::.	CACUUCAAAAAAGCUGUGGAG	Cleavage
mdm-miR396dMIMAT0025992	MD06G1114400	3	1	21	978	998	UUCCACAGCUUUCUUGAACUU	::::::.:::.::::::	CUAUUCAAGGAAGUUGUGGAU	Cleavage
mdm-miR396dMIMAT0025992	MD12G1008000	3	1	21	1561	1581	UUCCACAGCUUUCUUGAACUU	::::. : ::::::::::::	CAGUUUUACAAAGCUGUGGAA	Cleavage
mdm-miR396dMIMAT0025992	MD03G1043400	3	1	21	1794	1814	UUCCACAGCUUUCUUGAACUU	..: :::::::: :::::::.	GGGGUCAAGAAACCUGUGGAG	Cleavage
mdm-miR396dMIMAT0025992	MD02G1221000	3	1	21	115	135	UUCCACAGCUUUCUUGAACUU	::::::::.:::: ::::	AUAUUCAAGAAGGCUGCGGAA	Cleavage
mdm-miR396dMIMAT0025992	MD05G1002200	3	1	21	1306	1326	UUCCACAGCUUUCUUGAACUU	:::.:::.:.: :::::::	GUGUUUAAGGAGGAUGUGGAA	Cleavage
mdm-miR396dMIMAT0025992	MD03G1077900	3	1	21	911	931	UUCCACAGCUUUCUUGAACUU	::::::::::::: ::::	CUGUUCAAGAAAGCUUGGGAA	Cleavage
mdm-miR396dMIMAT0025992	MD15G1241700	3	1	21	941	961	UUCCACAGCUUUCUUGAACUU	.: :::::.: :::::::::	UGGAUCAAGGAUGCUGUGGAA	Translation
mdm-miR396dMIMAT0025992	MD15G1162100	3	1	21	1136	1156	UUCCACAGCUUUCUUGAACUU	:: ::::::::::::::	CCAUUGAAGAAAGCUGUGGAU	Cleavage
mdm-miR396dMIMAT0025992	MD14G1177300	3	1	21	1376	1396	UUCCACAGCUUUCUUGAACUU	:::: :::::.::::::.	AUCUUCAUGAAAGUUGUGGAG	Cleavage
mdm-miR396dMIMAT0025992	MD16G1052600	3	1	21	4734	4754	UUCCACAGCUUUCUUGAACUU	::: .::.::::::::::	GUAUUCCGGAGAGCUGUGGAA	Cleavage
mdm-miR482bMIMAT0026022	MD11G1020200	3	1	22	493	514	UCUUUCCUAUCCCUCCCAUUCC	::::::::::: ::::: ::::	GGAAUGGGAGGCAUAGGCAAGA	Translation
mdm-miR482bMIMAT0026022	MD12G1180400	3	1	22	742	763	UCUUUCCUAUCCCUCCCAUUCC	::::::::::: ::::: ::::	GGAAUGGGAGGUAUAGGCAAGA	Translation
mdm-miR482bMIMAT0026022	MD17G1224100	3	1	22	532	553	UCUUUCCUAUCCCUCCCAUUCC	::::::::::::.:.::.:: :	GGAAUGGGAGGGGUGGGGAAAA	Cleavage
mdm-miR482bMIMAT0026022	MD11G1020500	3	1	22	537	558	UCUUUCCUAUCCCUCCCAUUCC	::::::::::: ::::: ::::	GGAAUGGGAGGCAUAGGCAAGA	Translation
mdm-miR482bMIMAT0026022	MD11G1019800	3	1	22	537	558	UCUUUCCUAUCCCUCCCAUUCC	::::::::::: ::::: ::::	GGAAUGGGAGGCAUAGGCAAGA	Translation
mdm-miR482bMIMAT0026022	MD11G1054600	3	1	22	613	634	UCUUUCCUAUCCCUCCCAUUCC	::::::::::: :: :::::::	GGAAUGGGAGGCAUCGGAAAGA	Translation
mdm-miR482bMIMAT0026022	MD03G1034200	3	1	22	206	227	UCUUUCCUAUCCCUCCCAUUCC	::::::: ::::.::::::: :	GGAAUGGAAGGGGUAGGAAAUA	Cleavage
mdm-miR482bMIMAT0026022	MD05G1022400	3	1	22	724	745	UCUUUCCUAUCCCUCCCAUUCC	::.::::::::::: :: ::::	GGGAUGGGAGGGAUUGGUAAGA	Cleavage
mdm-miR482bMIMAT0026022	MD03G1006200	3	1	22	598	619	UCUUUCCUAUCCCUCCCAUUCC	:::::::: :::.: :::::::	GGAAUGGGUGGGGUUGGAAAGA	Cleavage
mdm-miR482bMIMAT0026022	MD11G1064300	3	1	22	106	127	UCUUUCCUAUCCCUCCCAUUCC	::.:::: ::: ::.:::::::	GGGAUGGAAGGCAUGGGAAAGA	Translation
mdm-miR482bMIMAT0026022	MD17G1224600	3	1	22	649	670	UCUUUCCUAUCCCUCCCAUUCC	::::::: :::::.::::.::	GGAAUGGAUGGGAUGGGAAGGA	Cleavage
mdm-miR482bMIMAT0026022	MD09G1225800	3	1	22	720	741	UCUUUCCUAUCCCUCCCAUUCC	::::::: :::::.::::.::	GGAAUGGAUGGGAUGGGAAGGA	Cleavage
mdm-miR482bMIMAT0026022	MD15G1035600	3	1	22	436	457	UCUUUCCUAUCCCUCCCAUUCC	::.::::: :: ::.:::::::	GGGAUGGGCGGAAUGGGAAAGA	Translation
mdm-miR482bMIMAT0026022	MD17G1025700	3	1	22	1979	2000	UCUUUCCUAUCCCUCCCAUUCC	::.:: ::.:: ::::::::::	GGGAUUGGGGGCAUAGGAAAGA	Translation
mdm-miR482bMIMAT0026022	MD08G1056600	3	1	22	216	237	UCUUUCCUAUCCCUCCCAUUCC	:: ::::::::::: ::.:::	GGCAUGGGAGGGAUCGGGAAGU	Cleavage
mdm-miR482bMIMAT0026022	MD08G1128800	3	1	22	631	652	UCUUUCCUAUCCCUCCCAUUCC	:: ::::::::::: ::.:::	GGCAUGGGAGGGAUCGGGAAGU	Cleavage
mdm-miR482bMIMAT0026022	MD10G1135300	3	1	22	1341	1362	UCUUUCCUAUCCCUCCCAUUCC	:: :::::::: :: :::::::	GGUAUGGGAGGUAUUGGAAAGA	Translation
mdm-miR482bMIMAT0026022	MD11G1070100	3	1	22	5196	5217	UCUUUCCUAUCCCUCCCAUUCC	::::::::::::.:::: :	CCAAUGGGAGGGAUGGGAAUGC	Cleavage
mdm-miR482bMIMAT0026022	MD05G1078200	3	1	22	38	59	UCUUUCCUAUCCCUCCCAUUCC	:: :: :::::::.:::.:::	AGAUUGAGAGGGAUGGGAGAGA	Cleavage
mdm-miR482bMIMAT0026022	MD05G1019100	3	1	22	730	751	UCUUUCCUAUCCCUCCCAUUCC	:.::::: :::::.:: ::::	UGGAUGGGUGGGAUGGGCAAGA	Cleavage
mdm-miR482bMIMAT0026022	MD07G1127000	3	1	22	58	79	UCUUUCCUAUCCCUCCCAUUCC	::. : ::::::::::.::::	AGAGAGAGAGGGAUAGGGAAGA	Cleavage
mdm-miR482bMIMAT0026022	MD05G1257400	3	1	22	47	68	UCUUUCCUAUCCCUCCCAUUCC	:: :: :::::::.:::.:::	AGAUUGAGAGGGAUGGGAGAGA	Cleavage
mdm-miR482bMIMAT0026022	MD05G1008000	3	1	22	2384	2405	UCUUUCCUAUCCCUCCCAUUCC	:: :: :::::::.:::.:::	AGAUUGAGAGGGAUGGGAGAGA	Cleavage
mdm-miR482bMIMAT0026022	MD11G1066900	3	1	22	607	628	UCUUUCCUAUCCCUCCCAUUCC	:: ::::: :::.: :::::::	GGUAUGGGCGGGGUUGGAAAGA	Cleavage
mdm-miR482bMIMAT0026022	MD02G1314300	3	1	22	592	613	UCUUUCCUAUCCCUCCCAUUCC	:: :::: .::::: :::::::	GGCAUGGCGGGGAUCGGAAAGA	Cleavage
mdm-miR482bMIMAT0026022	MD14G1006500	3	1	22	2471	2492	UCUUUCCUAUCCCUCCCAUUCC	:::::::::.::.::::	CUUGGGGGAGGGAUGGGGAAGA	Cleavage
mdm-miR482bMIMAT0026022	MD08G1001700	3	1	22	714	735	UCUUUCCUAUCCCUCCCAUUCC	.::: :::::::: :::.::	AAGAUGAGAGGGAUAUGAAGGA	Cleavage
mdm-miR482bMIMAT0026022	MD15G1001000	3	1	22	737	758	UCUUUCCUAUCCCUCCCAUUCC	.::: :::::::: :::.::	AAGAUGAGAGGGAUAUGAAGGA	Cleavage
mdm-miR482bMIMAT0026022	MD17G1145900	3	1	22	954	975	UCUUUCCUAUCCCUCCCAUUCC	.::: :::::::: :::.::	AAGAUGAGAGGGAUAUGAAGGA	Cleavage
mdm-miR482bMIMAT0026022	MD09G1160100	3	1	22	990	1011	UCUUUCCUAUCCCUCCCAUUCC	.::: :::::::: :::.::	AAGAUGAGAGGGAUAUGAAGGA	Cleavage
mdm-miR482cMIMAT0026023	MD07G1269600	3	1	22	151	172	UCUUUCCUAACCCUCCCAUUCC	:::::::::::: :: ::::::	GGAAUGGGAGGGAUAAGAAAGA	Translation
mdm-miR482cMIMAT0026023	MD14G1072500	3	1	22	727	748	UCUUUCCUAACCCUCCCAUUCC	::: ::::::: :::::.::::	GGAUUGGGAGGUUUAGGGAAGA	Translation
mdm-miR482cMIMAT0026023	MD12G1256300	3	1	22	734	755	UCUUUCCUAACCCUCCCAUUCC	::.::::: :: ::.:::::::	GGGAUGGGUGGUUUGGGAAAGA	Translation
mdm-miR482cMIMAT0026023	MD15G1066400	3	1	22	974	995	UCUUUCCUAACCCUCCCAUUCC	: :.:::: ::::::::::.:	GUAGUGGGUGGGUUAGGAAGGU	Cleavage
mdm-miR482cMIMAT0026023	MD10G1036400	3	1	22	1292	1313	UCUUUCCUAACCCUCCCAUUCC	:: ::::: ::::::::::.	CUAAAGGGAGAGUUAGGAAAGG	Cleavage
mdm-miR482cMIMAT0026023	MD07G1075300	3	1	22	1049	1070	UCUUUCCUAACCCUCCCAUUCC	:.::: ::::: ::::::::	AAAGUGGUAGGGUCAGGAAAGA	Cleavage
mdm-miR482cMIMAT0026023	MD05G1065100	3	1	22	1196	1217	UCUUUCCUAACCCUCCCAUUCC	:. :: :::::::::::..::	UGGCUGAGAGGGUUAGGAGGGA	Cleavage
mdm-miR482cMIMAT0026023	MD11G1157100	3	1	22	128	149	UCUUUCCUAACCCUCCCAUUCC	.:::: : :::::::.::::	CUGAUGGAAUGGUUAGGGAAGA	Cleavage
mdm-miR482cMIMAT0026023	MD12G1138300	3	1	22	506	527	UCUUUCCUAACCCUCCCAUUCC	: ::: :::::::. ::::::	AGCAUGAGAGGGUUGCGAAAGA	Cleavage
mdm-miR482cMIMAT0026023	MD06G1019800	3	1	22	242	263	UCUUUCCUAACCCUCCCAUUCC	::: :::::::::.:::.	UAGCUGGUAGGGUUAGGGAAGG	Cleavage
mdm-miR482cMIMAT0026023	MD13G1094100	3	1	22	1160	1181	UCUUUCCUAACCCUCCCAUUCC	: :: ::::: :::::::::.	AGCAUUGGAGGUUUAGGAAAGG	Translation
mdm-miR5225cMIMAT0026052	MD16G1197500	3	1	22	2642	2663	UCUGUCGUGGGUGAGAUGGUGC	:::.:::.:::.::: ::::::	GCAUCAUUUCAUCCAAGACAGA	Cleavage
mdm-miR5225cMIMAT0026052	MD13G1241000	3	1	22	335	356	UCUGUCGUGGGUGAGAUGGUGC	::.::::::: ::..::::::.	GCGCCAUCUCUCCUGCGACAGG	Cleavage
mdm-miR5225cMIMAT0026052	MD16G1246100	3	1	22	1148	1169	UCUGUCGUGGGUGAGAUGGUGC	::.::::::: ::..::::::.	GCGCCAUCUCUCCUGCGACAGG	Cleavage
mdm-miR5225cMIMAT0026052	MD02G1297200	3	1	22	1479	1500	UCUGUCGUGGGUGAGAUGGUGC	....::::::.:..::::::.	CUGUUAUCUCAUCUGCGACAGG	Cleavage
mdm-miR5225cMIMAT0026052	MD15G1157600	3	1	22	2341	2362	UCUGUCGUGGGUGAGAUGGUGC	: .::::::.:.::.:..:::	UCUUCAUCUCGCUCAUGGUAGA	Cleavage
mdm-miR5225cMIMAT0026052	MD10G1006400	3	1	22	3896	3917	UCUGUCGUGGGUGAGAUGGUGC	::.:::::.:.:::: :::	AGUCCGUCUCAUCUACGAGAGA	Cleavage
mdm-miR5225cMIMAT0026052	MD10G1006800	3	1	22	3424	3445	UCUGUCGUGGGUGAGAUGGUGC	::.:::::.:.:::: :::	AGUCCGUCUCAUCUACGAGAGA	Cleavage
mdm-miR7121cMIMAT0026042	MD02G1024300	3	1	21	144	164	UCCUCUUGGUGAUCGCCCUGU	::::::.:::.::::::. ::	ACAGGGUGAUUACCAAGGUGA	Cleavage
mdm-miR7121cMIMAT0026042	MD10G1176800	3	1	21	207	227	UCCUCUUGGUGAUCGCCCUGU	::::: :::.::::: ::::	CCAGGGGGAUUACCAAAAGGA	Cleavage
mdm-miR7121cMIMAT0026042	MD14G1007700	3	1	21	1104	1124	UCCUCUUGGUGAUCGCCCUGU	.:::.:.:::.:::::::	UAGGGGUGGUCAUCAAGAGGU	Cleavage
mdm-miR7121cMIMAT0026042	MD11G1201000	3	1	21	370	390	UCCUCUUGGUGAUCGCCCUGU	...: :.:.::::::::.:::	GUGGAGUGGUCACCAAGGGGA	Cleavage
mdm-miR7121cMIMAT0026042	MD02G1307800	3	1	21	380	400	UCCUCUUGGUGAUCGCCCUGU	::: :::.::::.:::::	CAAGGUGGAUUACCAGGAGGA	Cleavage
mdm-miR7121cMIMAT0026042	MD07G1017800	3	1	21	321	341	UCCUCUUGGUGAUCGCCCUGU	::: :::.::::.:::::	CAAGGUGGAUUACCAGGAGGA	Cleavage
mdm-miR7121eMIMAT0026044	MD02G1024300	3	1	21	144	164	UCCUCUUGGUGAUCGCCCUGC	:::::.:::.::::::. ::	ACAGGGUGAUUACCAAGGUGA	Cleavage
mdm-miR7121eMIMAT0026044	MD11G1201000	3	1	21	370	390	UCCUCUUGGUGAUCGCCCUGC	:..: :.:.::::::::.:::	GUGGAGUGGUCACCAAGGGGA	Cleavage
mdm-miR7121eMIMAT0026044	MD10G1176800	3	1	21	207	227	UCCUCUUGGUGAUCGCCCUGC	::::: :::.::::: ::::	CCAGGGGGAUUACCAAAAGGA	Cleavage
mdm-miR7121eMIMAT0026044	MD14G1007700	3	1	21	1104	1124	UCCUCUUGGUGAUCGCCCUGC	.:::.:.:::.:::::::	UAGGGGUGGUCAUCAAGAGGU	Cleavage
mdm-miR858MIMAT0026070	MD10G1184100	3	1	21	468	488	UUCGUUGUCUGUUCGACCUGA	: ::::: ::::::::.:::	CCUGGUCGCACAGACAAUGAA	Cleavage
mdm-miR858MIMAT0026070	MD05G1197600	3	1	21	467	487	UUCGUUGUCUGUUCGACCUGA	: ::::: ::::::::.:::	CCUGGUCGCACAGACAAUGAA	Cleavage
mdm-miR858MIMAT0026070	MD13G1026400	3	1	21	382	402	UUCGUUGUCUGUUCGACCUGA	:::: :: ::::::::.:::	CCAGGACGUACAGACAAUGAA	Cleavage
mdm-miR858MIMAT0026070	MD10G1205400	3	1	21	298	318	UUCGUUGUCUGUUCGACCUGA	:.:: :::::.:::::.::.	CCGGGACGAACGGACAAUGAG	Cleavage
mdm-miR858MIMAT0026070	MD16G1029400	3	1	21	418	438	UUCGUUGUCUGUUCGACCUGA	:::: :: ::::::::.:::	CCAGGACGUACAGACAAUGAA	Cleavage
mdm-miR858MIMAT0026070	MD07G1211300	3	1	21	414	434	UUCGUUGUCUGUUCGACCUGA	::::: :::::::.:::: :	CCAGGUAGAACAGAUAACGCA	Cleavage
mdm-miR858MIMAT0026070	MD08G1206600	3	1	21	804	824	UUCGUUGUCUGUUCGACCUGA	: .:::.::.:::.:.:.:::	UGGGGUUGAGCAGGCGAUGAA	Cleavage
mdm-miR858MIMAT0026070	MD15G1390100	3	1	21	804	824	UUCGUUGUCUGUUCGACCUGA	: .:::.::.:::.:.:.:::	UGGGGUUGAGCAGGCGAUGAA	Cleavage
mdm-miR858MIMAT0026070	MD05G1318100	3	1	21	369	389	UUCGUUGUCUGUUCGACCUGA	::::::.: :::::.::.:	CGAGGUCGGAGAGACAGCGGA	Translation
mdm-miR858MIMAT0026070	MD06G1098100	3	1	21	2090	2110	UUCGUUGUCUGUUCGACCUGA	:::::::. .:::::::.:	CAAGGUCGAGGGGACAACGGA	Translation
mdm-miR858MIMAT0026070	MD00G1065700	3	1	21	383	403	UUCGUUGUCUGUUCGACCUGA	:::: :.::::::::.:::	CCAGGAAGGACAGACAAUGAA	Cleavage
mdm-miR858MIMAT0026070	MD09G1073600	3	1	21	298	318	UUCGUUGUCUGUUCGACCUGA	:::: ::::::::::.::.	CCAGGGAGAACAGACAAUGAG	Cleavage
mdm-miR858MIMAT0026070	MD16G1271400	3	1	21	379	399	UUCGUUGUCUGUUCGACCUGA	:::: ::::.::.::::::	CCAGGGAGAACGGAUAACGAA	Cleavage
mdm-miR858MIMAT0026070	MD17G1279200	3	1	21	362	382	UUCGUUGUCUGUUCGACCUGA	: ::: ::::::::::.::.	CCUGGUAGAACAGACAAUGAG	Cleavage
mdm-miR858MIMAT0026070	MD09G1286900	3	1	21	355	375	UUCGUUGUCUGUUCGACCUGA	: ::: ::::::::::.::.	CCCGGUAGAACAGACAAUGAG	Cleavage
mdm-miR858MIMAT0026070	MD06G1089700	3	1	21	240	260	UUCGUUGUCUGUUCGACCUGA	:.:: :::::::::::::.	CCGGGAAGAACAGACAACGAG	Cleavage
mdm-miR858MIMAT0026070	MD09G1191100	3	1	21	367	387	UUCGUUGUCUGUUCGACCUGA	:::: :::::::.::.:::	CCAGGAAGAACAGAUAAUGAA	Cleavage
mdm-miR858MIMAT0026070	MD14G1227500	3	1	21	363	383	UUCGUUGUCUGUUCGACCUGA	:.:: ::::::::::.:::	CCGGGAAGAACAGACAAUGAA	Cleavage
mdm-miR858MIMAT0026070	MD16G1158800	3	1	21	361	381	UUCGUUGUCUGUUCGACCUGA	:::: ::::::::::.::.	CCAGGAAGAACAGACAAUGAG	Cleavage
mdm-miR858MIMAT0026070	MD17G1173700	3	1	21	373	393	UUCGUUGUCUGUUCGACCUGA	:::: :::::::.::.:::	CCAGGAAGAACAGAUAAUGAA	Cleavage
mdm-miR858MIMAT0026070	MD17G1086000	3	1	21	382	402	UUCGUUGUCUGUUCGACCUGA	:::: :.::::::::.:::	CCAGGAAGGACAGACAAUGAA	Cleavage
mdm-miR858MIMAT0026070	MD14G1172900	3	1	21	536	556	UUCGUUGUCUGUUCGACCUGA	:::: ::::::::::.::.	CCAGGAAGAACAGACAAUGAG	Cleavage
mdm-miR858MIMAT0026070	MD06G1217200	3	1	21	600	620	UUCGUUGUCUGUUCGACCUGA	:.:: ::::::::::.:::	CCGGGAAGAACAGACAAUGAA	Cleavage
mdm-miR858MIMAT0026070	MD11G1215600	3	1	21	379	399	UUCGUUGUCUGUUCGACCUGA	: :: :::::.::::::::.	CCUGGACGAACGGACAACGAG	Cleavage
mdm-miR858MIMAT0026070	MD12G1198600	3	1	21	480	500	UUCGUUGUCUGUUCGACCUGA	:::: ::::::::::.::.	CCAGGAAGAACAGACAAUGAG	Cleavage
mdm-miR858MIMAT0026070	MD04G1184900	3	1	21	726	746	UUCGUUGUCUGUUCGACCUGA	:::: ::::::::::.::.	CCAGGAAGAACAGACAAUGAG	Cleavage
mdm-miR858MIMAT0026070	MD01G1174900	3	1	21	460	480	UUCGUUGUCUGUUCGACCUGA	: : :::::::::...:.:::	UAAUGUCGAACAGGUGAUGAA	Cleavage
mdm-miR858MIMAT0026070	MD15G1369700	3	1	21	310	330	UUCGUUGUCUGUUCGACCUGA	:: :::::.:::::.:::	GACGGCCGAACGGACAAUGAA	Cleavage
mdm-miR858MIMAT0026070	MD08G1183100	3	1	21	326	346	UUCGUUGUCUGUUCGACCUGA	:: :::::.:::::.:::	GACGGCCGAACGGACAAUGAA	Cleavage
mdm-miR858MIMAT0026070	MD05G1105600	3	1	21	2969	2989	UUCGUUGUCUGUUCGACCUGA	:: : ::.:::::::.:::	AAAGAUGGAGCAGACAAUGAA	Cleavage
mes-miR319h	MD11G1215600	3	1	21	1100	1120	CUUGGACUGAAGGGAGCUCCU	::::::::::::: :::::	CGGAGCUCCCUUCAAACCAAG	Cleavage
mes-miR319h	MD17G1233500	3	1	21	1270	1290	CUUGGACUGAAGGGAGCUCCU	.::::. ::::::::::::.	GGGAGUACCCUUCAGUCCAGU	Cleavage
mes-miR319h	MD11G1053300	3	1	21	186	206	CUUGGACUGAAGGGAGCUCCU	:::: :::.:::::: ::::	UGGAGAUCCUUUCAGUGCAAG	Cleavage
mes-miR319h	MD09G1274200	3	1	21	1694	1714	CUUGGACUGAAGGGAGCUCCU	::::.:::: ::::::::	CUUAGCUUCCUUGAGUCCAAG	Cleavage
mes-miR319h	MD14G1050500	3	1	21	471	491	CUUGGACUGAAGGGAGCUCCU	:. :::::::..::.::::	CAGGUCUCCCUUUGGUUCAAG	Cleavage
mes-miR319h	MD08G1040000	3	1	21	235	255	CUUGGACUGAAGGGAGCUCCU	:: :::::::::::.: ::	CCGAACUCCCUUCAGUUCCAG	Cleavage
mtr-miR4414a-5p	MD11G1213500	3	1	21	334	354	AGCUGCUGACUCGUUGGUUCA	:::: ::.::::..::::.:	AGAACAAAUGAGUUGGCAGUU	Cleavage
mtr-miR4414a-5p	MD15G1233700	3	1	21	1213	1233	AGCUGCUGACUCGUUGGUUCA	:::: ::::::::::::	UCCACCACCGAGUCAGCAGCC	Cleavage
mtr-miR4414a-5p	MD13G1157500	3	1	21	200	220	AGCUGCUGACUCGUUGGUUCA	:. : :.::::::::::::	CAAGACCAUGAGUCAGCAGCU	Cleavage
mtr-miR4414a-5p	MD10G1124500	3	1	21	1408	1428	AGCUGCUGACUCGUUGGUUCA	:.: : ::::::::.::::	AAAGCGAUCGAGUCAGUAGCU	Cleavage
mtr-miR4414a-5p	MD14G1187400	3	1	21	192	212	AGCUGCUGACUCGUUGGUUCA	:: .: ::::::.::::::	CCAAAUACCGAGUCGGCAGCU	Cleavage
peu-miR2910	MD17G1017400	3	1	21	799	819	UAGUUGGUGGAGCGAUUUGUC	: :.:::::::::::::.:	CAGAGAUCGCUCCACCAAUUC	Cleavage
peu-miR2910	MD10G1085400	3	1	21	352	372	UAGUUGGUGGAGCGAUUUGUC	:::::.:.::.:::::.:	UCCAAAUUGUUCUACCAAUUU	Cleavage
peu-miR2910	MD05G1070800	3	1	21	613	633	UAGUUGGUGGAGCGAUUUGUC	:::::.:.::.:::::.:	UCCAAAUUGUUCUACCAAUUU	Cleavage
peu-miR2910	MD09G1205400	3	1	21	417	437	UAGUUGGUGGAGCGAUUUGUC	.:::::.:::::.::::.	AGGGAAUCGUUCCACUAACUG	Cleavage
peu-miR2910	MD15G1344300	3	1	21	230	250	UAGUUGGUGGAGCGAUUUGUC	: :::: ::.::::::.:::	GUCAAAGCGUUCCACCGACUU	Cleavage
peu-miR2910	MD01G1196600	3	1	21	139	159	UAGUUGGUGGAGCGAUUUGUC	: :::: .:::::: ::::::	GCCAAAAUGCUCCAGCAACUA	Cleavage
peu-miR2910	MD05G1178400	3	1	21	36	56	UAGUUGGUGGAGCGAUUUGUC	: :::: . ::::::::::::	GUCAAACUCCUCCACCAACUA	Cleavage
peu-miR2910	MD07G1263500	3	1	21	139	159	UAGUUGGUGGAGCGAUUUGUC	:::: .:::::: ::::::	UCCAAAAUGCUCCAGCAACUA	Cleavage
peu-miR2910	MD12G1162000	3	1	21	162	182	UAGUUGGUGGAGCGAUUUGUC	:::: :::::::::.:: :	AUCAAACCGCUCCACCGACGA	Cleavage
peu-miR2910	MD12G1023500	3	1	21	413	433	UAGUUGGUGGAGCGAUUUGUC	.: ::: :.::::::::::.	UGCUAAUGGUUCCACCAACUG	Cleavage
ppe-miR858	MD00G1092300	3	1	21	488	508	CUCGUUGUCUGUUCGACCUUG	:::::::::::.::.::	CCUGGUCGAACAGAUAAUGAA	Cleavage
ppe-miR858	MD02G1087500	3	1	21	337	357	CUCGUUGUCUGUUCGACCUUG	:::::::::::.::.::	CCUGGUCGAACAGAUAAUGAA	Cleavage
ppe-miR858	MD10G1149200	3	1	21	340	360	CUCGUUGUCUGUUCGACCUUG	::::::..:::::::::	UACUGUCGAAUGGACAACGAG	Cleavage
ppe-miR858	MD09G1233300	3	1	21	247	267	CUCGUUGUCUGUUCGACCUUG	: :::::: :::::::.:::	AAUGGUCGACCAGACAAUGAG	Cleavage
ppe-miR858	MD07G1153200	3	1	21	438	458	CUCGUUGUCUGUUCGACCUUG	: .:::::::: ::.::.:::	CCGGGUCGAACCGAUAAUGAG	Translation
ppe-miR858	MD06G1196400	3	1	21	401	420	CUCGUUGUCUGUUCGACCUUG	::::: ::::::::::::::	CAAGGA-GAACAGACAACGAG	Cleavage
ppe-miR858	MD15G1051400	3	1	21	334	354	CUCGUUGUCUGUUCGACCUUG	: .:: :::::::::::.::	CCGGGGCGAACAGACAAUGAA	Cleavage
ppe-miR858	MD02G1312700	3	1	21	359	379	CUCGUUGUCUGUUCGACCUUG	: ::: :::::.:::::.::	CCAGGACGAACGGACAAUGAA	Cleavage
ppe-miR858	MD08G1070700	3	1	21	344	364	CUCGUUGUCUGUUCGACCUUG	: .:: :::::::::::.::	CCGGGGCGAACAGACAAUGAA	Cleavage
ppe-miR858	MD07G1010500	3	1	21	337	357	CUCGUUGUCUGUUCGACCUUG	: ::: :::::.:::::.::	CCAGGACGAACGGACAAUGAA	Cleavage
ppe-miR858	MD01G1144700	3	1	21	412	432	CUCGUUGUCUGUUCGACCUUG	: :::: :::::::.::::.	CCAGGUAGAACAGAUAACGGA	Cleavage
ppe-miR858	MD03G1037200	3	1	21	179	199	CUCGUUGUCUGUUCGACCUUG	:::: ::..:::.::.:::	ACAGGUGGAGUAGAUAAUGAG	Cleavage
ppe-miR858	MD06G1064300	3	1	21	55	75	CUCGUUGUCUGUUCGACCUUG	: ::: :::::::.::.:::	CCAGGGAGAACAGAUAAUGAG	Cleavage
ppe-miR858	MD17G1086700	3	1	21	360	380	CUCGUUGUCUGUUCGACCUUG	: ::: ::::.:::::.:::	CCAGGAAGAACGGACAAUGAG	Cleavage
ppe-miR858	MD07G1268000	3	1	21	350	370	CUCGUUGUCUGUUCGACCUUG	: ::: :.::::::::.:::	CCAGGAAGGACAGACAAUGAG	Cleavage
ppe-miR858	MD03G1217300	3	1	21	289	309	CUCGUUGUCUGUUCGACCUUG	: ::: :::::::.::.:::	CCAGGAAGAACAGAUAAUGAG	Cleavage
ppe-miR858	MD09G1098600	3	1	21	348	368	CUCGUUGUCUGUUCGACCUUG	: ::: ::::.:::::.:::	CCAGGAAGAACGGACAAUGAG	Cleavage
ppe-miR858	MD13G1158000	3	1	21	289	309	CUCGUUGUCUGUUCGACCUUG	: ::: ::::::::::.:.:	CCAGGAAGAACAGACAAUGGG	Cleavage
ppe-miR858	MD13G1039900	3	1	21	360	380	CUCGUUGUCUGUUCGACCUUG	: .:: ::::::::::.:::	CCGGGGAGAACAGACAAUGAG	Cleavage
ppe-miR858	MD16G1040800	3	1	21	406	426	CUCGUUGUCUGUUCGACCUUG	: .:: ::::::::::.:::	CCGGGAAGAACAGACAAUGAG	Cleavage
ppe-miR858	MD14G1110800	3	1	21	445	465	CUCGUUGUCUGUUCGACCUUG	:: ::::::::::::::	CCCGGAAGAACAGACAACGAG	Cleavage
ppe-miR858	MD04G1080600	3	1	21	465	485	CUCGUUGUCUGUUCGACCUUG	: ::: :::::::.::.:::	CCAGGGAGAACAGAUAAUGAG	Cleavage
ptc-miR159d	MD01G1178100	3	1	21	109	129	CUUGGAUUGAAGGGAGCUCCU	:::::::: :::.::::::	UGGAGCUCCAUUCGAUCCAAA	Cleavage
ptc-miR159d	MD14G1210400	3	1	21	399	419	CUUGGAUUGAAGGGAGCUCCU	::::::::. :.:::.::::	UGGAGCUCCUGUUAAUUCAAG	Translation
ptc-miR159d	MD06G1200700	3	1	21	530	550	CUUGGAUUGAAGGGAGCUCCU	::::::::. :.:::.::::	UGGAGCUCCUGUUAAUUCAAG	Translation
ptc-miR159d	MD00G1007700	3	1	21	469	489	CUUGGAUUGAAGGGAGCUCCU	::::: .::: :::::::::	CGGAGCAUCCUACAAUCCAAG	Translation
ptc-miR159d	MD15G1151800	3	1	21	561	581	CUUGGAUUGAAGGGAGCUCCU	:.:::.::::::.:.:::	UCGGGCUUCCUUCAGUUCAAA	Cleavage
ptc-miR159d	MD05G1018900	3	1	21	3681	3701	CUUGGAUUGAAGGGAGCUCCU	:::::.:.:::::: .:::	CUGAGCUUCUUUCAAUGUAAG	Cleavage
ptc-miR159d	MD12G1193400	3	1	21	1234	1254	CUUGGAUUGAAGGGAGCUCCU	: : ::::.::::::.::::	UGUAUCUCCUUUCAAUUCAAG	Cleavage
ptc-miR159d	MD02G1084600	3	1	21	265	285	CUUGGAUUGAAGGGAGCUCCU	: :::.: ::::..:::::.:	AUGAGUUGCCUUUGAUCCAGG	Cleavage
ptc-miR159d	MD04G1069600	3	1	21	1166	1186	CUUGGAUUGAAGGGAGCUCCU	::: :.:::::.::::::	UCAAGCACUCUUCAGUCCAAG	Cleavage
ptc-miR159d	MD11G1267200	3	1	21	657	677	CUUGGAUUGAAGGGAGCUCCU	: :::.::: :::::::::	UUGUGCUUCCUACAAUCCAAG	Translation
sit-miR05-npr	MD06G1010000	3	1	21	1424	1444	UUUCGGACCAGGCUUCAUUCC	::::: :::..:::::::..:	GGAAUCAAGUUUGGUCCGGGA	Cleavage
sit-miR05-npr	MD11G1246700	3	1	21	943	963	UUUCGGACCAGGCUUCAUUCC	: ::::::::.::::.: .::	GCAAUGAAGCUUGGUUCCGAA	Cleavage
sit-miR05-npr	MD17G1122600	3	1	21	30	50	UUUCGGACCAGGCUUCAUUCC	::::::: .::::.::::.	AAAAUGAAGGUUGGUUCGAAG	Cleavage
sit-miR05-npr	MD07G1128700	3	1	21	1405	1425	UUUCGGACCAGGCUUCAUUCC	:. ::::.:::::.::.::	UUAGGGAAGUCUGGUUCGGAA	Cleavage
t00370463_x599	MD03G1197600	3	1	24	227	250	AUCCCGUGAUCGUGACCGUUCAUC	:: :::.: :::::::::.::::	GACGAAUGAUCACGAUCAUGGGAA	Cleavage
t00370463_x599	MD12G1074700	3	1	24	322	345	AUCCCGUGAUCGUGACCGUUCAUC	:.:::.:::.:.:.:::.:	CGGUUAUGGUUACGGUUAUGGGGU	Cleavage
t00370463_x599	MD02G1232500	3	1	24	839	862	AUCCCGUGAUCGUGACCGUUCAUC	: : :::: ::.:.::::::::	CAAGCACGGCCAUGGUCACGGGAA	Cleavage
t00969484_x10829	MD11G1148100	3	1	24	357	380	GUGUCUGAGAGGUAAAAAGGGGUG	:::::: ::::::.::::: ::::	CACCCCAUUUUACUUCUCACACAC	Cleavage
t00969484_x10829	MD08G1121300	3	1	24	1321	1344	GUGUCUGAGAGGUAAAAAGGGGUG	:::::: ::::::.::::: ::::	CACCCCAUUUUACUUCUCACACAC	Cleavage
t00969484_x10829	MD01G1119700	3	1	24	1206	1229	GUGUCUGAGAGGUAAAAAGGGGUG	:::::: ::::::.::::: ::::	CACCCCAUUUUACUUCUCACACAC	Cleavage
t00969484_x10829	MD08G1032400	3	1	24	1451	1474	GUGUCUGAGAGGUAAAAAGGGGUG	:::::: ::::::.::::: ::::	CACCCCAUUUUACUUCUCACACAC	Cleavage
t00969484_x10829	MD15G1343900	3	1	24	1767	1790	GUGUCUGAGAGGUAAAAAGGGGUG	:::::: ::::::.::::: ::::	CACCCCAUUUUACUUCUCACACAC	Cleavage
t00969484_x10829	MD16G1023700	3	1	24	1970	1993	GUGUCUGAGAGGUAAAAAGGGGUG	:::::: ::::::.::::: ::::	CACCCCAUUUUACUUCUCACACAC	Cleavage
t00969484_x10829	MD00G1013300	3	1	24	1898	1921	GUGUCUGAGAGGUAAAAAGGGGUG	:::::: ::::::.::::: ::::	CACCCCAUUUUACUUCUCACACAC	Cleavage
t00969484_x10829	MD12G1056000	3	1	24	705	728	GUGUCUGAGAGGUAAAAAGGGGUG	:::.:: ::::::.::::: ::::	CACUCCAUUUUACUUCUCACACAC	Cleavage
t00969484_x10829	MD08G1087700	3	1	24	1465	1488	GUGUCUGAGAGGUAAAAAGGGGUG	::::. :::::::.::::: ::::	CACCUAUUUUUACUUCUCACACAC	Cleavage
t00969484_x10829	MD13G1194200	3	1	24	2162	2185	GUGUCUGAGAGGUAAAAAGGGGUG	::.::: ::::::.::::: ::::	CAUCCCAUUUUACUUCUCACACAC	Cleavage
t00969484_x10829	MD12G1020100	3	1	24	3629	3652	GUGUCUGAGAGGUAAAAAGGGGUG	:::.: :::::::.::::: ::::	CACUCAUUUUUACUUCUCAUACAC	Cleavage
t00969484_x10829	MD13G1255900	3	1	24	2541	2564	GUGUCUGAGAGGUAAAAAGGGGUG	:: ::.:::::::.:::.: ::::	CAACCUUUUUUACUUCUUACACAC	Cleavage
t00969484_x10829	MD03G1272200	3	1	24	1562	1585	GUGUCUGAGAGGUAAAAAGGGGUG	::: .::::::::::.::: :::	CACAUCUUUUUACCUUUCAUACAA	Cleavage
t00969484_x10829	MD04G1192300	3	1	24	514	537	GUGUCUGAGAGGUAAAAAGGGGUG	:: ::: ::::::.::::: ::::	CAACCCAUUUUACUUCUCACACAC	Cleavage
t00969484_x10829	MD03G1273200	3	1	24	1929	1952	GUGUCUGAGAGGUAAAAAGGGGUG	::...: ::::::.::::: ::::	CAUUUCAUUUUACUUCUCACACAC	Cleavage
t00969484_x10829	MD13G1175500	3	1	24	180	203	GUGUCUGAGAGGUAAAAAGGGGUG	:. :..::: ::::::::::::.	CGGCUUUUUGUACCUCUCAGACGA	Cleavage
t00969484_x10829	MD07G1111500	3	1	24	84	107	GUGUCUGAGAGGUAAAAAGGGGUG	..... :::::::::.:.::..::	UGUUUAUUUUUACCUUUUAGGUAC	Cleavage
t00969484_x10829	MD05G1124800	3	1	24	42	65	GUGUCUGAGAGGUAAAAAGGGGUG	.:.::::::..::::: ::::	GUAUCUUUUUUAUUUCUCAUACAC	Cleavage
t00969484_x10829	MD14G1206100	3	1	24	1088	1111	GUGUCUGAGAGGUAAAAAGGGGUG	..:: ::: :::..:::::::..:	UGCCGCUUGUUAUUUCUCAGAUGC	Cleavage
t00969484_x10829	MD00G1087400	3	1	24	1627	1650	GUGUCUGAGAGGUAAAAAGGGGUG	.: :::::::.::::: ::::	AUAUCAUUUUUACUUCUCAUACAC	Cleavage
t00969484_x10829	MD10G1077300	3	1	24	72	95	GUGUCUGAGAGGUAAAAAGGGGUG	: :::::: ::::.::: ::::	UUCGCCUUUUCACCUUUCACACAC	Cleavage
t00969484_x10829	MD10G1115100	3	1	24	261	284	GUGUCUGAGAGGUAAAAAGGGGUG	:: .::::: ::.:::..:.:::	CAAGUCUUUUCACUUCUUGGGCAC	Cleavage
t01163329_x11463	MD05G1111900	3	1	24	206	229	GUUUUUGAAUGAAAGGCUCAUGUG	::::.:: :::::::::::.:	ACCAUGGGCGUUUCAUUCAAAGAA	Cleavage
t01163329_x11463	MD05G1111700	3	1	24	470	493	GUUUUUGAAUGAAAGGCUCAUGUG	::::.:: :::::::::::.:	ACCAUGGGCGUUUCAUUCAAAGAA	Cleavage
t01163329_x11463	MD07G1191300	3	1	24	2384	2406	GUUUUUGAAUGAAAGGCUCAUGUG	:::: ::::.::::.: :.:::::	CACA-GAGCUUUUCGUCCGAAAAC	Cleavage
t01163329_x11463	MD10G1184400	3	1	24	699	722	GUUUUUGAAUGAAAGGCUCAUGUG	:. ::::.::::.::.::.::	ACCGAGAGCUUUUCGUUUAAGAAA	Cleavage
t01163329_x11463	MD07G1225100	3	1	24	608	631	GUUUUUGAAUGAAAGGCUCAUGUG	:: :.:.::::::::::.:: :	GACUCGGGUCUUUCAUUCAGAACC	Cleavage
t01163329_x11463	MD03G1237900	3	1	24	467	490	GUUUUUGAAUGAAAGGCUCAUGUG	::..::::.:::::.:::	ACCCGAAGUUUUUCGUUCAAGAAC	Cleavage
t03063567_x79	MD16G1008100	3	1	21	1668	1688	AGCUGCCGACUCAUUCAUUCA	:::::: :::.:::::::	CUUAUGAAUAAGUUGGCAGCU	Cleavage
t03063567_x79	MD12G1205700	3	1	21	854	874	AGCUGCCGACUCAUUCAUUCA	.::::: :.::::::::.:	CUGAUGAAGGGGUCGGCAGUU	Cleavage
t03063567_x79	MD11G1213500	3	1	21	334	354	AGCUGCCGACUCAUUCAUUCA	::: :::::::.:::::.:	AGAACAAAUGAGUUGGCAGUU	Cleavage
t03063567_x79	MD03G1148300	3	1	21	247	267	AGCUGCCGACUCAUUCAUUCA	: :::::::::::.::.:	GCCAAGAAUGAGUCGGUAGUU	Cleavage
t03063567_x79	MD17G1138700	3	1	21	20	40	AGCUGCCGACUCAUUCAUUCA	:::: :::::.::.::::	GAAAUGUCUGAGUUGGUAGCU	Cleavage
t05229383_x4081	MD01G1088700	3	1	21	1207	1227	CUUGCAUAUCUCAGGAGCUGC	:..:.:::::.:::::::.:	GUGGUUCCUGGGAUAUGCGAA	Cleavage
t05229383_x4081	MD05G1003800	3	1	21	3306	3326	CUUGCAUAUCUCAGGAGCUGC	:..:::::::::: .::.:::	GUGGCUCCUGAGAAGUGUAAG	Cleavage
t05229383_x4081	MD11G1041700	3	1	21	1221	1241	CUUGCAUAUCUCAGGAGCUGC	: :::::::::::::: .::	GAAGCUCCUGAGAUAUCUAAA	Cleavage
t05229383_x4081	MD02G1311600	3	1	21	288	308	CUUGCAUAUCUCAGGAGCUGC	.::.:.::::::: ::::.:	CUAGUUUCUGAGAUCUGCAGG	Cleavage
t05229383_x4081	MD11G1250500	3	1	21	370	390	CUUGCAUAUCUCAGGAGCUGC	: .:.:. ::::::.::::::	GAGGUUUAUGAGAUGUGCAAG	Cleavage
t05229383_x4081	MD06G1169200	3	1	21	1068	1088	CUUGCAUAUCUCAGGAGCUGC	: :::: :::.::::::: ::	GGAGCUGCUGGGAUAUGCUAG	Cleavage
t06991240_x100	MD09G1160600	3	1	24	1773	1796	AAGUGAGUUUUGUGUGGAUGUUUC	:::::::::::::::.: .:.::	UAAACAUCCACACAAAGCCUAUUU	Cleavage
t06991240_x100	MD05G1214900	3	1	24	1542	1565	AAGUGAGUUUUGUGUGGAUGUUUC	:: ::::::::::::::.:.. ::	GACACAUCCACACAAAAUUUGAUU	Cleavage
t06991240_x100	MD05G1117900	3	1	24	405	428	AAGUGAGUUUUGUGUGGAUGUUUC	:::::::.:..::.::::::	UUCACAUCCAUAUGAAGCUCACUG	Cleavage
t06991240_x100	MD13G1010900	3	1	24	63	86	AAGUGAGUUUUGUGUGGAUGUUUC	::: :::: :::::: .::::::	CAAAAAUCCUCACAAAUUUCACUU	Cleavage
t06991240_x100	MD07G1234700	3	1	24	288	311	AAGUGAGUUUUGUGUGGAUGUUUC	::::::: ::::::: ::.::	GUUACAUCCAAACAAAACCCAUUU	Cleavage
t06991240_x100	MD07G1262200	3	1	24	349	372	AAGUGAGUUUUGUGUGGAUGUUUC	::. :: ::::::::::..:::	UAAGGAUGAACACAAAACUUGCUU	Cleavage
t06991240_x100	MD03G1199200	3	1	24	126	149	AAGUGAGUUUUGUGUGGAUGUUUC	:. . ::::...::::::::.::	AAGUUCUCCAUGUAAAACUCAUUU	Cleavage
t06991240_x100	MD10G1096000	3	1	24	450	473	AAGUGAGUUUUGUGUGGAUGUUUC	:..:::.::::.::::::	AUAUAUUUUACAUAAAAUUCACUU	Cleavage
t07833554_x78	MD09G1242900	3	1	22	697	718	UCCUCAUUCUUCGUCUUCCUUC	:.::::.: ::.:::::::::	GGAGGAGGUCGGAGAAUGAGGU	Cleavage
t07833554_x78	MD11G1139900	3	1	22	1108	1129	UCCUCAUUCUUCGUCUUCCUUC	:::::: :.:.::.::::::.	AAAGGAACAUGGAGGAUGAGGG	Cleavage
t07833554_x78	MD03G1121600	3	1	22	1096	1117	UCCUCAUUCUUCGUCUUCCUUC	:::::: :.:.::.::::::.	AAAGGAACAUGGAGGAUGAGGG	Cleavage
t07833554_x78	MD09G1054400	3	1	22	427	448	UCCUCAUUCUUCGUCUUCCUUC	.:::::::.:.::.: :::::	UGAGGAAGAUGGAGGACGAGGA	Cleavage
t07833554_x78	MD17G1007700	3	1	22	353	374	UCCUCAUUCUUCGUCUUCCUUC	.:::::::::::::: ::: :	AGAGGAAGACGAAGAAGGAGAA	Cleavage
t07833554_x78	MD11G1081300	3	1	22	566	587	UCCUCAUUCUUCGUCUUCCUUC	:.. ::.::.:::::::::::	GGGUGAGGAUGAAGAAUGAGGU	Cleavage
t07833554_x78	MD09G1004000	3	1	22	236	256	UCCUCAUUCUUCGUCUUCCUUC	.:::::::::::::: :::::	AGAGGAAGACGAAGAA-GAGGA	Cleavage
t07833554_x78	MD14G1210600	3	1	22	2873	2894	UCCUCAUUCUUCGUCUUCCUUC	.: :::::.::::: ::::::	UGAAGAAGAUGAAGAUUGAGGA	Cleavage
t07833554_x78	MD14G1211000	3	1	22	2931	2952	UCCUCAUUCUUCGUCUUCCUUC	.: :::::.::::: ::::::	UGAAGAAGAUGAAGAUUGAGGA	Cleavage
t07833554_x78	MD09G1177900	3	1	22	382	403	UCCUCAUUCUUCGUCUUCCUUC	:. :::.::::..::.:::::	GGCGGAGGACGGGGAGUGAGGC	Cleavage
t07833554_x78	MD16G1108600	3	1	22	635	656	UCCUCAUUCUUCGUCUUCCUUC	: :::::::.::::::.::	CCAAGAAGACGGAGAAUGGGGU	Cleavage
t07833554_x78	MD03G1169800	3	1	22	617	638	UCCUCAUUCUUCGUCUUCCUUC	:.. :.:: ::::::::::::.	GGGUGGAGUCGAAGAAUGAGGG	Cleavage
t07833554_x78	MD06G1201600	3	1	22	2881	2902	UCCUCAUUCUUCGUCUUCCUUC	: :::::.::::: ::::::	UUAAGAAGAUGAAGAUUGAGGA	Cleavage
t07833554_x78	MD12G1228200	3	1	22	70	91	UCCUCAUUCUUCGUCUUCCUUC	:: .:::::::::: :::::	UCAGAGAGACGAAGAAAGAGGA	Cleavage
t07833554_x78	MD17G1218200	3	1	22	668	689	UCCUCAUUCUUCGUCUUCCUUC	::::.::::.:::::::	UAUUCAAGAUGAAGGAUGAGGA	Cleavage
t07833554_x78	MD17G1218100	3	1	22	668	689	UCCUCAUUCUUCGUCUUCCUUC	::::.::::.:::::::	CCUUCAAGAUGAAGGAUGAGGA	Cleavage
t07833554_x78	MD02G1035300	3	1	22	1251	1272	UCCUCAUUCUUCGUCUUCCUUC	::::.::.:::::::::	AUGAUAAGAUGAGGAAUGAGGA	Cleavage
t08515395_x8579	MD03G1124000	3	1	21	234	254	CACUUGCUCCCCUUCUCCAAC	::: :::::::::::..:::	GUUUGAGAAGGGGAGUGAGUC	Cleavage
t08515395_x8579	MD03G1210100	3	1	21	1700	1720	CACUUGCUCCCCUUCUCCAAC	::::.: :::::::.::::	CUUGGGGUAGGGGAGUAAGUC	Cleavage
t08515395_x8579	MD13G1030400	3	1	21	149	169	CACUUGCUCCCCUUCUCCAAC	: ::::::.: :::::::::	GCUGGAGAGGCGGAGCAAGUU	Translation
t08515395_x8579	MD16G1021100	3	1	21	207	227	CACUUGCUCCCCUUCUCCAAC	: ::::::.: :::::::::	GCUGGAGAGGCGGAGCAAGUU	Translation
t08515395_x8579	MD13G1078900	3	1	21	598	618	CACUUGCUCCCCUUCUCCAAC	::::.:::::::...:::	GGAGGAGGAGGGGAGUGGGUG	Cleavage
t08515395_x8579	MD16G1078600	3	1	21	486	506	CACUUGCUCCCCUUCUCCAAC	::::.:::::::...:::	GGAGGAGGAGGGGAGUGGGUG	Cleavage
t08515395_x8579	MD05G1296700	3	1	21	1607	1627	CACUUGCUCCCCUUCUCCAAC	: :::::::::::.: ..:::	GAUGGAGAAGGGGGGAGGGUG	Cleavage
t08515395_x8579	MD12G1192800	3	1	21	2233	2253	CACUUGCUCCCCUUCUCCAAC	: :: ::::::::::::. ::	GAUGAAGAAGGGGAGCAGAUG	Cleavage
t08515395_x8579	MD04G1163200	3	1	21	1390	1410	CACUUGCUCCCCUUCUCCAAC	:: .::: :::::::::::	CAUGAGGAAUGGGAGCAAGUG	Cleavage
t10036822_x303	MD00G1148400	3	1	21	1064	1084	AAAUGAGCGGAGUGGAAAGAA	:: ::::. ::::::::::::	UUGUUUCUCCUCCGCUCAUUU	Cleavage
t10036822_x303	MD09G1134700	3	1	21	2230	2250	AAAUGAGCGGAGUGGAAAGAA	::::::.:::..:.:::::	GUCUUUCUACUUUGUUCAUUA	Cleavage
t10036822_x303	MD17G1123600	3	1	21	2309	2329	AAAUGAGCGGAGUGGAAAGAA	::::::.:::..:.:::::	GUCUUUCUACUUUGUUCAUUA	Cleavage
t10036822_x303	MD01G1198400	3	1	21	66	86	AAAUGAGCGGAGUGGAAAGAA	:::::.:::::::.:. :::	GUCUUUUCACUCCGUUUCUUU	Cleavage
t10036822_x303	MD14G1243800	3	1	21	20	40	AAAUGAGCGGAGUGGAAAGAA	:::::: :.:..:::.::::	AUCUUUCAAUUUUGCUUAUUU	Cleavage
t10036822_x303	MD14G1121100	3	1	21	3022	3042	AAAUGAGCGGAGUGGAAAGAA	:::: .:::::: :::::::	CUCUUCUCACUCCUCUCAUUU	Cleavage
t10036822_x303	MD05G1214400	3	1	21	1013	1033	AAAUGAGCGGAGUGGAAAGAA	:::..::::::.:.::::	AAAUUUUUACUCCGUUUAUUU	Cleavage
t10036822_x303	MD05G1214800	3	1	21	2852	2872	AAAUGAGCGGAGUGGAAAGAA	:::..::::::.:.::::	AAAUUUUUACUCCGUUUAUUU	Cleavage
t10036822_x303	MD16G1091100	3	1	21	470	490	AAAUGAGCGGAGUGGAAAGAA	.:::::.::.:::: ::::	CCUUUUCCGCUUCGCUGAUUU	Cleavage
t10036822_x303	MD09G1224200	3	1	21	192	212	AAAUGAGCGGAGUGGAAAGAA	:::::::::.::.:. :::	AACUUUCCACUUCGUUUUUUU	Cleavage
t10036822_x303	MD06G1215200	3	1	21	54	74	AAAUGAGCGGAGUGGAAAGAA	: ::: ::::..::::::::	AUAUUUGCACUUUGCUCAUUU	Cleavage
t10036822_x303	MD10G1228200	3	1	21	1249	1269	AAAUGAGCGGAGUGGAAAGAA	::::: .::.::::..:::	CGCUUUCAGCUUCGCUUGUUU	Cleavage
t10036822_x303	MD14G1006500	3	1	21	2239	2259	AAAUGAGCGGAGUGGAAAGAA	::: :::.::: :::::::	AACUUCCCAUUCCACUCAUUU	Cleavage
t10036822_x303	MD14G1197000	3	1	21	679	699	AAAUGAGCGGAGUGGAAAGAA	:: ::::::::::::::	CGCUACCCACUCCGCUCAUUG	Cleavage
t10036822_x303	MD06G1190100	3	1	21	710	730	AAAUGAGCGGAGUGGAAAGAA	:: ::::::::::::::	CGCUACCCACUCCGCUCAUUG	Cleavage
t10212079_x3461	MD11G1002200	3	1	24	128	151	GUUUUUGAAUGGAAGACUCAUGUG	:.: :::::::::::::: ::.:	CGCCUGAGUCUUCCAUUCUAAGAG	Cleavage
t10212079_x3461	MD08G1212000	3	1	24	424	447	GUUUUUGAAUGGAAGACUCAUGUG	::.. ::::::: ::::: :::::	CAUGAGAGUCUUGCAUUCCAAAAC	Cleavage
t10212079_x3461	MD03G1294700	3	1	24	2696	2719	GUUUUUGAAUGGAAGACUCAUGUG	: :.::: :::::::::..:.:.:	CUCGUGAUUCUUCCAUUUGAGAGC	Cleavage
t10212079_x3461	MD16G1062800	3	1	24	1456	1479	GUUUUUGAAUGGAAGACUCAUGUG	::: : :::::::::::::::	GCCAUUACCCUUCCAUUCAAAAAC	Cleavage
t10212079_x3461	MD12G1056500	3	1	24	127	150	GUUUUUGAAUGGAAGACUCAUGUG	:.: :. :.:::.::::.:::::	GAUAAGGAUUUUCUAUUCGAAAAC	Cleavage
t10212079_x3461	MD14G1205900	3	1	24	87	110	GUUUUUGAAUGGAAGACUCAUGUG	:: :. ::::: ::::::::::	ACCACGGUUCUUCGAUUCAAAAAC	Translation
t10212079_x3461	MD07G1225100	3	1	24	608	631	GUUUUUGAAUGGAAGACUCAUGUG	:: :.:::::.::::::.:: :	GACUCGGGUCUUUCAUUCAGAACC	Cleavage
t10212079_x3461	MD03G1237900	3	1	24	467	490	GUUUUUGAAUGGAAGACUCAUGUG	:::.::.:.:::::.:::	ACCCGAAGUUUUUCGUUCAAGAAC	Cleavage
t10212079_x3461	MD01G1202600	3	1	24	139	162	GUUUUUGAAUGGAAGACUCAUGUG	:::.::::::::..:::.	UCUCCAAGUUUUCCAUUCGGAAAU	Cleavage
t10212079_x3461	MD07G1272000	3	1	24	298	321	GUUUUUGAAUGGAAGACUCAUGUG	:::.::::::::..:::.	UCUCCAAGUUUUCCAUUCGGAAAU	Cleavage
t10212079_x3461	MD10G1218300	3	1	24	51	74	GUUUUUGAAUGGAAGACUCAUGUG	::::.::: :::::.:::.	CUUCAGAGUUUUCGAUUCAGAAAU	Translation
t11329296_x5768	MD13G1158900	3	1	21	2293	2313	UAUAUGGAGGGAAAUAUGGUG	.:..::::::..::::::::	UAUUAUAUUUUUCUCCAUAUU	Cleavage
t11329296_x5768	MD17G1197400	3	1	21	818	838	UAUAUGGAGGGAAAUAUGGUG	:: :::::: .::::::::::	CAACAUAUUGUCCUCCAUAUA	Cleavage
t11329296_x5768	MD00G1201000	3	1	21	1481	1501	UAUAUGGAGGGAAAUAUGGUG	:: :::::: .::::::::::	CAACAUAUUGUCCUCCAUAUA	Cleavage
t11329296_x5768	MD05G1358400	3	1	21	2648	2668	UAUAUGGAGGGAAAUAUGGUG	:...:.:::::::::::::	GAUUGUGUUUCCCUCCAUAUC	Cleavage
t11329296_x5768	MD03G1292800	3	1	21	434	454	UAUAUGGAGGGAAAUAUGGUG	:.::::: :::::: :::::.	CGCCAUACUUCCCUGCAUAUG	Cleavage
t11329296_x5768	MD07G1220100	3	1	21	708	728	UAUAUGGAGGGAAAUAUGGUG	.::::: : ::::::.:::::	UACCAUCUCUCCCUCUAUAUA	Cleavage
t11329296_x5768	MD05G1050600	3	1	21	159	179	UAUAUGGAGGGAAAUAUGGUG	: :..:.:::.:::::::::	CUCUGUGUUUUCCUCCAUAUU	Cleavage
t11329296_x5768	MD07G1263500	3	1	21	68	88	UAUAUGGAGGGAAAUAUGGUG	: .:.:::::.:::::: :::	CUUCGUAUUUUCCUCCAAAUA	Cleavage
t11329296_x5768	MD02G1048700	3	1	21	514	534	UAUAUGGAGGGAAAUAUGGUG	..:::::..:::::::::	GUAUGUAUUUUUCUCCAUAUA	Cleavage
t11329296_x5768	MD01G1040300	3	1	21	1087	1107	UAUAUGGAGGGAAAUAUGGUG	:::::::::::::: :: :	UUCCAUAUUUCCCUCCCUAAA	Cleavage
t11329296_x5768	MD09G1193100	3	1	21	2677	2697	UAUAUGGAGGGAAAUAUGGUG	:. :: :::::::.::::::	GAUGAUCUUUCCCUUCAUAUA	Cleavage
t11329296_x5768	MD01G1214600	3	1	21	25	45	UAUAUGGAGGGAAAUAUGGUG	: ::: ::::::::::::. :	CCCCAAAUUUCCCUCCAUGAA	Cleavage
t11329296_x5768	MD07G1284300	3	1	21	102	122	UAUAUGGAGGGAAAUAUGGUG	: ::: ::::::::::::. :	CCCCAAAUUUCCCUCCAUGAA	Cleavage
t11329296_x5768	MD13G1231000	3	1	21	1511	1531	UAUAUGGAGGGAAAUAUGGUG	: ::: ::::::.:::: :::	CUCCAAAUUUCCUUCCACAUA	Cleavage
t11329296_x5768	MD08G1069300	3	1	21	1301	1321	UAUAUGGAGGGAAAUAUGGUG	: ::: :::::..:.:.::::	CCCCAAAUUUCUUUUCGUAUA	Cleavage
t11329296_x5768	MD09G1085300	3	1	21	2026	2046	UAUAUGGAGGGAAAUAUGGUG	: .:: :::::::::..:::.	CUUCAGAUUUCCCUCUGUAUG	Cleavage
t11329296_x5768	MD04G1160300	3	1	21	1074	1094	UAUAUGGAGGGAAAUAUGGUG	.:. ::::::::::::::	UCUCGCAUUUCCCUCCAUAUC	Cleavage
t11329296_x5768	MD03G1157000	3	1	21	5695	5715	UAUAUGGAGGGAAAUAUGGUG	: : ::::::::.::.::.:.	CCCAAUAUUUCCUUCUAUGUG	Cleavage
t11329296_x5768	MD07G1122300	3	1	21	1515	1535	UAUAUGGAGGGAAAUAUGGUG	::.: ::::.::::.:.::	UUCCGUUUUUCUCUCCGUGUA	Cleavage
t11329296_x5768	MD12G1197900	3	1	21	47	67	UAUAUGGAGGGAAAUAUGGUG	.:. ::::::.::::::::	AGCUUGAUUUCCUUCCAUAUA	Cleavage

## Sheet: 420 targets de 17 DE-miRNAs
miRNA_Acc.	Target_Acc.
ath-miR858b	MD09G1183800
ath-miR858b	MD04G1060200
ath-miR858b	MD06G1053100
ath-miR858b	MD15G1051000
ath-miR858b	MD15G1215500
ath-miR858b	MD09G1184000
ath-miR858b	MD02G1087900
ath-miR858b	MD14G1134900
ath-miR858b	MD01G1084400
ath-miR858b	MD15G1050300
ath-miR858b	MD00G1092300
ath-miR858b	MD02G1087500
ath-miR858b	MD15G1051400
ath-miR858b	MD05G1243900
ath-miR858b	MD10G1225800
ath-miR858b	MD02G1312700
ath-miR858b	MD08G1070700
ath-miR858b	MD07G1010500
ath-miR858b	MD01G1144700
ath-miR858b	MD16G1119800
ath-miR858b	MD14G1012300
ath-miR858b	MD07G1277000
ath-miR858b	MD08G1070900
ath-miR858b	MD01G1031700
ath-miR858b	MD15G1323500
ath-miR858b	MD16G1028800
ath-miR858b	MD15G1302300
ath-miR858b	MD02G1191000
ath-miR858b	MD15G1215100
ath-miR858b	MD15G1215400
ath-miR858b	MD11G1216000
ath-miR858b	MD04G1229400
ath-miR858b	MD06G1098100
ath-miR858b	MD05G1318100
ath-miR858b	MD01G1174900
ath-miR858b	MD08G1206600
ath-miR858b	MD15G1390100
ath-miR858b	MD10G1184100
ath-miR858b	MD05G1197600
ath-miR858b	MD15G1369700
ath-miR858b	MD08G1183100
ath-miR858b	MD05G1105600
ath-miR858b	MD17G1279200
ath-miR858b	MD09G1286900
ath-miR858b	MD13G1026400
ath-miR858b	MD10G1205400
ath-miR858b	MD16G1029400
ath-miR858b	MD07G1211300
ath-miR858b	MD11G1215600
ath-miR858b	MD00G1065700
ath-miR858b	MD16G1271400
ath-miR858b	MD09G1073600
ath-miR858b	MD06G1089700
ath-miR858b	MD09G1191100
ath-miR858b	MD14G1227500
ath-miR858b	MD16G1158800
ath-miR858b	MD17G1173700
ath-miR858b	MD17G1086000
ath-miR858b	MD14G1172900
ath-miR858b	MD06G1217200
ath-miR858b	MD12G1198600
ath-miR858b	MD04G1184900
mdm-miR159aMIMAT0025898	MD11G1215600
mdm-miR159aMIMAT0025898	MD00G1058800
mdm-miR159aMIMAT0025898	MD07G1101000
mdm-miR159aMIMAT0025898	MD11G1216000
mdm-miR159aMIMAT0025898	MD07G1085000
mdm-miR159aMIMAT0025898	MD02G1269700
mdm-miR159aMIMAT0025898	MD02G1242500
mdm-miR159aMIMAT0025898	MD07G1074000
mdm-miR159aMIMAT0025898	MD04G1177800
mdm-miR159aMIMAT0025898	MD02G1259600
mdm-miR159aMIMAT0025898	MD17G1084700
mdm-miR159aMIMAT0025898	MD01G1178100
mdm-miR159aMIMAT0025898	MD14G1210400
mdm-miR159aMIMAT0025898	MD06G1200700
mdm-miR159aMIMAT0025898	MD00G1007700
mdm-miR159aMIMAT0025898	MD15G1151800
mdm-miR159aMIMAT0025898	MD05G1018900
mdm-miR159aMIMAT0025898	MD12G1193400
mdm-miR159aMIMAT0025898	MD04G1069600
mdm-miR159aMIMAT0025898	MD11G1267200
mdm-miR159aMIMAT0025898	MD02G1084600
mdm-miR164cMIMAT0025909	MD14G1203000
mdm-miR164cMIMAT0025909	MD06G1196100
mdm-miR164cMIMAT0025909	MD11G1253500
mdm-miR164cMIMAT0025909	MD10G1198400
mdm-miR164cMIMAT0025909	MD03G1190400
mdm-miR164cMIMAT0025909	MD17G1051600
mdm-miR164cMIMAT0025909	MD11G1316400
mdm-miR164cMIMAT0025909	MD09G1053700
mdm-miR164cMIMAT0025909	MD04G1022200
mdm-miR164cMIMAT0025909	MD01G1125200
mdm-miR164cMIMAT0025909	MD15G1216000
mdm-miR164cMIMAT0025909	MD16G1277100
mdm-miR164cMIMAT0025909	MD03G1296800
mdm-miR164cMIMAT0025909	MD04G1089900
mdm-miR164cMIMAT0025909	MD00G1093600
mdm-miR164cMIMAT0025909	MD10G1197800
mdm-miR164cMIMAT0025909	MD10G1270900
mdm-miR164cMIMAT0025909	MD10G1270700
mdm-miR164cMIMAT0025909	MD05G1085700
mdm-miR164cMIMAT0025909	MD11G1080800
mdm-miR164cMIMAT0025909	MD08G1182700
mdm-miR164cMIMAT0025909	MD00G1142400
mdm-miR164cMIMAT0025909	MD17G1235600
mdm-miR164cMIMAT0025909	MD02G1088800
mdm-miR171bMIMAT0025939	MD07G1115800
mdm-miR171bMIMAT0025939	MD02G1210200
mdm-miR171bMIMAT0025939	MD04G1088100
mdm-miR171bMIMAT0025939	MD00G1043300
mdm-miR171bMIMAT0025939	MD05G1032800
mdm-miR171bMIMAT0025939	MD16G1126200
mdm-miR171bMIMAT0025939	MD05G1139800
mdm-miR171bMIMAT0025939	MD14G1102200
mdm-miR171bMIMAT0025939	MD12G1179300
mdm-miR171bMIMAT0025939	MD14G1197800
mdm-miR171bMIMAT0025939	MD00G1186200
mdm-miR171bMIMAT0025939	MD06G1191400
mdm-miR171bMIMAT0025939	MD10G1221600
mdm-miR171bMIMAT0025939	MD10G1223100
mdm-miR171bMIMAT0025939	MD14G1067400
mdm-miR171bMIMAT0025939	MD01G1214500
mdm-miR171bMIMAT0025939	MD09G1139300
mdm-miR171bMIMAT0025939	MD16G1175200
mdm-miR171bMIMAT0025939	MD17G1236400
mdm-miR171bMIMAT0025939	MD10G1100300
mdm-miR390eMIMAT0025973	MD13G1074300
mdm-miR390eMIMAT0025973	MD03G1267800
mdm-miR390eMIMAT0025973	MD16G1148700
mdm-miR390eMIMAT0025973	MD04G1039800
mdm-miR390eMIMAT0025973	MD05G1190800
mdm-miR390eMIMAT0025973	MD00G1124100
mdm-miR390eMIMAT0025973	MD00G1124500
mdm-miR390eMIMAT0025973	MD04G1006600
mdm-miR390eMIMAT0025973	MD00G1170400
mdm-miR390eMIMAT0025973	MD00G1170700
mdm-miR390eMIMAT0025973	MD00G1009600
mdm-miR390eMIMAT0025973	MD05G1190400
mdm-miR390eMIMAT0025973	MD00G1124700
mdm-miR390eMIMAT0025973	MD00G1124700
mdm-miR390eMIMAT0025973	MD14G1017600
mdm-miR390eMIMAT0025973	MD00G1066800
mdm-miR390eMIMAT0025973	MD08G1159600
mdm-miR390eMIMAT0025973	MD16G1063500
mdm-miR390eMIMAT0025973	MD13G1065200
mdm-miR390eMIMAT0025973	MD16G1148700
mdm-miR390eMIMAT0025973	MD11G1251700
mdm-miR390eMIMAT0025973	MD03G1044500
mdm-miR390eMIMAT0025973	MD00G1170400
mdm-miR390eMIMAT0025973	MD13G1148600
mdm-miR390eMIMAT0025973	MD00G1006500
mdm-miR390eMIMAT0025973	MD10G1273200
mdm-miR390eMIMAT0025973	MD10G1322900
mdm-miR390eMIMAT0025973	MD07G1165400
mdm-miR390eMIMAT0025973	MD11G1269700
mdm-miR390eMIMAT0025973	MD00G1030600
mdm-miR390eMIMAT0025973	MD10G1061600
mdm-miR390eMIMAT0025973	MD08G1047600
mdm-miR390eMIMAT0025973	MD09G1171000
mdm-miR390eMIMAT0025973	MD17G1155900
mdm-miR390eMIMAT0025973	MD09G1232100
mdm-miR390eMIMAT0025973	MD17G1209500
mdm-miR390eMIMAT0025973	MD16G1222000
mdm-miR390eMIMAT0025973	MD12G1263300
mdm-miR390eMIMAT0025973	MD15G1228300
mdm-miR482bMIMAT0026022	MD03G1034100
mdm-miR482bMIMAT0026022	MD07G1269600
mdm-miR482bMIMAT0026022	MD03G1034300
mdm-miR482bMIMAT0026022	MD15G1046900
mdm-miR482bMIMAT0026022	MD08G1098600
mdm-miR482bMIMAT0026022	MD11G1063900
mdm-miR482bMIMAT0026022	MD11G1064900
mdm-miR482bMIMAT0026022	MD08G1043000
mdm-miR482bMIMAT0026022	MD11G1063800
mdm-miR482bMIMAT0026022	MD15G1042600
mdm-miR482bMIMAT0026022	MD07G1025200
mdm-miR482bMIMAT0026022	MD00G1161500
mdm-miR482bMIMAT0026022	MD09G1258800
mdm-miR482bMIMAT0026022	MD17G1205000
mdm-miR482bMIMAT0026022	MD17G1205300
mdm-miR482bMIMAT0026022	MD17G1204800
mdm-miR482bMIMAT0026022	MD06G1024500
mdm-miR482bMIMAT0026022	MD08G1104200
mdm-miR482bMIMAT0026022	MD05G1138500
mdm-miR482bMIMAT0026022	MD08G1096800
mdm-miR482bMIMAT0026022	MD08G1094300
mdm-miR482bMIMAT0026022	MD09G1055800
mdm-miR482bMIMAT0026022	MD08G1097100
mdm-miR482bMIMAT0026022	MD08G1093300
mdm-miR482bMIMAT0026022	MD08G1099900
mdm-miR482bMIMAT0026022	MD03G1045400
mdm-miR482bMIMAT0026022	MD10G1006800
mdm-miR482bMIMAT0026022	MD10G1006400
mdm-miR482bMIMAT0026022	MD08G1129500
mdm-miR482bMIMAT0026022	MD06G1024300
mdm-miR482bMIMAT0026022	MD00G1072900
mdm-miR482bMIMAT0026022	MD00G1120900
mdm-miR482bMIMAT0026022	MD03G1072200
mdm-miR482bMIMAT0026022	MD11G1078500
mdm-miR482bMIMAT0026022	MD11G1078300
mdm-miR482bMIMAT0026022	MD00G1121200
mdm-miR482bMIMAT0026022	MD00G1120600
mdm-miR482bMIMAT0026022	MD11G1078100
mdm-miR482bMIMAT0026022	MD11G1077700
mdm-miR482bMIMAT0026022	MD11G1077200
mdm-miR482bMIMAT0026022	MD07G1150400
mdm-miR482bMIMAT0026022	MD01G1082000
mdm-miR482bMIMAT0026022	MD11G1077900
mdm-miR482bMIMAT0026022	MD11G1020200
mdm-miR482bMIMAT0026022	MD12G1180400
mdm-miR482bMIMAT0026022	MD17G1224100
mdm-miR482bMIMAT0026022	MD11G1020500
mdm-miR482bMIMAT0026022	MD11G1019800
mdm-miR482bMIMAT0026022	MD11G1054600
mdm-miR482bMIMAT0026022	MD03G1034200
mdm-miR482bMIMAT0026022	MD05G1022400
mdm-miR482bMIMAT0026022	MD03G1006200
mdm-miR482bMIMAT0026022	MD11G1064300
mdm-miR482bMIMAT0026022	MD17G1224600
mdm-miR482bMIMAT0026022	MD09G1225800
mdm-miR482bMIMAT0026022	MD15G1035600
mdm-miR482bMIMAT0026022	MD17G1025700
mdm-miR482bMIMAT0026022	MD08G1056600
mdm-miR482bMIMAT0026022	MD08G1128800
mdm-miR482bMIMAT0026022	MD10G1135300
mdm-miR482bMIMAT0026022	MD11G1070100
mdm-miR482bMIMAT0026022	MD05G1078200
mdm-miR482bMIMAT0026022	MD05G1019100
mdm-miR482bMIMAT0026022	MD07G1127000
mdm-miR482bMIMAT0026022	MD05G1257400
mdm-miR482bMIMAT0026022	MD05G1008000
mdm-miR482bMIMAT0026022	MD11G1066900
mdm-miR482bMIMAT0026022	MD02G1314300
mdm-miR482bMIMAT0026022	MD14G1006500
mdm-miR482bMIMAT0026022	MD08G1001700
mdm-miR482bMIMAT0026022	MD15G1001000
mdm-miR482bMIMAT0026022	MD17G1145900
mdm-miR482bMIMAT0026022	MD09G1160100
mdm-miR482cMIMAT0026023	MD03G1034100
mdm-miR482cMIMAT0026023	MD03G1034300
mdm-miR482cMIMAT0026023	MD04G1238000
mdm-miR482cMIMAT0026023	MD01G1197400
mdm-miR482cMIMAT0026023	MD07G1269600
mdm-miR482cMIMAT0026023	MD14G1072500
mdm-miR482cMIMAT0026023	MD12G1256300
mdm-miR482cMIMAT0026023	MD15G1066400
mdm-miR482cMIMAT0026023	MD10G1036400
mdm-miR482cMIMAT0026023	MD07G1075300
mdm-miR482cMIMAT0026023	MD05G1065100
mdm-miR482cMIMAT0026023	MD11G1157100
mdm-miR482cMIMAT0026023	MD12G1138300
mdm-miR482cMIMAT0026023	MD06G1019800
mdm-miR482cMIMAT0026023	MD13G1094100
mdm-miR5225cMIMAT0026052	MD05G1230100
mdm-miR5225cMIMAT0026052	MD06G1002400
mdm-miR5225cMIMAT0026052	MD16G1197500
mdm-miR5225cMIMAT0026052	MD13G1241000
mdm-miR5225cMIMAT0026052	MD16G1246100
mdm-miR5225cMIMAT0026052	MD02G1297200
mdm-miR5225cMIMAT0026052	MD15G1157600
mdm-miR5225cMIMAT0026052	MD10G1006400
mdm-miR5225cMIMAT0026052	MD10G1006800
mdm-miR7121cMIMAT0026042	MD02G1023700
mdm-miR7121cMIMAT0026042	MD02G1024300
mdm-miR7121cMIMAT0026042	MD02G1024300
mdm-miR7121cMIMAT0026042	MD10G1176800
mdm-miR7121cMIMAT0026042	MD14G1007700
mdm-miR7121cMIMAT0026042	MD11G1201000
mdm-miR7121cMIMAT0026042	MD02G1307800
mdm-miR7121cMIMAT0026042	MD07G1017800
mdm-miR7121eMIMAT0026044	MD02G1023700
mdm-miR7121eMIMAT0026044	MD02G1024300
mdm-miR7121eMIMAT0026044	MD09G1223600
mdm-miR7121eMIMAT0026044	MD02G1024300
mdm-miR7121eMIMAT0026044	MD11G1201000
mdm-miR7121eMIMAT0026044	MD10G1176800
mdm-miR7121eMIMAT0026044	MD14G1007700
mdm-miR858MIMAT0026070	MD09G1183800
mdm-miR858MIMAT0026070	MD04G1060200
mdm-miR858MIMAT0026070	MD06G1053100
mdm-miR858MIMAT0026070	MD15G1051000
mdm-miR858MIMAT0026070	MD15G1215500
mdm-miR858MIMAT0026070	MD09G1184000
mdm-miR858MIMAT0026070	MD02G1087900
mdm-miR858MIMAT0026070	MD01G1084400
mdm-miR858MIMAT0026070	MD14G1134900
mdm-miR858MIMAT0026070	MD15G1051400
mdm-miR858MIMAT0026070	MD15G1050300
mdm-miR858MIMAT0026070	MD00G1092300
mdm-miR858MIMAT0026070	MD02G1087500
mdm-miR858MIMAT0026070	MD05G1243900
mdm-miR858MIMAT0026070	MD10G1225800
mdm-miR858MIMAT0026070	MD02G1312700
mdm-miR858MIMAT0026070	MD08G1070700
mdm-miR858MIMAT0026070	MD07G1010500
mdm-miR858MIMAT0026070	MD01G1144700
mdm-miR858MIMAT0026070	MD08G1070900
mdm-miR858MIMAT0026070	MD15G1302300
mdm-miR858MIMAT0026070	MD02G1191000
mdm-miR858MIMAT0026070	MD15G1215400
mdm-miR858MIMAT0026070	MD01G1031700
mdm-miR858MIMAT0026070	MD16G1028800
mdm-miR858MIMAT0026070	MD15G1323500
mdm-miR858MIMAT0026070	MD14G1012300
mdm-miR858MIMAT0026070	MD16G1119800
mdm-miR858MIMAT0026070	MD07G1277000
mdm-miR858MIMAT0026070	MD04G1229400
mdm-miR858MIMAT0026070	MD15G1215100
mdm-miR858MIMAT0026070	MD11G1216000
mdm-miR858MIMAT0026070	MD10G1184100
mdm-miR858MIMAT0026070	MD05G1197600
mdm-miR858MIMAT0026070	MD13G1026400
mdm-miR858MIMAT0026070	MD10G1205400
mdm-miR858MIMAT0026070	MD16G1029400
mdm-miR858MIMAT0026070	MD07G1211300
mdm-miR858MIMAT0026070	MD08G1206600
mdm-miR858MIMAT0026070	MD15G1390100
mdm-miR858MIMAT0026070	MD05G1318100
mdm-miR858MIMAT0026070	MD06G1098100
mdm-miR858MIMAT0026070	MD00G1065700
mdm-miR858MIMAT0026070	MD09G1073600
mdm-miR858MIMAT0026070	MD16G1271400
mdm-miR858MIMAT0026070	MD17G1279200
mdm-miR858MIMAT0026070	MD09G1286900
mdm-miR858MIMAT0026070	MD06G1089700
mdm-miR858MIMAT0026070	MD09G1191100
mdm-miR858MIMAT0026070	MD14G1227500
mdm-miR858MIMAT0026070	MD16G1158800
mdm-miR858MIMAT0026070	MD17G1173700
mdm-miR858MIMAT0026070	MD17G1086000
mdm-miR858MIMAT0026070	MD14G1172900
mdm-miR858MIMAT0026070	MD06G1217200
mdm-miR858MIMAT0026070	MD11G1215600
mdm-miR858MIMAT0026070	MD12G1198600
mdm-miR858MIMAT0026070	MD04G1184900
mdm-miR858MIMAT0026070	MD01G1174900
mdm-miR858MIMAT0026070	MD15G1369700
mdm-miR858MIMAT0026070	MD08G1183100
mdm-miR858MIMAT0026070	MD05G1105600
mtr-miR4414a-5p	MD12G1100900
mtr-miR4414a-5p	MD04G1207400
mtr-miR4414a-5p	MD11G1213500
mtr-miR4414a-5p	MD15G1233700
mtr-miR4414a-5p	MD13G1157500
mtr-miR4414a-5p	MD10G1124500
mtr-miR4414a-5p	MD14G1187400
peu-miR2910	MD10G1068600
peu-miR2910	MD05G1060800
peu-miR2910	MD13G1103700
peu-miR2910	MD13G1104100
peu-miR2910	MD09G1069300
peu-miR2910	MD10G1216700
peu-miR2910	MD05G1238400
peu-miR2910	MD02G1109000
peu-miR2910	MD17G1017400
peu-miR2910	MD10G1085400
peu-miR2910	MD05G1070800
peu-miR2910	MD09G1205400
peu-miR2910	MD15G1344300
peu-miR2910	MD01G1196600
peu-miR2910	MD05G1178400
peu-miR2910	MD07G1263500
peu-miR2910	MD12G1162000
peu-miR2910	MD12G1023500
ptc-miR159d	MD11G1215600
ptc-miR159d	MD00G1058800
ptc-miR159d	MD07G1101000
ptc-miR159d	MD11G1216000
ptc-miR159d	MD02G1242500
ptc-miR159d	MD07G1074000
ptc-miR159d	MD07G1085000
ptc-miR159d	MD02G1269700
ptc-miR159d	MD04G1177800
ptc-miR159d	MD02G1259600
ptc-miR159d	MD17G1084700
ptc-miR159d	MD01G1178100
ptc-miR159d	MD14G1210400
ptc-miR159d	MD06G1200700
ptc-miR159d	MD00G1007700
ptc-miR159d	MD15G1151800
ptc-miR159d	MD05G1018900
ptc-miR159d	MD12G1193400
ptc-miR159d	MD02G1084600
ptc-miR159d	MD04G1069600
ptc-miR159d	MD11G1267200
sit-miR05-npr	MD17G1185400
sit-miR05-npr	MD09G1205400
sit-miR05-npr	MD15G1092200
sit-miR05-npr	MD05G1273700
sit-miR05-npr	MD08G1112900
sit-miR05-npr	MD10G1253500
sit-miR05-npr	MD11G1136800
sit-miR05-npr	MD03G1118500
sit-miR05-npr	MD15G1443800
sit-miR05-npr	MD01G1173800
sit-miR05-npr	MD14G1021600
sit-miR05-npr	MD14G1017300
sit-miR05-npr	MD04G1172900
sit-miR05-npr	MD06G1010000
sit-miR05-npr	MD11G1246700
sit-miR05-npr	MD17G1122600
sit-miR05-npr	MD07G1128700
t00205877_x43290	MD17G1245800
t00205877_x43290	MD06G1241200
t00205877_x43290	MD03G1222900
t00205877_x43290	MD09G1032400
t00205877_x43290	MD05G1137900
t08515395_x8579	MD13G1139300
t08515395_x8579	MD15G1152700
t08515395_x8579	MD11G1247100
t08515395_x8579	MD03G1124000
t08515395_x8579	MD03G1210100
t08515395_x8579	MD13G1030400
t08515395_x8579	MD16G1021100
t08515395_x8579	MD13G1078900
t08515395_x8579	MD16G1078600
t08515395_x8579	MD05G1296700
t08515395_x8579	MD12G1192800
t08515395_x8579	MD04G1163200

## Sheet: 319 Unique targets
Target_Acc.	Annotation
MD00G1006500	Symbols: | Leucine-rich repeat transmembrane protein kinase | chr3:4988271-4993891 FORWARD LENGTH=1020
MD00G1007700	Symbols: BEH4 | BES1/BZR1 homolog 4 | chr1:29599854-29601539 FORWARD LENGTH=325
MD00G1009600	Symbols: | Leucine-rich receptor-like protein kinase family protein | chr1:5891375-5894855 FORWARD LENGTH=1101
MD00G1030600	Symbols: CLC-C, ATCLC-C | chloride channel C | chr5:20288489-20292143 REVERSE LENGTH=779
MD00G1043300	Symbols: HAM3, ATHAM3, LOM3 | GRAS family transcription factor | chr4:57429-59105 REVERSE LENGTH=558
MD00G1058800	Symbols: DUO1 | myb-like HTH transcriptional regulator family protein | chr3:22342429-22343491 REVERSE LENGTH=297
MD00G1065700	Symbols: ATMYB102, ATM4, MYB102 | MYB-like 102 | chr4:11418425-11419652 REVERSE LENGTH=350
MD00G1066800	Symbols: | ribosome-binding factor A family protein | chr4:16570019-16571274 REVERSE LENGTH=215
MD00G1072900	Symbols: | NB-ARC domain-containing disease resistance protein | chr3:4857940-4861104 FORWARD LENGTH=1054
MD00G1092300	Symbols: WER, ATMYB66, WER1, MYB66 | myb domain protein 66 | chr5:4763656-4764738 REVERSE LENGTH=203
MD00G1093600	Symbols: | GDSL-like Lipase/Acylhydrolase superfamily protein | chr5:18528600-18530164 FORWARD LENGTH=362
MD00G1120600	Symbols: | NB-ARC domain-containing disease resistance protein | chr3:4857940-4861104 FORWARD LENGTH=1054
MD00G1120900	Symbols: | NB-ARC domain-containing disease resistance protein | chr3:4857940-4861104 FORWARD LENGTH=1054
MD00G1121200	Symbols: | NB-ARC domain-containing disease resistance protein | chr3:4857940-4861104 FORWARD LENGTH=1054
MD00G1124100	Symbols: | Leucine-rich repeat receptor-like protein kinase family protein | chr2:14056371-14059829 REVERSE LENGTH=1124
MD00G1124500	Symbols: | Leucine-rich repeat receptor-like protein kinase family protein | chr4:5636693-5640496 REVERSE LENGTH=1045
MD00G1124700	Symbols: | Leucine-rich repeat receptor-like protein kinase family protein | chr4:5636693-5640496 REVERSE LENGTH=1045
MD00G1142400	Symbols: AtGRF5, GRF5 | growth-regulating factor 5 | chr3:4608526-4610160 FORWARD LENGTH=397
MD00G1161500	#N/A
MD00G1170400	Symbols: | Leucine-rich repeat receptor-like protein kinase family protein | chr4:5636693-5640496 REVERSE LENGTH=1045
MD00G1170700	Symbols: | Leucine-rich repeat receptor-like protein kinase family protein | chr4:5636693-5640496 REVERSE LENGTH=1045
MD00G1186200	Symbols: ATEB1B, ATEB1, EB1B | end binding protein 1B | chr5:25092929-25095006 FORWARD LENGTH=293
MD01G1031700	Symbols: AtMYB93, MYB93 | myb domain protein 93 | chr1:12709128-12710423 FORWARD LENGTH=365
MD01G1082000	Symbols: | Protein with RING/U-box and TRAF-like domains | chr3:22871974-22873543 REVERSE LENGTH=326
MD01G1084400	Symbols: MYB7, ATMYB7, ATY49 | myb domain protein 7 | chr2:7255669-7256550 REVERSE LENGTH=269
MD01G1125200	Symbols: UXS5 | UDP-XYL synthase 5 | chr3:17089268-17091611 REVERSE LENGTH=341
MD01G1144700	Symbols: MYB109, AtMYB109 | myb domain protein 109 | chr3:20682114-20683963 REVERSE LENGTH=399
MD01G1173800	Symbols: | Transducin family protein / WD-40 repeat family protein | chr5:9529603-9531081 REVERSE LENGTH=466
MD01G1174900	Symbols: ZCF125 | P-loop containing nucleoside triphosphate hydrolases superfamily protein | chr1:21874083-21879382 FORWARD LENGTH=823
MD01G1178100	Symbols: DUO1 | myb-like HTH transcriptional regulator family protein | chr3:22342429-22343491 REVERSE LENGTH=297
MD01G1196600	Symbols: LBD24 | LOB domain-containing protein 24 | chr3:9797136-9797610 REVERSE LENGTH=121
MD01G1197400	Symbols: | S-adenosyl-L-methionine-dependent methyltransferases superfamily protein | chr4:314405-317507 FORWARD LENGTH=633
MD01G1214500	Symbols: CRF4 | cytokinin response factor 4 | chr4:13909732-13910739 REVERSE LENGTH=335
MD02G1023700	#N/A
MD02G1024300	#N/A
MD02G1084600	Symbols: ABI2, AtABI2 | Protein phosphatase 2C family protein | chr5:23087720-23089303 FORWARD LENGTH=383
MD02G1087500	Symbols: WER, ATMYB66, WER1, MYB66 | myb domain protein 66 | chr5:4763656-4764738 REVERSE LENGTH=203
MD02G1087900	Symbols: TT2, ATMYB123, MYB123, ATTT2 | Duplicated homeodomain-like superfamily protein | chr5:13726807-13727729 FORWARD LENGTH=258
MD02G1088800	Symbols: AtGRF5, GRF5 | growth-regulating factor 5 | chr3:4608526-4610160 FORWARD LENGTH=397
MD02G1109000	Symbols: PIRL5 | plant intracellular ras group-related LRR 5 | chr2:7571331-7573406 FORWARD LENGTH=526
MD02G1191000	Symbols: RAX3, MYB84, ATMYB84 | myb domain protein 84 | chr3:18427941-18429100 FORWARD LENGTH=310
MD02G1210200	Symbols: HAM3, ATHAM3, LOM3 | GRAS family transcription factor | chr4:57429-59105 REVERSE LENGTH=558
MD02G1242500	Symbols: | Galactose oxidase/kelch repeat superfamily protein | chr5:1246867-1249455 REVERSE LENGTH=514
MD02G1259600	Symbols: | Glycosyl hydrolase family protein | chr5:1423369-1426628 FORWARD LENGTH=665
MD02G1269700	Symbols: ATMYB65, MYB65 | myb domain protein 65 | chr3:3603056-3604929 FORWARD LENGTH=553
MD02G1297200	Symbols: | unknown protein; BEST Arabidopsis thaliana protein match is: unknown protein (TAIR:AT3G51940.1); Has 30201 Blast hits to 17322 proteins in 780 species: Archae - 12; Bacteria - 1396; Metazoa - 17338; Fungi - 3422; Plants - 5037; Viruses - 0; Other Eukaryotes - 2996 (source: NCBI BLink). | chr5:1075957-1077358 FORWARD LENGTH=302
MD02G1307800	Symbols: RLF | reduced lateral root formation | chr5:2999362-3000185 REVERSE LENGTH=211
MD02G1312700	Symbols: MYB83, AtMYB83 | myb domain protein 83 | chr3:2576958-2578072 REVERSE LENGTH=343
MD02G1314300	Symbols: | NB-ARC domain-containing disease resistance protein | chr3:4857940-4861104 FORWARD LENGTH=1054
MD03G1006200	Symbols: | NB-ARC domain-containing disease resistance protein | chr3:4857940-4861104 FORWARD LENGTH=1054
MD03G1034100	#N/A
MD03G1034200	#N/A
MD03G1034300	Symbols: ANT, DRG, CKC, CKC1 | Integrase-type DNA-binding superfamily protein | chr4:17739782-17742189 FORWARD LENGTH=555
MD03G1044500	Symbols: BRL1 | BRI1 like | chr1:20779874-20783374 REVERSE LENGTH=1166
MD03G1045400	Symbols: | NB-ARC domain-containing disease resistance protein | chr3:4857940-4861104 FORWARD LENGTH=1054
MD03G1072200	Symbols: | NB-ARC domain-containing disease resistance protein | chr3:4857940-4861104 FORWARD LENGTH=1054
MD03G1118500	Symbols: REV, IFL, IFL1 | Homeobox-leucine zipper family protein / lipid-binding START domain-containing protein | chr5:24397734-24401933 FORWARD LENGTH=842
MD03G1124000	Symbols: CPN60A, CH-CPN60A, SLP | chaperonin-60alpha | chr2:11926603-11929184 FORWARD LENGTH=586
MD03G1190400	Symbols: SHV3, MRH5, GPDL2 | PLC-like phosphodiesterase family protein | chr4:13456793-13459890 REVERSE LENGTH=759
MD03G1210100	Symbols: THI1, TZ, THI4 | thiazole biosynthetic enzyme, chloroplast (ARA6) (THI1) (THI4) | chr5:22246634-22247891 FORWARD LENGTH=349
MD03G1222900	Symbols: | ABC-2 type transporter family protein | chr4:13712434-13714797 REVERSE LENGTH=638
MD03G1267800	Symbols: | SNARE associated Golgi protein family | chr1:795678-798102 REVERSE LENGTH=274
MD03G1296800	Symbols: | Late embryogenesis abundant protein (LEA) family protein | chr3:23146931-23147735 FORWARD LENGTH=213
MD04G1006600	Symbols: | Leucine-rich repeat receptor-like protein kinase family protein | chr4:5636693-5640496 REVERSE LENGTH=1045
MD04G1022200	Symbols: AtPRD1, PRD1 | putative recombination initiation defect 1 | chr4:8178330-8183515 FORWARD LENGTH=1268
MD04G1039800	Symbols: AtRLP53, RLP53 | receptor like protein 53 | chr5:9522534-9525407 REVERSE LENGTH=957
MD04G1060200	Symbols: WER, ATMYB66, WER1, MYB66 | myb domain protein 66 | chr5:4763656-4764738 REVERSE LENGTH=203
MD04G1069600	Symbols: PLDBETA1, PLDBETA | phospholipase D beta 1 | chr2:17533018-17537990 REVERSE LENGTH=1083
MD04G1088100	Symbols: HAM3, ATHAM3, LOM3 | GRAS family transcription factor | chr4:57429-59105 REVERSE LENGTH=558
MD04G1089900	Symbols: | Late embryogenesis abundant protein (LEA) family protein | chr3:23146931-23147735 FORWARD LENGTH=213
MD04G1163200	Symbols: LECRKA4.2 | lectin receptor kinase a4.1 | chr5:214517-216583 REVERSE LENGTH=688
MD04G1172900	Symbols: | unknown protein; FUNCTIONS IN: molecular_function unknown; INVOLVED IN: response to oxidative stress; LOCATED IN: endomembrane system; EXPRESSED IN: 25 plant structures; EXPRESSED DURING: 15 growth stages; Has 53 Blast hits to 53 proteins in 21 species: Archae - 0; Bacteria - 0; Metazoa - 0; Fungi - 0; Plants - 48; Viruses - 0; Other Eukaryotes - 5 (source: NCBI BLink). | chr3:19139715…
MD04G1177800	Symbols: | RNA-binding KH domain-containing protein | chr2:16147552-16149638 REVERSE LENGTH=286
MD04G1184900	Symbols: MYB55 | myb domain protein 55 | chr4:716401-717415 REVERSE LENGTH=241
MD04G1207400	Symbols: | HSP20-like chaperones superfamily protein | chr1:20454440-20455994 FORWARD LENGTH=206
MD04G1229400	Symbols: MYB15, ATY19, ATMYB15 | myb domain protein 15 | chr3:8309742-8310624 FORWARD LENGTH=228
MD04G1238000	Symbols: | NB-ARC domain-containing disease resistance protein | chr1:18584235-18587136 FORWARD LENGTH=857
MD05G1008000	Symbols: ATRABA2D, ATRAB-A2D, RABA2D | RAB GTPase homolog A2D | chr5:23876858-23878244 FORWARD LENGTH=217
MD05G1018900	Symbols: | disease resistance protein (TIR-NBS-LRR class), putative | chr5:5822999-5827153 FORWARD LENGTH=1294
MD05G1019100	Symbols: | Disease resistance protein (TIR-NBS-LRR class) family | chr5:14567771-14571916 REVERSE LENGTH=1191
MD05G1022400	Symbols: | disease resistance protein (TIR-NBS-LRR class), putative | chr5:5822999-5827153 FORWARD LENGTH=1294
MD05G1032800	Symbols: OHP2 | one-helix protein 2 | chr1:12358151-12358902 REVERSE LENGTH=172
MD05G1060800	Symbols: | Malectin/receptor-like protein kinase family protein | chr4:18222483-18225119 REVERSE LENGTH=878
MD05G1065100	Symbols: CIB1 | cryptochrome-interacting basic-helix-loop-helix 1 | chr4:16498466-16499946 FORWARD LENGTH=335
MD05G1070800	Symbols: LACS2, LRD2 | long-chain acyl-CoA synthetase 2 | chr1:18291188-18295641 FORWARD LENGTH=665
MD05G1078200	Symbols: ATRAB11A, ATRABA2C, ATRAB-A2C, RAB-A2C, RABA2c | RAB GTPase homolog A2C | chr3:17246699-17248362 REVERSE LENGTH=217
MD05G1085700	Symbols: UGT73B3 | UDP-glucosyl transferase 73B3 | chr4:16343268-16344713 REVERSE LENGTH=481
MD05G1105600	Symbols: ATPRP40B, PRP40B | pre-mRNA-processing protein 40B | chr3:6828242-6836582 REVERSE LENGTH=992
MD05G1137900	Symbols: | disease resistance protein (TIR-NBS-LRR class), putative | chr5:5822999-5827153 FORWARD LENGTH=1294
MD05G1138500	Symbols: | Disease resistance protein (TIR-NBS-LRR class) family | chr4:7197325-7201393 REVERSE LENGTH=1219
MD05G1139800	Symbols: TMT2 | tonoplast monosaccharide transporter2 | chr4:16796432-16799071 REVERSE LENGTH=739
MD05G1178400	Symbols: | Galactose oxidase/kelch repeat superfamily protein | chr3:9040108-9041259 FORWARD LENGTH=383
MD05G1190400	Symbols: | Leucine-rich repeat receptor-like protein kinase family protein | chr4:5636693-5640496 REVERSE LENGTH=1045
MD05G1190800	Symbols: | Leucine-rich receptor-like protein kinase family protein | chr1:5891375-5894855 FORWARD LENGTH=1101
MD05G1197600	Symbols: MYB15, ATY19, ATMYB15 | myb domain protein 15 | chr3:8309492-8310624 FORWARD LENGTH=285
MD05G1230100	Symbols: HOG1, EMB1395, SAHH1, MEE58, ATSAHH1 | S-adenosyl-L-homocysteine hydrolase | chr4:8054931-8056676 FORWARD LENGTH=485
MD05G1238400	Symbols: APL, WDY | Homeodomain-like superfamily protein | chr1:29877521-29879135 REVERSE LENGTH=358
MD05G1243900	Symbols: ATY53, ATMYB67, MYB67 | myb domain protein 67 | chr3:4043407-4044522 REVERSE LENGTH=307
MD05G1257400	Symbols: | Root hair defective 3 GTP-binding protein (RHD3) | chr5:18264991-18270035 FORWARD LENGTH=834
MD05G1273700	Symbols: PHB, ATHB14, ATHB-14, PHB-1D | Homeobox-leucine zipper family protein / lipid-binding START domain-containing protein | chr2:14639548-14643993 REVERSE LENGTH=852
MD05G1296700	Symbols: CESA8, IRX1, ATCESA8, LEW2 | cellulose synthase family protein | chr4:10312846-10316719 REVERSE LENGTH=985
MD05G1318100	Symbols: | Major facilitator superfamily protein | chr2:8947496-8949170 REVERSE LENGTH=526
MD06G1002400	Symbols: FRS5 | FAR1-related sequence 5 | chr4:17906702-17909404 REVERSE LENGTH=788
MD06G1010000	Symbols: | DNA-binding bromodomain-containing protein | chr1:7164537-7167933 REVERSE LENGTH=652
MD06G1019800	Symbols: CHAT | acetyl CoA:(Z)-3-hexen-1-ol acetyltransferase | chr3:828400-829863 REVERSE LENGTH=454
MD06G1024300	Symbols: RPM1, RPS3 | NB-ARC domain-containing disease resistance protein | chr3:2226244-2229024 REVERSE LENGTH=926
MD06G1024500	Symbols: RPM1, RPS3 | NB-ARC domain-containing disease resistance protein | chr3:2226244-2229024 REVERSE LENGTH=926
MD06G1053100	Symbols: ATMYB5, MYB5 | myb domain protein 5 | chr3:4420239-4421443 FORWARD LENGTH=249
MD06G1089700	Symbols: AtMYB103, MYB103 | myb domain protein 103 | chr1:23719968-23721625 REVERSE LENGTH=370
MD06G1098100	Symbols: | FUNCTIONS IN: molecular_function unknown; INVOLVED IN: biological_process unknown; LOCATED IN: chloroplast, plasma membrane; EXPRESSED IN: 9 plant structures; EXPRESSED DURING: 6 growth stages; BEST Arabidopsis thaliana protein match is: intracellular protein transport protein USO1-related (TAIR:AT1G64180.1); Has 30201 Blast hits to 17322 proteins in 780 species: Archae - 12; Bacteria …
MD06G1191400	Symbols: ATEB1B, ATEB1, EB1B | end binding protein 1B | chr5:25092929-25095006 FORWARD LENGTH=293
MD06G1196100	Symbols: ANAC100, ATNAC5, NAC100 | NAC domain containing protein 100 | chr5:24701328-24702553 REVERSE LENGTH=336
MD06G1200700	Symbols: | FUNCTIONS IN: molecular_function unknown; INVOLVED IN: biological_process unknown; LOCATED IN: cellular_component unknown; EXPRESSED IN: pollen tube; BEST Arabidopsis thaliana protein match is: dentin sialophosphoprotein-related (TAIR:AT5G07980.1). | chr5:2534720-2540086 FORWARD LENGTH=1526
MD06G1217200	Symbols: MYB116, AtMYB116 | myb domain protein 116 | chr1:8885210-8886271 FORWARD LENGTH=283
MD06G1241200	Symbols: | S-adenosyl-L-methionine-dependent methyltransferases superfamily protein | chr1:27565728-27567206 REVERSE LENGTH=316
MD07G1010500	Symbols: ATMYB46, MYB46 | myb domain protein 46 | chr5:4062939-4064939 REVERSE LENGTH=280
MD07G1017800	Symbols: RLF | reduced lateral root formation | chr5:2999362-3000185 REVERSE LENGTH=211
MD07G1025200	Symbols: | NB-ARC domain-containing disease resistance protein | chr3:4857940-4861104 FORWARD LENGTH=1054
MD07G1074000	Symbols: | Galactose oxidase/kelch repeat superfamily protein | chr5:1246867-1249455 REVERSE LENGTH=514
MD07G1075300	Symbols: SWC2, ATSWC2 | sequence-specific DNA binding transcription factors;DNA binding;DNA binding | chr2:15407066-15409430 REVERSE LENGTH=365
MD07G1085000	Symbols: MYB33, ATMYB33 | myb domain protein 33 | chr5:1838555-1840386 FORWARD LENGTH=520
MD07G1101000	Symbols: DUO1 | myb-like HTH transcriptional regulator family protein | chr3:22342429-22343491 REVERSE LENGTH=297
MD07G1115800	Symbols: HAM3, ATHAM3, LOM3 | GRAS family transcription factor | chr4:57429-59105 REVERSE LENGTH=558
MD07G1127000	Symbols: ATSK32, ASKTHETA, SK32 | shaggy-like protein kinase 32 | chr4:294116-297002 REVERSE LENGTH=472
MD07G1128700	Symbols: PFC1 | Ribosomal RNA adenine dimethylase family protein | chr1:304439-306275 REVERSE LENGTH=343
MD07G1150400	Symbols: | Protein with RING/U-box and TRAF-like domains | chr3:22871974-22873543 REVERSE LENGTH=326
MD07G1165400	Symbols: MMP | matrix metalloproteinase | chr1:26424005-26425141 FORWARD LENGTH=378
MD07G1211300	Symbols: MYB109, AtMYB109 | myb domain protein 109 | chr3:20682114-20683963 REVERSE LENGTH=399
MD07G1263500	Symbols: LBD24 | LOB domain-containing protein 24 | chr3:9797136-9797610 REVERSE LENGTH=121
MD07G1269600	#N/A
MD07G1277000	Symbols: ATDTX35, FFT, DTX35 | detoxifying efflux carrier 35 | chr4:13076953-13078965 REVERSE LENGTH=488
MD08G1001700	Symbols: ATRLI2, RLI2 | RNAse l inhibitor protein 2 | chr4:10501906-10504776 FORWARD LENGTH=605
MD08G1043000	Symbols: | NB-ARC domain-containing disease resistance protein | chr3:4857940-4861104 FORWARD LENGTH=1054
MD08G1047600	Symbols: ATGLR2.7, GLR2.7 | glutamate receptor 2.7 | chr2:12511479-12515893 REVERSE LENGTH=952
MD08G1056600	Symbols: | NB-ARC domain-containing disease resistance protein | chr3:4857940-4861104 FORWARD LENGTH=1054
MD08G1070700	Symbols: TT2, ATMYB123, MYB123, ATTT2 | Duplicated homeodomain-like superfamily protein | chr5:13726807-13727729 FORWARD LENGTH=258
MD08G1070900	Symbols: AtMYB6, MYB6 | myb domain protein 6 | chr4:5993019-5994038 FORWARD LENGTH=236
MD08G1093300	Symbols: | NB-ARC domain-containing disease resistance protein | chr3:4857940-4861104 FORWARD LENGTH=1054
MD08G1094300	Symbols: | NB-ARC domain-containing disease resistance protein | chr3:4857940-4861104 FORWARD LENGTH=1054
MD08G1096800	Symbols: | NB-ARC domain-containing disease resistance protein | chr3:4857940-4861104 FORWARD LENGTH=1054
MD08G1097100	Symbols: | NB-ARC domain-containing disease resistance protein | chr3:4857940-4861104 FORWARD LENGTH=1054
MD08G1098600	Symbols: | NB-ARC domain-containing disease resistance protein | chr3:4857940-4861104 FORWARD LENGTH=1054
MD08G1099900	Symbols: | NB-ARC domain-containing disease resistance protein | chr3:4857940-4861104 FORWARD LENGTH=1054
MD08G1104200	Symbols: | NB-ARC domain-containing disease resistance protein | chr3:4857940-4861104 FORWARD LENGTH=1054
MD08G1112900	Symbols: ATHB-8, ATHB8, HB-8 | homeobox gene 8 | chr4:15863587-15867822 REVERSE LENGTH=833
MD08G1128800	Symbols: | NB-ARC domain-containing disease resistance protein | chr3:4857940-4861104 FORWARD LENGTH=1054
MD08G1129500	Symbols: | NB-ARC domain-containing disease resistance protein | chr3:4857940-4861104 FORWARD LENGTH=1054
MD08G1159600	Symbols: EFS, SDG8, CCR1, ASHH2, LAZ2 | histone methyltransferases(H3-K4 specific);histone methyltransferases(H3-K36 specific) | chr1:29040160-29048810 REVERSE LENGTH=1805
MD08G1182700	Symbols: | Mitochondrial substrate carrier family protein | chr5:25958806-25960443 REVERSE LENGTH=428
MD08G1183100	Symbols: AtMYB93, MYB93 | myb domain protein 93 | chr1:12709128-12710423 FORWARD LENGTH=365
MD08G1206600	Symbols: | Pentatricopeptide repeat (PPR-like) superfamily protein | chr1:3218133-3219929 FORWARD LENGTH=598
MD09G1032400	Symbols: ATBCA3, BCA3 | beta carbonic anhydrase 3 | chr1:8395965-8398014 FORWARD LENGTH=258
MD09G1053700	Symbols: ANAC100, ATNAC5, NAC100 | NAC domain containing protein 100 | chr5:24701328-24702553 REVERSE LENGTH=336
MD09G1055800	Symbols: | Disease resistance protein (CC-NBS-LRR class) family | chr5:25283252-25286002 REVERSE LENGTH=888
MD09G1069300	Symbols: FER | Malectin/receptor-like protein kinase family protein | chr3:19117877-19120564 REVERSE LENGTH=895
MD09G1073600	Symbols: ATMYB121, MYB121 | myb domain protein 121 | chr3:11838567-11840313 FORWARD LENGTH=276
MD09G1139300	Symbols: | unknown protein; FUNCTIONS IN: molecular_function unknown; INVOLVED IN: biological_process unknown; LOCATED IN: cellular_component unknown; BEST Arabidopsis thaliana protein match is: unknown protein (TAIR:AT2G42370.1). | chr3:21516775-21519129 FORWARD LENGTH=754
MD09G1160100	Symbols: ATRLI2, RLI2 | RNAse l inhibitor protein 2 | chr4:10501906-10504776 FORWARD LENGTH=605
MD09G1171000	Symbols: | Leucine-rich receptor-like protein kinase family protein | chr1:27217679-27220966 REVERSE LENGTH=1095
MD09G1183800	Symbols: WER, ATMYB66, WER1, MYB66 | myb domain protein 66 | chr5:4763656-4764738 REVERSE LENGTH=203
MD09G1184000	Symbols: ATMYB4, MYB4 | myb domain protein 4 | chr4:18053866-18054876 FORWARD LENGTH=282
MD09G1191100	Symbols: MYB26 | myb domain protein 26 | chr3:4576744-4578027 REVERSE LENGTH=358
MD09G1205400	Symbols: ATHB-15, ATHB15, CNA, ICU4 | Homeobox-leucine zipper family protein / lipid-binding START domain-containing protein | chr1:19409913-19413961 REVERSE LENGTH=836
MD09G1223600	Symbols: AHA9, HA9 | H(+)-ATPase 9 | chr1:30316227-30319948 REVERSE LENGTH=954
MD09G1225800	Symbols: J8 | Chaperone DnaJ-domain superfamily protein | chr1:30403863-30404549 REVERSE LENGTH=163
MD09G1232100	Symbols: | unknown protein; FUNCTIONS IN: molecular_function unknown; INVOLVED IN: biological_process unknown; LOCATED IN: cellular_component unknown; EXPRESSED IN: 23 plant structures; EXPRESSED DURING: 15 growth stages; BEST Arabidopsis thaliana protein match is: unknown protein (TAIR:AT4G32342.1). | chr5:8799934-8802333 REVERSE LENGTH=169
MD09G1258800	Symbols: THO2, AtTHO2 | THO2 | chr1:8742210-8755243 FORWARD LENGTH=1804
MD09G1286900	Symbols: AtMYB78, MYB78 | myb domain protein 78 | chr5:20137491-20139384 REVERSE LENGTH=307
MD10G1006400	Symbols: | disease resistance protein (TIR-NBS-LRR class), putative | chr5:5822999-5827153 FORWARD LENGTH=1294
MD10G1006800	Symbols: | Disease resistance protein (TIR-NBS-LRR class) family | chr4:7197325-7201393 REVERSE LENGTH=1219
MD10G1036400	Symbols: KCS4 | 3-ketoacyl-CoA synthase 4 | chr1:6729119-6730669 FORWARD LENGTH=516
MD10G1061600	Symbols: | ribosome-binding factor A family protein | chr4:16570019-16571274 REVERSE LENGTH=215
MD10G1068600	Symbols: | Malectin/receptor-like protein kinase family protein | chr4:18222483-18225119 REVERSE LENGTH=878
MD10G1085400	Symbols: LACS2, LRD2 | long-chain acyl-CoA synthetase 2 | chr1:18291188-18295641 FORWARD LENGTH=665
MD10G1100300	Symbols: | Tetratricopeptide repeat (TPR)-like superfamily protein | chr4:1221116-1223461 REVERSE LENGTH=781
MD10G1124500	Symbols: BGLU12 | beta glucosidase 12 | chr5:16898712-16900235 FORWARD LENGTH=507
MD10G1135300	Symbols: | Disease resistance protein (TIR-NBS-LRR class) family | chr4:7197325-7201393 REVERSE LENGTH=1219
MD10G1176800	Symbols: HEN1 | double-stranded RNA binding protein-related / DsRBD protein-related | chr4:11186264-11190575 REVERSE LENGTH=942
MD10G1184100	Symbols: MYB15, ATY19, ATMYB15 | myb domain protein 15 | chr3:8309492-8310624 FORWARD LENGTH=285
MD10G1197800	Symbols: | RNA methyltransferase family protein | chr5:25668997-25670731 REVERSE LENGTH=377
MD10G1198400	Symbols: NAC1, ANAC022 | NAC domain containing protein 1 | chr1:20946852-20949144 REVERSE LENGTH=324
MD10G1205400	Symbols: ATMYB63, MYB63 | myb domain protein 63 | chr1:29786509-29787589 FORWARD LENGTH=294
MD10G1216700	Symbols: APL, WDY | Homeodomain-like superfamily protein | chr1:29877521-29879135 REVERSE LENGTH=358
MD10G1221600	Symbols: | disease resistance family protein / LRR family protein | chr2:14737169-14739886 REVERSE LENGTH=905
MD10G1223100	Symbols: | disease resistance family protein / LRR family protein | chr2:14737169-14739886 REVERSE LENGTH=905
MD10G1225800	Symbols: ATY53, ATMYB67, MYB67 | myb domain protein 67 | chr3:4043407-4044522 REVERSE LENGTH=307
MD10G1253500	Symbols: PHB, ATHB14, ATHB-14, PHB-1D | Homeobox-leucine zipper family protein / lipid-binding START domain-containing protein | chr2:14639548-14643993 REVERSE LENGTH=852
MD10G1270700	Symbols: | GDSL-like Lipase/Acylhydrolase superfamily protein | chr1:10375843-10377717 FORWARD LENGTH=363
MD10G1270900	Symbols: | GDSL-like Lipase/Acylhydrolase superfamily protein | chr1:10375843-10377717 FORWARD LENGTH=363
MD10G1273200	Symbols: | Leucine-rich repeat transmembrane protein kinase | chr3:4988271-4993891 FORWARD LENGTH=1020
MD10G1322900	#N/A
MD11G1019800	Symbols: | NB-ARC domain-containing disease resistance protein | chr4:13620977-13623934 REVERSE LENGTH=985
MD11G1020200	Symbols: | NB-ARC domain-containing disease resistance protein | chr4:13620977-13623934 REVERSE LENGTH=985
MD11G1020500	Symbols: | NB-ARC domain-containing disease resistance protein | chr4:13620977-13623934 REVERSE LENGTH=985
MD11G1054600	Symbols: | NB-ARC domain-containing disease resistance protein | chr3:4857940-4861104 FORWARD LENGTH=1054
MD11G1063800	Symbols: | NAD(P)-binding Rossmann-fold superfamily protein | chr5:23643068-23644455 FORWARD LENGTH=324
MD11G1063900	Symbols: | NB-ARC domain-containing disease resistance protein | chr3:4857940-4861104 FORWARD LENGTH=1054
MD11G1064300	Symbols: | NB-ARC domain-containing disease resistance protein | chr3:4857940-4861104 FORWARD LENGTH=1054
MD11G1064900	Symbols: | NB-ARC domain-containing disease resistance protein | chr3:4857940-4861104 FORWARD LENGTH=1054
MD11G1066900	Symbols: | NB-ARC domain-containing disease resistance protein | chr3:4857940-4861104 FORWARD LENGTH=1054
MD11G1070100	Symbols: | Clathrin, heavy chain | chr3:3482575-3491667 REVERSE LENGTH=1705
MD11G1077200	Symbols: | NB-ARC domain-containing disease resistance protein | chr3:4857940-4861104 FORWARD LENGTH=1054
MD11G1077700	Symbols: | NB-ARC domain-containing disease resistance protein | chr3:4857940-4861104 FORWARD LENGTH=1054
MD11G1077900	Symbols: | NB-ARC domain-containing disease resistance protein | chr3:4857940-4861104 FORWARD LENGTH=1054
MD11G1078100	Symbols: | NB-ARC domain-containing disease resistance protein | chr3:4857940-4861104 FORWARD LENGTH=1054
MD11G1078300	Symbols: | NB-ARC domain-containing disease resistance protein | chr3:4857940-4861104 FORWARD LENGTH=1054
MD11G1078500	Symbols: | NB-ARC domain-containing disease resistance protein | chr3:4857940-4861104 FORWARD LENGTH=1054
MD11G1080800	Symbols: | Homeodomain-like transcriptional regulator | chr5:23783275-23784667 REVERSE LENGTH=288
MD11G1136800	Symbols: REV, IFL, IFL1 | Homeobox-leucine zipper family protein / lipid-binding START domain-containing protein | chr5:24397734-24401933 FORWARD LENGTH=842
MD11G1157100	Symbols: emb1211 | MORN (Membrane Occupation and Recognition Nexus) repeat-containing protein | chr5:7529423-7533641 FORWARD LENGTH=871
MD11G1201000	Symbols: | Pyridoxal-5&apos;-phosphate-dependent enzyme family protein | chr1:20899619-20901140 REVERSE LENGTH=348
MD11G1213500	Symbols: WRKY6, ATWRKY6 | WRKY family transcription factor | chr1:23016887-23019155 REVERSE LENGTH=553
MD11G1215600	Symbols: MYB101, ATMYB101, ATM1 | myb domain protein 101 | chr2:13782419-13784363 REVERSE LENGTH=490
MD11G1216000	Symbols: MYB101, ATMYB101, ATM1 | myb domain protein 101 | chr2:13782419-13784359 REVERSE LENGTH=478
MD11G1246700	Symbols: | Ubiquitin-conjugating enzyme family protein | chr1:19757072-19759474 REVERSE LENGTH=543
MD11G1247100	Symbols: | Protein kinase superfamily protein | chr1:19772574-19775531 FORWARD LENGTH=694
MD11G1251700	Symbols: PSKR2, AtPSKR2 | phytosylfokine-alpha receptor 2 | chr5:21877235-21880345 FORWARD LENGTH=1036
MD11G1253500	Symbols: CUC2, ANAC098, ATCUC2 | NAC (No Apical Meristem) domain transcriptional regulator superfamily protein | chr5:21901966-21903795 REVERSE LENGTH=375
MD11G1267200	Symbols: BEH4 | BES1/BZR1 homolog 4 | chr1:29599854-29601539 FORWARD LENGTH=325
MD11G1269700	Symbols: | Protein of unknown function DUF92, transmembrane | chr1:29573862-29575758 REVERSE LENGTH=333
MD11G1316400	Symbols: | Late embryogenesis abundant protein (LEA) family protein | chr3:23146931-23147735 FORWARD LENGTH=213
MD12G1023500	Symbols: ZPR3 | protein binding | chr3:19557891-19558094 REVERSE LENGTH=67
MD12G1100900	Symbols: | Sulfite exporter TauE/SafE family protein | chr2:15352767-15355050 REVERSE LENGTH=459
MD12G1138300	Symbols: HTA12 | histone H2A 12 | chr5:575437-576456 FORWARD LENGTH=153
MD12G1162000	Symbols: | BTB/POZ domain-containing protein | chr3:2754841-2756223 FORWARD LENGTH=460
MD12G1179300	#N/A
MD12G1180400	Symbols: | NB-ARC domain-containing disease resistance protein | chr3:4857940-4861104 FORWARD LENGTH=1054
MD12G1192800	Symbols: | Leucine-rich repeat protein kinase family protein | chr5:365040-369532 REVERSE LENGTH=951
MD12G1193400	Symbols: | RNA-binding KH domain-containing protein | chr2:16147552-16149638 REVERSE LENGTH=286
MD12G1198600	Symbols: MYB61, ATMYB61 | myb domain protein 61 | chr1:3086333-3087689 FORWARD LENGTH=366
MD12G1256300	Symbols: | NB-ARC domain-containing disease resistance protein | chr1:18584235-18587136 FORWARD LENGTH=857
MD12G1263300	Symbols: | unknown protein; FUNCTIONS IN: molecular_function unknown; INVOLVED IN: biological_process unknown; LOCATED IN: endoplasmic reticulum, plasma membrane; EXPRESSED IN: 24 plant structures; EXPRESSED DURING: 13 growth stages; Has 149 Blast hits to 149 proteins in 49 species: Archae - 0; Bacteria - 0; Metazoa - 98; Fungi - 0; Plants - 47; Viruses - 0; Other Eukaryotes - 4 (source: NCBI BLi…
MD13G1026400	Symbols: AtMYB6, MYB6 | myb domain protein 6 | chr4:5993019-5994038 FORWARD LENGTH=236
MD13G1030400	Symbols: | Dynein light chain type 1 family protein | chr1:8242614-8244136 FORWARD LENGTH=129
MD13G1065200	Symbols: | Leucine-rich repeat (LRR) family protein | chr5:24629485-24631958 FORWARD LENGTH=326
MD13G1074300	Symbols: KDR | basic helix-loop-helix (bHLH) DNA-binding superfamily protein | chr1:9351571-9352474 FORWARD LENGTH=94
MD13G1078900	Symbols: | Protein kinase superfamily protein | chr5:4886414-4888555 FORWARD LENGTH=493
MD13G1094100	Symbols: | Pectin lyase-like superfamily protein | chr1:22314426-22316867 REVERSE LENGTH=540
MD13G1103700	Symbols: CYP71A25 | cytochrome P450, family 71, subfamily A, polypeptide 25 | chr3:17879594-17881164 FORWARD LENGTH=490
MD13G1104100	Symbols: CYP71B37 | cytochrome P450, family 71, subfamily B, polypeptide 37 | chr3:9646873-9648536 REVERSE LENGTH=500
MD13G1139300	Symbols: | Tetratricopeptide repeat (TPR)-like superfamily protein | chr5:26551879-26553741 FORWARD LENGTH=620
MD13G1148600	#N/A
MD13G1157500	Symbols: | cAMP-regulated phosphoprotein 19-related protein | chr4:9142663-9144356 REVERSE LENGTH=102
MD13G1241000	Symbols: ACA10, CIF1, ATACA10 | autoinhibited Ca(2+)-ATPase 10 | chr4:14611225-14618775 REVERSE LENGTH=1069
MD14G1006500	Symbols: | Polynucleotidyl transferase, ribonuclease H fold protein with HRDC domain | chr5:14029871-14035405 REVERSE LENGTH=870
MD14G1007700	Symbols: | unknown protein; Has 30201 Blast hits to 17322 proteins in 780 species: Archae - 12; Bacteria - 1396; Metazoa - 17338; Fungi - 3422; Plants - 5037; Viruses - 0; Other Eukaryotes - 2996 (source: NCBI BLink). | chr5:14884477-14885517 REVERSE LENGTH=156
MD14G1012300	Symbols: | MATE efflux family protein | chr1:12005084-12008618 FORWARD LENGTH=494
MD14G1017300	Symbols: | unknown protein; BEST Arabidopsis thaliana protein match is: unknown protein (TAIR:AT2G36420.1); Has 700 Blast hits to 624 proteins in 104 species: Archae - 0; Bacteria - 18; Metazoa - 333; Fungi - 60; Plants - 73; Viruses - 24; Other Eukaryotes - 192 (source: NCBI BLink). | chr5:947311-949898 FORWARD LENGTH=516
MD14G1017600	Symbols: AtGRF4, GRF4 | growth-regulating factor 4 | chr3:19616177-19618268 REVERSE LENGTH=380
MD14G1021600	Symbols: ABI5, GIA1 | Basic-leucine zipper (bZIP) transcription factor family protein | chr2:15204980-15206571 REVERSE LENGTH=442
MD14G1067400	Symbols: | exostosin family protein | chr3:21339543-21343080 REVERSE LENGTH=793
MD14G1072500	Symbols: | NB-ARC domain-containing disease resistance protein | chr3:4857940-4861104 FORWARD LENGTH=1054
MD14G1102200	Symbols: | AMP-dependent synthetase and ligase family protein | chr3:18159031-18161294 REVERSE LENGTH=514
MD14G1134900	Symbols: AtMYB6, MYB6 | myb domain protein 6 | chr4:5993019-5994038 FORWARD LENGTH=236
MD14G1172900	Symbols: ATMYB86, MYB86 | myb domain protein 86 | chr5:9331775-9333044 REVERSE LENGTH=352
MD14G1187400	Symbols: ALDH10A8 | aldehyde dehydrogenase 10A8 | chr1:28139175-28142573 REVERSE LENGTH=501
MD14G1197800	Symbols: ATEB1B, ATEB1, EB1B | end binding protein 1B | chr5:25092929-25095006 FORWARD LENGTH=293
MD14G1203000	Symbols: ANAC100, ATNAC5, NAC100 | NAC domain containing protein 100 | chr5:24701328-24702553 REVERSE LENGTH=336
MD14G1210400	Symbols: | dentin sialophosphoprotein-related | chr5:2549432-2554669 REVERSE LENGTH=1501
MD14G1227500	Symbols: MYB62, AtMYB62, BW62B, BW62C | myb domain protein 62 | chr1:25603842-25604884 FORWARD LENGTH=286
MD15G1001000	Symbols: ATRLI2, RLI2 | RNAse l inhibitor protein 2 | chr4:10501906-10504776 FORWARD LENGTH=605
MD15G1035600	Symbols: | NB-ARC domain-containing disease resistance protein | chr3:4857940-4861104 FORWARD LENGTH=1054
MD15G1042600	Symbols: | NB-ARC domain-containing disease resistance protein | chr3:4857940-4861104 FORWARD LENGTH=1054
MD15G1046900	Symbols: ZAR1 | HOPZ-ACTIVATED RESISTANCE 1 | chr3:18936127-18938685 FORWARD LENGTH=852
MD15G1050300	Symbols: WER, ATMYB66, WER1, MYB66 | myb domain protein 66 | chr5:4763656-4764738 REVERSE LENGTH=203
MD15G1051000	Symbols: ATMYB3, MYB3 | myb domain protein 3 | chr1:8006289-8007219 FORWARD LENGTH=257
MD15G1051400	Symbols: MYB7, ATMYB7, ATY49 | myb domain protein 7 | chr2:7255669-7256550 REVERSE LENGTH=269
MD15G1066400	Symbols: | Carbohydrate-binding protein | chr1:3326160-3327404 FORWARD LENGTH=414
MD15G1092200	Symbols: ATHB-8, ATHB8, HB-8 | homeobox gene 8 | chr4:15863587-15867822 REVERSE LENGTH=833
MD15G1151800	Symbols: APO2 | Arabidopsis thaliana protein of unknown function (DUF794) | chr5:23454690-23456354 FORWARD LENGTH=443
MD15G1152700	Symbols: FAD6, FADC, SFD4 | fatty acid desaturase 6 | chr4:15057278-15059673 REVERSE LENGTH=448
MD15G1157600	Symbols: DCL4, ATDCL4 | dicer-like 4 | chr5:6859571-6869068 REVERSE LENGTH=1702
MD15G1215100	Symbols: ATMYB3, MYB3 | myb domain protein 3 | chr1:8006289-8007219 FORWARD LENGTH=257
MD15G1215400	Symbols: TT2, ATMYB123, MYB123, ATTT2 | Duplicated homeodomain-like superfamily protein | chr5:13726807-13727729 FORWARD LENGTH=258
MD15G1215500	Symbols: TT2, ATMYB123, MYB123, ATTT2 | Duplicated homeodomain-like superfamily protein | chr5:13726807-13727729 FORWARD LENGTH=258
MD15G1216000	Symbols: AtGRF5, GRF5 | growth-regulating factor 5 | chr3:4608526-4610160 FORWARD LENGTH=397
MD15G1228300	Symbols: TMT2 | tonoplast monosaccharide transporter2 | chr4:16796432-16799071 REVERSE LENGTH=739
MD15G1233700	Symbols: YLS2, SSL5 | Calcium-dependent phosphotriesterase superfamily protein | chr3:19086548-19087909 FORWARD LENGTH=371
MD15G1302300	Symbols: RAX3, MYB84, ATMYB84 | myb domain protein 84 | chr3:18427941-18429100 FORWARD LENGTH=310
MD15G1323500	Symbols: AtMYB93, MYB93 | myb domain protein 93 | chr1:12709128-12710423 FORWARD LENGTH=365
MD15G1344300	Symbols: CYCA1;1 | Cyclin A1;1 | chr1:16775035-16777182 REVERSE LENGTH=460
MD15G1369700	Symbols: AtMYB93, MYB93 | myb domain protein 93 | chr1:12709128-12710423 FORWARD LENGTH=365
MD15G1390100	Symbols: | Pentatricopeptide repeat (PPR-like) superfamily protein | chr1:3218133-3219929 FORWARD LENGTH=598
MD15G1443800	Symbols: MMT | methionine S-methyltransferase | chr5:20239418-20246046 FORWARD LENGTH=1071
MD16G1021100	Symbols: | Dynein light chain type 1 family protein | chr1:8242614-8244136 FORWARD LENGTH=129
MD16G1028800	#N/A
MD16G1029400	Symbols: MYB7, ATMYB7, ATY49 | myb domain protein 7 | chr2:7255669-7256550 REVERSE LENGTH=269
MD16G1063500	Symbols: | Leucine-rich repeat (LRR) family protein | chr5:24629485-24631958 FORWARD LENGTH=326
MD16G1078600	Symbols: | Protein kinase superfamily protein | chr5:4886414-4888555 FORWARD LENGTH=493
MD16G1119800	Symbols: | unknown protein; FUNCTIONS IN: molecular_function unknown; INVOLVED IN: biological_process unknown; LOCATED IN: chloroplast; EXPRESSED IN: 24 plant structures; EXPRESSED DURING: 13 growth stages; CONTAINS InterPro DOMAIN/s: Protein of unknown function DUF493 (InterPro:IPR007454); Has 76 Blast hits to 76 proteins in 23 species: Archae - 0; Bacteria - 6; Metazoa - 0; Fungi - 0; Plants - …
MD16G1126200	Symbols: | hydroxyproline-rich glycoprotein family protein | chr2:14183552-14187666 FORWARD LENGTH=623
MD16G1148700	#N/A
MD16G1158800	Symbols: MYB111, ATMYB111, PFG3 | myb domain protein 111 | chr5:19999147-20001293 REVERSE LENGTH=342
MD16G1175200	Symbols: | Protein kinase superfamily protein | chr1:20393962-20396902 REVERSE LENGTH=572
MD16G1197500	Symbols: | INVOLVED IN: photosystem II assembly, regulation of chlorophyll biosynthetic process, photosystem I assembly, thylakoid membrane organization, RNA modification; LOCATED IN: chloroplast; EXPRESSED IN: 13 plant structures; EXPRESSED DURING: LP.04 four leaves visible, 4 anthesis, petal differentiation and expansion stage, E expanded cotyledon stage, D bilateral stage; CONTAINS InterPro DO…
MD16G1222000	Symbols: | Transducin/WD40 repeat-like superfamily protein | chr4:8237137-8240324 REVERSE LENGTH=893
MD16G1246100	Symbols: ACA10, CIF1, ATACA10 | autoinhibited Ca(2+)-ATPase 10 | chr4:14611225-14618775 REVERSE LENGTH=1069
MD16G1271400	Symbols: AtMYB9, MYB9 | myb domain protein 9 | chr5:5515209-5516734 FORWARD LENGTH=336
MD16G1277100	Symbols: | Thiamine pyrophosphate dependent pyruvate decarboxylase family protein | chr5:5724920-5726720 REVERSE LENGTH=572
MD17G1017400	Symbols: GT-1 | Homeodomain-like superfamily protein | chr1:4612999-4615115 REVERSE LENGTH=406
MD17G1025700	Symbols: RPM1, RPS3 | NB-ARC domain-containing disease resistance protein | chr3:2226244-2229024 REVERSE LENGTH=926
MD17G1051600	Symbols: ANAC100, ATNAC5, NAC100 | NAC domain containing protein 100 | chr5:24701328-24702553 REVERSE LENGTH=336
MD17G1084700	Symbols: | zinc ion binding | chr1:4251359-4257201 FORWARD LENGTH=988
MD17G1086000	Symbols: ATMYB102, ATM4, MYB102 | MYB-like 102 | chr4:11418425-11419652 REVERSE LENGTH=350
MD17G1122600	Symbols: | unknown protein; Has 27 Blast hits to 27 proteins in 10 species: Archae - 0; Bacteria - 0; Metazoa - 0; Fungi - 0; Plants - 27; Viruses - 0; Other Eukaryotes - 0 (source: NCBI BLink). | chr3:2438171-2439661 FORWARD LENGTH=241
MD17G1145900	Symbols: ATRLI2, RLI2 | RNAse l inhibitor protein 2 | chr4:10501906-10504776 FORWARD LENGTH=605
MD17G1155900	Symbols: | Leucine-rich receptor-like protein kinase family protein | chr1:27217679-27220966 REVERSE LENGTH=1095
MD17G1173700	Symbols: MYB26 | myb domain protein 26 | chr3:4576744-4578027 REVERSE LENGTH=358
MD17G1185400	Symbols: ATHB-15, ATHB15, CNA, ICU4 | Homeobox-leucine zipper family protein / lipid-binding START domain-containing protein | chr1:19409913-19413961 REVERSE LENGTH=836
MD17G1204800	Symbols: | Disease resistance protein (CC-NBS-LRR class) family | chr5:25283252-25286002 REVERSE LENGTH=888
MD17G1205000	Symbols: | Disease resistance protein (CC-NBS-LRR class) family | chr5:25283252-25286002 REVERSE LENGTH=888
MD17G1205300	Symbols: | Disease resistance protein (CC-NBS-LRR class) family | chr5:25283252-25286002 REVERSE LENGTH=888
MD17G1209500	Symbols: | unknown protein; FUNCTIONS IN: molecular_function unknown; INVOLVED IN: biological_process unknown; LOCATED IN: cellular_component unknown; EXPRESSED IN: 23 plant structures; EXPRESSED DURING: 15 growth stages; BEST Arabidopsis thaliana protein match is: unknown protein (TAIR:AT4G32342.1). | chr5:8799934-8802333 REVERSE LENGTH=169
MD17G1224100	Symbols: | Disease resistance protein (CC-NBS-LRR class) family | chr5:25283252-25286002 REVERSE LENGTH=888
MD17G1224600	Symbols: J8 | Chaperone DnaJ-domain superfamily protein | chr1:30403863-30404549 REVERSE LENGTH=163
MD17G1235600	Symbols: | double-stranded-RNA-binding protein 4 | chr3:23225749-23227163 REVERSE LENGTH=329
MD17G1236400	Symbols: AAC3, ATAAC3 | ADP/ATP carrier 3 | chr4:14041486-14042781 REVERSE LENGTH=379
MD17G1245800	Symbols: | Terpenoid cyclases family protein | chr1:29684558-29688673 REVERSE LENGTH=759
MD17G1279200	Symbols: ATMYB2, MYB2 | myb domain protein 2 | chr2:19376284-19377297 FORWARD LENGTH=273
