# Supplementary material for: The Identification of Small RNAs Differentially Expressed in Apple Buds Reveals a Potential Role of the Mir159-MYB Regulatory Module during Dormancy
Source: Plants (Basel). 2021 Dec 3;10(12):2665. doi: 10.3390/plants10122665 (PMC8703471; doi:10.3390/plants10122665)
Supplement: Supplementary file 1 [file plants-10-02665-s001.zip › Sup Table 4.xlsx]

## Sheet: BinGO classification
GO-ID	p-value	corr p-value	x	n	X	N	Description	Genes in test set
6355	3,8576E-28	2,3627E-25	94	3052	289	32615	regulation of transcription, DNA-dependent	MD15G1092200|MD08G1070700|MD09G1205400|MD17G1086000|MD03G1118500|MD02G1191000|MD06G1217200|MD14G1134900|MD08G1112900|MD09G1183800|MD06G1196100|MD03G1034300|MD15G1302300|MD17G1279200|MD01G1214500|MD01G1084400|MD17G1185400|MD10G1253500|MD00G1065700|MD08G1070900|MD05G1197600|MD04G1088100|MD12G1198600|MD01G1031700|MD10G1198400|MD11G1213500|MD02G1210200|MD08G1183100|MD14G1172900|MD11G1215600|MD00G1058…
45449	5,5857E-28	2,3627E-25	94	3067	289	32615	regulation of transcription	MD15G1092200|MD08G1070700|MD09G1205400|MD17G1086000|MD03G1118500|MD02G1191000|MD06G1217200|MD14G1134900|MD08G1112900|MD09G1183800|MD06G1196100|MD03G1034300|MD15G1302300|MD17G1279200|MD01G1214500|MD01G1084400|MD17G1185400|MD10G1253500|MD00G1065700|MD08G1070900|MD05G1197600|MD04G1088100|MD12G1198600|MD01G1031700|MD10G1198400|MD11G1213500|MD02G1210200|MD08G1183100|MD14G1172900|MD11G1215600|MD00G1058…
51252	2,0767E-27	5,8562E-25	94	3121	289	32615	regulation of RNA metabolic process	MD15G1092200|MD08G1070700|MD09G1205400|MD17G1086000|MD03G1118500|MD02G1191000|MD06G1217200|MD14G1134900|MD08G1112900|MD09G1183800|MD06G1196100|MD03G1034300|MD15G1302300|MD17G1279200|MD01G1214500|MD01G1084400|MD17G1185400|MD10G1253500|MD00G1065700|MD08G1070900|MD05G1197600|MD04G1088100|MD12G1198600|MD01G1031700|MD10G1198400|MD11G1213500|MD02G1210200|MD08G1183100|MD14G1172900|MD11G1215600|MD00G1058…
19219	1,5597E-26	3,2988E-24	95	3272	289	32615	regulation of nucleobase, nucleoside, nucleotide and nucleic acid metabolic process	MD15G1092200|MD08G1070700|MD09G1205400|MD17G1086000|MD03G1118500|MD02G1191000|MD06G1217200|MD14G1134900|MD08G1112900|MD09G1183800|MD06G1196100|MD03G1034300|MD15G1302300|MD17G1279200|MD01G1214500|MD01G1084400|MD17G1185400|MD10G1253500|MD00G1065700|MD08G1070900|MD05G1197600|MD04G1088100|MD12G1198600|MD01G1031700|MD10G1198400|MD11G1213500|MD02G1210200|MD08G1183100|MD14G1172900|MD11G1215600|MD00G1058…
51171	7,2571E-26	1,2279E-23	95	3340	289	32615	regulation of nitrogen compound metabolic process	MD15G1092200|MD08G1070700|MD09G1205400|MD17G1086000|MD03G1118500|MD02G1191000|MD06G1217200|MD14G1134900|MD08G1112900|MD09G1183800|MD06G1196100|MD03G1034300|MD15G1302300|MD17G1279200|MD01G1214500|MD01G1084400|MD17G1185400|MD10G1253500|MD00G1065700|MD08G1070900|MD05G1197600|MD04G1088100|MD12G1198600|MD01G1031700|MD10G1198400|MD11G1213500|MD02G1210200|MD08G1183100|MD14G1172900|MD11G1215600|MD00G1058…
10556	2,5536E-25	3,1521E-23	94	3330	289	32615	regulation of macromolecule biosynthetic process	MD15G1092200|MD08G1070700|MD09G1205400|MD17G1086000|MD03G1118500|MD02G1191000|MD06G1217200|MD14G1134900|MD08G1112900|MD09G1183800|MD06G1196100|MD03G1034300|MD15G1302300|MD17G1279200|MD01G1214500|MD01G1084400|MD17G1185400|MD10G1253500|MD00G1065700|MD08G1070900|MD05G1197600|MD04G1088100|MD12G1198600|MD01G1031700|MD10G1198400|MD11G1213500|MD02G1210200|MD08G1183100|MD14G1172900|MD11G1215600|MD00G1058…
10468	2,6081E-25	3,1521E-23	98	3602	289	32615	regulation of gene expression	MD15G1092200|MD17G1086000|MD15G1157600|MD02G1191000|MD06G1217200|MD08G1112900|MD17G1279200|MD01G1084400|MD10G1253500|MD00G1065700|MD08G1070900|MD05G1197600|MD12G1198600|MD01G1031700|MD10G1198400|MD11G1213500|MD02G1312700|MD14G1203000|MD09G1184000|MD15G1216000|MD10G1216700|MD14G1227500|MD04G1184900|MD08G1159600|MD05G1238400|MD02G1269700|MD14G1021600|MD10G1184100|MD09G1286900|MD07G1085000|MD04G1229…
31326	1,2757E-23	1,3491E-21	94	3514	289	32615	regulation of cellular biosynthetic process	MD15G1092200|MD08G1070700|MD09G1205400|MD17G1086000|MD03G1118500|MD02G1191000|MD06G1217200|MD14G1134900|MD08G1112900|MD09G1183800|MD06G1196100|MD03G1034300|MD15G1302300|MD17G1279200|MD01G1214500|MD01G1084400|MD17G1185400|MD10G1253500|MD00G1065700|MD08G1070900|MD05G1197600|MD04G1088100|MD12G1198600|MD01G1031700|MD10G1198400|MD11G1213500|MD02G1210200|MD08G1183100|MD14G1172900|MD11G1215600|MD00G1058…
9889	1,7689E-23	1,6628E-21	94	3530	289	32615	regulation of biosynthetic process	MD15G1092200|MD08G1070700|MD09G1205400|MD17G1086000|MD03G1118500|MD02G1191000|MD06G1217200|MD14G1134900|MD08G1112900|MD09G1183800|MD06G1196100|MD03G1034300|MD15G1302300|MD17G1279200|MD01G1214500|MD01G1084400|MD17G1185400|MD10G1253500|MD00G1065700|MD08G1070900|MD05G1197600|MD04G1088100|MD12G1198600|MD01G1031700|MD10G1198400|MD11G1213500|MD02G1210200|MD08G1183100|MD14G1172900|MD11G1215600|MD00G1058…
60255	8,0761E-23	6,8324E-21	98	3889	289	32615	regulation of macromolecule metabolic process	MD15G1092200|MD17G1086000|MD15G1157600|MD02G1191000|MD06G1217200|MD08G1112900|MD17G1279200|MD01G1084400|MD10G1253500|MD00G1065700|MD08G1070900|MD05G1197600|MD12G1198600|MD01G1031700|MD10G1198400|MD11G1213500|MD02G1312700|MD14G1203000|MD09G1184000|MD15G1216000|MD10G1216700|MD14G1227500|MD04G1184900|MD08G1159600|MD05G1238400|MD02G1269700|MD14G1021600|MD10G1184100|MD09G1286900|MD07G1085000|MD04G1229…
80090	1,4816E-22	1,1395E-20	96	3778	289	32615	regulation of primary metabolic process	MD15G1092200|MD08G1070700|MD09G1205400|MD17G1086000|MD03G1118500|MD02G1191000|MD06G1217200|MD14G1134900|MD08G1112900|MD09G1183800|MD06G1196100|MD03G1034300|MD15G1302300|MD17G1279200|MD01G1214500|MD01G1084400|MD17G1185400|MD10G1253500|MD00G1065700|MD08G1070900|MD05G1197600|MD04G1088100|MD12G1198600|MD01G1031700|MD10G1198400|MD11G1213500|MD02G1210200|MD08G1183100|MD14G1172900|MD11G1215600|MD00G1058…
31323	4,4974E-22	3,1707E-20	99	4054	289	32615	regulation of cellular metabolic process	MD15G1092200|MD17G1086000|MD02G1191000|MD06G1217200|MD08G1112900|MD17G1279200|MD15G1344300|MD01G1084400|MD10G1253500|MD00G1065700|MD08G1070900|MD05G1197600|MD12G1198600|MD01G1031700|MD10G1198400|MD11G1213500|MD02G1312700|MD14G1203000|MD09G1184000|MD15G1216000|MD10G1216700|MD14G1227500|MD04G1184900|MD08G1159600|MD05G1238400|MD02G1269700|MD14G1021600|MD10G1184100|MD09G1286900|MD07G1085000|MD04G1229…
19222	2,9990E-20	1,9517E-18	101	4447	289	32615	regulation of metabolic process	MD15G1092200|MD17G1086000|MD15G1157600|MD02G1191000|MD06G1217200|MD08G1112900|MD17G1279200|MD15G1344300|MD01G1084400|MD10G1253500|MD00G1065700|MD08G1070900|MD05G1197600|MD12G1198600|MD01G1031700|MD10G1198400|MD11G1213500|MD02G1312700|MD14G1203000|MD09G1184000|MD15G1216000|MD10G1216700|MD14G1227500|MD04G1184900|MD08G1159600|MD05G1238400|MD02G1269700|MD14G1021600|MD10G1184100|MD09G1286900|MD07G1085…
50794	1,3324E-16	8,0515E-15	116	6268	289	32615	regulation of cellular process	MD15G1092200|MD16G1063500|MD17G1086000|MD02G1191000|MD06G1217200|MD08G1112900|MD17G1279200|MD15G1344300|MD01G1084400|MD10G1253500|MD00G1065700|MD08G1070900|MD05G1197600|MD12G1198600|MD01G1031700|MD10G1198400|MD11G1213500|MD02G1312700|MD01G1173800|MD14G1203000|MD05G1138500|MD05G1018900|MD00G1030600|MD09G1184000|MD15G1216000|MD10G1216700|MD14G1227500|MD04G1184900|MD08G1159600|MD05G1238400|MD02G1269…
50789	8,7192E-16	4,9176E-14	127	7411	289	32615	regulation of biological process	MD15G1092200|MD16G1063500|MD17G1086000|MD15G1157600|MD02G1191000|MD06G1217200|MD08G1112900|MD17G1279200|MD15G1344300|MD01G1084400|MD10G1253500|MD00G1065700|MD08G1070900|MD05G1197600|MD12G1198600|MD01G1031700|MD10G1198400|MD11G1213500|MD17G1155900|MD02G1312700|MD14G1102200|MD01G1173800|MD14G1203000|MD05G1138500|MD05G1018900|MD00G1030600|MD09G1184000|MD15G1216000|MD10G1216700|MD14G1227500|MD04G1184…
6952	3,7648E-15	1,9907E-13	73	3085	289	32615	defense response	MD05G1137900|MD12G1180400|MD17G1086000|MD15G1157600|MD08G1093300|MD11G1077200|MD08G1043000|MD15G1046900|MD05G1022400|MD00G1120600|MD10G1085400|MD08G1104200|MD17G1204800|MD00G1065700|MD11G1054600|MD08G1129500|MD11G1020500|MD15G1035600|MD08G1097100|MD10G1135300|MD05G1070800|MD10G1223100|MD11G1066900|MD03G1006200|MD08G1128800|MD14G1102200|MD10G1273200|MD10G1221600|MD17G1205300|MD08G1098600|MD05G1138…
50896	1,8073E-14	8,9938E-13	152	10123	289	32615	response to stimulus	MD15G1092200|MD08G1047600|MD12G1180400|MD17G1086000|MD15G1157600|MD02G1191000|MD11G1077200|MD08G1043000|MD08G1112900|MD08G1104200|MD17G1279200|MD06G1191400|MD01G1084400|MD00G1065700|MD11G1054600|MD08G1070900|MD08G1129500|MD05G1197600|MD12G1198600|MD01G1031700|MD10G1198400|MD17G1155900|MD05G1070800|MD05G1032800|MD03G1006200|MD08G1128800|MD14G1102200|MD17G1205300|MD05G1190400|MD17G1224600|MD05G1138…
9751	8,9382E-14	4,2010E-12	24	382	289	32615	response to salicylic acid stimulus	MD15G1369700|MD13G1026400|MD09G1286900|MD02G1191000|MD14G1134900|MD15G1215100|MD15G1323500|MD15G1302300|MD17G1279200|MD01G1144700|MD01G1084400|MD07G1211300|MD08G1070900|MD16G1271400|MD05G1197600|MD01G1031700|MD08G1183100|MD14G1227500|MD16G1029400|MD15G1051400|MD10G1205400|MD00G1092300|MD02G1269700|MD15G1051000
10014	6,0096E-13	2,6759E-11	11	50	289	32615	meristem initiation	MD15G1092200|MD09G1205400|MD10G1198400|MD03G1118500|MD11G1136800|MD11G1253500|MD08G1112900|MD05G1273700|MD03G1034300|MD17G1185400|MD10G1253500
65007	1,9683E-11	8,3261E-10	129	8639	289	32615	biological regulation	MD15G1092200|MD08G1047600|MD16G1063500|MD17G1086000|MD15G1157600|MD02G1191000|MD06G1217200|MD08G1112900|MD17G1279200|MD15G1344300|MD01G1084400|MD10G1253500|MD00G1065700|MD08G1070900|MD05G1197600|MD12G1198600|MD01G1031700|MD10G1198400|MD11G1213500|MD17G1155900|MD02G1312700|MD14G1102200|MD01G1173800|MD14G1203000|MD05G1138500|MD05G1018900|MD00G1030600|MD09G1184000|MD15G1216000|MD10G1216700|MD14G1227…
9855	2,0456E-10	8,2410E-9	6	11	289	32615	determination of bilateral symmetry	MD09G1205400|MD03G1118500|MD11G1136800|MD05G1273700|MD17G1185400|MD10G1253500
48532	2,1869E-10	8,4095E-9	12	107	289	32615	anatomical structure arrangement	MD15G1092200|MD09G1205400|MD10G1198400|MD03G1118500|MD11G1136800|MD12G1023500|MD11G1253500|MD08G1112900|MD05G1273700|MD03G1034300|MD17G1185400|MD10G1253500
9933	6,2234E-10	2,2891E-8	11	92	289	32615	meristem structural organization	MD15G1092200|MD09G1205400|MD10G1198400|MD03G1118500|MD11G1136800|MD11G1253500|MD08G1112900|MD05G1273700|MD03G1034300|MD17G1185400|MD10G1253500
9799	7,4856E-10	2,6387E-8	6	13	289	32615	specification of symmetry	MD09G1205400|MD03G1118500|MD11G1136800|MD05G1273700|MD17G1185400|MD10G1253500
6950	1,1554E-9	3,9098E-8	101	6464	289	32615	response to stress	MD12G1180400|MD17G1086000|MD15G1157600|MD11G1077200|MD08G1043000|MD08G1104200|MD17G1279200|MD01G1084400|MD00G1065700|MD11G1054600|MD08G1129500|MD05G1197600|MD17G1155900|MD05G1070800|MD03G1006200|MD08G1128800|MD14G1102200|MD17G1205300|MD05G1138500|MD05G1018900|MD09G1184000|MD08G1056600|MD09G1055800|MD14G1227500|MD06G1024300|MD10G1006400|MD14G1021600|MD15G1042600|MD08G1099900|MD10G1184100|MD09G1286…
10072	2,1690E-8	7,0576E-7	7	35	289	32615	primary shoot apical meristem specification	MD15G1092200|MD10G1198400|MD11G1253500|MD08G1112900|MD05G1273700|MD03G1034300|MD10G1253500
9888	1,0080E-7	3,1585E-6	29	1064	289	32615	tissue development	MD15G1092200|MD09G1205400|MD14G1067400|MD03G1118500|MD11G1136800|MD12G1023500|MD08G1112900|MD09G1183800|MD03G1034300|MD17G1185400|MD10G1253500|MD04G1088100|MD12G1198600|MD10G1198400|MD02G1210200|MD11G1253500|MD06G1053100|MD15G1050300|MD05G1273700|MD03G1190400|MD02G1087500|MD00G1043300|MD10G1216700|MD04G1039800|MD04G1184900|MD04G1060200|MD00G1124100|MD05G1238400|MD07G1115800
48508	1,1242E-7	3,3968E-6	8	65	289	32615	embryonic meristem development	MD15G1092200|MD10G1198400|MD11G1253500|MD04G1039800|MD08G1112900|MD05G1273700|MD03G1034300|MD10G1253500
48235	1,3570E-7	3,9586E-6	7	45	289	32615	pollen sperm cell differentiation	MD01G1178100|MD11G1216000|MD07G1101000|MD11G1215600|MD07G1085000|MD00G1058800|MD02G1269700
9739	1,5117E-7	4,2629E-6	14	269	289	32615	response to gibberellin stimulus	MD11G1216000|MD14G1021600|MD17G1173700|MD13G1026400|MD02G1191000|MD14G1134900|MD07G1085000|MD01G1144700|MD07G1211300|MD08G1070900|MD14G1227500|MD11G1215600|MD02G1269700|MD09G1191100
54	4,1102E-7	1,0537E-5	4	8	289	32615	ribosomal subunit export from nucleus	MD09G1160100|MD15G1001000|MD17G1145900|MD08G1001700
33750	4,1102E-7	1,0537E-5	4	8	289	32615	ribosome localization	MD09G1160100|MD15G1001000|MD17G1145900|MD08G1001700
33753	4,1102E-7	1,0537E-5	4	8	289	32615	establishment of ribosome localization	MD09G1160100|MD15G1001000|MD17G1145900|MD08G1001700
30154	5,4750E-7	1,3623E-5	29	1155	289	32615	cell differentiation	MD15G1092200|MD11G1216000|MD09G1205400|MD14G1067400|MD03G1118500|MD11G1136800|MD08G1112900|MD09G1183800|MD07G1085000|MD17G1185400|MD10G1253500|MD04G1088100|MD01G1178100|MD02G1210200|MD11G1215600|MD06G1053100|MD15G1050300|MD05G1273700|MD00G1058800|MD03G1190400|MD02G1312700|MD07G1101000|MD02G1087500|MD00G1043300|MD07G1010500|MD04G1039800|MD04G1060200|MD02G1269700|MD07G1115800
40008	6,1054E-7	1,4758E-5	19	552	289	32615	regulation of growth	MD15G1369700|MD11G1216000|MD13G1074300|MD09G1205400|MD12G1023500|MD07G1085000|MD15G1323500|MD07G1017800|MD17G1185400|MD05G1060800|MD16G1271400|MD01G1031700|MD08G1183100|MD10G1068600|MD11G1215600|MD02G1307800|MD09G1069300|MD00G1124100|MD02G1269700
10023	9,5594E-7	2,2464E-5	5	21	289	32615	proanthocyanidin biosynthetic process	MD02G1087900|MD08G1070700|MD09G1184000|MD15G1215400|MD15G1215500
48513	1,0129E-6	2,2551E-5	46	2444	289	32615	organ development	MD15G1092200|MD09G1205400|MD14G1067400|MD03G1118500|MD11G1136800|MD12G1023500|MD02G1088800|MD08G1112900|MD09G1183800|MD07G1085000|MD10G1085400|MD03G1034300|MD01G1214500|MD17G1185400|MD10G1253500|MD04G1088100|MD12G1198600|MD10G1198400|MD02G1210200|MD11G1253500|MD00G1142400|MD07G1277000|MD06G1053100|MD15G1050300|MD05G1273700|MD05G1070800|MD03G1190400|MD17G1173700|MD02G1087500|MD07G1017800|MD00G1043…
48731	1,0129E-6	2,2551E-5	46	2444	289	32615	system development	MD15G1092200|MD09G1205400|MD14G1067400|MD03G1118500|MD11G1136800|MD12G1023500|MD02G1088800|MD08G1112900|MD09G1183800|MD07G1085000|MD10G1085400|MD03G1034300|MD01G1214500|MD17G1185400|MD10G1253500|MD04G1088100|MD12G1198600|MD10G1198400|MD02G1210200|MD11G1253500|MD00G1142400|MD07G1277000|MD06G1053100|MD15G1050300|MD05G1273700|MD05G1070800|MD03G1190400|MD17G1173700|MD02G1087500|MD07G1017800|MD00G1043…
10089	1,6864E-6	3,6581E-5	8	92	289	32615	xylem development	MD15G1092200|MD12G1198600|MD10G1216700|MD03G1118500|MD11G1136800|MD08G1112900|MD04G1184900|MD05G1238400
48232	2,2020E-6	4,6573E-5	7	67	289	32615	male gamete generation	MD01G1178100|MD11G1216000|MD07G1101000|MD11G1215600|MD07G1085000|MD00G1058800|MD02G1269700
9653	2,6764E-6	5,5225E-5	34	1608	289	32615	anatomical structure morphogenesis	MD15G1092200|MD09G1205400|MD14G1067400|MD03G1118500|MD11G1136800|MD12G1023500|MD08G1112900|MD09G1183800|MD07G1085000|MD10G1085400|MD03G1034300|MD17G1185400|MD10G1253500|MD04G1088100|MD10G1198400|MD02G1210200|MD11G1253500|MD17G1155900|MD06G1053100|MD15G1050300|MD05G1273700|MD05G1070800|MD09G1171000|MD03G1190400|MD02G1087500|MD07G1017800|MD00G1043300|MD14G1227500|MD08G1159600|MD02G1307800|MD04G1060…
55046	4,3222E-6	8,7062E-5	7	74	289	32615	microgametogenesis	MD01G1178100|MD11G1216000|MD07G1101000|MD11G1215600|MD07G1085000|MD00G1058800|MD02G1269700
10087	5,2734E-6	1,0375E-4	11	222	289	32615	phloem or xylem histogenesis	MD15G1092200|MD12G1198600|MD09G1205400|MD10G1216700|MD03G1118500|MD11G1136800|MD04G1039800|MD08G1112900|MD04G1184900|MD05G1238400|MD17G1185400
10015	6,9558E-6	1,3374E-4	16	479	289	32615	root morphogenesis	MD03G1190400|MD14G1067400|MD02G1087500|MD09G1183800|MD10G1085400|MD07G1017800|MD00G1043300|MD04G1088100|MD02G1210200|MD14G1227500|MD02G1307800|MD15G1050300|MD04G1060200|MD05G1070800|MD00G1124100|MD07G1115800
45893	7,4275E-6	1,3660E-4	18	596	289	32615	positive regulation of transcription, DNA-dependent	MD02G1312700|MD11G1216000|MD14G1021600|MD02G1087500|MD09G1286900|MD09G1183800|MD07G1085000|MD17G1279200|MD06G1089700|MD05G1197600|MD07G1010500|MD10G1216700|MD11G1215600|MD15G1050300|MD10G1205400|MD04G1060200|MD05G1238400|MD02G1269700
45941	7,4275E-6	1,3660E-4	18	596	289	32615	positive regulation of transcription	MD02G1312700|MD11G1216000|MD14G1021600|MD02G1087500|MD09G1286900|MD09G1183800|MD07G1085000|MD17G1279200|MD06G1089700|MD05G1197600|MD07G1010500|MD10G1216700|MD11G1215600|MD15G1050300|MD10G1205400|MD04G1060200|MD05G1238400|MD02G1269700
48764	9,1594E-6	1,6143E-4	10	192	289	32615	trichoblast maturation	MD04G1088100|MD03G1190400|MD14G1067400|MD02G1087500|MD02G1210200|MD09G1183800|MD15G1050300|MD04G1060200|MD00G1043300|MD07G1115800
48765	9,1594E-6	1,6143E-4	10	192	289	32615	root hair cell differentiation	MD04G1088100|MD03G1190400|MD14G1067400|MD02G1087500|MD02G1210200|MD09G1183800|MD15G1050300|MD04G1060200|MD00G1043300|MD07G1115800
48469	9,5854E-6	1,6218E-4	10	193	289	32615	cell maturation	MD04G1088100|MD03G1190400|MD14G1067400|MD02G1087500|MD02G1210200|MD09G1183800|MD15G1050300|MD04G1060200|MD00G1043300|MD07G1115800
10054	9,5854E-6	1,6218E-4	10	193	289	32615	trichoblast differentiation	MD04G1088100|MD03G1190400|MD14G1067400|MD02G1087500|MD02G1210200|MD09G1183800|MD15G1050300|MD04G1060200|MD00G1043300|MD07G1115800
7276	1,0911E-5	1,8100E-4	7	85	289	32615	gamete generation	MD01G1178100|MD11G1216000|MD07G1101000|MD11G1215600|MD07G1085000|MD00G1058800|MD02G1269700
51254	1,2361E-5	2,0111E-4	18	619	289	32615	positive regulation of RNA metabolic process	MD02G1312700|MD11G1216000|MD14G1021600|MD02G1087500|MD09G1286900|MD09G1183800|MD07G1085000|MD17G1279200|MD06G1089700|MD05G1197600|MD07G1010500|MD10G1216700|MD11G1215600|MD15G1050300|MD10G1205400|MD04G1060200|MD05G1238400|MD02G1269700
10628	1,2630E-5	2,0161E-4	18	620	289	32615	positive regulation of gene expression	MD02G1312700|MD11G1216000|MD14G1021600|MD02G1087500|MD09G1286900|MD09G1183800|MD07G1085000|MD17G1279200|MD06G1089700|MD05G1197600|MD07G1010500|MD10G1216700|MD11G1215600|MD15G1050300|MD10G1205400|MD04G1060200|MD05G1238400|MD02G1269700
32502	1,5479E-5	2,4250E-4	81	5857	289	32615	developmental process	MD15G1092200|MD09G1205400|MD03G1118500|MD15G1157600|MD00G1170700|MD08G1112900|MD09G1183800|MD10G1085400|MD06G1196100|MD03G1034300|MD15G1302300|MD01G1214500|MD17G1185400|MD10G1253500|MD04G1088100|MD12G1198600|MD10G1198400|MD02G1210200|MD07G1277000|MD17G1155900|MD11G1215600|MD07G1150400|MD05G1070800|MD00G1058800|MD03G1190400|MD02G1312700|MD14G1102200|MD07G1101000|MD05G1190400|MD14G1203000|MD07G1017…
7275	1,6590E-5	2,5223E-4	77	5489	289	32615	multicellular organismal development	MD15G1092200|MD09G1205400|MD03G1118500|MD15G1157600|MD00G1170700|MD08G1112900|MD09G1183800|MD10G1085400|MD06G1196100|MD03G1034300|MD15G1302300|MD01G1214500|MD17G1185400|MD10G1253500|MD04G1088100|MD12G1198600|MD10G1198400|MD02G1210200|MD07G1277000|MD11G1215600|MD07G1150400|MD05G1070800|MD00G1058800|MD03G1190400|MD14G1102200|MD07G1101000|MD05G1190400|MD14G1203000|MD07G1017800|MD00G1043300|MD03G1222…
80060	1,6753E-5	2,5223E-4	4	18	289	32615	integument development	MD09G1205400|MD05G1273700|MD17G1185400|MD10G1253500
10557	1,6994E-5	2,5223E-4	18	634	289	32615	positive regulation of macromolecule biosynthetic process	MD02G1312700|MD11G1216000|MD14G1021600|MD02G1087500|MD09G1286900|MD09G1183800|MD07G1085000|MD17G1279200|MD06G1089700|MD05G1197600|MD07G1010500|MD10G1216700|MD11G1215600|MD15G1050300|MD10G1205400|MD04G1060200|MD05G1238400|MD02G1269700
45935	1,7352E-5	2,5311E-4	18	635	289	32615	positive regulation of nucleobase, nucleoside, nucleotide and nucleic acid metabolic process	MD02G1312700|MD11G1216000|MD14G1021600|MD02G1087500|MD09G1286900|MD09G1183800|MD07G1085000|MD17G1279200|MD06G1089700|MD05G1197600|MD07G1010500|MD10G1216700|MD11G1215600|MD15G1050300|MD10G1205400|MD04G1060200|MD05G1238400|MD02G1269700
51173	2,0053E-5	2,8754E-4	18	642	289	32615	positive regulation of nitrogen compound metabolic process	MD02G1312700|MD11G1216000|MD14G1021600|MD02G1087500|MD09G1286900|MD09G1183800|MD07G1085000|MD17G1279200|MD06G1089700|MD05G1197600|MD07G1010500|MD10G1216700|MD11G1215600|MD15G1050300|MD10G1205400|MD04G1060200|MD05G1238400|MD02G1269700
48507	2,1067E-5	2,9704E-4	14	411	289	32615	meristem development	MD15G1092200|MD09G1205400|MD03G1118500|MD11G1136800|MD12G1023500|MD08G1112900|MD03G1034300|MD17G1185400|MD10G1253500|MD10G1198400|MD11G1253500|MD04G1039800|MD05G1273700|MD00G1124100
1578	2,3473E-5	3,2555E-4	3	7	289	32615	microtubule bundle formation	MD00G1186200|MD06G1191400|MD14G1197800
48869	2,6600E-5	3,6296E-4	31	1564	289	32615	cellular developmental process	MD15G1092200|MD11G1216000|MD09G1205400|MD14G1067400|MD03G1118500|MD11G1136800|MD08G1112900|MD09G1183800|MD07G1085000|MD17G1185400|MD10G1253500|MD04G1088100|MD01G1178100|MD02G1210200|MD17G1155900|MD11G1215600|MD06G1053100|MD15G1050300|MD05G1273700|MD00G1058800|MD09G1171000|MD03G1190400|MD02G1312700|MD07G1101000|MD02G1087500|MD00G1043300|MD07G1010500|MD04G1039800|MD04G1060200|MD02G1269700|MD07G1115…
32501	2,9540E-5	3,9668E-4	80	5865	289	32615	multicellular organismal process	MD15G1092200|MD09G1205400|MD03G1118500|MD15G1157600|MD00G1170700|MD08G1112900|MD09G1183800|MD10G1085400|MD06G1196100|MD03G1034300|MD15G1302300|MD01G1214500|MD06G1191400|MD17G1185400|MD10G1253500|MD14G1197800|MD04G1088100|MD12G1198600|MD10G1198400|MD02G1210200|MD07G1277000|MD11G1215600|MD07G1150400|MD05G1070800|MD00G1058800|MD00G1186200|MD03G1190400|MD14G1102200|MD07G1101000|MD05G1190400|MD14G1203…
10604	3,8457E-5	5,0835E-4	19	739	289	32615	positive regulation of macromolecule metabolic process	MD02G1312700|MD11G1216000|MD14G1021600|MD02G1087500|MD09G1286900|MD09G1183800|MD07G1085000|MD17G1279200|MD06G1089700|MD05G1197600|MD07G1010500|MD10G1216700|MD08G1159600|MD11G1215600|MD15G1050300|MD10G1205400|MD04G1060200|MD05G1238400|MD02G1269700
21700	4,4839E-5	5,7475E-4	10	231	289	32615	developmental maturation	MD04G1088100|MD03G1190400|MD14G1067400|MD02G1087500|MD02G1210200|MD09G1183800|MD15G1050300|MD04G1060200|MD00G1043300|MD07G1115800
10053	4,4839E-5	5,7475E-4	10	231	289	32615	root epidermal cell differentiation	MD04G1088100|MD03G1190400|MD14G1067400|MD02G1087500|MD02G1210200|MD09G1183800|MD15G1050300|MD04G1060200|MD00G1043300|MD07G1115800
48364	4,5847E-5	5,7890E-4	21	882	289	32615	root development	MD03G1190400|MD14G1067400|MD02G1087500|MD09G1183800|MD10G1085400|MD07G1017800|MD00G1043300|MD04G1088100|MD12G1198600|MD10G1198400|MD02G1210200|MD14G1227500|MD04G1184900|MD14G1017600|MD02G1307800|MD09G1069300|MD15G1050300|MD04G1060200|MD05G1070800|MD00G1124100|MD07G1115800
22622	4,7350E-5	5,8909E-4	21	884	289	32615	root system development	MD03G1190400|MD14G1067400|MD02G1087500|MD09G1183800|MD10G1085400|MD07G1017800|MD00G1043300|MD04G1088100|MD12G1198600|MD10G1198400|MD02G1210200|MD14G1227500|MD04G1184900|MD14G1017600|MD02G1307800|MD09G1069300|MD15G1050300|MD04G1060200|MD05G1070800|MD00G1124100|MD07G1115800
43068	5,5787E-5	6,8400E-4	4	24	289	32615	positive regulation of programmed cell death	MD11G1216000|MD11G1215600|MD07G1085000|MD02G1269700
6970	6,1481E-5	7,4304E-4	23	1040	289	32615	response to osmotic stress	MD02G1087900|MD08G1070700|MD02G1084600|MD14G1021600|MD17G1086000|MD10G1184100|MD09G1286900|MD15G1215400|MD15G1215100|MD04G1229400|MD17G1279200|MD01G1144700|MD01G1084400|MD15G1215500|MD07G1211300|MD00G1065700|MD05G1197600|MD09G1184000|MD07G1165400|MD16G1029400|MD15G1051400|MD14G1187400|MD15G1051000
31328	6,5963E-5	7,7507E-4	18	704	289	32615	positive regulation of cellular biosynthetic process	MD02G1312700|MD11G1216000|MD14G1021600|MD02G1087500|MD09G1286900|MD09G1183800|MD07G1085000|MD17G1279200|MD06G1089700|MD05G1197600|MD07G1010500|MD10G1216700|MD11G1215600|MD15G1050300|MD10G1205400|MD04G1060200|MD05G1238400|MD02G1269700
9891	6,5963E-5	7,7507E-4	18	704	289	32615	positive regulation of biosynthetic process	MD02G1312700|MD11G1216000|MD14G1021600|MD02G1087500|MD09G1286900|MD09G1183800|MD07G1085000|MD17G1279200|MD06G1089700|MD05G1197600|MD07G1010500|MD10G1216700|MD11G1215600|MD15G1050300|MD10G1205400|MD04G1060200|MD05G1238400|MD02G1269700
9800	7,8905E-5	9,0208E-4	3	10	289	32615	cinnamic acid biosynthetic process	MD15G1215100|MD01G1084400|MD15G1051000
9803	7,8905E-5	9,0208E-4	3	10	289	32615	cinnamic acid metabolic process	MD15G1215100|MD01G1084400|MD15G1051000
6935	1,1179E-4	1,1972E-3	6	85	289	32615	chemotaxis	MD00G1124500|MD04G1006600|MD00G1170400|MD00G1124700|MD00G1170700|MD05G1190400
42330	1,1179E-4	1,1972E-3	6	85	289	32615	taxis	MD00G1124500|MD04G1006600|MD00G1170400|MD00G1124700|MD00G1170700|MD05G1190400
7626	1,1179E-4	1,1972E-3	6	85	289	32615	locomotory behavior	MD00G1124500|MD04G1006600|MD00G1170400|MD00G1124700|MD00G1170700|MD05G1190400
50918	1,1179E-4	1,1972E-3	6	85	289	32615	positive chemotaxis	MD00G1124500|MD04G1006600|MD00G1170400|MD00G1124700|MD00G1170700|MD05G1190400
10183	1,1179E-4	1,1972E-3	6	85	289	32615	pollen tube guidance	MD00G1124500|MD04G1006600|MD00G1170400|MD00G1124700|MD00G1170700|MD05G1190400
48768	1,2042E-4	1,2735E-3	4	29	289	32615	root hair cell tip growth	MD04G1088100|MD02G1210200|MD00G1043300|MD07G1115800
7610	1,3549E-4	1,4151E-3	6	88	289	32615	behavior	MD00G1124500|MD04G1006600|MD00G1170400|MD00G1124700|MD00G1170700|MD05G1190400
6415	1,3798E-4	1,4236E-3	4	30	289	32615	translational termination	MD09G1160100|MD15G1001000|MD17G1145900|MD08G1001700
9652	1,4277E-4	1,4552E-3	3	12	289	32615	thigmotropism	MD00G1186200|MD06G1191400|MD14G1197800
22621	1,5009E-4	1,4939E-3	18	752	289	32615	shoot system development	MD15G1092200|MD03G1190400|MD09G1205400|MD12G1023500|MD02G1088800|MD08G1112900|MD03G1034300|MD01G1214500|MD17G1185400|MD10G1253500|MD15G1216000|MD10G1198400|MD11G1253500|MD00G1142400|MD08G1159600|MD14G1017600|MD06G1053100|MD05G1273700
48367	1,5009E-4	1,4939E-3	18	752	289	32615	shoot development	MD15G1092200|MD03G1190400|MD09G1205400|MD12G1023500|MD02G1088800|MD08G1112900|MD03G1034300|MD01G1214500|MD17G1185400|MD10G1253500|MD15G1216000|MD10G1198400|MD11G1253500|MD00G1142400|MD08G1159600|MD14G1017600|MD06G1053100|MD05G1273700
10016	1,9578E-4	1,9259E-3	13	446	289	32615	shoot morphogenesis	MD15G1092200|MD03G1190400|MD09G1205400|MD12G1023500|MD08G1112900|MD03G1034300|MD17G1185400|MD10G1253500|MD10G1198400|MD11G1253500|MD08G1159600|MD06G1053100|MD05G1273700
31325	2,2193E-4	2,1581E-3	19	846	289	32615	positive regulation of cellular metabolic process	MD02G1312700|MD11G1216000|MD14G1021600|MD02G1087500|MD09G1286900|MD09G1183800|MD07G1085000|MD17G1279200|MD06G1089700|MD05G1197600|MD07G1010500|MD10G1216700|MD08G1159600|MD11G1215600|MD15G1050300|MD10G1205400|MD04G1060200|MD05G1238400|MD02G1269700
48262	2,3336E-4	2,1936E-3	2	3	289	32615	determination of dorsal/ventral asymmetry	MD09G1205400|MD17G1185400
48263	2,3336E-4	2,1936E-3	2	3	289	32615	determination of dorsal identity	MD09G1205400|MD17G1185400
9953	2,3336E-4	2,1936E-3	2	3	289	32615	dorsal/ventral pattern formation	MD09G1205400|MD17G1185400
9943	2,4369E-4	2,2655E-3	5	63	289	32615	adaxial/abaxial axis specification	MD03G1118500|MD11G1136800|MD12G1023500|MD05G1273700|MD10G1253500
48609	3,5709E-4	3,2837E-3	10	298	289	32615	reproductive process in a multicellular organism	MD01G1178100|MD11G1216000|MD07G1101000|MD17G1173700|MD07G1277000|MD11G1215600|MD07G1085000|MD00G1058800|MD02G1269700|MD09G1191100
9893	3,7169E-4	3,3811E-3	19	882	289	32615	positive regulation of metabolic process	MD02G1312700|MD11G1216000|MD14G1021600|MD02G1087500|MD09G1286900|MD09G1183800|MD07G1085000|MD17G1279200|MD06G1089700|MD05G1197600|MD07G1010500|MD10G1216700|MD08G1159600|MD11G1215600|MD15G1050300|MD10G1205400|MD04G1060200|MD05G1238400|MD02G1269700
19953	3,8387E-4	3,4548E-3	8	196	289	32615	sexual reproduction	MD01G1178100|MD11G1216000|MD07G1101000|MD11G1215600|MD07G1085000|MD09G1069300|MD00G1058800|MD02G1269700
9725	4,4243E-4	3,9399E-3	43	2860	289	32615	response to hormone stimulus	MD15G1092200|MD02G1084600|MD07G1127000|MD15G1369700|MD11G1216000|MD14G1021600|MD17G1086000|MD10G1184100|MD09G1286900|MD02G1191000|MD14G1134900|MD08G1112900|MD07G1085000|MD15G1323500|MD04G1229400|MD17G1279200|MD01G1214500|MD01G1084400|MD07G1211300|MD00G1065700|MD08G1070900|MD16G1271400|MD05G1197600|MD12G1198600|MD01G1031700|MD10G1198400|MD08G1183100|MD11G1215600|MD11G1267200|MD14G1102200|MD17G1173…
9955	4,5466E-4	4,0066E-3	5	72	289	32615	adaxial/abaxial pattern formation	MD03G1118500|MD11G1136800|MD12G1023500|MD05G1273700|MD10G1253500
48856	4,7450E-4	4,1384E-3	62	4619	289	32615	anatomical structure development	MD15G1092200|MD09G1205400|MD03G1118500|MD00G1170700|MD08G1112900|MD09G1183800|MD10G1085400|MD03G1034300|MD01G1214500|MD17G1185400|MD10G1253500|MD04G1088100|MD12G1198600|MD10G1198400|MD02G1210200|MD07G1277000|MD17G1155900|MD05G1070800|MD03G1190400|MD14G1102200|MD05G1190400|MD07G1017800|MD00G1043300|MD15G1216000|MD10G1216700|MD14G1227500|MD04G1039800|MD04G1184900|MD08G1159600|MD14G1017600|MD02G1307…
32504	4,8611E-4	4,1964E-3	10	310	289	32615	multicellular organism reproduction	MD01G1178100|MD11G1216000|MD07G1101000|MD17G1173700|MD07G1277000|MD11G1215600|MD07G1085000|MD00G1058800|MD02G1269700|MD09G1191100
10033	5,0890E-4	4,3068E-3	53	3787	289	32615	response to organic substance	MD15G1092200|MD17G1086000|MD15G1157600|MD02G1191000|MD14G1134900|MD08G1112900|MD15G1302300|MD17G1279200|MD01G1214500|MD01G1084400|MD00G1065700|MD08G1070900|MD05G1197600|MD12G1198600|MD01G1031700|MD10G1198400|MD08G1183100|MD11G1215600|MD11G1267200|MD14G1102200|MD13G1026400|MD15G1215100|MD01G1144700|MD14G1227500|MD04G1184900|MD02G1269700|MD02G1084600|MD07G1127000|MD15G1369700|MD11G1216000|MD14G1021…
10067	5,0908E-4	4,3068E-3	3	18	289	32615	procambium histogenesis	MD15G1092200|MD04G1039800|MD08G1112900
40011	5,7660E-4	4,8297E-3	6	115	289	32615	locomotion	MD00G1124500|MD04G1006600|MD00G1170400|MD00G1124700|MD00G1170700|MD05G1190400
9719	6,5515E-4	5,4339E-3	45	3095	289	32615	response to endogenous stimulus	MD15G1092200|MD02G1084600|MD07G1127000|MD15G1369700|MD11G1216000|MD14G1021600|MD17G1086000|MD10G1184100|MD09G1286900|MD02G1191000|MD14G1134900|MD08G1112900|MD07G1085000|MD15G1323500|MD04G1229400|MD17G1279200|MD01G1214500|MD01G1084400|MD07G1211300|MD00G1065700|MD08G1070900|MD16G1271400|MD05G1197600|MD12G1198600|MD01G1031700|MD10G1198400|MD08G1183100|MD11G1215600|MD11G1267200|MD14G1102200|MD17G1173…
10065	7,0195E-4	5,7656E-3	3	20	289	32615	primary meristem tissue development	MD15G1092200|MD04G1039800|MD08G1112900
43241	7,8045E-4	6,2289E-3	5	81	289	32615	protein complex disassembly	MD09G1160100|MD15G1001000|MD15G1157600|MD17G1145900|MD08G1001700
43624	7,8045E-4	6,2289E-3	5	81	289	32615	cellular protein complex disassembly	MD09G1160100|MD15G1001000|MD15G1157600|MD17G1145900|MD08G1001700
34623	7,8045E-4	6,2289E-3	5	81	289	32615	cellular macromolecular complex disassembly	MD09G1160100|MD15G1001000|MD15G1157600|MD17G1145900|MD08G1001700
32984	9,2036E-4	7,2769E-3	5	84	289	32615	macromolecular complex disassembly	MD09G1160100|MD15G1001000|MD15G1157600|MD17G1145900|MD08G1001700
8544	1,1086E-3	8,5264E-3	11	407	289	32615	epidermis development	MD04G1088100|MD03G1190400|MD14G1067400|MD02G1087500|MD02G1210200|MD09G1183800|MD06G1053100|MD15G1050300|MD04G1060200|MD00G1043300|MD07G1115800
7398	1,1086E-3	8,5264E-3	11	407	289	32615	ectoderm development	MD04G1088100|MD03G1190400|MD14G1067400|MD02G1087500|MD02G1210200|MD09G1183800|MD06G1053100|MD15G1050300|MD04G1060200|MD00G1043300|MD07G1115800
9913	1,1086E-3	8,5264E-3	11	407	289	32615	epidermal cell differentiation	MD04G1088100|MD03G1190400|MD14G1067400|MD02G1087500|MD02G1210200|MD09G1183800|MD06G1053100|MD15G1050300|MD04G1060200|MD00G1043300|MD07G1115800
9798	1,2551E-3	9,5657E-3	5	90	289	32615	axis specification	MD03G1118500|MD11G1136800|MD12G1023500|MD05G1273700|MD10G1253500
65001	1,3479E-3	1,0091E-2	4	54	289	32615	specification of axis polarity	MD03G1118500|MD11G1136800|MD05G1273700|MD10G1253500
9944	1,3479E-3	1,0091E-2	4	54	289	32615	polarity specification of adaxial/abaxial axis	MD03G1118500|MD11G1136800|MD05G1273700|MD10G1253500
48569	1,3671E-3	1,0146E-2	15	689	289	32615	post-embryonic organ development	MD09G1205400|MD17G1173700|MD07G1085000|MD10G1085400|MD07G1017800|MD17G1185400|MD10G1253500|MD10G1198400|MD07G1277000|MD08G1159600|MD02G1307800|MD05G1273700|MD05G1070800|MD02G1269700|MD09G1191100
48638	1,9886E-3	1,4350E-2	8	253	289	32615	regulation of developmental growth	MD11G1216000|MD09G1205400|MD12G1023500|MD10G1068600|MD11G1215600|MD00G1124100|MD17G1185400|MD05G1060800
51168	1,9939E-3	1,4350E-2	4	60	289	32615	nuclear export	MD09G1160100|MD15G1001000|MD17G1145900|MD08G1001700
48481	2,0016E-3	1,4350E-2	5	100	289	32615	ovule development	MD09G1205400|MD08G1159600|MD05G1273700|MD17G1185400|MD10G1253500
22411	2,0016E-3	1,4350E-2	5	100	289	32615	cellular component disassembly	MD09G1160100|MD15G1001000|MD15G1157600|MD17G1145900|MD08G1001700
80092	2,1192E-3	1,4817E-2	4	61	289	32615	regulation of pollen tube growth	MD11G1216000|MD10G1068600|MD11G1215600|MD05G1060800
10769	2,1192E-3	1,4817E-2	4	61	289	32615	regulation of cell morphogenesis involved in differentiation	MD11G1216000|MD10G1068600|MD11G1215600|MD05G1060800
60284	2,1192E-3	1,4817E-2	4	61	289	32615	regulation of cell development	MD11G1216000|MD10G1068600|MD11G1215600|MD05G1060800
48522	2,3688E-3	1,6342E-2	21	1193	289	32615	positive regulation of cellular process	MD15G1092200|MD02G1312700|MD11G1216000|MD14G1021600|MD02G1087500|MD09G1286900|MD08G1112900|MD09G1183800|MD07G1085000|MD17G1279200|MD06G1089700|MD05G1197600|MD07G1010500|MD10G1216700|MD08G1159600|MD11G1215600|MD15G1050300|MD10G1205400|MD04G1060200|MD05G1238400|MD02G1269700
43067	2,3760E-3	1,6342E-2	5	104	289	32615	regulation of programmed cell death	MD11G1216000|MD08G1159600|MD11G1215600|MD07G1085000|MD02G1269700
51656	2,8275E-3	1,9291E-2	4	66	289	32615	establishment of organelle localization	MD09G1160100|MD15G1001000|MD17G1145900|MD08G1001700
9651	2,8967E-3	1,9605E-2	17	897	289	32615	response to salt stress	MD14G1021600|MD17G1086000|MD10G1184100|MD09G1286900|MD15G1215100|MD04G1229400|MD17G1279200|MD01G1144700|MD01G1084400|MD07G1211300|MD00G1065700|MD05G1197600|MD07G1165400|MD16G1029400|MD15G1051400|MD14G1187400|MD15G1051000
3006	2,9358E-3	1,9712E-2	39	2782	289	32615	reproductive developmental process	MD00G1124500|MD15G1092200|MD11G1216000|MD00G1170400|MD14G1021600|MD09G1205400|MD11G1157100|MD00G1124700|MD00G1170700|MD08G1112900|MD07G1085000|MD03G1034300|MD17G1185400|MD10G1253500|MD03G1124000|MD01G1178100|MD12G1198600|MD05G1065100|MD10G1198400|MD11G1253500|MD07G1277000|MD11G1215600|MD06G1053100|MD05G1273700|MD00G1058800|MD15G1151800|MD04G1006600|MD14G1102200|MD07G1101000|MD17G1173700|MD05G1190…
48438	3,1688E-3	2,1109E-2	10	399	289	32615	floral whorl development	MD09G1205400|MD17G1173700|MD07G1277000|MD08G1159600|MD07G1085000|MD05G1273700|MD17G1185400|MD10G1253500|MD02G1269700|MD09G1191100
9737	3,2632E-3	2,1568E-2	19	1065	289	32615	response to abscisic acid stimulus	MD02G1084600|MD15G1369700|MD14G1021600|MD04G1163200|MD17G1086000|MD09G1286900|MD09G1073600|MD15G1215100|MD15G1323500|MD17G1279200|MD01G1144700|MD01G1084400|MD07G1211300|MD00G1065700|MD16G1271400|MD01G1031700|MD08G1183100|MD09G1069300|MD15G1051000
8285	3,9603E-3	2,5972E-2	3	36	289	32615	negative regulation of cell proliferation	MD14G1017600|MD07G1085000|MD02G1269700
48653	4,0831E-3	2,6572E-2	6	169	289	32615	anther development	MD17G1173700|MD07G1277000|MD08G1159600|MD07G1085000|MD02G1269700|MD09G1191100
45597	4,8701E-3	3,1451E-2	2	12	289	32615	positive regulation of cell differentiation	MD15G1092200|MD08G1112900
9733	5,2157E-3	3,3428E-2	15	795	289	32615	response to auxin stimulus	MD15G1092200|MD15G1369700|MD10G1184100|MD08G1112900|MD15G1323500|MD04G1229400|MD01G1144700|MD07G1211300|MD16G1271400|MD05G1197600|MD12G1198600|MD01G1031700|MD10G1198400|MD08G1183100|MD04G1184900
9699	5,3494E-3	3,4027E-2	11	500	289	32615	phenylpropanoid biosynthetic process	MD02G1087900|MD08G1070700|MD09G1184000|MD11G1063800|MD15G1215400|MD16G1158800|MD15G1215100|MD10G1205400|MD01G1084400|MD15G1215500|MD15G1051000
10942	5,6351E-3	3,5577E-2	4	80	289	32615	positive regulation of cell death	MD11G1216000|MD11G1215600|MD07G1085000|MD02G1269700
42127	5,7617E-3	3,6107E-2	5	128	289	32615	regulation of cell proliferation	MD15G1092200|MD08G1112900|MD14G1017600|MD07G1085000|MD02G1269700
9612	6,1240E-3	3,8095E-2	3	42	289	32615	response to mechanical stimulus	MD00G1186200|MD06G1191400|MD14G1197800
3002	6,7263E-3	4,1536E-2	8	310	289	32615	regionalization	MD09G1205400|MD03G1118500|MD11G1136800|MD12G1023500|MD05G1273700|MD17G1185400|MD10G1253500|MD03G1222900
48366	7,2920E-3	4,4703E-2	11	522	289	32615	leaf development	MD03G1190400|MD09G1205400|MD15G1216000|MD12G1023500|MD11G1253500|MD02G1088800|MD00G1142400|MD14G1017600|MD06G1053100|MD01G1214500|MD17G1185400
51640	7,5592E-3	4,5681E-2	4	87	289	32615	organelle localization	MD09G1160100|MD15G1001000|MD17G1145900|MD08G1001700
48654	7,6134E-3	4,5681E-2	2	15	289	32615	anther morphogenesis	MD07G1085000|MD02G1269700
48655	7,6134E-3	4,5681E-2	2	15	289	32615	tapetal layer morphogenesis	MD07G1085000|MD02G1269700
48440	7,8633E-3	4,6848E-2	5	138	289	32615	carpel development	MD09G1205400|MD08G1159600|MD05G1273700|MD17G1185400|MD10G1253500
9698	8,2071E-3	4,8554E-2	12	605	289	32615	phenylpropanoid metabolic process	MD02G1087900|MD08G1070700|MD09G1184000|MD11G1063800|MD07G1277000|MD15G1215400|MD16G1158800|MD15G1215100|MD10G1205400|MD01G1084400|MD15G1215500|MD15G1051000
48437	8,3844E-3	4,9258E-2	10	460	289	32615	floral organ development	MD09G1205400|MD17G1173700|MD07G1277000|MD08G1159600|MD07G1085000|MD05G1273700|MD17G1185400|MD10G1253500|MD02G1269700|MD09G1191100
