# Supplementary material for: The Identification of Small RNAs Differentially Expressed in Apple Buds Reveals a Potential Role of the Mir159-MYB Regulatory Module during Dormancy
Source: Plants (Basel). 2021 Dec 3;10(12):2665. doi: 10.3390/plants10122665 (PMC8703471; doi:10.3390/plants10122665)
Supplement: Supplementary file 1 [file plants-10-02665-s001.zip › Sup Table 5.xlsx]

## Sheet: Feuil1
Table S5. Primers used in this study.
Gene ID	Oligo Name	Sequence	Purpose	Reference
MD16G1219000	MDH F	CGTGATTGGGTACTTGGAAC	RT-qPCR	Perini et al - Mol Breeding (2014) 34:829–844
MD16G1219000	MDH R	TGGCAAGTGACTGGGAATGA	RT-qPCR	Perini et al - Mol Breeding (2014) 34:829–845
MD08G1215900	WD40 F	GGATTTACTGTGTTGGTGAAG	RT-qPCR	Perini et al - Mol Breeding (2014) 34:829–846
MD08G1215900	WD40 R	TGCCAATTACCTCCTTTTCGTG	RT-qPCR	Perini et al - Mol Breeding (2014) 34:829–847
MD10G1194200	MdNCED1 F	GTCCATGCCCTCCAGTTCAA	RT-qPCR	Lee et al - Plos one (2021) 16(4): e0249975
MD10G1194200	MdNCED1 F	TTTGGGAAATAGGGGACGGC	RT-qPCR	Lee et al - Plos one (2021) 16(4): e0249975
MD15G1082600	ABA 8'H F	AGAGAGGCTGTCGTTGATGT	RT-qPCR	This study
MD15G1082600	ABA 8'H R	GCATGCACTCCACTTCCAAA	RT-qPCR	This study
MD07G1085000	MYB33 F	ACTCAGGCCTGTTCCGTT	RT-qPCR	This study
MD07G1085000	MYB33 R	CCATGCGTGCCCATTTGT	RT-qPCR	This study
MD02G1269700	MYB65 F	ACAAATGGGCACGCATGG	RT-qPCR	This study
MD02G1269700	MYB65 R	TGCTGCACTCTGTCCACA	RT-qPCR	This study
pre-miR159a	miR159a F	CATGGCCCAGGAGATGTGAA	RT-qPCR	This study
pre-miR159a	miR159a R	GGAGCTCCCTTCAATCCAAGAA	RT-qPCR	This study
MD02G1269700	MYB65-GSP	CTGGCTCAAATGTACCAACCTGTG	PCR	This study
MD02G1269700	MYB65-nested-GSP	CCTCACAAATGTTCAAATTGGAACCTTT	nested PCR	This study
